# Supplementary material for: Context-dependent modification of PFKFB3 in hematopoietic stem cells promotes anaerobic glycolysis and ensures stress hematopoiesis
Source: eLife. 2024 Apr 4;12:RP87674. doi: 10.7554/eLife.87674 (PMC10994660; doi:10.7554/eLife.87674)
Supplement: Figure 1—figure supplement 1—source data 1. [file elife-87674-fig1-figsupp1-data1.xlsx]

## Sheet: D
	Ki67-					Ki67+
Ctl	89.4418	89.2857	81.8015	84.6	90.8178	10.5582	10.7143	18.1985	15.4	9.18224
Day 3	88.5081	89.4291	90.9091	92.9088	87.8509	11.4919	10.5709	9.09091	7.09123	12.1491
Day 6	74.2888	76.5799	51.994	46.4774	65.5836	25.7112	23.4201	48.006	53.5226	34.4164
Day 9	93.1412	95.3241	95.0513	96.2626	92.2565	6.85877	4.6759	4.9487	3.73737	7.7435
Day 12	96.3418	87.6265	95.8459	93.7464	96.0756	3.65823	12.3735	4.15412	6.25356	3.92438
Day 15	91.1333	87.1555	79.1056	84.2138	82.225	8.86666	12.8445	20.8944	15.7862	17.775

## Sheet: E
Ctl	Day 3	Day 6	Day 9	Day 12	Day 15
0.830386	0.9384	0.8537	0.750229	1.01113	1.12799
0.954532	0.919182	0.667746	0	1.14923	0
0.887977	1.14334	0.935587	0.700892	0.904667	0.809915
0.939506	0.914125	0.866304	1.01779	0.189328	1.04108
0.824242	0.888076	0.713127	0.690357	0.930643	0.847093
0.840099	0.852875	0.498213	0.989407	0.91526	0.892264
0.831096	0.782292	0.913364	1.09072	0.940022	1.03813
0.835456	0.978904	0.890896	1.10343	0.813055	0.99403
0.928549	0	1.08569	1.10466	0.973121	0.970752
0.894614	0	0.679829	0.407983	0.898906	0.885905
0.800873	0.926415	0.813409	0.877153	0.930864	1.06639
0.984147	0	0.728634	0.8295	0.87956	0.877908
0.869576	1.0047	0.621755	0.92553	0	0.897178
0.947845	0.818583	0.757767	0.995525	0.838031	0.876494
0.969033	0.950949	0.94124	0.919528	0.930221	0.959622
0.791163	0.89518	1.02797	1.01088	0.832402	0.950895
0.770527	0.885718	1.00701	1.02714	0.777484	0.804214
0.861275	0.949918	0	0.87512	0.862635	0.831546
0.887918	0.851971	0	0.886622	0.972626	0.933006
0.866003	0.817106	0.717818	0.43279	0.881715	0.769486
0.939674	0.773741	0.82774	1.18937	1.04149	0.84398
0.869789	0.824981	0.922996	0.915955	1.16182	0.946207
0.891423	0.841901	0.862932	1.14148	0.901794	0.857621
0.803221	0.853424	0.577859	0.625237	1.11369	0.89558
0.879798	0.87185	1.05782	0.919686	0.888537	0.982448
0.770164	0.818107	0	1.02144	0.565456	0.888577
0.906611	0.884827	0.877923	0.875662	0.694558	0.837039
0.906455	0.800233	0.820785	0.704308	0.73449	0.929872
1.00421	0.782801	0.738205	0.795538	0.862393	0.868121
0.23742	0.950109	0.746345	0.921372	0.989425	0.858178
0.872038	0.841213	0.938375	0.834919	0.962423	1.01054
0.942186	0.871938	0.645064	0.94693	0.901329	1.17581
0.85711	0.892265	0.970733	0.889701	1.05369	0.879886
0.898496	0.98353	0.566338	1.11152	0.955887	0.909773
0.81041	0.836591	0.440226	0.907574	0.878327	1.04634
0.965742	0.867617	0.66095	0	0.864066	0.872219
0.775826	0.933723	0.702552	1.06469	0.902578	0.784833
0.829165	0.907585	0.891451	0.828586	1.34772	0.909523
0.889135	0.849038	0.531946	0	0.874598	0.953722
0.924085	0.866291	0.928339	0.767984	0.735775	0.876835
0.803094	0.801081	0.768796	0.906069	0.99987	0.993385
0.816481	0.750576	0.504249	0.86033	0.832892	0.921574
0	0.839815	0.753748	1.103	0.911166	0.793686
0.871688	0.806116	0.863447	1.0073	0.858364	0.944218
0.970267	0.766745	0.407287	0	0.993568	0.902775
0.93409	0.798686	0.438677	1.00683	0.62335	0.954062
0.802214	0.772046	0.700272	0.790765	0.761043	1.15037
0.90077	0.878286	0.59858	0.980291	0.912851	0.893472
0.932465	0.800683	0.766165	0.92719	0.690964	0.930255
0.877335	0.752369	0.940546	0.781361	0.814213	0.971858
0.871205	0.678888	0.798232	0.877362	0.895524	1.08049
0.899839	0.872174	0.821032	0.833146	1.0138	1.0304
1.09587	1.03936	1.08333	0.480945	0.856622	0.88891
0.853791	0.728346	0.514879	0.942253	0.838624	0.921861
0.923041	0.785831	0.698305	0.881042	0.804731	0.946897
0.91283	0.746298	0	0.724258	0.854325	0.978403
0.923009	0.875381	0.536712	1.00504	0.805469	0.912294
0.836807	0.809849	0	1.02633	0.815064	0.880529
0.862361	0.905964	0.96998	0.802017	0.7107	0.792179
0.8827	0.916407	0.914864	0.918701	0.840201	0.794135
0.865948	0.859897	0.835554	1.04159	0.852488	0.85715
0.935347	0.789502	0.744817	0.85377	0.802218	0.801414
0.796551	0.815666	0.846542	0.935351	0.996943	0.978568
0.898671	0.776121	0.468124	0.783199	0.823741	0.968139
0.811285	0.811659	0.778251	0.742682	0.894967	0.827851
0.820784	0.843303	1.07591	0.920162	0.912866	0.881325
0.94607	0.903989	0.897472	1.021	0.736668	0.951667
0.710085	0.935579	0.952013	0.901451	0.808527	0.967159
0.751648	0.717552	0.798167	0.985927	1.12422	0.833179
0.967638	0.687808	0.756358	0.24042	0.87042	0.871316
	0.800025	0.736015	0.865493	0.872194	0.899484
	0	0.801076	0.888938	0.829923	0.958186
	0.883866	0.534276	0.664726	0.901107	0.875967
	0.884275	0.842197	0.97504	0.817592	0.870887
	0.799652	0.987432	0.966941	0.85947	0.872497
	0.769367	0.898464	0.802904	0.798125	0.92967
	1.03468	0.843917	0.971537	0.865206	0.970321
		0.896578	0.61798	0.911806	0.842274
		0.990639	0.792824	0.849357	0.838825
		1.01197	0	0.819284	0
		0.648032	0.265299	0.709375	0.982099
		0.214988	0.704913	0.874042	0.784251
		0.953979	0.761164	0.891875	0.823552
		0.448718	0.844046	0.888267	0.906414
		1.09085	0.979847	0.820068	0.885186
		0.842301	0.910141	0.995167	0.900337
		0.44445	1.25077	0.840565	0.868711
		0.808589	0.883262	0.978857	1.00078
		0.870541	0.967261	0.87138	0.795453
		0.865937	0.77663	0.884562	1.01066
		0.843137	1.07817	0.814249	0.888381
		0.848626	0.999674	0.869218	0.779869
		0.732751	0.941928	0.823597	0.842747
		0.883348	0.921729	0.760357	0.902067
		0.929142	0.678945	0.774617	0.798955
		0.560793	0.865706	0.857327	0.968659
		0.856011	0.894129	0.883983	0.938925
		0.733587	0.604721	0.90287	0.873036
		0.849611	0.964111	0.879619	0.881361
		0.817688	0.187743	0.768747	0.891745
		0.736072	0.754645	0.650627	0.744675
		0.74184	0.861939	0.999117	0.953819
		0.967795	0.814163	0.789338	0.982302
		0.949757	0.935243	0.84484	0.872477
		0.73502	0.931598	0.851086	0.930144
		0.707433	1.02094	0.818747	0.873351
		0.821398	0.916708	0.820018	0.677195
		0.903966	0.966317	0.822157	0.755711
		0.670557	0.804499	0.853992	0.844921
		0.808469	0.806563	0.787347
		0.790435	0.904337	0.892427
		0.922602	0.94206	0.787784
		0.835601	0.684994	0.841638
		1.09493	0.889353	0.973625
		0.845618	1.05875	0.819886
		0.869156	0.951671	0.986901
		0.723115	0.806899	0.804791
		0.865383	0.787197	0.880347
		0.694821	0.863948	0.849672
		0.858309	0	1.04454
		0.853333	1.0259	0.839749
		0.706174	1.28762	0.885542
		0.705878	0.740015	0.991039
		0.796267	1.00383	0.774893
		0.783686	0.952702	0.801127
		0.793826	1.00417	0.983546
		0	0.877368	0.832732
		0.851787	0.807338	0.773342
		0.681662	0.826665	0.938808
		0.174687	0.796712	0.87569
		0.793035	0.206375	0.816224
		0.919034	0.717167	0.253472
		1.03973	0.888542	0.817288
		0.456578	0.959879	0.891019
		0.82536	0.884829	0.925716
		0.856132	0.844926	0.81291
		0.605528	0.792003	0.758502
		0.861917	0.901122	0.904644
		1.01231	0.767675	0.771413
		1.00125	0.95675	0.865898
		0.220349	0.946454	0.856226
		0	0	0.906758
		0.744202	0.928947	0.948549
		0.883619	0.879474
		0.818114	1.0332
		0	0.732084
		0.811854	0
		0.803289	1.16501
		0.74992	0.796553
		0.84104	0.781117
		0.855499	1.00055
		0.805643	0.91271
		0.953474	0.712535
		0.691226	0.84544
		0.211319	1.1446
		0.813171	0.829442
		0.661177	0.791604
		0.550568	0.731758
		0.848888	0.943017
		0.921423	1.02035
		0.760128	0.731971
		0.871652	0.758608
		0.786556	0.755624
		0.706496	0.859278
		0.896103	0.863212
		0.753568	0.91446
		0.938452	0.686035
		0.931033	0.932569
		0.927082	0.721421
		0.814364	0.796663
		0.815202	0.9393
		0.874364	0.815685
		0.665178	0.903532
		0.795378	0.893962
		0.895091	0.972272
		0.782341	0.860347
		0.869223	0.776692
		1.03404	0.865032
		0.714816	0.928544
		0.940489	0.878087
		0.877825	0.893192
		0.814678	0.948677
		0.835019	0.812452
		0.541248	0.739164
		0.79808	0.941683
		0.454184	0.853051
		0.626787	0.95267
		0.49862	0.902421
		0.66087	0.984838
		0.810858	0.625975
		0.703321	0.87523
		0.943621	0
		0.866714	0.829796
		0.781985	0.866695
		0.884278	0.793058
		0	0.935593
		0.788466	0
		0.754505	0.924736
		0.771755	0.810444
		0	0.765678
		0.60219	0.773878
		0.661057	0
		0.867111	0.858809
		0.878663	0.855158
		0.973719	0.90392
		0.728465	0.828759
		0.925412	0.404574
		0.257246	0.899974
		0.829042	0.987149
		0.108963	0.961927
		0.847392	0.815432
		0.986291	0.930444
		0.735407	0.836411
		0.751615	1.01738
		0.755173	1.08862
		0.708001	0.747817
		0.637562	0.977584
		0.833272	0.724501
		0.741314	0.820314
		0.571122	0.711592
		1.0297	0.953301
		0.875665	0.906503
		0.694881	1.00386
		0.758449	0.986427
		0.799589	0.873985
		0.349681	0.799567
		0.695583	0.871791
		0.920666	0.857988
		0	0.769934
		0.830171	0
		0.842724	0.858277
		0.779402	0.921673
		0.862869	0
		0.507777	0.903769
		0	0.682682
		0.872217	0
		0.827681	0
		0.79269	0.811623
		0.895663	0.908667
		0.505932	0.791777
		0	0.967667
		0.799437	0.819838
		0.808987	0.942595
		0.825417	0.477101
		0.895754	0.751474
		0.832403	0.80763
		1.17839	0.839999
		0.716896	1.06853
		0.846016	0.868857
		0.740649	0.912507
		0.494169	0.928253
		0.711053
		0.664299
		1.0154
		0.673443
		0.745747
		0.832455
		0.852949
		0.915508
		0.883228
		0.839226
		0.846459
		0.767026
		0.979363
		1.01265
		0.402272
		0.763165
		0.872502
		0
		0.640119
		0.837119
		1.07803
		0
		0.960541
		0.66645
		0.762507
		0.749834
		0.695969
		0
		0.840609
		0.873071
		0.897233
		0.608649
		0.402684
		0.801808
		0.764744
		0.747745
		0.731819
		0.780397
		0.568642
		0.887941
		0.803736
		0.575748
		0.752823
		0.862637
		0.780455
		0
		0.672099
		0.666466
		0.940273
		0.832407
		0.553375
		0.833565
		0.66786
		0.816784
		0.923588
		0.822962
		0.434208
		0.949672
		0.813236
		0.710407
		0.469307
		0.847573
		0.78416
		0.828089
		0.841699
		0.894726
		0.77673
		0.888103
		0.708399
		0.764956
		0.791768
		0.871606
		0.923545
		0.761403
		0.654683
		0.89293
		0.672071
		0.847726
		0.904488
		0.566273
		0.533857
		0.850968
		1.05748
		0.657875
		0.922928
		0.775775
		0.69654
		0.820158
		0.534587
		0.790536
		0.734856
		0.610933
		0.557262
		0.881553
		0.80834
		0.700654
		0.679368
		0.753065
		0.728425
		0.855031
		0.966115
		0.87317
		0.93708
		0.722101
		0.714571
		0.707975
		0.741415
		0.731727
		0.821331
		0.340618
		0.802072
		0.75357
		0.972191
		0.967287
		0.763248
		0.903969
		0.969121
		0
		0.753643
		0.79766
		0.73926
		0.735314
		0.80645
		0.637415
		0.720708
		0.742106
		0.823724
		1.0037
		0.734215
		0
		0.887266
		0.883828
		0.511654
		0.80502
		0.763835
		0.837021
		0.763545
		0.78401
		0.389264
		0.872803
		0.644408
		0.961363
		0.884679
		0.617043
		0.712128
		0.774789
		0.861052
		0.886289
		0.801284
		0.819337
		0.901753
		0.774899
		0.686578
		0.663288
		0.904547
		0.800282
		0.684773
		0.619846
		0.594632
		0.80197
		0.742739
		0
		0.816269
		0.823329
		0.972317
		0.74117
		0.856794
		0.582459
		0.95423
		0.789623
		0.851167
		0.915619
		0.842518
		0.844246
		0.710259
		0.537527
		0.786313
		0.846882
		0.741915
		0.793227
		0.766486
		0.821828
		0.269716
		0.798838
		0.764816
		0.328171
		0.595337
		0.620347
		0.867962
		0.690028
		0.820886
		0.823824
		0.647315
		0.771771
		0.843621
		0.58476
		0.316726
		0.938921
		0.882201
		0.799322
		0.893671
		0.802795
		0.853508
		0.852118
		0.81804
		0.882213
		0.805164
		1.11352
		1.00562
		0.923171
		0.527363
		0.360706
		0.746193
		0.974801
		0.938041
		0.81139
		0.862442
		0.891453
		0.991574
		0.792421
		0.878928
		0.757125
		0.761353
		0.606462
		0.740308
		0
		1.01433
		0.629183
		0.678529
		0.965052
		0.303418
		0.608783
		0.828517
		0.786664
		0.827061
		0.329361
		0.823928
		0.721835
		0.915194
		0.918208
		0.861091
		0.663109
		0
		0.86206
		0.779725
		0.843783
		0.613862
		0.962736
		0.480655
		0.759159
		0.655684
		0.724501
		0.830082
		0.873855
		0.782154
		0.790968
		0.771938
		0.795723
		0.703083
		0.751862
		0.41616
		0.974121
		0.908076
		0.5038
		0.747006
		0.80991
		0.840142
		0.75108
		0.738503
		0.319566
		0.823366
		0.781175
		0.885239
		0.792394
		0.837103
		0.716367
		0.860083
		0.792473
		0.821054
		0.816667
		0.806638
		0.786789
		0.795156
		0.918519
		0.751665
		0.783687
		0.894752
		0.749092
		1.04185
		0.873859
		0.775105
		0.84543
		0.808583
		0.698419
		0.94271
		0.709005
		0
		0.752454
		0.805435
		0
		0.684443
		0.600051
		0.935873
		0.924992
		0.877887
		0.744537
		0.844811
		0.726577
		0.757691
		0.603607
		1.05706
		0.925568
		0.892326
		0.834783
		0.912958
		0.411999
		0.740189
		0.838317
		0.743885
		0.673031
		0.179616
		0.855027
		0.912181
		0.910998
		0.302713
		0.716387
		0.563233
		0.712511
		0.769945
		0.786292
		0.88506
		0.848497
		0.666539
		0.77783
		0.286691
		0.753327
		0
		0.912636
		0.442215
		0.75829
		0.803047
		0
		0.764547
		0.800374
		0.920322
		0.650761
		0.760408
		0.870619
		0.873444
		0.771083
		0.752925
		0.753202
		0.81059
		0.770036
		0.978997
		0.753788
		0.748318
		0.752584
		0.917159
		0.925604
		0.739255
		0.853789
		0.977873
		0.724694
		0.823288
		0.806859
		0.768074
		0.939149
		0.797547
		0.553094
		0.803382
		0.847419
		0.892012
		0.848414
		0.711733
		0.818296
		0.777755
		0.734411
		0.313223
		0.687986
		0.787896
		0.178713
		0.928578
		0.708534
		0.79876
		0.743851
		0.98197
		0.465124
		0.825202
		0.841677
		0.927841
		0.681715
		0.786049
		1.04014
		0.484759
		0.383512
		0.786874
		0.188299
		0.694427
		0.764106
		0.761566
		0.768573
		0.885376
		0.481044
		0.411872
		1.15149
		0.859559
		0.678649
		0.753522
		0.665107
		0.677876
		0.791422
		0.750354
		0.484126
		0
		0.82602
		0.65482
		0.855785
		0.839723
		0
		0.882587
		0.525339
		0.896194
		0.677327
		0
		0.741604
		0.790862
		0.853194
		0.873702
		0.802546
		0.619822
		0.729049
		0.773413
		0.530392
		0.847458
		0.86794
		0.746427
		0.829851
		0.762067
		0.75913
		0.897458
		0.769298
		0.873925
		0.895204
		0.675679
		0.781236
		0.822687
		0.732054
		0.805112
		0.624467
		0.600027
		0.645562
		0.748941
		0.729403
		0.929759
		0.727682
		0.878954
		0.807133
		0.831
		0.760623
		0.319289
		0.827794
		0.807892
		0
		0.700983
		0.664772
		0.847005
		0.60179
		1.05611
		0.574805
		0.805882
		0.957607
		0.451516
		0.707085
		0.676031
		0.685857
		0.804136
		0.717582
		0.712538
		0.799801
		0.437312
		0.925369
		0.791804
		0.851078
		0.795479
		0.637332
		0.863766
		0.693338
		0.797629
		0.81099
		0.763814
		0.894252
		0.566295
		0.937474
		0.873548
		0.889831
		0.680774
		0.30806
		0.847047
		0.906346
		0.884993
		0.677558
		0.734003
		0.676138
		0.175031
		0.882269
		0.942194
		0.796149
		0.597816
		0.694858
		0
		0.899271
		0.591803
		0.629532
		0.784212
		0.485142
		0.708047
		0
		0.653957
		0.716523
		0.560786
		0.67182
		0.750977
		0.691137
		0.904868
		0.569959
		0.742415
		0.773164
		0
		0.817826
		0.914429
		0.839633
		0.884988
		0.810901
		0.722823
		0
		0.296887
		0
		0.766408
		0.779934
		0.711885
		0.719605
		0.771334
		0.855463
		0.610676
		0.768362
		0.737975
		0.729003
		0.819848
		1.0633
		0.786044
		0.676467
		0
		0.669579
		0.172099
		0.69297
		0.711732
		0.76365
		0.770529
		0.986361
		0.789218
		0.435754
		0.844274
		0.668879
		0.766186
		0.784179
		0.843425
		0.717479
		0.752557
		0.680931
		0.880262
		0.50899
		0.788782
		0.702476
		0.719237
		0.625507
		0.898266

## Sheet: F
	Ki67-				Ki67+
Vehicle(i.p.)	94.0391	79.8607	87.8479	86.9931	5.96095	20.1393	12.1521	13.0069
5-FU (i.p.)	64.988	74.5263	55.7971	66.2003	35.012	25.4737	44.2029	33.7997
5-FU (i.v.)	57.2917	53.23	58.4184	67.8814	42.7083	46.77	41.5816	32.1186

## Sheet: H
	pRb-			pRb+			DNA 2x
PBS	84.3525	84.8002	73.1707	12.6872	13.9489	21.7886	2.96034	1.25097	5.04065
5-FU	58.2766	57.4713	50.4598	23.8095	24.8276	29.3103	17.9138	17.7011	20.2299
PBS	46.0013	39.3531	38.6864	45.5792	52.5067	53.2469	8.4195	8.14016	8.06674
5-FU	20.5036	21.317	20.4413	45.9233	52.0089	45.8769	33.5731	26.6741	33.6818

## Sheet: K
Total HSC			EPCR+ HSC			EPCR+ HSC
PBS	5-FU		PBS	5-FU		PBS	5-FU
64	48		82.4	69.8		53.4	28.5
77.2	57.9		91.8	85.8		72.5	51.2
73.3	46.6		91.9	77.6		64.2	35.6
91.3	41		97.4	63.5		82.1	23.1
	52.2			37.1			52.6

## Sheet: L
	PBS			5-FU
no NBDG	156	156	149	177	178	181
NBDG	5359	5925	5713	9906	10970	10602
NBDG+cyto	5497	5291	5451	9427	9729	9259
NBDG+phlo	4254	4398	4623	8993	8600	8736

## Sheet: M
	G0						G1						SG2M
PBS (NBDGlow)	78.8032	76.5944	77.8431	73.9517	76.5724	77.4435	14.4332	16.2568	15.8414	17.2485	16.9931	16.4463	6.76359	7.14881	6.31557	8.79983	6.43457	6.11013
PBS (NBDGhigh)	61.5472	68.1008	61.1241	65.2365	72.4605	64.0312	11.9454	11.423	20.3747	14.3014	13.2054	18.931	26.5074	20.4762	18.5012	20.462	14.3341	17.0379
5-FU (NBDGlow)	49.2424	41.3019	46.5222	41.9355	39.7642	49.0758	34.8485	41.3019	36.0319	43.6559	45.4448	40.8965	15.9091	17.3962	17.4458	14.4086	14.791	10.0276
5-FU (NBDGhigh)	35.078	39.4939	38.4956	33.6623	41.5301	37.5	37.0824	35.5336	39.1593	48.5746	38.7978	41.8432	27.8396	24.9725	22.3451	17.7632	19.6721	20.6568

## Sheet: N
	Quiescence-maintaining				Proliferative
Ctl	100				100
1nM	44.4097	48.8283	38.8732	36.4587	119.485	103.782	97.0184	90.4099
3nM	14.0455	4.79564	7.50621	5.15352	38.1739	32.7205	25.0894	36.1948
10nM	0	0	7.34651	2.1054	14.1789	23.0116	18.23	24.6351
30nM	4.07417	0	4.9151	2.38952	15.2236	12.8817	29.025	11.2009
