# Supplementary material for: Context-dependent modification of PFKFB3 in hematopoietic stem cells promotes anaerobic glycolysis and ensures stress hematopoiesis
Source: eLife. 2024 Apr 4;12:RP87674. doi: 10.7554/eLife.87674 (PMC10994660; doi:10.7554/eLife.87674)
Supplement: Figure 1—figure supplement 2—source data 1. [file elife-87674-fig1-figsupp2-data1.xlsx]

## Sheet: A
	Pre-sorting			Post-sorting
G6P	0.0307	0.0687	0.0743	0.0199	0.0123	0.0058
F6P	0.132	0.148	0.173	0.0427	0.0188	0.041
F1,6BP	0.0142	0.0082	0.0212	0.0204	0.0124	0.00891
DHAP+GAP	0.0462	0.0584	0.0863	0.0541	0.0344	0.0334
3PG2PG	0.0118	0.0524	0.111	0.169	0.175	0.18
PEP	0.0277	0	0.0706	0.000287	5.02e-05	0.0522
Pyr	1.54	0	13.1	4.8	4.3	1.3
Lac	52.9	0	351	7.4	9.81	15
Cit	2.69965	17.2682	26.7166	2.87839	2.51263	2.36429
Iso	0.0566	0.417	0.264	0.296	0.168	0.168
2OG	0.138	0.881	0.761	0.562	1	0.644
SUC	17.9	0	172	81.4	79.3	32.9
FUM	0.5	2.1	3.87	1.86	1.79	1.74
Mal	0.669	0	4.08	2.67	3.1	1.81
6PG	0.0109	0.00812	0.0217	0	0	0
PRPP	0.0189	0.0845	0.211	0.457	0.459	0.481
R5P	0.0621	0	0	0	0	0
S7P	0.049	0.181	0.306	0	0	0
IMP	0.289	0.904	2	1.24	1.48	1.36
ATP	0.57	2.06	6.35	21.8	19.2	17.9
Glutathione	20.2	13.3	6.79	3.43	5.48	10.8

## Sheet: B
G6P					F6P					F1,6BP					G3P+DHAP					3PG+2PG					Pyr					Lac
PBS	5FU	DMSO	Oligo		PBS	5FU	DMSO	Oligo		PBS	5FU	DMSO	Oligo		PBS	5FU	DMSO	Oligo		PBS	5FU	DMSO	Oligo		PBS	5FU	DMSO	Oligo		PBS	5FU	DMSO	Oligo
0.781455	1.6252	0.311106	0.0415938		13.1671	21.9954	2.24492	1.84825		3.95787	25.9823	12.7771	24.6251		4.85114	35.8872	13.4491	23.4282		5.87893	14.4195	9.77747	43.3732		0.195868	1.39672	0.447546	0.380024		5.46577	17.174	8.40795	14.1174
1.25391	0.886027	0.417895	0.0722549		15.0876	16.577	0	0.887948		4.41648	12.0811	25.5698	12.6733		6.25909	16.128	24.6335	11.2278		7.51644	8.30154	20.7055	82.8697		0.600854	0.173096	0.152916	0.065229		7.27792	12.0866	7.9852	7.23536
1.11286	1.67706	0.431171	0.0981315		15.0161	18.2152	4.64211	1.52713		4.44416	19.6392	23.6893	23.5405		5.95409	25.9524	22.5352	21.7422		4.87629	12.6588	13.8996	93.9286		0.112487	0.739183	0.206146	0.185196		10.3747	14.2261	6.94516	10.0667
		0.73808	0.137435				7.6682	1.82301				22.2035	29.9229				22.3432	27.1898				27.3273	117.981				0.178554	0.170292				6.17189	8.87817
6PG					R5P+Xu5P+Ru5P					S7P					E4P					PRPP					IMP
PBS	5FU	DMSO	Oligo		PBS	5FU	DMSO	Oligo		PBS	5FU	DMSO	Oligo		PBS	5FU	DMSO	Oligo		PBS	5FU	DMSO	Oligo		PBS	5FU	DMSO	Oligo
0.513886	1.89282	2.74497	2.28255		0.614857	3.61256	0.71814	0.544283		1.47098	1.88557	0.53911	0.331023		0.08706	0.175379	0.211257	0.684403		4.29099	8.63577	0	0		0.004147	0.032736	0	0.309078
1.52904	1.50582	6.16194	4.0229		1.65559	1.89426	0.849362	0.716405		1.91697	1.27174	0.485356	0.883898		0.096642	0.432056	0.291925	0.0978742		5.88169	7.65256	0	0		0.005098	0.019287	0.226247	0.248159
1.91583	3.02814	6.0462	6.39138		0.688512	3.19842	1.90386	1.76928		1.40404	1.86478	1.28045	1.51866		0	0.179321	0.302647	0.177477		1.66283	8.6395	0	0		0	0.020157	0.111636	0.403283
		5.5091	8.60634				1.01549	1.18851				0.804827	0.928715				0.277841	0.241606				0	0.0107087				0.313704	0.305123
ATP					GTP					UTP					TTP
PBS	5FU	DMSO	Oligo		PBS	5FU	DMSO	Oligo		PBS	5FU	DMSO	Oligo		PBS	5FU	DMSO	Oligo
0.626533	1.4319	0.067427	0		0.165507	0.430711	0	0		0.131462	0.343434	0.0779192	0		0	0	0	0
0.752672	0.925104	0.0463879	0		0.210031	0.200355	0	0		0.159254	0.229288	0	0		0	0	0	0
0.331967	1.2334	0.0528221	0		0.036716	0.39664	0	0		0.011954	0.379556	0	0		0	0	0	0
		0.140972	0				0	0				0	0				0	0
CIT					ACO					2OG (M+2)					SUC (M+2)					FUM					MAL (M+2)					OAA
PBS	5FU	DMSO	Oligo		PBS	5FU	DMSO	Oligo		PBS	5FU	DMSO	Oligo		PBS	5FU	DMSO	Oligo		PBS	5FU	DMSO	Oligo		PBS	5FU	DMSO	Oligo		PBS	5FU	DMSO	Oligo
15.801	35.4298	42.9199	48.8716		0.26102	0.353733	0.427735	0.577246		0.36192	1.05624	0.165598	0.0389921		1.71827	6.6506	27.0118	28.4814		0.0309	0.036367	0.0463361	0.132499		3.90895	8.23764	4.54527	5.21902		0	0	0	0
18.952	22.4023	19.631	19.91		0.167203	0.250384	0.144921	0.26953		0.826637	0.456695	0	0		2.99096	5.10245	9.89474	10.5082		0.025659	0.055797	0.00501996	0.026613		4.76502	5.91177	2.7956	2.39998		0	0	0	0
34.666	23.3881	26.0164	24.2159		0.324919	0.26254	0.323798	0.242529		0.32461	0.80136	0.0649475	0		6.27661	4.17237	17.0347	15.0508		0.042576	0.046458	0.0739574	0.027411		5.58307	6.82013	4.1342	3.76858		0	0	0	0
		18.9021	20.4435				0.230889	0.235983				0.148487	0.016769				14.1385	15.6949				0.0662393	0.0422317				3.17917	3.25214				0	0
CIT (M+4)					2OG (M+3)					2OG (M+4)					SUC (M+3)					MAL (M+3)
PBS	5FU	DMSO	Oligo		PBS	5FU	DMSO	Oligo		PBS	5FU	DMSO	Oligo		PBS	5FU	DMSO	Oligo		PBS	5FU	DMSO	Oligo
0.28933	0.312272	0.354178	0.202135		0.12347	0.316354	0.08116	0.0614758		4.97802	8.69721	0	0.303559		0.097524	0.278887	0.166961	0.191864		2.95107	6.13036	1.42912	3.67768
0.16341	0.433205	0.775697	0.0591067		0.239362	0.131093	0	0.0347772		5.51739	9.13338	0	0		0.088835	0.149108	0.0548957	0.103854		3.47816	3.84416	0.88571	1.41523
0.089728	0.5887	0.79238	0.105471		0.077874	0.212749	0.0545508	0		10.974	5.52254	0	0		0.136506	0.148639	0.0506021	0.117564		3.34289	5.90224	1.47187	2.39538
		0.526141	0.101419				0.0583062	0.060232				0	0				0.132731	0.152751				1.13914	2.28464

## Sheet: C
	PBS			5-FU
G6P	99.5187	94.3557	99.4356	99.6039	100	98.7704
F6P	100	100	100	99.9535	100	100
F1,6BP	99.3863	98.3392	100	99.8613	99.8016	99.8671
GAP+DHAP	97.4894	95.8802	94.361	98.8196	98.885	99.6278
3PG+2PG	87.5927	83.2599	88.9772	92.6743	89.6347	92.3529
PYR	2.80784	0.916934	0.518082	3.19779	0.533359	2.3753
LAC	0.203428	0.154792	0.131794	0.242695	0.176578	0.276466

## Sheet: D
	PBS			5-FU
CIT	1.42576	1.32452	1.28565	1.2823	1.2129	1.40169
ACO	1.37458	0.769922	0.77393	0.861411	0.816636	1.04679
2OG	6.06837	7.363	2.86739	5.04843	4.98678	6.32287
SUC	0.562394	0.978168	0.818849	0.732402	1.05683	0.901888
FUM	0.664336	0.378162	0.325883	0.256329	0.595594	0.564035
MAL	3.65483	2.99367	1.81017	2.54543	2.65162	3.3498

## Sheet: E
	PBS			5-FU
6PG	100	96.4281	100	100	100	99.5806
Ru5P+Xu5P+R5P	73.5597	83.3694	63.8816	90.3718	88.3873	95.3153
S7P	99.4204	99.0765	100	100	99.6338	100
E4P	100	80.7209	100	76.3416	100	100
PRPP	97.8326	97.7353	100	99.7839	98.5869	99.2147
IMP	10.6513	3.00274	0	29.2732	31.2093	29.1924
ATP	2.32875	2.14925	1.62489	3.45621	3.06249	3.33816
GTP	4.51995	4.89586	1.70272	6.08141	4.62894	6.32714
UTP	4.30347	4.12567	0.559408	7.49921	7.83922	10.1525

## Sheet: F
	Vehicle				Oligomycin
G6P	100	98.3196	97.9707	100	100	100	100	94.7651
F6P	100	0	100	100	100	100	100	100
F1,6BP	99.7431	98.0883	99.2665	98.8271	99.7562	97.5464	98.9867	98.2362
G3P+DHAP	98.8659	97.8239	97.5623	98.4285	98.731	96.6384	98.8991	98.0883
3PG+2PG	89.4419	82.5986	88.1079	87.5964	90.6774	83.0764	88.9788	84.8137
PEP	67.1159	82.548	79.068	84.4081	85.4896	81.7035	80.3731	86.4977
PYR	1.06382	1.00464	0.852649	1.68048	0.617587	0.657443	1.20706	1.53043
LAC	0.106837	0.249652	0.145738	0.162063	0.174213	0.29958	0.229336	0.263139

## Sheet: G
	Vehicle				Oligomycin
CIT	1.31958	1.29881	1.30746	1.25773	1.36766	1.37044	1.33202	1.38071
ACO	0.796809	0.634661	1.00198	1.05193	0.947896	0.983873	0.804563	0.930924
2OG	0.650089	0	0.461853	1.22257	0.171747	0	0	0.199313
SUC	1.03955	1.06147	1.05374	1.07292	1.06068	1.1708	1.07345	1.12017
FUM	0.137459	0.034246	0.437028	0.402151	0.385444	0.274374	0.147097	0.266943
MAL	1.13572	1.64043	1.69125	1.41416	1.06578	1.29322	1.37296	1.28901

## Sheet: H
	Vehicle				Oligomycin
6PG	99.5065	99.7215	100	100	100	99.3704	99.7941	99.8541
Ru5P+Xu5P+R5P	59.8552	82.489	91.4634	79.6831	52.767	77.9316	81.7373	83.206
S7P	100	100	100	100	100	99.4058	100	99.4156
E4P	100	100	100	100	100	100	100	100
IMP	0	16.2075	13.813	22.9979	9.38625	3.43298	5.50521	3.49577
ATP	0.329529	0.336115	0.310274	0.569241	0	0	0	0
GTP	0	0	0	0	0	0	0	0
UTP	2.86333	0	0	0	0	0	0	0
