# Supplementary material for: Context-dependent modification of PFKFB3 in hematopoietic stem cells promotes anaerobic glycolysis and ensures stress hematopoiesis
Source: eLife. 2024 Apr 4;12:RP87674. doi: 10.7554/eLife.87674 (PMC10994660; doi:10.7554/eLife.87674)
Supplement: Figure 1—figure supplement 3—source data 1. [file elife-87674-fig1-figsupp3-data1.xlsx]

## Sheet: A
Time (minutes)	PBS							5-FU
1.34992	0.746141	2.89343	3.26989	2.19293	3.67574	2.80564	4.82523	7.84888	4.08733	4.56033	4.82994	3.18582	4.39716
8.02387	1.79957	3.36636	3.41007	2.49199	3.23165	3.37446	2.85392	7.37341	5.73717	4.87209	4.70262	3.53586	4.39232
14.6887	1.21352	2.57421	2.68807	1.94477	2.1503	2.58275	2.17364	5.37616	4.24714	3.93487	4.02092	3.1218	3.86308
21.4464	4.34779	5.85564	5.32919	5.15186	5.45517	5.74316	5.32869	9.78435	9.24854	8.271	8.93463	7.40198	8.65658
28.1318	3.65679	5.58085	4.49009	4.84894	5.14895	5.16253	5.10502	9.13104	8.56521	8.22519	8.56121	7.65945	9.05685
34.8092	3.74234	5.60341	4.69707	-0.10094	4.90564	4.89587	4.90438	9.71274	9.51051	8.79917	9.3238	7.79174	9.06268
41.5309	4.79295	6.15842	5.79422	4.48027	6.09332	5.07099	5.90346	10.6111	9.79819	8.94107	10.3175	9.12698	9.39643
48.1741	4.03806	5.52375	5.44729	5.26226	5.83251	5.70141	5.02966	10.8935	10.0005	9.68346	10.7771	9.16789	10.0449
54.8689	4.71132	6.14016	4.89301	4.651	5.58544	5.47943	4.90733	10.7358	10.1104	9.41762	10.3335	9.22167	9.58321
61.651	3.44335	5.18583	4.07964	3.24432	5.19746	4.63106	3.89983	9.82706	8.8594	8.32326	8.60197	8.18519	8.52656
68.3403	3.8086	5.43717	4.56566	4.57592	5.06446	4.33135	4.17467	9.62689	8.68918	8.46561	8.93027	8.19772	8.54476
75.0395	3.86043	5.27473	5.33336	4.0912	4.87545	5.04265	4.39016	9.7695	9.23225	8.71562	8.87417	8.5299	8.74441
81.8315	-0.062284	0.584457	1.53959	0.371027	0.993915	0.791814	0.194527	1.84642	0.588876	1.31013	0.730805	1.01172	1.00215
88.5246	0.400705	1.11548	1.28919	1.03971	1.17259	0.899977	0.882974	1.40234	1.32733	1.36637	1.22771	0.777767	0.763441
95.2321	-0.020837	1.04994	2.04179	1.89669	0.815984	0.717171	0.369436	2.14601	0.786104	1.54582	1.39726	1.20193	1.06088

## Sheet: B
Time (minutes)	PBS							5-FU
1.34992	19.3695	36.0091	22.9328	17.3707	13.8998	16.8069	7.8215	17.4796	24.5336	24.0739	26.0072	23.7161	22.0981
8.02387	20.5033	32.6306	22.4512	15.972	9.54838	13.7006	7.04969	33.5628	21.8632	21.074	21.5229	17.3581	17.1572
14.6887	23.0965	32.2766	19.245	16.4832	10.0232	21.8878	5.92475	34.8406	23.8939	22.1377	18.8138	14.3496	14.7547
21.4464	28.4896	17.487	20.2892	0.424627	6.71774	7.85541	12.4057	-7.80856	3.41676	7.64629	1.7786	-7.39805	-2.27071
28.1318	24.8001	20.1131	19.1148	1.56437	7.97541	8.5349	11.1607	-8.62301	4.7042	5.96889	2.40195	-7.43386	-2.36772
34.8092	21.3075	20.2687	16.4983	3.09342	8.36308	8.5347	12.9842	-8.17258	4.30671	4.73578	2.9749	-6.2157	-3.43467
41.5309	12.3301	25.1045	23.5919	7.587	14.985	25.1431	3.07177	9.0917	19.031	10.3283	21.7181	8.95914	17.7583
48.1741	11.658	21.4369	21.4801	5.23543	13.3816	25.9624	3.62236	5.76168	14.5598	5.11206	18.5751	7.22517	14.3572
54.8689	13.9264	20.7504	19.7714	5.19976	14.0716	31.0824	4.69233	9.66849	13.4194	4.15561	17.1315	6.37003	13.4058
61.651	4.0821	13.5484	11.5257	-3.09778	0.965145	16.7711	-11.5186	-8.04296	-2.42965	-10.2382	0.27177	-11.463	-9.64735
68.3403	3.30138	11.4166	9.41994	-3.92146	-0.32202	11.134	-12.3663	-11.7722	-3.93777	-12.2532	-0.161652	-14.1492	-10.979
75.0395	3.67809	11.0022	8.91235	-4.48807	1.47443	9.20439	-11.0461	-11.2278	-2.3479	-12.5226	0.999727	-13.8321	-11.8624
81.8315	2.34031	11.5163	8.37252	-1.27357	1.6391	9.22397	-15.636	-9.48579	-0.516628	-11.6071	2.92218	-13.2077	3.15182
88.5246	-8.19461	1.79367	-2.39442	-12.6661	-9.12883	-2.2969	-25.937	-21.0706	-10.7408	-21.5556	-8.06231	-25.5894	-8.24192
95.2321	-2.74678	10.3246	5.64889	-3.22681	-0.653773	6.23756	-17.1652	-13.4484	-1.00012	-13.2478	-0.273511	-16.7524	0.186651

## Sheet: C
Time (minutes)	HSC			MyP
1.34992	5.20126	4.26759	4.99221	7.78933	8.40725	7.72846	7.83246	7.77605	6.1372	5.10624	7.39555	6.86052	5.16909
8.02387	5.02582	4.16682	5.17758	7.2991	7.36286	7.13684	5.81038	7.26947	5.2566	4.19531	6.26773	6.17535	5.2362
14.6887	4.861	3.6461	4.65403	5.55027	6.53164	6.35963	4.22346	6.57856	4.98213	3.9359	5.49552	5.54164	5.52126
21.4464	7.65438	5.72697	6.98705	4.01482	4.89256	4.70114	3.09226	4.80162	4.97775	3.85858	4.48327	5.37441	4.63275
28.1318	6.1423	5.66548	6.10611	4.64041	5.68817	5.38645	3.48428	5.56087	4.12023	3.16938	4.02193	4.35774	4.09819
34.8092	7.40183	7.04716	7.41878	4.36393	5.36263	5.88063	3.46775	5.94278	4.4985	3.59744	4.51519	4.94506	4.90709
41.5309	9.43528	10.6038	10.0112	5.43308	8.30326	8.49963	6.13882	8.22122	8.16126	6.22532	7.87736	8.13935	7.64463
48.1741	8.71995	10.1191	9.58914	5.8447	8.38769	8.98168	6.38078	8.71051	6.98232	5.85105	7.79661	7.71056	7.32013
54.8689	9.03995	9.71143	9.22795	5.73374	8.27801	8.99997	6.3171	8.82569	6.68468	5.62329	6.78956	7.20543	6.96245
61.651	8.69041	6.80263	8.50938	3.2141	4.53198	4.99521	2.528	5.11245	4.05715	3.49992	3.36458	4.50121	4.32289
68.3403	8.64949	9.2065	8.96012	3.29414	4.49351	5.22863	3.26132	5.41033	4.04253	3.12821	-2.32849	4.35181	4.01252
75.0395	8.7248	9.69233	9.09191	3.55518	5.09441	5.11554	3.22379	5.56486	3.92322	4.00633	5.50211	4.23249	4.35038
81.8315	1.95725	2.75946	2.32855	0.118989	0.665669	1.14288	-0.094153	1.36254	0.866287	1.13275	1.20107	1.31332	1.41667
88.5246	0.864709	1.25718	1.03414	-0.636251	0.304241	0.775383	-0.680828	0.314366	-0.67434	-0.680319	-0.539295	-5.16969	0.270015
95.2321	2.16443	3.63138	2.87398	0.694648	1.08204	1.85904	0.02371	1.32321	0.881782	0.371108	0.971113	0.392959	1.53207

## Sheet: D
Time (minutes)	HSC			MyP
1.34992	27.9834	44.3985	20.7725	69.7588	37.6341	41.2186	41.6549	56.9955	44.1443	34.0547	44.1528	38.4362	66.2074
8.02387	25.3297	35.8363	20.0266	62.7085	42.4511	35.7636	39.8634	55.3104	42.9367	29.6179	45.3363	31.7089	63.637
14.6887	22.4765	31.8456	20.5943	59.5602	40.5233	34.0092	38.6344	45.6411	39.5378	28.3733	44.3322	29.2939	55.1015
21.4464	3.99273	14.6062	11.1764	37.2753	12.8947	5.13856	10.7893	33.6824	9.11627	7.98354	14.8595	10.5605	31.377
28.1318	6.4261	14.5325	12.3263	35.573	14.6379	6.3249	13.4879	26.993	13.2435	7.65754	15.2685	12.2426	31.3265
34.8092	10.6239	13.7389	13.5515	34.9597	11.5547	7.7568	14.0243	29.4667	15.0065	7.06984	16.0729	13.8668	28.5171
41.5309	27.1737	29.5013	25.0808	40.4385	27.9535	32.2534	33.1614	39.9584	34.0099	21.5796	32.3125	28.6018	35.0166
48.1741	25.5084	26.1422	23.3428	39.7673	25.7843	27.5525	31.9976	40.625	30.905	18.5574	28.9604	25.7338	32.9185
54.8689	26.7269	23.7841	22.9991	37.6202	24.3199	25.1967	32.0867	40.5698	28.9299	18.2317	28.4645	25.5844	30.9673
61.651	8.55445	8.36323	-0.921978	21.7318	3.45128	-4.99719	7.6901	25.2863	5.48571	-0.191711	5.78636	2.77949	13.0033
68.3403	8.2931	6.07549	-2.85031	15.5027	4.08563	-4.66226	6.52675	23.1069	4.20822	-1.70672	3.6979	0.778617	14.0207
75.0395	10.7955	4.28776	-2.36483	15.1608	4.23927	-5.07589	5.12989	21.6511	3.65879	-2.77905	6.42307	0.047293	12.9251
81.8315	11.0713	4.19318	-2.01425	14.8098	-0.536122	-9.56845	6.51528	21.4116	11.3428	0.718594	-5.98519	2.44901	4.54869
88.5246	12.6888	4.13988	-1.44749	12.401	3.89176	-10.3602	6.7025	21.2207	7.63296	1.2154	-5.15884	2.68374	7.75414
95.2321	11.95	1.59216	-4.70702	10.7112	-2.57286	-13.3067	3.08571	17.4412	4.11746	4.60978	-8.29978	-0.929987	5.37326
