# Supplementary material for: Context-dependent modification of PFKFB3 in hematopoietic stem cells promotes anaerobic glycolysis and ensures stress hematopoiesis
Source: eLife. 2024 Apr 4;12:RP87674. doi: 10.7554/eLife.87674 (PMC10994660; doi:10.7554/eLife.87674)
Supplement: Figure 1—source data 1. [file elife-87674-fig1-data1.xlsx]

## Sheet: Figure 1B
Metabolites	PBS			5-FU
G6P	4.25068e-08	4.32023e-08	3.7923e-08	5.37613e-08	3.30979e-08	5.99429e-08
F6P	1.05e-06	7.6e-07	7.48e-07	1.06e-06	9.05e-07	9.52e-07
F1,6BP	3.11e-07	2.2e-07	2.19e-07	1.24e-06	6.52e-07	1.01e-06
G3P+DHAP	1.94e-07	1.59e-07	1.49e-07	8.75e-07	4.44e-07	6.83e-07
3PG+2PG	8.47e-08	6.86e-08	4.4e-08	1.26e-07	8.21e-08	1.2e-07
PEP	6.51e-08	4.55e-08	4.09e-08	8.53e-08	6.47e-08	7.74e-08
PYR	2.54e-08	4.94e-08	9.15e-09	1.1e-07	1.54e-08	6.31e-08
LAC	3.12e-07	2.63e-07	3.71e-07	5.97e-07	4.74e-07	5.34e-07
CIT	2.68792e-07	2.04208e-07	3.6944e-07	3.6653e-07	2.61711e-07	2.61433e-07
ACO	7.28e-09	2.95e-09	5.68e-09	6e-09	4.8e-09	4.81e-09
2OG	2.2e-08	3.18e-08	1.23e-08	3.9e-08	1.9e-08	3.19e-08
SUC	3.7e-08	4.08e-08	8.46e-08	8.7e-08	7.54e-08	5.9e-08
FUM	2.19e-09	1.15e-09	1.89e-09	1.57e-09	2.71e-09	2.16e-09
MAL	6.39e-08	4.93e-08	5.71e-08	8.18e-08	6.63e-08	7.32e-08
OAA	0	0	0	0	0	0
6PG	3.73e-08	7.03e-08	8.71e-08	8.36e-08	7.51e-08	1.44e-07
Ru5P+Xu5P+R5P	5.74e-08	9.79e-08	4.03e-08	2.05e-07	1.21e-07	1.96e-07
S7P	9.75e-08	8.05e-08	5.83e-08	7.6e-08	5.79e-08	8.13e-08
PRPP	6.47994e-07	5.62603e-07	1.57315e-07	7.93093e-07	7.93632e-07	8.57309e-07
IMP	2.91887e-10	2.27307e-10	0	1.4014e-09	9.32371e-10	9.32349e-10
ATP	7.34332e-08	5.58779e-08	2.43754e-08	1.02064e-07	7.44626e-08	9.49918e-08
GTP	2.66e-08	2.14e-08	3.7e-09	4.21e-08	2.21e-08	4.19e-08
UTP	1.19e-08	9.14e-09	6.78e-10	1.89e-08	1.43e-08	2.26e-08
TTP	0	0	0	0	0	0

## Sheet: Figure 1C
PBS	5-FU
2.08267	4.153
1.60893	2.67104
1.61983	3.50415

## Sheet: Figure 1D
PBS	5-FU
0.765723	0.982205
0.590289	0.866288
0.988084	0.733187

## Sheet: Figure 1E
PBS	5-FU
122.01	149.604
86.0093	414.016
0.343044	165.28

## Sheet: Figure 1F
PBS	5-FU
0.111965	0.163117
0.0864154	0.11086
0.0287538	0.15951

## Sheet: Figure 1G
PBS	5-FU	PBS (oligomycin+)	5-FU (oligomycin+)
1.21352	5.37616	4.34779	9.78435
2.57421	4.24714	5.85564	9.24854
2.68807	3.93487	5.32919	8.271
1.94477	4.02092	5.15186	8.93463
2.1503	3.1218	5.45517	7.40198
2.58275	3.86308	5.74316	8.65658
2.17364		5.32869

## Sheet: Figure 1H
PBS	5-FU	PBS (oligomycin+)	5-FU (oligomycin+)
23.0965	34.8406	28.4896	-7.80856
32.2766	23.8939	17.487	3.41676
19.245	22.1377	20.2892	7.64629
16.4832	18.8138	0.424627	1.7786
10.0232	14.3496	6.71774	-7.39805
21.8878	14.7547	7.85541	-2.27071
5.92475		12.4057

## Sheet: Figure 1K
Cell fraction	PBS				5-FU
MyP	93.4	88.8	88.8	88.5	91.3	66.7	91.7
MPP3	93.4	87.9	88.2	80.7	93.9	95.1	93.6
MPP2	93.3	84.6	92.9	79.5	95.6	96.8	94.7
MPP1	57.6	38.5	42.4	30.6	56.1	60.5	56.6
HSC	51.6	34.5	41.3	29.5	68.8	63.4	61.1

## Sheet: Figure 1L
	PBS				5-FU
EPCR+	29.2	20.5	29.3	11.5	74.5	62.8	59
EPCR-	59.2	40.6	47.6	34.7	62.7	63.9	63.4
