# Supplementary material for: Context-dependent modification of PFKFB3 in hematopoietic stem cells promotes anaerobic glycolysis and ensures stress hematopoiesis
Source: eLife. 2024 Apr 4;12:RP87674. doi: 10.7554/eLife.87674 (PMC10994660; doi:10.7554/eLife.87674)
Supplement: Figure 2—source data 1. [file elife-87674-fig2-data1.xlsx]

## Sheet: Figure 2B
	DMSO				Oligo
G6P	9.75e-09	8.44e-09	1.22e-08	2.24e-08	1.24e-09	2.14e-09	2.72e-09	4.95e-09
F6P	1.03e-07	0	1.91e-07	3.4e-07	8.09e-08	3.84e-08	6.18e-08	9.6e-08
F1,6BP	5.78e-07	7.46e-07	9.66e-07	9.72e-07	1.06e-06	5.41e-07	9.42e-07	1.56e-06
G3P+DHAP	3.1e-07	3.66e-07	4.68e-07	4.99e-07	5.17e-07	2.45e-07	4.44e-07	7.21e-07
3PG+2PG	8.11e-08	1.11e-07	1.04e-07	2.19e-07	3.44e-07	6.49e-07	6.89e-07	1.13e-06
PEP	2.49e-08	9.33e-09	1.5e-08	3.32e-08	2.95e-08	1.25e-08	1.88e-08	3.63e-08
PYR	3.35e-08	7.37e-09	1.39e-08	1.29e-08	2.72e-08	4.6e-09	1.22e-08	1.46e-08
LAC	2.77e-07	1.69e-07	2.06e-07	1.97e-07	4.44e-07	2.25e-07	2.93e-07	3.36e-07
CIT	4.20531e-07	1.23952e-07	2.29581e-07	1.79165e-07	4.5738e-07	1.84056e-07	2.09705e-07	2.30232e-07
ACO	6.87e-09	1.5e-09	4.69e-09	3.59e-09	8.86e-09	4.09e-09	3.44e-09	4.36e-09
2OG	5.79e-09	0	2.04e-09	5.02e-09	1.3e-09	0	0	6.73e-10
SUC	3.35e-07	7.9e-08	1.9e-07	1.69e-07	3.37e-07	1.23e-07	1.65e-07	2.24e-07
FUM	1.89e-09	1.32e-10	2.72e-09	2.61e-09	5.16e-09	1.02e-09	9.88e-10	1.98e-09
MAL	4.28e-08	1.69e-08	3.5e-08	2.89e-08	4.69e-08	2.13e-08	3.13e-08	3.52e-08
OAA	0	0	0	0	0	0	0	0
6PG	1.15e-07	1.66e-07	2.28e-07	2.23e-07	9.11e-08	1.59e-07	2.36e-07	4.14e-07
Ru5P+Xu5P+R5P	3.86e-08	2.94e-08	9.22e-08	5.28e-08	2.8e-08	3.64e-08	8.41e-08	7.35e-08
S7P	2.06e-08	1.19e-08	4.4e-08	2.97e-08	1.21e-08	3.19e-08	5.13e-08	4.08e-08
PRPP	0	0	0	0	0	0	0	1.07e-09
IMP	0	5.91137e-09	4.07652e-09	1.23043e-08	1.19697e-08	9.49302e-09	1.44515e-08	1.42193e-08
ATP	2.73381e-09	1.21202e-09	1.92885e-09	5.52929e-09	0	0	0	0
GTP	0	0	0	0	0	0	0	0
UTP	3.16e-09	0	0	0	0	0	0	0
TTP	0	0	0	0	0	0	0	0

## Sheet: Figure 2C
DMSO	Oligo
1	1.76892
1	1.21118
1	1.246
1	1.69532

## Sheet: Figure 2D
DMSO	Oligo
1	1.08597
1	1.50178
1	0.889929
1	1.29105

## Sheet: Figure 2E
DMSO	Oligo
1	3.09211
1	0.491741
1	0.576271
1	1.03418

## Sheet: Figure 2F
DMSO	Oligo
1	0
1	0
1	0
1	0

## Sheet: Figure 2G
HSC (oligomycin-)	HSC (oligomycin+)	MyP (oligomycin-)	MyP (oligomycin+)
5.20126	7.65438	7.78933	4.01482
4.26759	5.72697	8.40725	4.89256
4.99221	6.98705	7.72846	4.70114
		7.83246	3.09226
		7.77605	4.80162
		6.1372	4.97775
		5.10624	3.85858
		7.39555	4.48327
		6.86052	5.37441
		5.16909	4.63275

## Sheet: Figure 2H
HSC (oligomycin-)	HSC (oligomycin+)	MyP (oligomycin-)	MyP (oligomycin+)
27.9834	3.99273	69.7588	37.2753
44.3985	14.6062	37.6341	12.8947
20.7725	11.1764	41.2186	5.13856
		41.6549	10.7893
		56.9955	33.6824
		44.1443	9.11627
		34.0547	7.98354
		44.1528	14.8595
		38.4362	10.5605
		66.2074	31.377
