# Supplementary material for: Context-dependent modification of PFKFB3 in hematopoietic stem cells promotes anaerobic glycolysis and ensures stress hematopoiesis
Source: eLife. 2024 Apr 4;12:RP87674. doi: 10.7554/eLife.87674 (PMC10994660; doi:10.7554/eLife.87674)
Supplement: Figure 3—figure supplement 1—source data 1. [file elife-87674-fig3-figsupp1-data1.xlsx]

## Sheet: D
PBS	5-FU
60.2228	87.0918
49.4801	85.2337
47.7247	85.5265
46.6516	90.0384
54.6067	89.3243
57.9856	83.8639
54.5263	88.8175
49.6956	84.7379
55.0957	83.3204
47.5763	87.5165
51.1309	85.8542
46.7146	82.5809
61.0355	90.2563
51.2918	82.813
50.4261	90.6018
47.7342	90.7034
58.7803	89.395
56.7236	90.6585
57.0133	80.7979
48.5414	90.8435
59.1782	87.6831
59.1654	84.0449
68.4225	79.625
47.8685	79.3576
81.2577	83.5511
53.949	83.3123
67.866	78.1166
74.0057	89.4162
76.9113	77.3829
44.3531	76.9795
47.2358	87.878
56.6233	74.6456
76.8837	74.4634
49.0127	73.9797
74.2638	74.296
48.3973	73.892
81.1274	73.7071
74.7256	73.4384
83.1349	73.4227
87.2303	73.7048
74.7234	73.3636
73.373	73.1957
51.7833	73.0429
75.4195	73.331
83.0909	72.9554
74.5787	72.6655
50.2841	83.6874
47.1539	72.6801
55.4634	72.4934
51.4842	72.4394
57.2564	72.5186
56.8716	72.4251
47.4434	82.9542
89.6933	72.3221
74.9108	72.3465
38.5862	72.5127
75.2217	72.2151
83.4599	72.4134
55.4541	72.1969
38.6381	72.2152
38.1362	72.0865
39.7751	72.8192
61.6822	71.9179
61.563	71.8672
44.5417	71.8109
46.6216	71.8115
37.6398	71.855
37.4195	71.7843
47.9586	71.8209
40.1764	71.7265
36.6532	72.6588
36.831	71.8323
36.14	71.7449
41.9932	71.5621
36.0064	71.5576
35.4316	71.6732
35.4071	71.3805
35.274	71.2733
35.4603	70.996
38.2642	77.3675
34.9144	71.5067
37.4818	70.996
34.9119	70.996
34.6216	70.996
34.4514	70.996
34.3353	71.1148
33.698	71.6885
39.2505	70.996
33.4641	71.7739
33.6072	70.996
33.4641	71.65
33.4641	71.5639
33.4641	70.996
33.4641	70.996
33.6643	71.5348
33.4641	70.9975
33.4641	71.032
34.2375	71.2527
33.4641	71.0554
34.647	71.6726

## Sheet: E
PBS	5-FU
78.8582	87.8145
75.2773	87.1952
74.6922	87.2928
74.3345	88.7967
76.9862	88.5587
78.1124	86.7386
76.9594	88.3898
75.3491	87.0299
77.1492	86.5574
74.6427	87.9561
75.8276	87.402
74.3555	86.3109
79.1291	88.8694
75.8812	86.3883
75.5926	88.9845
74.6953	89.0184
78.3774	88.5823
77.6918	89.0034
77.7884	85.7166
74.9644	89.0593
78.51	88.0095
78.5057	86.7985
81.5914	85.3256
74.7401	85.2365
85.8698	86.6339
76.7669	86.5537
81.4059	84.8228
83.4525	88.5893
84.421	84.5782
73.5683	84.4437
74.5292	88.0719
77.6464	83.6658
84.4118	83.6051
75.1215	83.4438
83.5385	83.5493
74.9164	83.4146
85.8264	83.353
83.6925	83.2634
86.4956	83.2582
87.8607	83.3522
83.6891	83.2385
83.2416	83.1825
76.045	83.1316
83.9237	83.2276
86.4809	83.1024
83.6435	83.0058
75.5453	86.6797
74.5019	83.0106
77.2691	82.9484
75.9453	82.9304
77.8694	82.9568
77.7406	82.9256
74.5786	86.4353
88.6787	82.8913
83.7542	82.8994
71.646	82.9548
83.8446	82.8556
86.6038	82.9217
77.2681	82.8496
71.6633	82.8557
71.496	82.8128
72.0423	83.0469
79.3446	82.7566
79.2835	82.7397
73.6312	82.7209
74.3214	82.7211
71.3305	82.7356
71.2571	82.712
74.7701	82.7242
72.1761	82.6928
71.0017	83.0035
71.061	82.728
70.8306	82.6989
72.7812	82.638
70.7861	82.6364
70.5944	82.675
70.5863	82.5774
70.5419	82.5417
70.604	82.4493
71.5387	84.5731
70.4221	82.6195
71.2779	82.4493
70.4212	82.4493
70.3245	82.4493
70.2677	82.4493
70.229	82.4888
70.0166	82.6801
71.8675	82.4493
69.9386	82.7086
69.9863	82.4493
69.9386	82.6672
69.9386	82.634
69.9386	82.4493
69.9386	82.4493
70.0054	82.6289
69.9386	82.4498
69.9386	82.4609
70.1964	82.5348
69.9386	82.4691
70.3286	82.6748

## Sheet: F
PBS	5-FU
167.605	176.561
164.024	175.942
163.439	176.04
163.081	177.544
165.733	177.306
166.859	175.486
165.706	177.137
164.096	175.777
165.896	175.304
163.39	176.703
164.575	176.149
163.102	175.058
167.876	177.616
164.628	175.135
164.339	177.731
163.442	177.765
167.124	177.329
166.439	177.75
166.535	174.464
163.711	177.806
167.257	176.756
167.253	175.545
170.338	174.072
163.487	173.983
174.617	175.381
165.514	175.301
170.153	173.57
172.199	177.336
173.168	173.325
162.315	173.191
163.276	176.819
166.393	172.413
173.159	172.352
163.868	172.191
172.285	172.296
163.663	172.161
174.573	172.1
172.439	172.01
175.243	172.005
176.608	172.099
172.436	171.985
171.988	171.929
164.792	171.879
172.671	171.975
175.228	171.849
172.39	171.753
164.292	175.427
163.249	171.757
166.016	171.695
164.692	171.677
166.616	171.704
166.488	171.673
163.326	175.182
177.426	171.638
172.501	171.646
160.393	171.702
172.591	171.602
175.351	171.669
166.015	171.596
160.41	171.603
160.243	171.56
160.789	171.794
168.091	171.504
168.03	171.487
162.378	171.468
163.068	171.468
160.077	171.482
160.004	171.459
163.517	171.471
160.923	171.44
159.749	171.75
159.808	171.475
159.577	171.446
161.528	171.385
159.533	171.383
159.341	171.422
159.333	171.324
159.289	171.289
159.351	171.196
160.286	173.32
159.169	171.366
160.025	171.196
159.168	171.196
159.071	171.196
159.015	171.196
158.976	171.236
158.763	171.427
160.614	171.196
158.685	171.456
158.733	171.196
158.685	171.414
158.685	171.381
158.685	171.196
158.685	171.196
158.752	171.376
158.685	171.197
158.685	171.208
158.943	171.282
158.685	171.216
159.076	171.422

## Sheet: G
PBS	5-FU
158.024	166.98
154.443	166.361
153.858	166.458
153.5	167.962
156.152	167.724
157.278	165.904
156.125	167.555
154.515	166.195
156.315	165.723
153.808	167.122
154.993	166.567
153.521	165.476
158.295	168.035
155.047	165.554
154.758	168.15
153.861	168.184
157.543	167.748
156.857	168.169
156.954	164.882
154.13	168.225
157.675	167.175
157.671	165.964
160.757	164.491
153.906	164.402
165.035	165.799
155.933	165.719
160.571	163.988
162.618	167.755
163.587	163.744
152.734	163.609
153.695	167.238
156.812	162.831
163.577	162.771
154.287	162.609
162.704	162.715
154.082	162.58
164.992	162.518
162.858	162.429
165.661	162.424
167.026	162.518
162.855	162.404
162.407	162.348
155.21	162.297
163.089	162.393
165.646	162.268
162.809	162.171
154.711	165.845
153.667	162.176
156.435	162.114
155.111	162.096
157.035	162.122
156.906	162.091
153.744	165.601
167.844	162.057
162.92	162.065
150.811	162.12
163.01	162.021
165.769	162.087
156.434	162.015
150.829	162.021
150.661	161.978
151.208	162.213
158.51	161.922
158.449	161.905
152.797	161.886
153.487	161.887
150.496	161.901
150.423	161.878
153.936	161.89
151.342	161.858
150.167	162.169
150.226	161.894
149.996	161.864
151.947	161.804
149.952	161.802
149.76	161.84
149.752	161.743
149.707	161.707
149.77	161.615
150.704	163.739
149.588	161.785
150.443	161.615
149.587	161.615
149.49	161.615
149.433	161.615
149.395	161.654
149.182	161.846
151.033	161.615
149.104	161.874
149.152	161.615
149.104	161.833
149.104	161.8
149.104	161.615
149.104	161.615
149.171	161.794
149.104	161.615
149.104	161.626
149.362	161.7
149.104	161.635
149.494	161.84

## Sheet: H
PBS	5-FU
129.626	138.582
126.045	137.963
125.46	138.061
125.102	139.565
127.754	139.327
128.88	137.506
127.727	139.158
126.117	137.798
127.917	137.325
125.41	138.724
126.595	138.17
125.123	137.079
129.897	139.637
126.649	137.156
126.361	139.752
125.463	139.786
129.145	139.35
128.46	139.771
128.556	136.484
125.732	139.827
129.278	138.777
129.274	137.566
132.359	136.093
125.508	136.004
136.638	137.402
127.535	137.322
132.174	135.591
134.22	139.357
135.189	135.346
124.336	135.212
125.297	138.84
128.414	134.434
135.18	134.373
125.889	134.212
134.306	134.317
125.684	134.182
136.594	134.121
134.46	134.031
137.263	134.026
138.629	134.12
134.457	134.006
134.009	133.95
126.813	133.899
134.692	133.995
137.249	133.87
134.411	133.774
126.313	137.447
125.27	133.779
128.037	133.716
126.713	133.698
128.637	133.725
128.508	133.694
125.347	137.203
139.446	133.659
134.522	133.667
122.414	133.723
134.613	133.624
137.372	133.69
128.036	133.617
122.431	133.624
122.264	133.581
122.81	133.815
130.112	133.524
130.051	133.507
124.399	133.489
125.089	133.489
122.098	133.503
122.025	133.48
125.538	133.492
122.944	133.461
121.769	133.771
121.829	133.496
121.598	133.467
123.549	133.406
121.554	133.404
121.362	133.443
121.354	133.345
121.31	133.31
121.372	133.217
122.306	135.341
121.19	133.387
122.046	133.217
121.189	133.217
121.092	133.217
121.036	133.217
120.997	133.257
120.784	133.448
122.635	133.217
120.707	133.476
120.754	133.217
120.707	133.435
120.707	133.402
120.707	133.217
120.707	133.217
120.773	133.397
120.707	133.218
120.707	133.229
120.964	133.303
120.707	133.237
121.096	133.443

## Sheet: I
PBS	5-FU
16.699	13.1447
13.1182	12.5254
12.533	12.623
12.1753	14.1269
14.827	13.8889
15.9533	12.0688
14.8002	13.72
13.19	12.3601
14.99	11.8876
12.4835	13.2863
13.6684	12.7322
12.1963	11.6411
16.9699	14.1996
13.7221	11.7185
13.4335	14.3147
12.5362	14.3486
16.2182	13.9125
15.5327	14.3337
15.6292	11.0468
12.8053	14.3982
16.3509	13.3429
16.3466	12.1293
19.4323	10.6558
12.5809	10.5667
23.7107	11.9647
14.6078	11.8854
19.2468	10.153
21.2934	13.9195
22.2619	9.90844
11.4092	9.77396
12.3701	13.4091
15.5052	8.99601
22.2527	8.93526
12.9624	8.77402
21.3794	8.87949
12.7572	8.74482
23.6672	8.68317
21.5333	8.59361
24.3364	8.58839
25.7016	8.6824
21.5339	8.56868
21.0825	8.5127
13.8859	8.46176
21.7646	8.5578
24.3218	8.43261
21.4843	8.33598
13.3862	12.01
12.3428	8.34084
15.1139	8.27862
13.7862	8.2606
15.7103	8.28701
15.5823	8.25583
12.4491	11.7655
26.5241	8.22151
21.5951	8.22963
9.48685	8.28504
21.7053	8.18586
24.4448	8.25194
15.1097	8.17978
9.50416	8.18588
9.33686	8.14298
9.88316	8.39224
17.1856	8.08678
17.1565	8.06989
11.472	8.0511
12.1668	8.05129
9.1714	8.06579
9.09796	8.04224
12.611	8.05446
10.0169	8.02298
8.84252	8.33373
8.9018	8.05825
8.67147	8.0291
10.6228	7.96818
8.62692	7.96666
8.43531	8.00519
8.42715	7.90764
8.38278	7.87192
8.44488	7.77948
9.37951	9.90331
8.26293	7.9497
9.11872	7.77948
8.26209	7.77948
8.16533	7.77948
8.10858	7.77948
8.06989	7.81907
7.85747	8.01032
9.7083	7.77948
7.77948	8.03876
7.82721	7.77948
7.77948	7.99746
7.77948	7.97104
7.77948	7.77948
7.77948	7.77948
7.84621	7.95907
7.77948	7.77999
7.77948	7.79163
8.03729	7.86503
7.77948	7.79927
8.17595	8.00501

## Sheet: J
PBS	5-FU
16.699	13.1447
13.1182	12.5254
12.533	12.623
12.1753	14.1269
14.827	13.8889
15.9533	12.0688
14.8002	13.72
13.19	12.3601
14.99	11.8876
12.4835	13.2863
13.6684	12.7322
12.1963	11.6411
16.9699	14.1996
13.7221	11.7185
13.4335	14.3147
12.5362	14.3486
16.2182	13.9125
15.5327	14.3337
15.6292	11.0468
12.8053	14.3982
16.3509	13.3429
16.3466	12.1293
19.4323	10.6558
12.5809	10.5667
23.7107	11.9647
14.6078	11.8854
19.2468	10.153
21.2934	13.9195
22.2619	9.90844
11.4092	9.77396
12.3701	13.4091
15.5052	8.99601
22.2527	8.93526
12.9624	8.77402
21.3794	8.87949
12.7572	8.74482
23.6672	8.68317
21.5333	8.59361
24.3364	8.58839
25.7016	8.6824
21.5339	8.56868
21.0825	8.5127
13.8859	8.46176
21.7646	8.5578
24.3218	8.43261
21.4843	8.33598
13.3862	12.01
12.3428	8.34084
15.1139	8.27862
13.7862	8.2606
15.7103	8.28701
15.5823	8.25583
12.4491	11.7655
26.5241	8.22151
21.5951	8.22963
9.48685	8.28504
21.7053	8.18586
24.4448	8.25194
15.1097	8.17978
9.50416	8.18588
9.33686	8.14298
9.88316	8.39224
17.1856	8.08678
17.1565	8.06989
11.472	8.0511
12.1668	8.05129
9.1714	8.06579
9.09796	8.04224
12.611	8.05446
10.0169	8.02298
8.84252	8.33373
8.9018	8.05825
8.67147	8.0291
10.6228	7.96818
8.62692	7.96666
8.43531	8.00519
8.42715	7.90764
8.38278	7.87192
8.44488	7.77948
9.37951	9.90331
8.26293	7.9497
9.11872	7.77948
8.26209	7.77948
8.16533	7.77948
8.10858	7.77948
8.06989	7.81907
7.85747	8.01032
9.7083	7.77948
7.77948	8.03876
7.82721	7.77948
7.77948	7.99746
7.77948	7.97104
7.77948	7.77948
7.77948	7.77948
7.84621	7.95907
7.77948	7.77999
7.77948	7.79163
8.03729	7.86503
7.77948	7.79927
8.17595	8.00501

## Sheet: K
PBS	5-FU
8.91957	5.36526
5.33869	4.74589
4.75354	4.8435
4.39583	6.34745
7.04755	6.10941
8.17383	4.28929
7.02075	5.9405
5.41052	4.58062
7.21055	4.10814
4.70407	5.50683
5.88894	4.95272
4.41684	3.86164
9.19046	6.42011
5.94259	3.93899
5.65402	6.53526
4.7567	6.56913
8.43875	6.13298
7.75319	6.55417
7.84976	3.26729
5.02579	6.61874
8.57137	5.56342
8.5671	4.34982
11.6528	2.87634
4.80147	2.78718
15.9312	4.18525
6.82831	4.10593
11.4673	2.37352
13.5139	6.14007
14.4824	2.12896
3.62969	1.99448
4.59057	5.62966
7.72572	1.21653
14.4732	1.15578
5.18287	0.994542
13.5999	1.10001
4.97776	0.965344
15.8878	0.903692
13.7538	0.81413
16.557	0.808909
17.9221	0.902926
13.7544	0.789195
13.303	0.733215
6.1064	0.682282
13.9852	0.778319
16.5423	0.653131
13.7049	0.556498
5.60668	4.23049
4.56327	0.561361
7.33442	0.499143
6.0067	0.48112
7.9308	0.507532
7.80279	0.476348
4.66967	3.98605
18.7446	0.442028
13.8156	0.450151
1.70737	0.505562
13.9258	0.406378
16.6653	0.472463
7.33023	0.400298
1.72468	0.4064
1.55738	0.363499
2.10368	0.612758
9.40609	0.307299
9.37704	0.29041
3.69253	0.271624
4.38736	0.271813
1.39192	0.286309
1.31848	0.262762
4.83151	0.274978
2.23743	0.243496
1.06304	0.55425
1.12232	0.278768
0.891989	0.249617
2.8433	0.188702
0.847435	0.187177
0.655829	0.225713
0.647673	0.128161
0.6033	0.092439
0.665405	1.58e-08
1.60003	2.12383
0.483452	0.170225
1.33924	9.99e-09
0.482614	1.01e-08
0.385853	9.94e-09
0.329097	1e-08
0.29041	0.039591
0.077991	0.230839
1.92882	1.01e-08
1e-08	0.259284
0.047728	1e-08
1.01e-08	0.217982
1e-08	0.191559
1e-08	1e-08
9.99e-09	9.99e-09
0.066728	0.179588
9.98e-09	0.000507
9.98e-09	0.012149
0.25781	0.08555
1e-08	0.019792
0.396469	0.225533

## Sheet: L
PBS	5-FU
4.50273	0.948423
0.92185	0.329051
0.336697	0.426663
-0.02101	1.93061
2.63071	1.69257
3.75699	-0.12755
2.60391	1.52366
0.993675	0.163782
2.79371	-0.3087
0.287229	1.08999
1.4721	0.535884
1.16e-10	-0.5552
4.77362	2.00327
1.52575	-0.47785
1.23717	2.11842
0.339864	2.15229
4.02191	1.71614
3.33635	2.13733
3.43291	-1.14955
0.608954	2.2019
4.15454	1.14658
4.15026	-0.06703
7.23598	-1.5405
0.384626	-1.62966
11.5144	-0.23159
2.41147	-0.31091
7.05046	-2.04332
9.09703	1.72323
10.0656	-2.28788
-0.78715	-2.42236
0.173727	1.21282
3.30888	-3.20031
10.0564	-3.26106
0.766029	-3.4223
9.18307	-3.31683
0.560921	-3.4515
11.4709	-3.51315
9.33701	-3.60271
12.1401	-3.60793
13.5052	-3.51391
9.3376	-3.62764
8.88615	-3.68362
1.68956	-3.73456
9.56832	-3.63852
12.1254	-3.76371
9.28803	-3.86034
1.18984	-0.18635
0.146433	-3.85548
2.91758	-3.9177
1.58986	-3.93572
3.51396	-3.90931
3.38595	-3.94049
0.252827	-0.43079
14.3278	-3.97481
9.39875	-3.96669
-2.70947	-3.91128
9.50897	-4.01046
12.2484	-3.94438
2.91339	-4.01654
-2.69216	-4.01044
-2.85946	-4.05334
-2.31316	-3.80408
4.98925	-4.10954
4.9602	-4.12643
-0.72431	-4.14522
-0.02948	-4.14503
-3.02492	-4.13053
-3.09836	-4.15408
0.414673	-4.14186
-2.17941	-4.17334
-3.3538	-3.86259
-3.29452	-4.13807
-3.52485	-4.16722
-1.57354	-4.22814
-3.5694	-4.22966
-3.76101	-4.19113
-3.76917	-4.28868
-3.81354	-4.3244
-3.75143	-4.41684
-2.81681	-2.29301
-3.93339	-4.24661
-3.0776	-4.41684
-3.93423	-4.41684
-4.03099	-4.41684
-4.08774	-4.41684
-4.12643	-4.37725
-4.33885	-4.186
-2.48802	-4.41684
-4.41684	-4.15756
-4.36911	-4.41684
-4.41684	-4.19886
-4.41684	-4.22528
-4.41684	-4.41684
-4.41684	-4.41684
-4.35011	-4.23725
-4.41684	-4.41633
-4.41684	-4.40469
-4.15903	-4.33129
-4.41684	-4.39705
-4.02037	-4.19131

## Sheet: M
Vehicle	Oligomycin
84.9094	90.4344
85.3327	89.4356
87.3556	90.867
81.3824	90.867
82.3564	90.8669
88.7728	90.8651
81.1338	89.0493
90.867	90.8654
69.4203	90.6476
66.6962	89.1866
74.9736	90.8669
77.6957	90.7419
79.844	90.8669
71.7189	86.2615
63.3799	90.6074
87.1974	85.6583
74.4785	85.8357
78.4509	85.1687
62.1268	84.8472
81.7373	84.8736
81.0246	87.5598
69.0931	88.1108
69.0203	90.7265
84.3565	88.8389
75.8086	82.427
78.8888	82.4154
82.0739	82.2207
60.4028	81.9521
87.2839	81.8353
65.9427	82.2208
60.9559	81.5532
73.639	81.5481
80.9453	81.6452
59.3167	82.9924
60.5368	83.8433
58.4305	81.2705
79.7187	80.9323
82.6578	80.4659
57.0044	80.448
89.8125	80.1518
56.5542	80.3063
56.6867	82.8866
56.0907	80.2631
56.7929	79.9449
55.2189	80.348
54.5626	79.9092
55.1371	80.1971
54.7154	79.7892
60.5061	79.5891
57.0817	79.4361
52.9165	79.4366
52.5475	79.5006
54.563	79.6863
52.2181	79.4986
52.3357	79.5651
51.9103	79.4269
51.296	79.3324
50.9329	79.4138
85.6936	79.1789
50.8238	79.0891
50.6524	79.1102
50.7998	80.4531
50.3111	79.2227
50.5018	79.0265
50.3692	83.693
50.287	78.9421
50.0358	79.1453
49.9512	79.0282
49.9476	79.0439
50.1062	78.9322
49.4192	78.8246
50.5161	78.7322
49.1525	78.9243
48.9667	78.8631
48.6183	78.7333
54.5213	79.4808
55.075	78.6443
75.2998	78.4641
52.7534	90.867
52.8155	78.4641
51.2042	90.867
52.1245	78.4641
48.5403	78.4641
48.7168	78.6365
48.6512	78.4641
50.6105	78.4641
49.8269	78.4641
50.0352	78.4641
48.5333	78.4641
65.4637	78.4641
49.0403	78.4641
49.5826	78.9282
49.6646	79.0573
53.1639	78.4641
48.8564	78.4641
48.5266	78.9145
71.1877	78.7872
48.8111	78.608
50.3791	78.4732
49.4007	78.4641

[truncated: 8 more sheets: N, O, P, Q, R, S, T, U]
