# Supplementary material for: Context-dependent modification of PFKFB3 in hematopoietic stem cells promotes anaerobic glycolysis and ensures stress hematopoiesis
Source: eLife. 2024 Apr 4;12:RP87674. doi: 10.7554/eLife.87674 (PMC10994660; doi:10.7554/eLife.87674)
Supplement: Figure 3—figure supplement 2—source data 1. [file elife-87674-fig3-figsupp2-data1.xlsx]

## Sheet: B
	PBS				5-FU
G6P M+6	0	0	0	0	0	0	0	0
F6P M+6	0	0	0	0	0	0	0	0
F1,6BP M+6	0.857201	0	0	0	0	0	0	0
DHAP+G3P M+3	0.451443	0	1.37943	2.43844	1.36544	3.14144	1.39624	1.98162
2PG+3PG M+3	0	1.80129	1.64852	0	0.799905	0	1.14734	1.52713
PEP M+3	0	2.50472	3.91784	3.33903	2.39336	3.76418	2.79055	3.22878
PYR M+3	0	0	0	0	0	0.374757	0	0
LAC M+3	0.030097	0.020069	0.020474	0.019473	0.018217	0.018101	0.007527	0.022128

## Sheet: C
	PBS				5-FU
CIT M+2	0.778072	0.823387	0.747035	0.961442	0.818938	1.11875	0.969885	0.800249
ISOCIT M+2	0	3.44195	2.74675	0.408056	0.1994	0.611888	0.228454	0.269756
2OG M+2	0.400041	0.687622	0.549533	0.187874	0.180587	0.174432	0.233608	0
SUC M+2	0.903521	0.817573	1.14056	1.16432	1.06699	1.16873	1.10283	1.10185
FUM M+2	0	0.314494	0	0.527526	0.169406	0.263569	0.392609	0.323496
MAL M+2	0.991617	0.263146	0.830061	0.919679	0.984963	0.989669	1.02356	1.01989

## Sheet: D
	PBS				5-FU
6PG M+6	0	2.15925	0	0	0	0	0	0
PRPP M+5	0	N/A	0	0	0	0	0	0
R5P+Ru5P+Xu5P M+5	0	N/A	0	0	0	0	0	0
S7P M+7	0	0	N/A	0	0	0	0	0
IMP M+5	0	0	0	0	0.645964	1.01068	1.48792	0.597606
ATP M+5	0	0	0	0.244853	1.25175	1.14837	1.6166	1.5946
Glutathione (reduced) M+2	0.34694	0.280602	0.314949	0.540949	0.535119	0.694024	0.604944	0.702985
N/A means that no non-labeled bodies were detected and the label rate is not calculable

## Sheet: E
PBS	5-FU
0.065252	1.33847
0	1.07966
0.496686	0.808752
0.508737	0.992987

## Sheet: F
PBS	5-FU
0.794799	2.45379
0.658753	2.621
1.70502	1.31522
1.76617	2.2651

## Sheet: G
PBS	5-FU
0	0.564785
0	1.01486
0	1.80483
0	0.513203

## Sheet: H
PBS	5-FU
0	1.3813
0	1.21663
0	2.0665
0.184972	2.02012

## Sheet: I
PBS	5-FU
0.27186	0.449062
0.214702	0.61779
0.243968	0.52092
0.454929	0.62787

## Sheet: J
	Glycolysis				TCA				PPP				NAS
PBS	79.1924	83.7549	82.0399	79.8749	20.1986	15.5116	17.0919	19.2221	0.608929	0.733561	0.86819	0.892403	0	0	0	0.010543
5-FU	67.3692	73.6128	75.411	77.8671	29.2143	24.842	23.3277	19.6499	2.92493	1.24462	1.06355	2.28698	0.491579	0.300517	0.197728	0.195996
