# Supplementary material for: Context-dependent modification of PFKFB3 in hematopoietic stem cells promotes anaerobic glycolysis and ensures stress hematopoiesis
Source: eLife. 2024 Apr 4;12:RP87674. doi: 10.7554/eLife.87674 (PMC10994660; doi:10.7554/eLife.87674)
Supplement: Figure 3—source data 1. [file elife-87674-fig3-data1.xlsx]

## Sheet: Figure 3D
	5-FU
Enzyme/Simulation#	1	2	3	4	5	6	7	8	9	10	11	12	13	14	15	16	17	18	19	20	21	22	23	24	25	26	27	28	29	30	31	32	33	34	35	36	37	38	39	40	41	42	43	44	45	46	47	48	49
PGI	169.771	166.149	166.719	175.514	174.123	163.478	173.135	165.182	162.419	170.599	167.358	160.977	175.939	161.43	176.613	176.811	174.26	176.723	157.502	177.084	170.923	163.831	155.215	154.694	162.869	162.403	152.275	174.302	150.845	150.058	171.303	145.509	145.154	144.211	144.827	144.04	143.679	143.156	143.125	143.675	143.01	142.683	142.385	142.946	142.214	141.649	163.134	141.678	141.314
PFK	115.501	114.697	114.823	116.777	116.468	114.103	116.249	114.482	113.868	115.685	114.965	113.548	116.872	113.648	117.021	117.065	116.499	117.046	112.775	117.118	115.754	114.181	112.268	112.152	113.967	113.863	111.614	116.508	111.297	111.122	115.836	110.111	110.032	109.823	109.96	109.785	109.705	109.588	109.582	109.704	109.556	109.483	109.417	109.542	109.379	109.254	114.027	109.26	109.179
TPI	115.724	114.907	115.036	117.018	116.704	114.306	116.482	114.69	114.067	115.91	115.18	113.742	117.114	113.844	117.266	117.31	116.735	117.29	112.959	117.364	115.981	114.385	112.444	112.326	114.168	114.062	111.781	116.745	111.459	111.281	116.063	110.256	110.176	109.964	110.103	109.925	109.844	109.726	109.719	109.843	109.693	109.619	109.552	109.679	109.514	109.386	114.228	109.393	109.311
GAPDH	107.248	106.871	106.931	107.844	107.7	106.594	107.597	106.771	106.484	107.334	106.997	106.334	107.888	106.381	107.958	107.979	107.714	107.97	105.973	108.004	107.366	106.63	105.736	105.681	106.53	106.482	105.43	107.718	105.282	105.2	107.404	104.728	104.691	104.593	104.657	104.575	104.537	104.483	104.48	104.537	104.468	104.434	104.403	104.461	104.385	104.327	106.558	104.329	104.292
PGM	107.695	107.296	107.359	108.329	108.175	107.001	108.066	107.189	106.885	107.787	107.429	106.726	108.376	106.775	108.45	108.472	108.191	108.462	106.342	108.498	107.821	107.04	106.09	106.033	106.934	106.882	105.766	108.195	105.608	105.521	107.861	105.02	104.98	104.876	104.944	104.858	104.818	104.76	104.757	104.817	104.744	104.708	104.675	104.737	104.656	104.594	106.963	104.597	104.557
PK	109.421	108.932	109.009	110.196	110.008	108.571	109.875	108.801	108.428	109.533	109.095	108.234	110.254	108.295	110.345	110.371	110.027	110.36	107.764	110.404	109.575	108.619	107.456	107.385	108.489	108.425	107.059	110.033	106.866	106.759	109.624	106.145	106.097	105.97	106.053	105.947	105.898	105.827	105.823	105.897	105.808	105.763	105.723	105.799	105.7	105.624	108.525	105.628	105.579
PDH	98.5194	96.9394	97.1884	101.025	100.418	95.7745	99.9869	96.5178	95.3124	98.8806	97.467	94.6835	101.21	94.8809	101.504	101.591	100.478	101.552	93.1673	101.717	99.025	95.9289	92.17	91.9425	95.5091	95.3068	90.8872	100.496	90.2633	89.9202	99.194	87.9356	87.7806	87.3693	87.6383	87.2948	87.1375	86.909	86.8957	87.1356	86.8454	86.7026	86.5727	86.8177	86.4983	86.2518	95.6245	86.2642	86.1055
CS	95.7715	91.2588	91.97	102.928	101.193	87.9321	99.9627	90.0547	86.6123	96.803	92.7658	84.8163	103.457	85.3798	104.296	104.543	101.365	104.434	80.4859	104.904	97.2153	88.373	77.6375	76.9878	87.1741	86.5961	73.974	101.417	72.1921	71.2123	97.6979	65.5442	65.1016	63.9268	64.6952	63.7141	63.2649	62.6123	62.5743	63.2593	62.4307	62.0228	61.6517	62.3514	61.4393	60.7353	87.5037	60.7707	60.3174
IDH	95.7715	91.2588	91.97	102.928	101.193	87.9321	99.9627	90.0547	86.6123	96.803	92.7658	84.8163	103.457	85.3798	104.296	104.543	101.365	104.434	80.4859	104.904	97.2153	88.373	77.6375	76.9878	87.1741	86.5961	73.974	101.417	72.1921	71.2123	97.6979	65.5442	65.1016	63.9268	64.6952	63.7141	63.2649	62.6123	62.5743	63.2593	62.4307	62.0228	61.6517	62.3514	61.4393	60.7353	87.5037	60.7707	60.3174
αKGDH	90.2389	79.8216	81.4634	106.758	102.755	72.1419	99.9138	77.0419	69.0953	92.6199	83.3003	64.9493	107.98	66.2503	109.917	110.487	103.151	110.235	54.953	111.321	93.5717	73.16	48.3775	46.8779	70.3921	69.058	39.9205	103.27	35.8072	33.5454	94.6858	20.4609	19.4392	16.7273	18.5011	16.2362	15.1993	13.6929	13.6051	15.1864	13.2736	12.332	11.4754	13.0906	10.9851	9.3598	71.153	9.44159	8.39513
SDH	62.0378	21.5237	27.9087	126.284	110.714	-8.34324	99.6648	10.7132	-20.1925	71.2978	35.053	-36.3165	131.037	-31.2569	138.569	140.785	112.255	139.806	-75.1939	144.03	74.9996	-4.38454	-100.767	-106.599	-15.1487	-20.3371	-133.657	112.719	-149.654	-158.45	79.3324	-209.337	-213.311	-223.858	-216.959	-225.768	-229.801	-235.659	-236	-229.85	-237.29	-240.951	-244.283	-238.001	-246.19	-252.511	-12.1894	-252.193	-256.263
G6PD	24.3012	28.2311	27.6117	18.0694	19.5797	31.1282	20.6514	29.2797	32.2775	23.403	26.9187	33.8415	17.6084	33.3507	16.8778	16.6628	19.4302	16.7578	37.6125	16.3666	23.0507	30.7454	40.0931	40.6588	31.7896	32.2946	43.2834	19.3852	44.8351	45.6884	22.6385	50.6244	51.0098	52.0329	51.3637	52.2181	52.6093	53.1776	53.2107	52.6142	53.3358	53.691	54.0141	53.4048	54.1991	54.8122	31.5014	54.7814	55.1761
TAL	18.3063	22.5475	21.8791	11.5807	13.2106	25.6741	14.3673	23.6792	26.9145	17.3369	21.1312	28.6025	11.0832	28.0728	10.2947	10.0627	13.0493	10.1652	32.6723	9.72301	16.9494	25.2597	35.3494	35.9599	26.3865	26.9297	38.7925	13.0008	40.4671	41.388	16.4958	46.7151	47.1311	48.2352	47.513	48.4351	48.8573	49.4706	49.5063	48.8625	49.6413	50.0246	50.3734	49.7158	50.573	51.2347	26.0768	51.2014	51.6275
[truncated: 151 more columns]

## Sheet: Figure 3E
PBS	5-FU
79.9472	88.9035
76.3663	88.2841
75.7811	88.3817
75.4234	89.8857
78.0751	89.6477
79.2014	87.8275
78.0483	89.4787
76.4381	88.1189
78.2382	87.6464
75.7317	89.0451
76.9165	88.491
75.4444	87.3999
80.2181	89.9583
76.9702	87.4772
76.6816	90.0735
75.7843	90.1074
79.4663	89.6712
78.7808	90.0924
78.8774	86.8055
76.0534	90.1482
79.599	89.0985
79.5947	87.8875
82.6804	86.4146
75.8291	86.3254
86.9588	87.7228
77.8559	87.6427
82.4949	85.9118
84.5415	89.6783
85.51	85.6672
74.6573	85.5327
75.6182	89.1609
78.7354	84.7548
85.5008	84.694
76.2105	84.5328
84.6275	84.6382
76.0053	84.5036
86.9154	84.4419
84.7815	84.3524
87.5845	84.3471
88.9497	84.4412
84.7781	84.3274
84.3306	84.2715
77.134	84.2205
85.0127	84.3166
87.5699	84.1914
84.7325	84.0947
76.6343	87.7686
75.5909	84.0996
78.3581	84.0374
77.0343	84.0194
78.9584	84.0458
78.8296	84.0146
75.6676	87.5243
89.7677	83.9803
84.8432	83.9884
72.735	84.0438
84.9336	83.9446
87.6928	84.0107
78.3571	83.9385
72.7523	83.9446
72.585	83.9017
73.1313	84.1359
80.4336	83.8455
80.3725	83.8286
74.7201	83.8099
75.4104	83.8101
72.4195	83.8246
72.3461	83.801
75.8591	83.8132
73.265	83.7817
72.0906	84.0925
72.1499	83.817
71.9196	83.7879
73.8701	83.727
71.875	83.7254
71.6834	83.764
71.6753	83.6664
71.6309	83.6307
71.693	83.5382
72.6276	85.6621
71.511	83.7085
72.3668	83.5382
71.5102	83.5382
71.4134	83.5382
71.3567	83.5382
71.318	83.5778
71.1056	83.7691
72.9564	83.5382
71.0276	83.7975
71.0753	83.5382
71.0276	83.7562
71.0276	83.723
71.0276	83.5382
71.0276	83.5382
71.0943	83.7178
71.0276	83.5387
71.0276	83.5499
71.2854	83.6238
71.0276	83.558
71.4176	83.7638

## Sheet: Figure 3F
PBS	5-FU
38.3592	11.4902
49.1018	13.3483
50.8573	13.0555
51.9304	8.54361
43.9753	9.25773
40.5964	14.7181
44.0557	9.76448
48.8864	13.8441
43.4863	15.2615
51.0057	11.0655
47.4511	12.7278
51.8674	16.001
37.5465	8.32565
47.2901	15.769
48.1559	7.9802
50.8478	7.87857
39.8017	9.18702
41.8584	7.92347
41.5686	17.7841
50.0405	7.73851
39.4038	10.8989
39.4166	14.5371
30.1594	18.9569
50.7135	19.2244
17.3243	15.0309
44.633	15.2696
30.716	20.4654
24.5763	9.16577
21.6707	21.1991
54.2289	21.6025
51.3462	10.704
41.9587	23.9364
21.6983	24.1186
49.5693	24.6023
24.3182	24.2859
50.1846	24.6899
17.4546	24.8749
23.8564	25.1436
15.4471	25.1592
11.3517	24.8772
23.8585	25.2184
25.209	25.3863
46.7987	25.5391
23.1625	25.251
15.4911	25.6266
24.0033	25.9165
48.2979	14.8946
51.4281	25.9019
43.1186	26.0885
47.0978	26.1426
41.3255	26.0634
41.7104	26.1569
51.1386	15.6278
8.88865	26.2599
23.6712	26.2355
59.9958	26.0693
23.3603	26.3668
15.1221	26.1686
43.1279	26.3851
59.9439	26.3668
60.4458	26.4955
58.8069	25.7628
36.8998	26.6641
37.0189	26.7147
54.0403	26.7711
51.9604	26.7705
60.9422	26.727
61.1625	26.7977
50.6234	26.761
58.4056	26.8555
61.9288	25.9232
61.751	26.7497
62.4419	26.8371
56.5888	27.0199
62.5756	27.0244
63.1504	26.9088
63.1749	27.2015
63.308	27.3087
63.1217	27.586
60.3178	21.2145
63.6676	27.0753
61.1002	27.586
63.6701	27.586
63.9604	27.586
64.1306	27.586
64.2467	27.4672
64.8839	26.8935
59.3314	27.586
65.1179	26.8081
64.9748	27.586
65.1179	26.932
65.1179	27.0181
65.1179	27.586
65.1179	27.586
64.9177	27.0472
65.1179	27.5845
65.1179	27.55
64.3445	27.3293
65.1179	27.5266
63.935	26.9094

## Sheet: Figure 3G
PBS	5-FU
42.1727	38.6184
38.5918	37.999
38.0067	38.0966
37.6489	39.6006
40.3007	39.3625
41.4269	37.5424
40.2739	39.1936
38.6636	37.8337
40.4637	37.3613
37.9572	38.76
39.1421	38.2058
37.67	37.1148
42.4436	39.6732
39.1957	37.1921
38.9071	39.7884
38.0098	39.8222
41.6919	39.3861
41.0063	39.8073
41.1029	36.5204
38.2789	39.8719
41.8245	38.8165
41.8202	37.6029
44.9059	36.1295
38.0546	36.0403
49.1843	37.4384
40.0814	37.3591
44.7204	35.6266
46.767	39.3932
47.7355	35.3821
36.8828	35.2476
37.8437	38.8828
40.9788	34.4697
47.7263	34.4089
38.436	34.2477
46.853	34.3531
38.2309	34.2185
49.1409	34.1568
47.007	34.0673
49.8101	34.062
51.1752	34.156
47.0076	34.0423
46.5561	33.9863
39.3595	33.9354
47.2383	34.0314
49.7954	33.9062
46.958	33.8096
38.8598	37.4836
37.8164	33.8145
40.5875	33.7523
39.2598	33.7342
41.1839	33.7606
41.0559	33.7295
37.9228	37.2392
51.9977	33.6951
47.0687	33.7033
34.9605	33.7587
47.1789	33.6595
49.9184	33.7256
40.5834	33.6534
34.9778	33.6595
34.8105	33.6166
35.3568	33.8659
42.6592	33.5604
42.6302	33.5435
36.9457	33.5247
37.6405	33.5249
34.645	33.5394
34.5716	33.5159
38.0846	33.5281
35.4905	33.4966
34.3162	33.8074
34.3754	33.5319
34.1451	33.5027
36.0964	33.4418
34.1005	33.4403
33.9089	33.4788
33.9008	33.3813
33.8564	33.3456
33.9185	33.2531
34.8531	35.377
33.7366	33.4233
34.5924	33.2531
33.7357	33.2531
33.639	33.2531
33.5822	33.2531
33.5435	33.2927
33.3311	33.484
35.1819	33.2531
33.2531	33.5124
33.3008	33.2531
33.2531	33.4711
33.2531	33.4447
33.2531	33.2531
33.2531	33.2531
33.3199	33.4327
33.2531	33.2536
33.2531	33.2653
33.5109	33.3387
33.2531	33.2729
33.6496	33.4787

## Sheet: Figure 3H
DMSO	Oligo
88.1761	90.0177
88.3171	89.6848
88.9915	90.1619
87.0004	90.1619
87.325	90.1619
89.4638	90.1613
86.9175	89.556
90.1619	90.1606
83.013	90.0888
82.105	89.6018
84.8641	90.1619
85.7715	90.1202
86.4875	90.1618
83.7792	88.6268
80.9995	90.075
88.9387	88.4257
84.6991	88.4848
86.0232	88.2625
80.5819	88.1553
87.1187	88.1641
86.8811	89.0595
82.9039	89.2432
82.8797	90.1151
87.9917	89.4859
85.1424	87.3486
86.1692	87.3447
87.2309	87.2798
80.0072	87.1903
88.9675	87.1513
81.8538	87.2798
80.1916	87.0573
84.2786	87.0556
86.7538	87.088
79.6451	87.537
80.0518	87.82
79.3498	86.9631
86.4458	86.8503
87.4255	86.6949
78.8744	86.6889
89.1926	86.5901
78.7243	86.6417
78.7678	87.5018
78.3295	86.6273
78.8039	86.5212
78.2792	86.6553
78.0604	86.5093
78.2519	86.6053
78.1114	86.4693
80.0412	86.4026
78.9001	86.3516
77.5118	86.3518
77.0221	86.3731
78.0606	86.435
77.2789	86.3724
77.3182	86.3946
77.1763	86.3485
76.9716	86.317
76.8505	86.3442
88.4374	86.2659
76.8142	86.2359
76.7571	86.243
76.8062	86.6831
76.6433	86.2805
76.7069	86.2151
76.6626	87.7706
76.6352	86.1869
76.5515	86.2547
76.5233	86.2156
76.5221	86.2209
76.575	86.1836
76.346	86.1478
76.7116	86.117
76.2571	86.181
76.1951	86.1606
76.079	86.1174
78.0467	86.3653
78.2312	86.0877
84.9728	86.0276
77.4574	90.1619
77.4781	86.0276
76.941	90.1619
77.2477	86.0276
76.053	86.0276
76.1118	86.0851
76.09	86.0276
76.7431	86.0276
76.4819	86.0276
76.5513	86.0276
76.0507	86.0276
81.6941	86.0276
76.2197	86.0276
76.4005	86.1823
76.4278	86.2252
77.5942	86.0276
76.1584	86.0276
76.0484	86.1777
83.6021	86.1353
76.1433	86.0756
76.6659	86.0306
76.3373	86.0276

## Sheet: Figure 3I
DMSO	Oligo
13.6725	8.14754
13.2493	9.14642
11.2264	7.71502
17.1995	7.715
16.2256	7.71509
9.80915	7.71692
17.4482	9.53274
7.715	7.71657
29.1617	7.93436
31.8858	9.39542
23.6084	7.71512
20.8863	7.84013
18.738	7.71507
26.8631	12.3204
35.202	7.97456
11.3846	12.9237
24.1035	12.7463
20.1311	13.4132
36.4552	13.7348
16.8447	13.7083
17.5573	11.0222
29.4889	10.4711
29.5617	7.85546
14.2255	9.74305
22.7734	16.155
19.6932	16.1666
16.508	16.3613
38.1792	16.6299
11.2981	16.7467
32.6393	16.3612
37.6261	17.0288
24.943	17.0339
17.6367	16.9368
39.2653	15.5896
38.0452	14.7387
40.1514	17.3115
18.8633	17.6497
15.9242	18.1161
41.5776	18.134
8.7695	18.4302
42.0278	18.2757
41.8952	15.6954
42.4913	18.3189
41.7891	18.6371
43.363	18.234
44.0194	18.6728
43.4448	18.3849
43.8666	18.7928
38.0759	18.9929
41.5003	19.1459
45.6654	19.1454
46.0345	19.0814
44.019	18.8957
46.3638	19.0834
46.2463	19.0169
46.6717	19.1551
47.286	19.2496
47.6491	19.1682
12.8884	19.4031
47.7582	19.4929
47.9296	19.4718
47.7822	18.1289
48.2709	19.3593
48.0801	19.5555
48.2128	14.889
48.295	19.6399
48.5462	19.4367
48.6308	19.5538
48.6344	19.5381
48.4758	19.6498
49.1628	19.7574
48.0659	19.8498
49.4295	19.6577
49.6153	19.7189
49.9636	19.8486
44.0607	19.1012
43.507	19.9377
23.2822	20.1179
45.8286	7.715
45.7665	20.1179
47.3778	7.715
46.4575	20.1179
50.0417	20.1179
49.8652	19.9455
49.9308	20.1179
47.9715	20.1179
48.7551	20.1179
48.5468	20.1179
50.0487	20.1179
33.1183	20.1179
49.5417	20.1179
48.9993	19.6538
48.9174	19.5247
45.4181	20.1179
49.7256	20.1179
50.0554	19.6675
27.3943	19.7948
49.7709	19.9739
48.2029	20.1088
49.1812	20.1179

## Sheet: Figure 3J
DMSO	Oligo
45.4016	37.2432
45.5427	36.9103
46.217	37.3874
44.2259	37.3874
44.5506	37.3874
46.6894	37.3868
44.143	36.7815
47.3874	37.3873
40.2385	37.3143
39.3305	36.8273
42.0896	37.3874
42.997	37.3457
43.7131	37.3874
41.0047	35.8523
38.2251	37.3011
46.1642	35.6512
41.9246	35.7103
43.2487	35.488
37.8074	35.3808
44.3442	35.3897
44.1066	36.2851
40.1294	36.4687
40.1052	37.3406
45.2172	36.7114
42.368	34.5741
43.3947	34.5702
44.4564	34.5053
37.2327	34.4158
46.1931	34.3769
39.0793	34.5053
37.4171	34.2828
41.715	34.2811
44.1306	34.3135
36.8707	34.7626
37.2774	35.0466
36.5753	34.1886
43.6713	34.0759
44.651	33.9204
36.0999	33.9144
47.3448	33.8157
35.9498	33.8672
35.9944	34.7273
35.9155	33.8528
36.0294	33.7467
35.5048	33.8812
35.286	33.7348
35.4775	33.8308
35.3369	33.6948
37.2673	33.6281
36.1257	33.5771
34.7373	33.5773
34.7976	33.5986
35.2861	33.6605
34.5045	33.598
34.5437	33.6201
34.4019	33.574
34.1971	33.5426
34.0761	33.5697
45.663	33.4914
34.0397	33.4615
33.9826	33.4685
34.0317	33.9199
33.8688	33.506
33.9324	33.4406
33.8882	34.9961
33.8608	33.4125
33.777	33.4802
33.7488	33.4412
33.7476	33.4464
33.8005	33.4091
33.5715	33.3733
33.9371	33.3425
33.4826	33.4065
33.4207	33.3861
33.3045	33.3429
35.2722	33.5926
35.4568	33.3132
42.1984	33.2531
34.6829	37.3874
34.7036	33.2531
34.1665	37.3874
34.4733	33.2531
33.2785	33.2531
33.3374	33.3106
33.3155	33.2531
33.9686	33.2531
33.7074	33.2531
33.7768	33.2531
33.2762	33.2531
38.9197	33.2531
33.4452	33.2531
33.626	33.4078
33.6533	33.4509
34.8197	33.2531
33.3839	33.2531
33.274	33.4033
40.8277	33.3608
33.3688	33.3011
33.8915	33.2561
33.5666	33.2531

## Sheet: Figure 3K
PBS	5-FU
0.297108	1.16759
0.289335	0.720355
0.292535	1.0657

## Sheet: Figure 3L
DMSO	Oligo
1.98785	8.4166
7.40343	12.3563
6.2965	14.1224
6.86414	25.279
