# Supplementary material for: Context-dependent modification of PFKFB3 in hematopoietic stem cells promotes anaerobic glycolysis and ensures stress hematopoiesis
Source: eLife. 2024 Apr 4;12:RP87674. doi: 10.7554/eLife.87674 (PMC10994660; doi:10.7554/eLife.87674)
Supplement: Figure 4—figure supplement 1—source data 1. [file elife-87674-fig4-figsupp1-data1.xlsx]

## Sheet: B
B6J	GO-ATeam2
7.51	7.15
6.63	6.61
7.26	6.75

## Sheet: C
	B6J			GO-ATeam2
Lin-	16.9993	15.8558	19.826	13.0189	11.2604	14.5051
LSK	0.385563	0.294505	0.314939	0.419991	0.512143	0.506115
MPP3	0.161315	0.121594	0.106577	0.231517	0.306175	0.230175
MPP2	0.02253	0.014719	0.01452	0.032032	0.044287	0.03618
HSC	0.046562	0.034211	0.045738	0.031603	0.032653	0.041985
EPCR+HSC	0.005407	0.003845	0.005953	0.004862	0.003305	0.00324
MPP1	0.155157	0.123981	0.148104	0.124839	0.129027	0.197775
LKS-	1.67323	1.55076	1.55219	1.32418	1.30481	1.2096
CMP	0.764518	0.800241	0.76956	0.531245	0.448158	0.477225
GMP	0.65337	0.511173	0.476256	0.55627	0.616713	0.394875
MEP	0.090871	0.069615	0.120516	0.073645	0.076015	0.162
CLP	0.095377	0.071604	0.07986	0.070785	0.071388	0.09315

## Sheet: I
	Live			Apoptotic			Dead
Ctl	91.7	89.8	90	2.93	3.9	1.91	4.53	5.85	7.18
2-DG	86.8	89.7	81.3	6.85	7.84	12.4	5.94	2.45	3.63
Oligomycin	83.9	87.5	85.8	7.22	8.33	5.02	7.78	3.12	7.31
