# Supplementary material for: Context-dependent modification of PFKFB3 in hematopoietic stem cells promotes anaerobic glycolysis and ensures stress hematopoiesis
Source: eLife. 2024 Apr 4;12:RP87674. doi: 10.7554/eLife.87674 (PMC10994660; doi:10.7554/eLife.87674)
Supplement: Figure 4—figure supplement 2—source data 1. [file elife-87674-fig4-figsupp2-data1.xlsx]

## Sheet: C
PBS	5-FU
0.364139	0.641996
0.506033	0.636949
0.595492	0.575021
0.375162	0.467409
0.446184	0.521838
0.632662	0.54206
0.608494	0.666501
0.384359	0.532756
0.292158	0.595016
0.42555	0.491535
0.595681	0.57297
0.575086	0.584755
0.549181	0.505912
0.524824	0.441549
0.517362	0.714889
0.539156	0.658117
0.569181	0.624481
0.518095	0.475884
0.544548	0.447831
0.492215	0.602414
0.507185	0.418626
0.56735	0.572373
0.591374	0.460379
0.672198	0.445899
0.343484	0.501036
0.560587	0.266277
0.57991	0.457512
0.445222	0.852337
0.635821	0.549138
0.470582	0.487622
0.567646	0.575234
0.505179	0.529647
0.538102	0.178161
0.545099	0.419529
0.760236	0
0.499343	0.561136
0.503706	0.630263
0.447077	0.4865
0.537384	0.234134
0.498348	0.824055
0.656541	0.374052
0.556253	0.485929
0.605058
0.388397
0.472064
0.511328
0.59379

## Sheet: D
PBS	5-FU
0.259205	0.241293
0.244112	0
0.175885	0
0	0
0	0.307066
0.222502	0.354318
0.312822	0
0.168334	0
0.226712	0.287156
0	0
0	0
0.297897	0.359828
0	0.102224
0.265055	0.265809
0.099408	0.158818
0.285001	0
0.131286	0.154434
0.19638	0
0.366261	0
0	0.291733
0.226814	0.288786
0.186548	0.262407
0.197228	0
0.272115	0.154948
0.09285	0
0.223279	0.165971
0	0
0	0
0.262603
0.223349
0.231731
0
0
0
0.167598
0.273317
0.195863
0.234688
0.319601
0.236103
0.108242
0.251937
0
0.186218
0.252681
0.138334
0.121185
0.269199
0.240783
0.270972
0.170102
0
0.251749
0.042955
0
0.219221
0
0.224657
0
0.172065

## Sheet: G
PBS	5-FU
0.270227	0.72507
0.552973	0.624301
0.670459	0.747405
0.678585	0.466097
0.408319	0.522672
0.706857	0.784779
0.489098	0.660466
0.689414	0.612285
0.540376	0.645729
0.609231	0.643652
0.687897	0.704063
0.590745	0.589959
0.387031	0.646221
0.642021	0.481361
0.574968	0.539366
0.647457	0.622377
0.492843	0.525588
0.51619	0.688336
0.378507	0.69995
0.620015	0.513151
0.563994	0.46653
0.691762	0.375577
0.52855	0.335562
0.751832	0.747596
0.562983	0.320589
0.482021	0.525617
0.382985	0.530148
0.483143	0.505224
0.817624	0.197133
0.417007	0.759019
0.683608	0.616193
0.636466	0.609223
0.490005	0.494516
0.534845	0.22858
0.556783	0.808067
0.474237	0.403768
0.621205	0.613467
0.542933	0.638776
0.647353	0.519121
0	0.570736
0.660747	0.584143
0.664308
0.624913
0.690313
0.633093
0.647346
0.609503
0.48765
0.436054
0.411125
0.616235
0.290418
0.611924
0.380665
0.370701
0.703783
0.502676
0.715522
0.618869
0.482298
0.580987
0.448932
0.611042
0.573267
0.416908
0.445959
0.458427
0.505617

## Sheet: H
PBS	5-FU
0	0.277476
0.226328	0.360577
0.289311	0
0	0
0.253142	0
0	0.183289
0.256958	0.235682
0.310535	0.331144
0.300609	0.344348
0	0.105355
0.208595	0
0	0
0	0
0	0
0	0.196657
0.318424	0.141668
0	0.360388
0	0.318183
0	0.363855
0.237367	0
0.319175	0.293353
0.284503	0
0	0.328824
0.130176	0.169626
0.244793	0.325437
0.393495	0.302954
0	0
0.174555	0
0.147591	0
0.253893	0.239087
0.42718	0
0.248549	0.404627
0.173551	0.305799
0.213052	0.317747
0	0.30144
0.120836	0.292832
0.342791	0.261101
0	0.302502
0	0.235372
0	0.139262
0.213409	0.211775
0	0
0	0.32644
0.342253	0.335653
0.19143	0.302626
0	0.360231
0.120677	0.247798
0.27745	0
0.190617	0.336195
0.304499	0.328436
0.275268	0
0.125883	0
0	0
0.32871	0.093726
0.191941	0
0	0.390741
0	0
0.220702	0.277209
0.345563	0
0.167011	0
0	0.231612
0	0.257844
0.279166	0.269534
0	0
0.296433	0.109905
0.256363	0
0	0.30463
0	0
0.330532	0
0.204933
0.18707
0.295662
0.272359
0.170022
0
0.109654
0.334981
0.113125
0
0
0.305056
0.255694
0.208398
0
0
0.245555
0
0.267063
0.259916
0
0
0.264255
0
0.264838
0
0.170551
0
0.329141
0.278342
0.065256
0
0.176703
0
0
0.28797
0.202616
0.177791
0
0
0
0.257459
0

## Sheet: I
	DMSO			Pfkfb3i
PBS	3.49413	3.5247	3.11382	2.05583	2.85734	3.21994
5-FU	3.86244	3.26551	2.27627	1.43524	2.01197	0.755176

## Sheet: K
Vehicle	Etomoxir	DON	Etomoxir+DON
0.779586	0.626928	0.545366	0.695165
0.715462	0.626081	0.396893	0.710141
0.772544	0.673274	0.636853	0.713977
0.55179	0.62836	0.734924	0.196694
0.673798	0.667019	0.558432	0.604592
0.646929	0.684615	0.70254	0.341727
0.713471	0.702734	0.627596	0.735282
0.73426	0.687651	0.609968	0
0.162562	0.748229	0.579658	0.65278
0.646004	0	0.751878	0.70097
0.795464	0.64411	0.599985	0.764345
0.649562	0.81641	0.430497	0.637297
0.432975	0.635828	0.618411	0.508138
0	0.731487	0.720272	0.375906
0.771744	0.659175	1.75844	0.607942
0.629222	0.725718	0.589256	0.659884
0.664181	0.69831	0	0.664273
0.790108	0.669605	0.702652	0.61119
0.657858	0.847638	0.621991	0.675242
0.644284	0.785528	0.212953	0.671713
0.947619	0.667303	0.642732	0.689633
0.730594	0.729847	0.744035	0.697449
0.695977	0.663945	0.577751	0.649394
0.709596	0.638191	0.677227	0.65747
0.565902	0.595283	0.546291	0.754851
0.680544	0.754547	0.647545	0.621389
0.633715	0.681086	0.688104	0.438365
0.736522	0.67988	0.659318	0.653831
0.727351	0.724339	0.783002	0.637384
0.804229	0.75074	0.549813	0.662598
0.694083	0.646948	0.670903	0.744517
0.633476	0.643628	0.580732	0.566888
0.621717	0.544973	0.658841	0.775548
0	0.598964	0.784968	0.625049
0.632257	0.74304	0.603801	0.685293
0.681634	0.685501	0.686187	0.671737
0.694598	0.585775	0.656801	0.723297
0.651865	0.707894	0.681149	0
0.692196	0.587807	0.656844	0.544338
0.741612	0.651643	0.648382	0.649584
0.539797	0.631916	0.688681	0.759329
0.65773	0.560816	0.717025	0.432223
0.527409	1.53154	0.636424	0.654423
0.704751	0.670614	0.558165	0.669201
0.752105	0.670228	0.602482	0.663008
0.71965	0.523017	0.563031	0.716143
0.674718	0.673299	0.464424	0.70754
0.901854	0.320999	0.598801	0.694708
1.12494	0.68684	0.718102	0.661125
0.743628	0.715167	0.949295	0.742086
0.269348	0.731697	0.690923	0.823081
0.681217	0.583824	0.723329	1.23105
0.344426	0.612421	0.673933	0.758644
0.787975	0.783825	0.566944	0.647314
0.662649	0	0.589794	0.670746
0.780348	0.713851	0.695442	0.741919
0.700901	0.619746	0.692956	0.711053
0.731958	0.653755	0.669877	0.696065
0.576031	0.628135	0.670598	0.687097
0	0.613679	0.695718	0.665165
0.747689	0.567614	0.528158	0.64099
0.730622	0.656434	0.42272
0.678607	0.829655	0.725567
0.611014	0.712705	0.69509
0.559568		0.623632
0.652343		0
0.680608		0.667553
0.667786		0.726354
0.676616		0.583699
0.667834		0.707044
0.778445		0.58058
		0.416552
		0
		0.635588
		0
		0.644295
		0.640187
		0.720748
		0.841063
		0.519038
		0
		0.751872
		0.65403

## Sheet: M
Vehicle	Etomoxir	DON	Etomoxir+DON
0.670797	0	0.562855	0.675975
0.631309	0.686732	0.739241	0.641692
0.366826	0.601175	0.605941	0.724917
0.736722	0.65136	0.659881	0.628754
0.621071	0.685766	0.775563	0.735285
0.559465	0.644763	0.750151	0
0.552447	0.69921	0.669874	0.684807
0.671204	0	0.661771	0
0	0.722664	0	0.77503
0.710144	0.377716	0.695603	0
0.638059	0.683929	0.647573	0.643179
0.610738	0.688632	0.716246	0
0.684493	0.610505	0.678251	0.600081
0.64676	0.479356	0.683346	0.523961
0.473316	0.709599	0	0
0.667752	0.588001	0.610135	0.699605
0.675569	0.640093	0.675591	0.447181
0.673668	0.692274	0.681207	0.606938
0.64381	0	0.661787	0.70418
0.676797	0.636342	0.577722	0.658762
0.666071	0	0.462226	0.701476
0.68321	0	0.675244	0.521062
0.614624	0	0.629158	0.638261
0.594883	0.687323	0.65331	0.704783
0.533976	0.630717	0.458018	0.671365
0	0.257773	0.585669	0.686655
0.549393	0.609415	0.625214	0.761748
0.708874	0.255084	0.298846	0.693381
0.714465	0.738932	0.697105	0.629038
0.627393	0	0.608215	0.763216
0.632577	0.635972	0.706362	0.774655
0.667627	0.621782	0.69833	0.66448
0.751924	0.679852	0.680824	0.642554
0.566027	0.348408	0.677717	0.316794
0.63624	0.640976	0.709328	0.678679
0.747056	0.684338	0.661697	0.525087
0.627045	0.705585	0.714533	0.47497
0.666434	0.526554	0.643065	0
0	0.603803	0.660426	0.636347
0.699073	0.623179	0.657878	0
0.554966	0	0.234071	0.670941
0.645408	0.642781	0.664613	0.678249
0.638912	0	0.729541	0.479853
0.687727	0.667616	0.676107	0
0.603418	0.621284	0.609947	0.659084
0.558508	0	0.665173	0.616026
0.632186	0.633172	0.466573	0
0.452966	0	0.483018	0.735685
0.605154	0.351431	0.658949	0
0.549062	0.502479	0.730154	0.474492
0.590437	0.719487	0.693154	0.686092
0.712981	0.697934	0.57287	0.615253
0.60689	0.482844	0.679341	0.606623
0	0.618578	0.671366	0.680639
0.667087	0.699681	0.484948	0.633764
0.635312	0.274413	0.661784	0.596327
0.6366	0.671132	0.700006	0.656758
0.629258	0.703696	0.60383	0.768037
0.627928	0.344894	0.673268	0.258119
0.688186	0.760506	0.289628	0.702124
0.537405	0.692163	0.702547	0.628965
0.681	0.689631	0.651327	0.740502
0.726394	0.617745	0.668111	0.632688
0.72207	0.688138	0	0.702982
0	0.622682	0.685491	0.168938
0.509591	0.692519	0.66069	0.449719
0.595574	0.509638	0.47738	0.638717
0.660225	0.450052	0.570633	0.697225
0.701292	0	0.69212	0.700047
0.710635	0.293129	0.630035	0
0.719713	0.594827	0.66821	0.646524
0.614496	0.603151	0.764238	0.671142
0.740413	0.431822	0.678419	0.624778
0.644244	0.648492	0.605606	0.708143
0	0.716808	0.623457	0.676813
0.648845	0.545351	0.619276	0.638826
0.629308	0.707172	0.636172	0
0.690715	0.721164	0.628405	0.676769
0.513767	0.70513	0.57021	0.800621
0.615694	0.681473	0.528029	0.659101
0	0.665436	0.279706	0.656025
0.138263	0	0.522942	0.739549
0.687353	0.636704	0.685391	0.513323
0.648967	0	0	0.182561
0.645349	0.573141	0.703632	0.422741
0.571965	0.586355	0	0.546079
0.695477	0	0.645869	0.775368
0.642856	0.599897	0.588021	0.717466
0.682919	0.654206	0.584394	0.73358
0.599955	0.648709	0.67615	0.732212
0.593767	0.693723	0.606233	0.702408
0.641288	0.68425	0.67166	0
0	0.653262	0.667962	0
0	0.70917	0.625484	0
0.616036	0.651806	0.234252	0.607754
0.582498	0.656264	0	0.686409
0	0.560875	0.46851	0.717463
0.65217	0	0	0
0.556352	0.630217	0	0.680913
0.622303	0.631938	0.434901	0.541747
0.634294	0.69121	0.360749	0.603464
0.693072	0.607048	0.561242	0
0.66797	0.620887	0.614709	0.658822
0.106659	0.756008	0.698335	0.631265
0	0.602982	0.669456	0.692083
0.764202	0	0.675797	0.700874
0.628788	0.599149	0	0.755227
0	0.65676	0.587322	0.600014
0.645907	0.619922	0	0.588088
0.519575	0.670043	0.566045	0.682036
0.612731	0.709285	0.262839	0.58411
0.719252	0.518102	0.6452	0.632081
0.631748	0.594214	0.55918	0.590653
0.602395	0.623435	0.68577	0.68839
0.622568	0.666149	0.661721	0.604208
0.228853	0.647285	0.678473	0.669125
0.660935	0.668713	0.726478	0.673888
0.72853	0.564094	0.350029	0.733297
0.645579	0.646149	0.591246	0
0.656298	0.448362	0.637227	0
0.693652	0	0.673453	0.31371
0.546675	0.73551	0.694986	0.751603
0	0.687747	0.731341	0.690365
0.751435	0.397056	0.636895	0.711003
0.574975	0.7304	0.666587	0.409484
0	0.562061	0.407631	0
0.550656	0	0.585607	0.655726
0	0.641413	0.675526	0.672739
0.642793	0.671985	0.538248	0.65903
	0.434982	0.745616	0.675761
	0	0.612721	0.635871
	0.65575	0.431173	0.59863
	0	0.638873	0.598609
	0.623481	0.69911	0.305371
	0.601292	0.495002	0
	0.795234	0.705237	0.551447
	0.70548	0.62379	0.712699
	0.708124	0	0.467797
	0.575571	0.773768	0.653525
	0.686888	0.667766	0
	0.628869	0.588649	0.210528
	0	0	0.170988
	0	0.617673	0.562635
	0.270314	0.212107
	0.476298	0.614742
	0.633202	0.70189
		0.613321
		0.650804
		0.577039
		0.654834
		0.65927
		0.570428
		0.670104
		0
		0.879607
		0.71746
		0.624438
		0.693869
		0.651108
		0.480166
		0.644369

## Sheet: N
PBS	PBS (Etomoxir+)	5-FU	5-FU (Etomoxir+)
2313.98	1149.96	3056.2	1794.5
1548.08	1961.74	1847.78	2674.36
1838.9	2576.68	3216.04	2953.34
3320.38	656.38	2169.68	1285.38
2732.82	1252.82	2135.64	1647.24
2807.56	1118.88	1697.56	3578.64
2123.8	1533.28	3574.2	1575.46
2035.74	1366.04	2791.28	2648.46
1658.34	1575.46	3330	820.66
2650.68	1562.14	3460.98	3247.12
1882.56	1955.08	1708.66	1546.6
1866.28	1843.34	3416.58	2354.68
2166.72	1707.18	1938.06	1538.46
3142.78	1676.84	2111.96	3307.8
3112.44	1707.18	2132.68	876.9
2385.76	974.58	2621.82	2526.36
1462.98	1568.06	4246.12	1802.64
3876.12	1170.68	2106.04	1094.46
2794.24	1753.8	6728.82	1214.34
2691.38	1474.08	2566.32	2581.86
3349.98	1059.68	1707.18	1072.26
2723.94	1485.92	2348.02	1144.04
3300.4	1521.44	3556.44	2079.4
2083.84	2969.62	3476.52	2172.64
2096.42	1480.74	3426.2	3381.8
2390.2	2217.78	3132.42	3191.62
2660.3	1677.58	3520.92	5037.92
3852.44	1925.48	1517.74	4203.94
3600.1	1067.08	4140.3	1916.6
2884.52	1835.94	4145.48	1345.32
1963.96	3048.8	3165.72	1416.36
2214.82	1390.46	2635.88	1216.56
2571.5	1633.92	1839.64	2396.86
3298.92	2285.86	1770.82	2083.84
2736.52	2996.26	3206.42	1241.72
2310.28	1783.4	1576.2	1414.88
2644.76	2046.1	3844.3	1370.48
3860.58	1406.74	3790.28	3287.08
3364.04	1018.24	4868.46	1174.38
4938.76	3644.5	4573.94	2567.06
3385.5	2282.16	2770.56	3442.48
	1815.96	994.56	2535.24
	1618.38	1701.26	1106.3
	2157.1	1588.78	1744.18
	1545.12	2012.06	1233.58
	2037.22	3563.1	2607.76
	1546.6	2319.16	4039.66
	2896.36	2704.7	2029.08
		5583.3	1528.84
		3886.48	1340.88
		2055.72	964.96
		1301.66	1558.44
		1073.74	1317.94
		2822.36	3972.32
		2513.78	3150.92
		3458.76
		1585.08
		3624.52
		2442
		1878.12
		2592.22
		2706.92
		1691.64
		4186.92
		2062.38
		4854.4
		3924.96
		2934.84

## Sheet: P
Vehicle	DON	DON+Pfkfb3i	Etomoxir	Etomoxir+Pfkfb3i
0.678968	0.728304	0.731948	0.699853	0
0.713617	0.686481	0.635882	0.537071	0
0	0.74966	0.7019	0.798067	0
0.622412	0.750101	0.71885	0.676452	0.434027
0.694708	0.771458	0.757131	0.685953	0
0.757515	0.745831	0.307729	0.600618	0
0.750262	0.63103	0.778872	0.637147	0
0.681455	0.658893	0.271376	0	0
0.678282	0.822666	0.750807	0.575781	0
0.614339	0.731717	0.69099	0.69026	0.330963
0.559248	0.762125	0.652765	0.70677	0
0.649759	0.77703	0.650773	0.533091	0
0.40732	0.669514	0.651179	0.724614	0
0.737947	0.690516	0.648594	0.665513	0
0.760083	0.743954	0.405884	0.755821	0
0.699656	0.746927	0.742369	0.690884	0
0.717267	0.723072	0.676591	0.646061	0
0.671679	0.664285	0.669775	0.657842	0
0.434681	0.754268	0.731072	0.627547	0
0.65471	0.770538	0.79574	0.761459	0
0.661933	0.268483	0	0.709332	0
0.726766	0.708349	0.648125	0.626201	0
0.52413	0.748801	0.703919	0.76534	0.159047
0.73062	0.683648	0.7027	0.676817	0
0.699246	0.726884	0.780678	0.725014	0
0.670542	0.692504	0.704863	0.629444	0
0.683983	0.684996	0.620393	0.739242	0
0.742907	0.691592	0.69754	0.348164	0
0.661488	0.761493	0.723261	0.638831	0
0.747355	0.600826	0.69082	0.616241	0
0.660042	0.789295	0.6355	0.71884	0.241017
0.719969	0.771609	0.753068	0.819934	0
0.774463	0.650925	0.708362	0.70752	0
0.242708	0.608939	0.729795	0.681556	0
0.689543	0.665766	0.621599	0.711076	0
0.597998	0.783627	0.683201	0.638665	0
0.756525	0.707614	0.873946	0.700432	0
0.711857	0.743743	0.597295	0.659909	0
0.769736	0.747116	0.754843	0.653022	0
0.661301	0.739885	0.774623	0.779989	0
0.756908	0.677018	0.74071	0.62418	0
0.618616	0.763137	0.726307	0.591078	0
0.724652	0.788131	0.724673	0.662887	0
0.734096	0.717032	0.703004	0	0
0.669171	0.683215	0.59188	0.743758	0
0.745307	0.71216	0.720417	0.570204	0
0.684505	0.763471	0.722265	0.696631	0
0.759991	0.743581	0.768668	0.709487	0
0.662062	0.689804	0.802347	0.764225	0
0.65295		0.654261	0.708396	0
0.732657		0.689561	0.631101
0.646776			0.779046
0.732461
0.81855
0.749021
0.655041
0.773403
0.759312
0.799301
0.541384
