# Supplementary material for: Context-dependent modification of PFKFB3 in hematopoietic stem cells promotes anaerobic glycolysis and ensures stress hematopoiesis
Source: eLife. 2024 Apr 4;12:RP87674. doi: 10.7554/eLife.87674 (PMC10994660; doi:10.7554/eLife.87674)
Supplement: Figure 4—source data 1. [file elife-87674-fig4-data1.xlsx]

## Sheet: Figure 4D
PBS	5-FU
0.450161	0.354615
0	0.355175
0.361672	0
0	0.935664
0.803786	0
0.617048	0
0	0.34269
0.597223	0.457705
0.316391	0.192291
0.375115	0.417866
0.8181	0.216342
0.500429	0.503611
0.711347	0.485585
0.628827	0
0.691579	0.377572
0	0.353794
0.74034	0
0.216243	0
0.49806	0
0.630493	0.407621
0.599944	0.156261
0.647935	0.339692
0.666972	0.215032
0.662471	0
0.793165	0.327083
0.698261	0.207947
0	0.344807
0.291568	0
0.756655	0.872966
0.761237	0.448812
0.620786	0.414222
0.428333	0.419329
0.716989	0
0.642018	0
0.67839	0.321257
0.367046	0
0.390548	0
0.162763	0.18515
0.724782	0
0.518449	0.57117
0.765816	0
0.330791	0
0.735948	0.0885402
0.67105	0.382089
0.637665	0.298253
0.280931	0.234247
0.559231	0
0.38197	0.390244
0.675918	0.419115
0.463182	0.404279
0.747345	0
0.73658	0
0.671148	0
0.611231	0.473643
0.389301	0.514579
0.640928	0
0	0
0.563844	0.974314
0.68595	0.285768
0.719425	0.271542
0.538271	0
0.774203	0.584634
0.387174	0.437905
0.687604	0.516773
0.626893	0.232017
0.636709	0.475285
0.717983	0.481639
0.6323	0
0.697902	0.287985
0.680324	0.430455
0.580568	0
0.52458	0.349951
0.711759	0.293551
0.601566	0.480315
0.499408	0.501806
0.522496	0
0.627851	0.361336
0.494748	0
0.595435	0.314934
0.635246	0
0.611818	0.342071
0.64135	0
0.599956	0.156217
0.631418	0.897275
0.740847	0.252786
0.840623	0.40051
0.736362	0.441104
0.607684	0.309987
0.625587	0.446031
0.48587	0
0.652296	0.513034
0.512317	0
0.420481	0
0	0.530338
0.631136	0.187901
0.638166	0
0.504374	0.326885
0.503941	0.390361
0.523926	0
0.375973	0
0.422791	0.174639
0.611964	0
0.669453	0.333177
0.6814	0
0.732805	0.349072
0.616894	0
0.082108	0.42573
0.403313	0.300802
0.67045	0.416323
0.267969	2.42609
0	0
0.292117	0
0.601449	0
0.581482	0
0.367517	0.4012
0.480651	0
0.499325	0
0.537786	0.218576
0.565875	0.292664
0.338448	0
0.793701	0
0.410805	0.297607
0.581124	0.386536
0.650159	0.664683
0.618858	0.441586
0.644126	0.284759
0	0.377975
0.516024	0.277251
0.630785	0.42249
0.236561	0.368669
0.850033	0
0.40318	0.181768
0.440831	0.150243
0.350744	0.33094
0.537719	0.454407
0.624033	0.355394
0.700337	0.339742
0.4504	0.487884
0.400884	0
0	0
0.655166	0.381013
0.555197	0.311028
0.637494	0
0.565897	0
0.534771	0
0.545222	0.395493
0.419834	0
0.516332	0.349037
0.744021	0
0.234868	0.338224
0.451889	0.276762
0.356223	0.292673
0.505771	0
0.600534	0.396314
0.700873	0.430111
0.274683	0
0.518131	0
0.512651	1.11297
0.55301	0.439543
0.6227	0.266004
0.766866	0
0.665384	0
0.477248	0.351564
0.598027	0.375091
0.517984	0
0.657153	0
0.201068	0
0.623895	0
0.636888	0.432573
0.55817	0
0.267635	0.353182
0.665801	0.441071
0.565695	0.485349
0.548101	0
0.553447	0.484495
0.693384	0
0.589841	0.257906
0.591248	0.315681
0.604247	0
0.42481	0.9294
0.6267	0
0	0.209521
0.600416	0.260229
0.685567	0.612476
0.727823	0
0.510078	0.511167
0.427035	0.780349
0.534369	0
0.707988	0
0.382994	0.102348
0.5443	0.363437
0.19881	0.289153
0.537742	0
0.515458	0.34466
0.379459	0.146467
0.623463	0.494001
0.630306	0
0.699677	0.921028
0.61274	0.475153
0	0.655703
0.70181	0
0.464497	0.393632
0.484411	0
0.588139	0
0.852941	0.400905
0.595215	0
0.521849	0
0.646385	0.44839
0	0.22454
0.728183	0.4363
0.390541	0.366678
0.382204	0
0.558974	0
0.594504	0.389511
0.687066	0.374136
0.580439	0.347564
0.562258	0.367994
	0.344293
	0.28975
	0.323301
	0.465559
	0
	0.714511
	0.805267
	0.371165
	0.38691
	0.206152
	0
	0
	0
	0.377889
	0
	0.434035
	0.36554
	0.584133
	0.377056
	0.341779
	0.301561
	0.418394
	0.343373
	0
	0.399513
	0
	0.232002
	0.487141
	0
	0.323609
	0.319947
	0.369216
	0.944125
	0
	0
	0.234913
	0.31541
	0.370601
	0.180003
	0.470995
	0.361159
	0.178131
	0.113141
	0.329381
	0
	0
	0.46547
	0
	0.324669
	0
	0
	0.454105
	0
	0
	0.100367
	0
	0
	0.421916
	0.158052
	0
	0.39286
	0.50136
	0.422143
	0.874235
	0.922227
	0
	0.28832
	0
	0.123975
	0.384944
	0.32376
	0
	0.36479
	0.364006
	0.476797
	0

## Sheet: Figure 4E
PBS	5-FU
0.29752	0
0	0
0.22529	0
0.550718	0
0.343422	0
0.374501	0.344931
0.235106	0.411745
0.42929	0.34484
0.502146	0
0.431057	0.40731
0.34946	0.562196
0	0
0.267071	0.240819
0.245319	0.323494
0	0.559162
0.302848	0.454331
0.535624	0.282555
0.2956	0.387239
0.197921	0.319892
0.381643	0
0.316659	0.487452
0.357168	0
0	0.219944
0.411769	0.410516
0.284774	0
0.406048	0.12636
0.42165	0.253906
0	0.328931
0.331797	0.493708
0.357401	0.21438
0	0
0	0.429581
0.295315	0.406706
0.268959	0
0.357124	0.30047
0.41782	0.353521
0.394872	0.285925
0.175485	0.310172
0.146763	0
0.467887	0
0	0.529638
0.374409	0
0.269921	0
0.283825	0
0	0
0.389259	0.142719
0.245911	0.198715
0.23967	0.266811
0.148444	0.273362
0.359102	0.826223
0.472956	0
0.260274	0.243875
0.428293	0
0.514619	0.247403
0.141554	0
0.303214	0.393537
0.281284	0.420735
0	0.328268
0	0
0.370137	0
0.214075	0
0.289772	0.253135
0	0.139748
0.126563	0
0.381426	0.233444
0	0.337392
0.18874	0.586782
0.365683	0.270804
0.327316	0.189603
0.322135	0.424531
0.339977	0
0.270201	0.210653
0	0
0	0.283407
0	0.291108
0.167831	0.207951
0.586266	0.428512
0	0.408398
0.335139	0.465301
0.325742	0
0.32672	0.451513
0	0.396062
0	0
0.428086	0
0.20707	0.394976
0	0.689863
0.146536	0.418353
0.52357	0.261105
0.431318	0
0	0
0.467927	0.262523
0.589365	0
0.50692	0.261044
0.383029	0
0.415169	0.271126
0.371774	0
0.397272	0
0	0
0.508899	0
0.507699	0.373048
0.41822	0.377026
0.275942	0.337779
0.274047	0.283499
0	0
0.289839	0
0.198425	0
0.413406	0.480151
0.403682	0.280505
0.249105	0.442911
0.365771	0.440412
0.486188	0
0.518996	0.352763
0.372983	0.378165
0.367334	0.31106
0.187927	0
0.359206	0
0	0.200286
0	0
0.239699	0
0.337041	0
0.221958	0.211787
0.251969	0.299624
0.350626	0.348902
0.120289	0
0.202509	0
0.122868	0.334633
0.256636	0
0.422571	0
0.333994	0.437187
0.446273	0
0	0.196964
0.503291	0.490987
0.149382	0.245565
0.238537	0.184161
0.397872	0.307632
0.114563	0.301108
0.505069	0
0.286983	0
0	0.510598
0.229027	0
0.184549	0.341079
0	0
0	0.160404
0.191812	0
0.429641	0
0.30528	0
0.451651	0.143577
0	0
0	0.252246
0.239136	0
0.184647	0
0.445674	0.200526
0	0.229636
0.085976	0.586659
0	0.423712
0	0.306809
0	0
0	0.464445
0	0.380388
0	0.357833
0	0.495595
0	0
0	0.218561
0	0.359157
0	0
0	0.174397
0	0.306036
0	0.433728
0	0.369829
0	0.473338
0	0.208442
0	0.362134
0	0.094415
0	0
0	0
0	0
0	0.219465
0	0.306804
0	0
0	0.34766
0	0.166881
0	0
0	0
0	0.404462

## Sheet: Figure 4F
Pfkfb1	Pfkfb2	Pfkfb3	Pfkfb4
138.974	1147.59	5025.18	307.428
332.032	926.922	4097.19	275.629
233.675	1288.24	4507.62	262.733

## Sheet: Figure 4I
PBS	5-FU
0.712124	0
0.637614	0
0.726106	0.564357
0.74124	0.905565
0.669703	0
0.739673	0
0.565818	0.743535
0.762861	0
0.772591	0.685925
0.563927	0.534843
0.67669	0.336604
0.479406	0
0.70227	0
0.802868	0
0.626452	0.859472
0.724014	0
0.794159	0
0.707588	0
0.752095	0
0.599616	0
0.784539	0
0.601079	0
0.709212	0.714922
0.709181	0.474016
0.71401	0.28869
0.693314	0.601658
0.413225	0.222811
0.739251	0.661767
0	0.812393
0.681983	0
0.706219	0.706382
0.562567	0.62683
0.752192	0
0.270507	0
0.752317	0.698357
0.783256	0
0.715922	0
0.727873	0.563682
0.262775	0.333787
0.507434	0
0.784921	0.846484
0.742608	0.47885
0.857386	0.422856
0.508582	0
0.741932	0
0.732321	0.704617
0.563731	1.24123
0.407459	0.17499
0.70144	0.471709
0.655568	0.238382
0.706344	0.398948
0.794139	0
0.750791	0
0.658576	0
0.663506	0
0.795116	0
0.281542	0.398694
0.554541	0.553921
0	0
0.682508	0
0.732699	0.243933
0.725868	0.851024
0	0.259655
0.372147	0.333064
0.782492	0
0.812385	0
0.389202	0.150858
0.790534	0.307661
0.732539	0
0.335576	0.893934
0.827187	0.300912
0.734415	0
0.434808	0.51656
0.820511	0
0.747246	0.830645
0.768485	0
0.692695	0.581826
0.807903	0
0.685293	0.445537
0.411085	0.595662
0.588895	0.68139
0.631683	0.543637
0.742388	0.463985
0.663993	0
0.547239	0
0.670367	0.382019
0.764667	0.643402
0.870008	0.235078
0.678632	0
0.509672	0
0
0.637388
0
0.75717
0
0.734176
0.861866
0.741743
0.628852
0.604732
0.829296
0.812278
0.726272
0.646632
0.802879
0.677684
0.723892
0.459315
0
0.699017

## Sheet: Figure 4J
PBS	5-FU
0.760738	0.786486
0.928861	0
0.802148	0.876035
0.767728	0.846269
0.764156	1.04293
0.782429	0.272658
0.808532	0.983609
0.847217	0.915824
0.789097	0.739687
0	0.83607
0.15173	0.94103
0.688648	0.887488
0.838918	0.810147
0.727595	0.905264
0.739894	0.449146
0.32796	0.818656
0.789825	0.846232
0.788962	0.977385
0.715998	0.919838
0.733182	0.421876
0.783749	0.925805
0.377105	0.771923
0.878916	0
0.709512	0.557484
0.808868	0.840668
0.741579	0.832048
0.786508	0.800654
0.84582	1.34173
0.792764	0.781738
0.791972	0.771793
0.836764	0.766186
0.729154	0.720651
0.782015	0.837865
0.845085	0.869483
0.857899	0.791833
0.927114	0.644636
0.776491	0.872174
0.789093	0.886497
0.782232	0.76881
0.880324	0.889051
0.127754	0.894754
0.825943	0.841882
0.743009	0.910709
0.780594	0.843437
0.748594	0.893931
0.644106	0
0.81404	1.0819
0.329931	0.849018
0.822185	0.694931
0.746113	0.668201
0	0.968406
0.835798	0.930726
0.940561	0.749954
0.835742	0.819732
0.793987	0.897808
0.766803	0.744748
0.772525	0.615954
0.776067	0.888491
0.749334	0.852115
0.680001	0.981017
0.790425	0.941944
0.810068	0.929759
0.751835	1.10386
0.841009	0.822046
0.765636	0.961076
0.833935	0.855528
0.791409	0.322307
0.228204	0.324079
0.756303	0.782448
0.709201	0.805082
0.767765	0.857875
0.725908	0.765281
0.713557	0.928682
0.791386	0.940196
0.796033	0
0.849138	0.862714
0.783634	0.236137
0.781554	0
0.777989	0
0.807281	1.16459
0.854573	0.48225
0.308529	0.849556
0.810889	0.841977
0.75245	0.757497
0.701805	0.949956
0.808437
0.743159
0.782376
0.748826
0.735701
0.753447
0.848164
0.865135
0.724156
0.681347
0.826374
0.555246
0.781022
0.729783
0.764291
0.722453
0.728956
0.771968
0.810141
0.789478
0.796965
0.849379
0.845491
0.765519
0.732746
0.765937
0.807718
0.746747
0.807314
0.410289
0.803701
0.082197
0.652023
0.744479
0.813545
0.754655
0.599487
0.765258
0.722582
0
0.725751
0.845132
0.773331
0.733433
0.725797
0.877983
0.787981
0.752686
0.778811
0.829815
0.727386
0.793157
0.762916
0
0.795295
0.70372
0.738676
0.78105
0.786655
0.829354
0.842099
0.547036
0.802988
0.741512
0
0.771657
0.745398
0.789887
0.793593
0.718892
0.853933
0.82775
0.793654
0.358011
0.781365
0.764598
0.825297
0.853675
0.773159
0.848833
0.776292
0.690232
0.788342
0.728258
0.535267
0.714265
0.909907
0.760555
0.870886
0.67231
0.71696
0
0.740414
0.835714
0.860454
0.793797
0.786939
0.455051
0.736574
0.795817
0.684018
0.78239
0.775893
0.745844
0.769216
0.758757
0.861816
0.760372
0.745718
0.79538
0.721969
0.784961
0.774804
0.838613
0.794691
0.783115
0.748889
0.766315
0.870197
0.782044
0.819203
0.809121
0.919994
0.779655
0.788697
0.779885
0.783702
0.270874
0.879777
0.820563
0.739604
0.744306
0.791426
0
0.848083
0.812976
0.756491
0.75528
0.824508
0.67683
0.736227
0.783875
0.469064
0.881392
0.904582
0.477191
0.718404
0.742746
0.831416
0.77039
0.779743
0.79373
0.838543
0.784167
0.825899
0.873982
0.845817
0.786087
0.795742
0.781461
0.816732
0.367404
0.667867
0.788407
0.865011
0.789002
