# Supplementary material for: Context-dependent modification of PFKFB3 in hematopoietic stem cells promotes anaerobic glycolysis and ensures stress hematopoiesis
Source: eLife. 2024 Apr 4;12:RP87674. doi: 10.7554/eLife.87674 (PMC10994660; doi:10.7554/eLife.87674)
Supplement: Figure 5—figure supplement 1—source data 1. [file elife-87674-fig5-figsupp1-data1.xlsx]

## Sheet: F
Ctl	Oligomycin	Glc+Oligomycin	FCCP	Glc+FCCP	Rotenone	Glc+Rotenone
0.599078	0.246948	0.743122	0	0.780247	0	0.757958
0.713925	0	0.757253	0	0.493648	0.254521	0.743619
0.720046	0.167959	0.780753	0	0.716921	0.142539	0.686196
0.744145	0	0.824957	0	0.776631	0.116086	0.717463
0.759246	0	0.647866	0.29464	0.689917	0.2093	0.667877
0.724669	0	0.676544	0	0.661352	0	0.739281
0.625765	0.259917	0.745955	0	0.545991	0	0.688578
0.614193	0	0.731304	0	0.777142	0	0.693115
0.67268	0.330503	0.745967	0	0.402624	0.29909	0.673783
0.742777	0.134659	0.647491	0.259231	0.657497	0.22631	0.701364
0.707939	0.232006	0.655377	0	0.742411	0	0.702051
0.488475	0	0.541781	0.099559	0.695209	0.258074	0.744108
0.747698	0	0.702689	0.214124	0.713089	0	0.726406
0.748654	0.268404	0.733151	0.318867	0.671507	0.220414	0.715014
0.693978	0.349658	0.751665	0	0.818945	0.124077	0.73981
0.714303	0	0.561032	0.205665	0.789693	0	0.637714
0.734648	0.248781	0.707641	0	0.709792	0.28867	0.721547
0.666714	0.156218	0.762961	0.293022	0.531851	0.221081	0.72777
0.719058	0.342371	0.794951	0	0.461127	0	0.627034
0.681857	0	0.658987	0	0.731744	0	0.755608
0.745887	0.152041	0.751018	0	0.764397	0	0.525665
0	0.242077	0.697957	0	0.766988	0	0.678676
0	0.195651	0.567526	0	0.692546	0.189627	0.707639
0	0	0.537705	0.313398	0.736331	0.189782	0.604386
0.718165	0.229666	0.705647	0	0.767392	0.189822	0.549138
0.672442	0	0.648847	0	0.721708	0.271273	0.705661
0.766063	0.200283	0.681699	0	0.739385	0	0.757816
0.726311	0.18264	0.720842	0	0.746572	0.178611	0.707912
0.718528	0	0.607477	0	0.582864	0	0.555657
0	0	0.516749	0.179231	0.751268	0.250375	0
0.727181	0.14155	0.659892	0	0.595671	0.280486	0.803977
0	0	0.670358	0	0.85386	0	0.714697
0	0	0.711052	0	0.723862	0.251226	0.195939
0.788561	0	0.816579	0.154164	0.453487	0.275862	0.75838
0	0	0.721857	0	0.629256	0	0.771055
0.289977	0.17149	0.730024	0	0.808427	0.098045	0.771285
0.754471	0	0.721717	0.22957	0.721866	0	0.777049
0.66236	0	0.563292	0	0.663689	0	0.758213
0.730957	0.282726	0.367577	0	0.704967	0.146908	0.726442
0.690557	0	0.742962	0	0.727923	0	0.666257
0.729038	0	0.756164	0	0.740081	0.283976	0.744098
0.77994	0	0.706218	0	0.728011	0	0.74444
0.677918	0.177603	0.71968	0	0.729928	0.039152	0.727112
0.722507	0.391817	0.579609	0.21052	0.2748	0	0.727997
0.233896	0.142605	0.717167	0	0.809312	0	0.614357
0.678457	0.274264	0.616759	0	0.665915	0.465152	0.662339
0.631923	0	0.632894	0	0.689415	0.359775	0.659403
0.712633	0.157821	0.689489	0.24505	0.786456	0.225425	0.747603
0.692607	0.151564	0.764376	0	0.730496	0	0.665603
0.701669	0	0.551151	0	0.68831	0.429756	0.677069
0.606899	0.178092	0.67454	0	0.746571	0	0.804934
0.680842	0	0.749967	0.230964	0.724339	0.324513	0.759994
0.370628	0	0.781025	0	0.662611	0	0.634651
	0.23919	0.666629	0	0.706736	0.262282	0.749701
	0.183948	0.62786	0	0.706724	0.160489	0.530751
	0	0.688146	0	0.711385	0	0.691115
	0.238122	0.771606	0	0.758468	0.22957	0.626618
	0.279216	0.737464	0.222739	0.621395	0	0.44669
	0.264113	0.752856	0	0.310254	0.119421
	0.23509	0.574953	0.149919	0.61476	0.283675
	0.377415	0.745428	0	0.625511	0.135673
	0.131193	0.70724	0	0.63688	0
	0.247941		0.145246	0.66069	0
	0		0.144747	0.749003	0.302206
	0		0.080191	0.775443	0.188669
	0.154626		0.260213	0.704544	0
	0.219255		0.251073	0.785571	0.15028
	0		0	0.735501	0.255437
	0.268052		0	0.433725	0.246855
	0.216834		0.114694	0.753564
	0		0.15086	0.716418
	0		0	0.46632
	0		0	0.703551
	0.195424		0.159077	0.8666
	0.161082		0	0.776002
	0.243969		0	0.69535
	0.17577		0	0.732086
	0.136472		0.293502	0.735674
	0		0.285215	0.737119
	0		0	0.774091
	0		0	0.755873
	0.22038		0	0.62184
	0.177361		0.162045	0.655392
	0		0.241267
	0.26739		0
	0		0.237069
	0.187994		0
	0.259821		0.212594
			0
			0
			0
			0.274119
			0
			0
			0
			0
			0

## Sheet: J
Glc	PKM2i	Glc+Oligo	Glc+Oligo+PKM2i
0.902754	0.72944	0.592094	0.639203
0.770538	0.718093	0.715119	0.595818
0.702203	0.736694	0.763084	0.815601
0.7794	0.725383	0.743873	0.75723
0.705716	0.67199	0.736521	0.635241
0.769869	0.785269	0.776538	0.702261
0.759746	0.764519	0.773904	0.567126
0.714138	0	0.785751	0.660227
0.642423	0.714219	0.842936	0.746065
0.843997	0.907237	0.588243	0.553735
0.706196	0.732035	0.710191	0.712582
0.647331	0.754812	0.722319	0.539282
0.715067	0.69091	0.694847	0.6393
0.65861	0.800465	0.762773	0.626743
0.773712	0.688806	0.328152	0.578812
0.786343	0.713932	0.672589	0.372632
0.645709	0.853205	0.919061	0.730984
0.743719	0.752527	0.426087	0.665118
0.811967	0.746561	0.749991	0.894586
0.652074	0.604369	0.573476	0.634572
0.705949	0.843425	0.774576	0.584285
0.779502	0.684928	0.763013	0.269206
0.62361	0.772241	0.651478	0.451039
0.743729	0.802689	0.720969	0.825978
0.755389	0.735147	0.806284	0.670373
0.536776	0.258857	0.764206	0.482138
0.79182	0.820722	0.848583	0.547603
0.778098	0.204749	0.570987	0.57976
0.762886	0.732747	0.763245	0.597103
0.686011	0.727497	0.720451	0.685397
0.743054	0.673035	0.727743	0.721608
0.72763	0.832779	0.759093	0.657803
0.686434	0.758074	0.768386	0.781459
0.745985	0.702548	0.734405	0.684813
0.716948	0.602415	0.406088	0.573767
0.671527	0.699214	0.723702	0.686956
0.751837	0.871824	0.385581	0.54766
0.727992	0.697611	0.72285	0.520741
0.612332	0.664154	0.195391	0.561551
0.675856	0	0.683368	0.751005
0.764756	0.874671	0.744293	0.697947
0.782839	0.739833	0.737381	0.594879
0.739918	0.642819	0.666774	0.671939
0.678112	0.841991	0.705019	0.609998
0.782782	0.762625	0.828433	0.666198
0.802505	0.714429	0.717758	0.719592
0.68764	0.722497	0.752153	0.658979
0.628837	0.832963	0.707124	0.39129
0.510908	0	0.500763	0.713801
0.721139	0.780198	0.711928	0.565654
0.643514	0.730605	0.65572	0.639932
0.796534	0.689584	0.531263	0.77112
0.337514	0.62701	0.617174	0.520003
0.776619	0.677064	0.873997	0.658308
0.84373	0.708753	0.556143	0.797342
0.733241	0.750387	0.684642	0.743436
0.758978	0.387943	0.744685	0.726157
0.739055	0.698909	0.750898	0.532753
0.745119	0.844113	0.713459	0.592977
0.66587	0.761571	0.677965	0.787153
0.654055	0.567421	0.801524	0.773392
0.732762	0.653085	0.617476	0.682984
0.73983	0.802522	0.480897	0.828493
0.692643	0.784852	0.863674	0.731377
0.815245	0.867124	0.689033
0.302932	0.855559	0.729744	0.841436
0.662644	0.760335	0.722614	0.502212
0.76533		0.295807	0.603847
0.693116		0.726807	0.565554
0.769409		0.789848	0.59652
0.730828		0.2673	0.690025
0.81826		0.741654	0.840961
0.596076		0.843154	0.631562
0.587147		0.687273	0.641772
0.803951		0.648273	0.631734
0.675179		0.639429	0.577765
0.718599		0.635553	0.616325
0.746173		0.712724	0.662703
0.620534		0.824331	0.628934
0.542168		0.729861	0.174013
0.786384		0.692617	0.631876
0.742331		0.672136	0.723384
0		0.693514	0.664514
0.777851			0.731948
0.868251			0.652886
0.755224			0.509145
0.74651			0.703449
0.74503			0.545455
0.792273			0.782238
0.672886			0.647632
0.587195			0.529283
0.519735			0.862235
0.652131			0.730539
0.715552			0.667897
0.672685			0.786979
0.772804			0.410187
0.722196			0.558506
0.832044			0.661677
0.828576			0.468109
0.734548			0.25468
0.842608			0.728458
0.758373			0.671872
			0
			0.695527
			0.553858

## Sheet: K
Glc	LKB1i	Glc+Oligo	Glc+Oligo+LKB1i
0.721803	0.78966	0.61035	0.535328
0.740949	0.906818	0.812848	0.760653
0.808984	0.722908	0.677567	0.623421
0.757802	0.723629	0.756489	0.864629
0.73734	0.736011	0.900077	0.665452
0.665438	0.719103	0.701526	0.652113
0.723291	0.811254	0.832513	0.710462
0.768288	0.743388	0.792758	0.734884
0.697456	0.714293	0.664765	0.786369
0.701112	0.655204	0.799385	0.776391
0.726553	0.725849	0.709593	0.527462
0.779471	0.761602	0.270145	0.720607
0.699582	0.785238	0.765286	0.57857
0.73899	0.760488	0.740637	0.771147
0.738314	0.752657	0.884034	0.677895
0.723521	0.715722	0.903905	0.755449
0.734	0.684545	0.78794	0.696998
0.671716	0.806604	0.832627	0.836256
0.714575	0	0.3837	0.639042
0.762316	0.810173	0.80163	0.644736
0.762301	0.762308	0.663156	0.694666
0.80621	0.808785	0.787935	0.674372
0.684849	0.803437	0.766088	0.795648
0.733088	0.717253	0.765259	0.78395
0.763477	0.657389	0.764696	0.597752
0.704631	0.746041	0.68134	0.686279
0.773648	0.146031	0.595945	0.758715
0.708926	0.71892	0.602082	0.82361
0.742686	0.792677	0.704745	0.843672
0.741647	0.741663	0.6407	0.494915
0.848918	0.780895	0.721493	0.626664
0.722784	0.722517	0.73695	0.841026
0.836937	0.6903	0.770864	0.812117
0.694597	0.789171	0.775458	0.759615
0.84449	0.723257	0.712688	0.770293
0.567593	0.745295	0.634942	0.639733
0.693552	0.680265	0.802218	0.80736
0.796269	0.8363	0.735374	0.431
0.724792	0.826896	0.827277	0.642434
0.789003	0.876479	0.714203	0.315898
0.644364	0.732768	0.636122	0.616074
0.74599	0.773597	0.725132	0.67291
0.692991	0.686199	0.683283	0.54081
0.753679	0.74702	0.488573	0.765026
0.666456	0.68828	0.691034	0.731302
0.795806	0.763574	0.732744	0.704616
0.786252	0.804551	0.756454	0.75611
0.687561	0.701772	0.734533	0.847966
0.719282	0.798296	0	0.741627
0.682374	0.768504	0.699653	0.766985
0.690963	0.738581	0	0.515635
0.712402	0.836715	0.805902	0.574516
0.681463	0.786227	0.774033	0.22073
0.750759	0.719277	0.707303	0.738811
0.703968	0.779904	0.828812	0.944386
0.730959	0.741539	0.580864	0.678158
0.76519	0.278249	0.65599	0.711442
0.694407	0.751459	0.808528	0.680087
0.415767	0.640026	0.580982	0.680856
0.650776	0.749255	0.720597	0.921019
0.758434	0.754234	0.671586	0.595317
0.737448	0.765657	0.60965	0.694828
0.751133	0.822813	0.715933	0.818274
0.76361	0.793801	0.861416	0.772064
0.606429	0.787992	0.794909	0.695621
0.757125	0.616703	0.88072	0.708629
0.649493	0.764213	0.551109	0.809763
0.70934	0.773362	0.80903	0.795219
0.795251	0.720519	0.854865	0.737877
0.784998	0.791864	0.45141	0.539252
0.745069	0.691432	0.764964	0.596411
0.578838	0.756585	0.744924	0.684171
0.748534	0.586675	0.761505	0.770225
0.714754	0.865552	0.697127	0.553035
0.633101	0.818108	0.813309	0.406853
0.703766	0.221811	0.79821	0.477252
0.729389	0.710332	0.699052	0.854189
0.735924	0.706336	0.82062	0.721684
0.617975	0.246348	0.516381	0.682158
0.715268	0.704476	0.202734	0.549133
0.685362	0.250521	0.671218	0.754784
0.807336	0.626431	0.771678	0.889292
0.77556	0.713935	0.758819	0.817722
0.688005	0.315051	0.601041	0.626295
0.755117	0.767286	0.426693	0.677888
0.739732	0.266772	0.802592	0.801522
0.654503	0.794237	0.807999	0.741882
0.698587	0.891523	0.798923	0.638959
0.649085	0.673015	0.722322	0.721485
0.774724	0.7779	0.702566	0.75369
0.685186	0.785357	0.770391	0.767767
0.648163	0.712595	0.659356	0.898936
0.672194	0.761841	0.813658	0.76573
0.742574	0.701163	0.67084	0.657978
0.676055	0.66759	0.680363	0.458036
0.72516	0.719394	0.805225	0.711022
0.729529	0.797039	0.580985	0.596588
0.767639	0.44801	0.849101	0.466318
0.727497	0.778325	0.828998	0.86454
0.703667	0.79942	0.828599	0.553178
0.682552	0.706285	0.763452	0.647198
0.685713	0.76063	0.851841	0.555001
0.748575	0.749049	0.950703	0.544425
0.701131	0.816474	0.828568	0.633593
0.718019	0.705105	0.622172	0.456424
0.683207		0.439789	0.746597
0.643189		0.746397	0.470763
0.657514		0.84944	0.752061
0.749053		0.692206	0.750408
0.708418		0.739716	0.677809
0.674194		0.706404	0.711827
0.694973		0.844552	0.760469
0.622631		0.519655	0.552082
0.668031		0.751136	0.479321
0.77387		0.719601	0.735781
0.75891		0.798221	0.657901
0.73928		0.755982	0.693508
0.673855		0.761928	0.74328
0.747275		0.717952	0.780335
0.761914		0.67147	0.716031
0.700129		0.747726	0.764843
0.716014		0.674088	0.703133
0.766405		0.692589	0.644229
0.661673		0.790492	0.63279
0.764664		0.721228	0.548192
0.68312		0.890893	0.66523
0.824373		0.691321	0.730135
0.681774		0.728151	0.919165
0.711815		0.841043	0.701497
0.67598		0.77387	0.766212
0.757878		0.726913
0.680378		0.812059
0.715241		0.882297
0.692532		0.57251
0.742199		0.77883
0.819884		0.354311
0.761893		0.767142
0.715818		0.787324
0.62002		0.745254
0.654819		0.6699
0.59064
0.751093
0.718034
0.750092
0.749353
0.774916
0.689434
0.760865
0.782076
0.688081
0.600492
0.692606
0.667875
0.729224
0.681389
0.794792
0.661853
0.657248
0.742598
0.763313
0.761712
0.74311
0.704535
0.703163
0.846201
0.824151
0.721602
0.704887
0.771535
0.308086
0.73156
0.753988
0.631204
0.695462
0.739629
0.576817
0.754139
0.610869
0.733581
0.854581
0.685396
0.716111
0.730167
0.699655

## Sheet: L
	AMP							ADP							ATP
Ctl	20.9011	14.5646	19.1976	14.0878	7.52623	4.87453	5.47531	27.6777	28.9086	27.0208	26.2434	12.5597	9.8774	9.59546	51.4212	56.5269	53.7815	59.6688	79.9141	85.2481	84.9292
Oligomycin	28.7815	36.156	26.8501	20.776				36.3902	39.9845	37.8362	39.0546				34.8283	23.8596	35.3137	40.1694
5-FU	11.5975	8.19327	4.78507					15.4043	13.0226	12.5912					72.9983	78.7841	82.6237

## Sheet: Q
GMP	GMP (Pfkfb3i)	MEP	MEP (Pfkfb3i)	CMP	CMP (Pfkfb3i)	CLP	CLP (Pfkfb3i)
0.607105	0.252636	0.691721	0.147417	0	0	0.496765	0.457193
0	0.348442	0.64516	0.420399	0.725474	0.474761	0.583993	0
0	0	0.301757	0	0.495593	0.255378	0.408553	0
0	0.395183	0.682474	0.708563	0.564526	0	0.644768	0
0.583086	0.658936	0.769761	0	0	0.489115	0.632898	0.591542
0.616582	0	0.495593	0	0.517367	0.379964	0.646079	0
0	0	0.640048	0.591525	0	0	0.656233	0
0.738475	0.088808	0.573113	0.305499	0.119161	0.572707	0.650668	0
0.511301	0.644407	0.663681	0	0.633344	0.372905	0.420568	0
0.612958	0.485414	0	0.479067	0.410236	0.583155	0.749436	0
0.518743	0.458406	0.68569	0.304324	0.446352	0.62777	0	0.582766
0	0	0.797906	0.659008	0.674851	0.417106	0.230181	0.289296
0.584939	0.512582	0.693084	0	0.583421	0	0.3022	0.358952
0.687	0.339975	0.546229	0.10006	0.665367	0.298287	0.588585	0.176658
0	0.456302	0.506897	0.862242	0.579696	0.65621	0.733338	0.325254
0	0.572437	0.784926	0.604355	0.58543	0	0.61087	0.44746
0	0	0.742922	0.668839	0.178228	0.470125	0.577616	0.186085
0.683198	0	0.60676	0	0	0.5501	0.654717	0
0.600781	0.596924	0.678707	0	0.452676	0.624107	0.640983	0.705606
0	0.548241	0.613372	0.276582	0.667995	0	0.715023	0.547681
0	0.517867	0.397383	0.358234	0.264294	0.174431	0.637866	0.314619
0.319934	0.353787	0.605276	0.27892	0.701736	0.51035	0.705141	0
0.616177	0	0.69323	0	0.582905	0.414733	0.536684	0.447732
0.567317	0.56501	0.249627	0	0.458298	0.443488	0.635502	0
0.524702	0	0.55589	0.540736	0.414102	0.259583	0.605854	0
0.713902	0.583118	0.671197	0	0.583398	0.363855	0.561477	0
0.605398	0	0.419458	0.325567	0.680881	0.225863	0.597983	0
0.596177	0	0.832445	0	0.676471	0.60537	0.82333	0
0	0.546673	0.804628	0.871387	0.708573	0.38453	0.669103	0
0.625121	0	0.736483	0	0.422033	0	0.695997	0
0.591417	0.652125	0.658668	0.173056	0	0.398188	1.0595	0
0.673971	0.405731	0.498627	0.318508	0.687695	0	0.603838	0.155364
0.500166	0.584665	0.615593	0	0.658668	0.441886	0.726739	0
0.486564	0	0.792997	0.3504	0.593549	0	0.624327	0.737772
0.648789	0	0.547693	0.327415	0.687433	0.517993	0.735663	0
0.557249	0	0	0.682535	0.665611	0.580665	0.619369	0.134544
0.660119	0.286527	0.383021	0.544802	0.667097	0.383443	0	0
0	0	0.524906	0.618195	0	0.386323	0.684015	0
0.574461	0.315162	0.483654	0	0.624792	0.473134	0.464178	0
0.657917	0.527852	0.411242	0	0	0	0	0
0	0.494472	0.667273	0.687445	0.655493	0	0.662875	0
0.566765	0	0.83055	0.623617	0	0.570739	0.68659	0
0.529928	0	0.240305	0	0	0	0.627065	0
0.552987	0.381379	0	0.160535	0.588763	0.533576	0.579086	0.297192
0.519137	0	0	0.601304	0	0.381449	0.730363	0.723979
0.653605	0.129062	0	0.412857	0.383692	0	0.671636	0
0	0	0.451862	0.620286	0	0	0.416809	0
0.615416	0.386323	0.690098	0	0.688106	0	0.432304	0.229142
0	0.563566	0.699073	0	0	0	0.662609	0
0.519738	0	0.495269	0.3317	0	0	0.696237	0.256309
0	0.454272	0.408936	0	0.408936	0.220522	0.687334	0.568748
0	0	0.723088	0	0.712311	0.141301	0.660058	0.606835
0.584786	0	0.659338	0.612454	0.43146	0.377189	0.620157	0
0.632851	0	0.76558	0.796151	0.661018	0.551406	0.61454	0.592135
0.531679	0.365959	0.450505	0	0.736099	0.491762	0.637878	0
0	0	0.524639	0.368975	0.730028	0.526154	0.614194	0.539952
0.512488	0.513746	0.595432	0	0	0.479815	0.740231	0.245018
0	0.384109	0.421779	0	0.496692	0.647034	0.706817	0.261909
0.55428	0.332832	0.696531	0	0.216442	0.571995	0.582189	0
0.556186	0	0.409782	0.69261	0.743323	0	0.69927	0
0.662065	0	0.694152	0.511332	0.64382	0	0.386839	0
0	0.698056	0.683479	0.430393	0.576531	0	0.604731	0
0.600781	0	0.419833	0	0.536124	0.228622	0.769882	0.463717
0	0	0.772831	0	0	0	0.625505	0
0.477754	0.564936	0.451969	0	0.433388	0.469556	0.661384	0
0.545101	0.268717	0.562623	0.695859	0.593025	0	0.738434	0
0.488483	0	0.2857	0.596171	0.584793	0	0.696531	0
0.593656	0.438131	0.487142	0.655597	0.397165	0.51474	0.560965	0.424907
0.616898	0.612039	0.600589	0.619567	0.393768	0	0.796261	0.697651
0	0.575113	0.246022	0	0	0	0.678926	0
0.576531	0.541941	0.683979	0.50762	0.527208	0	0.6795	0
0.363371	0.376063	0.509703	0.223162	0.68234	0.546637	0.616646	0.163135
0.584793	0	0.483593	0	1.46363	0	0.653439	0.71944
0.240913	0	0.66022	0.758791	0	0	0	0
0.636316	0	0.456911	0.569099	0.632704	0	0.665494	0.45175
0.594534	0.471887	0.514526	0	0.466311	0	0.407152	0.259134
0.707298	0.41659	0.64367	0	0	0	0.232538	0
0.500345	0	0.710714	0	0	0.160535	0	0.336598
0	0.599134	0.5455	0.664858	0.686094	0.426935	0.657729	0
0.546279	0.433567	0.610707	0.683359	0.692787	0.590047	0	0.471727
0.61066	0	0.685485	0	0.638165	0	0.224535	0
0.636987	0	0.413703	0.270792	0.715579	0.490295	0.660979	0
0.583321	0.500558	0.515746	0.595521	0.505733	0	0.571926	0
0.211201	0.526418	0.640247	0	0.195305	0.139859	0.119123	0
0.551822	0.483954	0.624406	0	0	0.34829	0.694994	0
0.528572	0	0.329695	0.452196	0.333528	0.639832	0.647045	0.380814
0.542479	0.46322	0.573662	0	0	0.411461	0.615431	0.347799
0.491554	0.537349	0.733609	0.519302	0.52815	0.583476	0.199731	0
0.521709	0.588615	0.64829	0.359578	0.450243	0.842872	0.710228	0.742799
0.630151	0	0.493507	0.302039	0.623538	0.434088	0	0
0.568736	0	0.613799	0.712687	0.607698	0	0	0.597584
0.674058	0.387818	0.779795	0.355598	0.608429	0	0.57195	0
0.572699	0.562287	0.607944	0.594502	0.595631	0	0.608718	0
0.469264	0	0.52167	0	0	0	0	0
0.482708	0	0.674206	0.635774	0.671364	0.368975	0.611308	0.614759
0.564812	0.519504	0.570457	0	0.414588	0.441802	0.558006	0.632647
0.189468	0	0.446938	0	0.597056	0.438293	0.528898	0
0.54913	0.271798	0.466478	0.813671	0.351855	0	0.768374	0.375439
0.402414	0.670964	0.473096	0.474944	0.458235	0.761554	0.685154	0
0.547778	0.572494	0.58314	0.351077	0.584773	0	0.271733	0.416887
0.558309	0	0.414588	0.581784	0	0	0.601683	0.364136
0.541375	0.453214	0.745901	0	0	0.592093	0.537683	0.16968
0	0.302853	0.776534	0.404927	0.076063	0	0.664276	0.695036
0.624994	0.532977	0.76579	0.212567	0	0	0.737226	0.157416
0.537094	0.449913	0.705295	0	0.64329	0.297935	0.694871	0
0.555281	0.408301	0.351855	0.53009	0.684352	0.510928	0	0.304612
0.692886	0	0.62238	0.375568	0.755555	0.368244	0	0
0	0.477606	0.416596	0.57678	0	0	0	0
0.498729	0.522173	0.665176	0	0.324722	0	0.482569	0
0.299396	0.472088	0.528231	0	0.593728	0	0.62447	0.457002
0.545163	0	0.457051	0.563957	0.506645	0.568857	0.637654	0
0.579733	0	0.449976	0.51579	0.3806	0.474425	0.727157	0
0.708036	0	0.686261	0.737283	0	0.558093	0.622833	0
0.570014	0.490295	0.704237	0.720474	0.546892	0.584448	0.691891	0.248917
0	0.450487	0.641151	0.473541	0	0	0.683583	0.54355
0.584538	0.178424	0.667093	0	0.666589	0	0.735894	0
0.543146	0	0.696106	0.451373	0	0.582436	0.693424	0
0.632365	0.435322	0.571066	0	0	0.542522	0.72235	0
0	0.296087	0.523212	0	0.51543	0	0.645063	0.307812
0.59713	0.608925	0.673895	0.544664	0.605678	0.483765	1.33402	0.615665
0.485001	0.607413	0.785699	0.702009	0.277122	0	0	0
0.496446	0	0.569837	0.484019	0.653474	0.214742	0	0.475251
0	0.531227	0.423805	0	0.629997	0.549713	0.718146	0
0.584773	0	0.633469	0	0.630744	0.521172	0.520624	0
0	0.592073	0.63352	0.222426	0.215527	0	0.493819	0
0	0	0.682039	0.248792	0.519505	0	0.6369	0
0	0	0.592855	0.259407	0.638461	0.633029	0.707825	0.305622
0	0	0.449607	0.857444	0	0	0.630643	0.611288
0.596914	0	0.552951	0	0.712016	0.507024	0.766776	0.610824
0	0	0.808541	0	0.599821	0.34258	0.618573	0
0	0.413524	0.609896	0.633814	0	0.388815	0.647181	0
0	0	0.481604	0.687472	0.189791	0	0.588534	0
0	0.438293	0.576634	0.342606	0.725055	0.375851	0.595691	0.695685
0.610996	0.151044	0.558838	0.323533	0.635582	0	0.675896	0
0.539221	0.567181	0.754797	0.602421	0.635607	0	0.604673	0
0.598649	0.549224	0.705906	0.619157	0.527257	0.457207	0.682793	0
0.537923	0.426224	0.678691	0	0.659725	0	0.656061	0.240235
0.629696	0.527359	0.431883	0.606249	0.624019	0.399159	0.535168	0
0.59178	0.761554	0.623479	0	0	0	0.742461	0
0.291656	0.171639	0.709152	0.543184	0.320363	0	0.667109	0
0.525761	0.620504	0.616655	0	0	0.099575	0	0
0	0	0.800445	0.50427	0	0.483093	0.573276	0
0.572966	0	0.499561	0.693823	0.353341	0	0.560937	0
0	0	0.320117	0.533912	0.582254	0	0.641507	0
0.370346	0.558136	0.479295	0.586136	0.577418	0.650966	0.696462	0.68606
0.671049	0.398452	0.752603	0.699027	0.251073	0.211871	0.159501	0
0.521512	0.514253	0.421092	0.482953	0	0.507188	0.665632	0
0	0.532752	0.418418	0.757783	0.746689	0.444323	0.59361	0
0	0.57801	0.72695	0.597959	0.524878	0.185239	0.358522	0.630232
0	0.406043	0.519505	0.638837	0.609834	0.396398	0.619634	0
0.549451	0	0.284183	0.659587	0	0	0.580894	0
0.646081	0.552875	0.629851	0.355049	0.746939	0.58355	0.555478	0
0.716132	0.517307	0.305964	0.551918	0	0	0.16793	0
0.658785	0.669245	0.597089	0.850084	0.58841	0.360578	0.663989	0.589847
0.622105	0.524646	0.514153	0	0	0	0.709971	0.266868
0.366828	0.503284	0.532703	0.428402	0.535007	0	0.67196	0
0.609479	0	0.62608	0	0	0.45149	0.704974	0
0	0	0.663583	0	0.540641	0.395124	0.411218	0
0.44844	0.15442	0.384287	0	0.612175	0.189316	0	0
0	0	0.482141	0.517761	0.294523	0	0.708704	0
0.635151	0	0.540064	0	0.51358	0.273162	0.595865	0
0.61665	0.543059	0.520255	0.44161	0.513412	0	0.581178	0
0.657321	0	0.646372	0.344762	0	0	0.617051	0.726237
0.460601	0.420951	0.651135	0	0.604738	0.386098	0.818285	0
0	0.515243	0.647165	0.469289	0.622221	0.321532	0	0
0.656393	0	0	0.282594	0.505627	0	0.533977	0.740137
0.580752	0.577347	0.679349	0	0.454195	0	0.479465	0
0.627616	0	0.353341	0	0.581254	0.645507	0.552814	0.250115
0.559639	0	0.645318	0.551296	0.515359	0.420838	0.611473	0
0.225775	0.439019	0.329084	0.605102	0.614131	0.593783	0.713583	0
0.630613	0.391234	0.602654	0	0.667957	0	0.698852	0
0.606811	0	0.510421	0.660445	0.287174	0	0.730764	0.777488
0.619867	0.37824	0	0.573507	0.574482	0.395092	0	0
0.680925	0.524738	0.459416	0	0.295319	0.506596	0.702508	0.533139
0.38962	0.492965	0.646812	0.463105	0.435134	0.628983	0.609384	0
0.506895	0	0.40345	0	0.565452	0.31716	0.683396	0.677995
0.485198	0.352889	0.581277	0.361582	0.421685	0	0	0
0.579523	0.40602	0.489604	0	0.715801	0.445825	0.385087	0.083392
0	0.538083	0.573485	0.802925	0.599644	0.609219	0.607297	0
0.475343	0.610637	0.638555	0	0.72531	0.662353	0	0
0.301136	0.457161	0.688286	0.520889	0	0	0.602175	0
0	0.646671	0.38443	0.409423	0.669856	0	0.646804	0
0.596961	0.435886	0	0.141208	0	0.361774	0	0
0.541374	0.500643	0.712454	0.82907	0.420587	0.377454	0.580401	0.632168
0.559444	0.430193	0.477582	0.304126	0.51434	0	0	0.995646
0.588577	0.471754	0.543485	0	0.549615	0.635268	0.707674	0
0.648596	0.533159	0.529018	0	0	0.473541	0.678324	0
0	0	0.729991	0.762539	0.738719	0.426047	0.625563	0
0.68304	0	0.533459	0.543936	0.577471	0	0	0
0.522219	0.562419	0	0.235152	0.488278	0	0.745092	0
0.409496	0	0	0.518756	0.377016	0.509013	0	0
0.562661	0.431985	0.241467	0	0	0.746976	0.64682	0
0.53519	0.633699	0.28759	0	0.608511	0	0.651805	0.165191
0	0	0.815215	0.569284	0.324492	0.431746	0.750091	0.349572
0.585262	0	0.53054	0.643836	0.53862	0.280364	0	0.663652
0.575878	0.405637	0.613728	0.240601	0.577843	0.568757	0.603347	0.239953
0.550776	0.615437	0.647757	0	0	0	0.665198	0.300704
0.562001	0.531582	0.447245	0.33218	0	0.516986	0.716205	0.635789
0.458858	0	0.821108	0	0.585752	0	0	0
0.614719	0	0.681048	0.523033	0.481937	0.423581	0.649724	0.649451
0.648596	0.447799	0.612175	0	0	0.505786	0.713558	0
0.520547	0	0.597033	0	0.23762	0.470845	0.667331	0
0.634141	0	0.585423	0.560203	0.69369	0.598566	0.706553	0.689417
0.488572	0.531799	0.805868	0.333498	0.615502	0.497265	0	0
0	0	0.629008	0	0.44044	0.244899	0.587798	0
0	0.690427	0.667912	0	0.60772	0.450114	0.618736	0
0.58841	0.494923	0.687903	0.159532	0.629259	0.42265	0.633316	0
0.337925	0.520853	0	0.434513	0.415438	0	0.616316	0
0.565682	0.4912	0.560951	0.618529	0.540289	0.28015	0.621	0
0.545121	0.466805	0.769977	0.423605	0.551227	0.184412	0	0
0.252386	0	0.740148	0.236862	0	0.404354	0	0
0	0.461027	0.766015	0.618586	0.748766	0.537178	0.391748	0
0	0.551246	0.66987	0.305626	0.682358	0	0.69508	0
0	0	0.605597	0	0.53084	0.614078	0.617096	0
0.582478	0	0.438254	0	0.698828	0	0.827018	0
0.579297	0.469209	0.780446	0	0.514135	0.488717	0.588389	0
0	0.459567	0.656762	0	0.590969	0	0.720172	0
0.672248	0.315222	0.458174	0.674142	0	0.432183	0.568706	0.211368
0.610021	0	0.70819	0.274535	0.250895	0.512389	0.450637	0.814359
0.592894	0.426713	0.665563	0	0	0	0.661959	0
0.328657	0.472316	0.357854	0.652259	0	0	0	0
0	0.489213	0.608139	0	0.676234	0	0.497829	0
0.612175	0	0.674098	0.275795	0.424237	0	0.757659	0.296347
0	0	0.676307	0.5222	0.576788	0.535766	0.643725	0.574502
0.650275	0	0.601152	0.693675	0.63173	0	0.468252	0
0.530364	0.273125	0.694093	0.630745	0	0	0.681418	0.673615
0.675382	0.488802	0.488713	0.223712	0.571665	0.679738	0.723626	0
0.500971	0.530809	0.833116	0.569335	0.530699	0.591893	0.737609	0
0.481273	0	0.51464	0.57959	0.583393	0	0.262146	0.643749
0	0.556682	0.72531	0	0.626186	0	0	0
0.569786	0.649536	0.448291	0	0.695733	0	0.686738	0
0.635313	0	0.684218	0	0.588743	0	0.475153	0.909775
0	0.614084	0.700082	0.548024	0.370942	0.446129	1.17371	0.416864
0	0.691502	0.434661	0.673888	0.58331	0	0.614224	0.39039
0.547108	0.325566	0.578699	0.385265	0.306041	0	0.221097	0
0.598374	0.455361	0.429736	0	0	0	0.652159	0
0.612016	0	0.714743	0.225949	0.725456	0	0.580164	0.775313
0.654143	0.250351	0	0	0.523775	0.254921	0.7858	0
0	0.425155	0.668887	0.414539	0.606997	0	0.700369	0
0.621801	0.115802	0.586778	0.719048	0.594004	0.382458	0.614314	0.230735
0	0	0.549655	0	0	0	0.919225	0
0.595604	0.585472	0.792825	0.376129	0.772473	0	0.57937	0
0.524321	0	0.831988	0	0.460364	0.296749	0.665692	0.609317
0.56747	0.350552	0.748597	0.339133	0.611352	0	0.580163	0.343412
0.498819	0.406697	0.592071	0.283704	0	0.430781	0.715606	0
0	0	0.313532	0.668666	0.414299	0	0	0
0.62506	0.402941	0	0.33101	0.58763	0.241876	0.597875	0.386489
0.520758	0.615923	0.491593	0	0	0.465883	0.374457	0
0.557579	0.525079	0.551326	0	0.633791	0.145479	0.702518	0
0	0.508871	0.714715	0	0.235613	0.621156	0.516835	0
0.324307	0.651817	0.710007	0.295049	0	0.60014	0	0
0.759154	0.415732	0.684527	0.462273	0.643678	0	0.620237	0
0.592795	0.514018	0.565745	0.334231	0	0.201477	0.714834	0.63482
0.511051	0	0	0.121277	0.274019	0.30377	0.645212	0
0.529532	0	0.751904	0.180079	0.693466	0	0.574642	0
0	0	0.676481	0.69664	0.614652	0.377991	0	0.238492
0.595991	0.252969	0.658202	0.485068	0	0	0.664143	0.266804
0	0.160164	0.561292	0	0.672152	0.551389	0.639529	0.365748
0	0.248169	0.599403	0.580482	0.574794	0.450768	0.592898	0
0	0.521413	0.652537	0	0.658138	0	0.723711	0
0.602828	0.47313	0.704119	0.566347	0.450104	0.48942	0.724928	0.661134
0.6659	0	0.612435	0	0.57504	0.427018	0	0
0	0	0.735492	0.517935	1.06628	0	0.494713	0
0.66865	0	0.605111	0.512907	0.258309	0	0.207039	0.613774
0.615234	0.536267	0.47048	0	0	0.428402	0	0
0.710167	0.541538	0.812363	0.524154	0	0.315604	0	0.499162
0.570159	0.617869	0.704965	0	0.51028	0.347181	0	0.269273
0.506501	0.471933	0.666131	0.401233	0	0	0.584366	0.337268
0.655153	0.460279	0.717121	0	0	0	0.661755	0
0.512544	0	0	0.703421	0.678525	0	0.602425	0.255795
0	0.28376	0.701289	0.601062	0.546366	0.344762	0.695459	0.630069
0.324923	0.478912	0.189394	0.305133	0	0.279883	0.725746	0.163194
0.603372	0.172551	0.680612	0.743247	0.445515	0	0.77618	0
0.609294	0.609863	0.657848	0.176916	0	0.306674	0.703349	0.6699
0.572016	0	0.334125	0.154017	0	0	0.64831	0.731896
0.632859	0.24772	0.57681	0	0.293057	0.495796	0.233554	0
0	0	0.613562	0	0.629415	0.401699	0.765543	0
0.676229	0.448059	0.415438	0.491741	0.528389	0	0.545071	0
0.594463	0.462881	0.492361	0.506393	0	0	0.340079	0.326012
0.598316	0.248373	0.742106	0.310077	0.643247	0	0.643544	0.627684
0.597053	0.538233	0.307078	0.709042	0.568063	0	0.720042	0
0.46945	0	0.40856	0	0.665516	0.450786	0.699805	0
0.679569	0.392275	0.432196	0	0	0	0.659761	0.555709
0.774415	0.269954	0.696062	0	0.625139	0	0.721296	0
0.497818	0.586313	0.685772	0	0.71548	0	0.232072	0.272787
0.583761	0.401464	0.417151	0.374585	0.458657	0.207325	0.544689	0.771524
0.478784	0.469532	0.662681	0.623049	0.546724	0.206246	0.699279	0.43029
0.589341	0	0	0.375377	0.643585	0.596095	0.634472	0
0.554749	0.495904	0.724337	0.432638	0.655472	0	0.510686	0.226747
0.630722	0.593787	0.55763	0.524907	0.389694	0.463105	0.639112	0
0	0	0.501463	0.418995	0	0	0.738957	0
0.492734	0.524255	0.679722	0	0.579028	0	0.30645	0.184557
0.560766	0.485936	0.574713	0	0.580126	0.356651	0.598193	0
0.644249	0.539062	0	0.439509	0	0.321487	0.66146	0.459123
0.119174	0	0	0	0	0	0.484057	0
0	0	0.370942	0.5603	0	0	0	0
0.623928	0	0.374091	0.768744	0.601255	0.477555	0.538654	0.916103
0.457968	0	0.698292	0	0.347768	0.529899	0	0.036467
0.582484	0.410331	0.726253	0	0.605981	0.404529	0	0.372255
0.581478	0	0.623285	0.487238	0.557379	0.490575	0.717439	0.666669
0	0	0.306041	0.438964	0	0.459809	0.651068	0
0.527619	0	0.472405	0.564677	0.62833	0.419238	0.666942	0.190572
0.510287	0.459824	0.577254	0.860834	0	0	0.702807	0
0.483559	0.591883	0.59808	0.704788	0.596634	0	0	0.441922
0	0.498476	0.671708	0	0	0	0	0.317977
0.183872	0	0.654868	0.270238	0.16867	0.549947	0	0.592779
0.54223	0.286555	0	0.333745	0.370504	0.453091	0.354914	0
0.604699	0.451149	0.40022	0.306981	0.461445	0.525568	0.74585	0.180613
0	0	0.37825	0	0.607427	0	0.453202	0
0	0.668725	0.609912	0	0	0	0.591003	0
0.555582	0.320797	0	0.63857	0.647402	0	0.716091	0.225113
0.421988	0.524153	0.664376	0.53873	0.491015	0	0.589834	0
0.522589	0	0.622521	0.35982	0.633277	0	0.609064	0
0.544232	0.485678	0.77938	0.247858	0.805153	0	0.6248	0
0.708281	0.601584	0.806213	0.50354	0	0.513713	0.64572	0.600778
0	0.607419	0.643678	0	0.738618	0.37182	0.63627	0
0.539106	0	0	0	0.574153	0.545315	0.687676	0
0	0	0.343472	0.17438	0.559599	0	0.579433	0
0.597557	0.382458	0.560831	0	0.525638	0.637136	0.630091	0.074824
0.528131	0.391835	0.630477	0	0.507729	0.213626	0.67157	0
0	0.443173	0.754514	0	0.617731	0.277122	0.658315	0
0	0.080829	0.514647	0	0	0.545759	0.947671	0
0.636355	0	0.472782	0.345411	0.578947	0.469077	0.192906	0
0	0.475052	0.668458	0	0.581384	0	0.381168	0
0.452151	0.418703	0.661505	0	0.46551	0.372145	0.743948	0
0.505635	0.454828	0.482631	0	0.534421	0	0.547254	0.274378
0	0.472292	0.635421	0	0	0.692902	0.572105	0
0	0.299013	0.429705	0.537854	0.785741	0	0.67316	0
0.599383	0	0.259373	0.083121	0	0	0.628645	0
0.620615	0.556673	0.639825	0.268956	0.577249	0	0.543121	0
0.532576	0	0.618161	0.622395	0	0.500652	0.628929	0.510526
0	0	0.680458	0	0.39835	0.452469	0.719494	0
0.550715	0.401169	0	0.730122	0	0.495508	0.666721	0
0.587959	0.479001	0.735783	0	0.598545	0.4521	0.653526	0
0.657316	0	0.693523	0.609135	0.569008	0.190353	0.606398	0
0	0.534033	0.544823	0	0	0.50228	0.613	0.485774
0.531753	0.405933	0.80029	0.440031	0.409233	0.206714	0.489983	0.626971
0.373164	0	0.223732	0.352075	0.578531	0	0.735544	0
0.650134	0	0.690936	0	0	0.528872	0.638301	0.623861
0.559584	0.418145	0.656303	0.370921	0.641109	0	0.692541	0
0.549257	0	0.854429	0.199309	0	0.529326	1.0201	0
0.456958	0.551389	0.475648	0.628804	0.580099	0	0.648165	0
0.278991	0	0.509053	0.733852	0.65222	0.12366	0.583935	0.469216
0.560119	0	0	0.567896	0.417037	0.465772	0.718067	0.428362
0.533818	0.710487	0.481797	0.569232	0.307614	0.482184	0.344696	0.488955
0.581697	0	0.647723	0	0.504096	0.057734	0.253623	0
0	0	0.77498	0.598516	0.556327	0	0.709707	0.608942
0.543279	0.26301	0.648175	0.38487	0.617192	0	0.696515	0
0.534473	0	0.709741	0.525379	0.44756	0.652863	0.523819	0
0	0.470054	0.582285	0.355005	0.705678	0.431013	0	0
0.604273	0.510962	0.426824	0.211099	0.459258	0.459766	0.791221	0
0.632953	0.587309	0.672874	0	0.398867	0.382539	0	0
0.503718	0.348327	0	0.492728	0	0.570507	0.552168	0.158788
0	0.526833	0.567694	0	0	0	0	0
0	0.43562	0.641868	0.310334	0	0	0.610795	0
0.624381	0.418643	0.649365	0.685841	0.591266	0	0.633442	0.607977
0	0.608157	0.5129	0.425056	0	0.201797	0.60983	0.219867
0.623343	0.612861	0.634775	0	0.652075	0.673888	0.735158	0
0	0.57059	0.828561	0.440163	0.620444	0	0.64387	0.343098
0.599821	0.604391	0.309207	0.178551	0.463753	0.351916	0	0.551611
0	0	0.466927	0.549535	0.635309	0	0.578911	0
0	0.500259	0.626703	0.64476	0.665499	0	0.658335	0
0.617173	0	0.56067	0	0.655799	0	0.322393	0
0	0.629287	0.580514	0.591284	0.657453	0	0	0
0	0.539068	0.547937	0.337752	0.531132	0.32496	0.738887	0
0.592807	0	0.621534	0	0.457519	0.627151	0.529751	0
0.506694	0.316534	0.558607	0.604981	0.516581	0.522473	0.598694	0
0.56872	0	0.623473	0	0.59136	0.426701	0.235882	0
0.577172	0.47392	0.286622	0.252146	0.651775	0		0
0	0.462785	0.667119	0.197939	0	0		0
0	0.57442	0.568728	0.572248	0.643201	0.520557		0
0.521773	0	0.617117	0	0.569331	0.247561		0.299314
0	0.668565	0.697907	0	0	0.515478		0
0	0.517232	0.692364	0	0.601412	0.339133		0
0	0	0.644939	0.324521	0.590629	0.365557		0
0.593715	0.571262	0.454201	0.440102	0.526892	0.524573		0
0.541308	0.561798	0.722	0	0.396416	0		0
0	0	0.727408	0.493818	0.591967	0.564514		0
0	0.43764	0.71939	0	0	0.177381		0
0.612659	0	0.399911	0.305379	0.748448	0		0
0.785614	0.60556	0.71548	0.762455	0	0.205898		0
0.587916	0	0.536796	0.126887	0.617442	0.407497		0
0	0	0.717941	0.43715	0.631496	0.505836		0
0.571637	0.447045	0.675418	0	0.650651	0		0
0.653637	0.449097	0.415917	0.598563	0.313678	0.350264		0
0.451046	0.376859	0.728654	0.318199	0.556092	0.335976		0.102645
0	0.569771	0.624241	0.603973	0.589835	0		0
0.590376	0.398057	0.609272	0	0.654822	0		0
0	0.32809	0.668636	0	0.437859	0.549716		0
0.360739	0.472884	0	0.674632	0.696643	0.56397		0
0	0.436148	0.629421	0.603967	0.495363	0.451204		0
0.594671	0.394891	0.723891	0	0.483171	0.341001		0
0.674711	0	0.720686	0.449595	0.391477	0		0.138681
0.568244	0.459207	0.528866	0.498474	0.372124	0.626131		0
0.584942	0	0.636034	0	0	0.437417		0
0.524943	0	0.40796	0.260915	0.454022	0.507581		0.357671
0.560042	0.185737	0.439945	0.199117	0.265672	0		0
0.426217	0.418242	0.659981	0	0.476847	0		0.707264
0.436669	0.273495	0	0	0.729219	0.615054		0.252919
0.634147	0.431216	0.435405	0.473795	0.550972	0		0
0.650508	0	0.728158	0.694708	0.676963	0		0.560218
0	0.49536	0.622795	0	0.606754	0		0
0	0.541142	0.457866	0	0	0.317133		0
0.537126	0	0.636809	0.577367	0.315074	0.277695		0
0.487328	0	0.319812	0.215437	0	0.55512		0.605754
0.55819	0.35961	0.603096	0.589263	0	0.509499		0.467863
0	0	0.313838	0	0.421573	0		0
0.530416	0	0.638095	0.714051	0.667401	0.345676		0
0	0.467667	0.493062	0.462888	0.469101	0		0
0.628421	0.524399	0.520403	0.244717	0	0.50356		0
0.546398	0.48743	0.714048	0	0.653523	0		0.605989
0.590512	0.622177	0	0.671985	0	0		0
0	0.703599	0	0.73146	0.517949	0		0
0.732728	0.435007	0.768875	0.680571	0.676694	0.497		0
0.613012	0.164936	0.578831	0	0.182957	0.624134		0.205952
0.642953	0.557375	0.661321	0	0.654793	0.387326		0
0	0	0	0.29718	0	0.297109		0
0	0.467115	0.654535	0.237067	0.662025	0.50173		0
0.62594	0.500924	0.637181	0	0.619411	0		0
0.592918	0.649338	0.714181	0.660492	0	0.449925		0.412878
0.592184	0.591643	0.782701	0.36018	0.588183	0.460512		0.618081
0.549144	0	0.41463	0	0.604234	0		0
0.330228	0.48388	0.692309	0	0	0		0
0.621187	0.415269	0.413993	0.455147	0.340368	0.234594		0
0.49533	0.489118	0.60123	0.469769	0	0		0
0.605981	0.486827	0.48015	0.447746	0.578452	0		0.425595
0	0.616867	0.534421	0.062137	0.751021	0.22852		0.151255
0.613685	0	0.500223	0.458388	0.585584	0.487184		0.471073
0.592865	0.422777	0.58935	0.5453	0.63066	0		0
0.503913	0.556469	0.726236	0.399648	0.690087	0		0
0.601894	0	0.709736	0.580287	0.057815	0		0
0.637303	0.483555	0.623838	0.418658	0.633378	0.5982		0
0.522031	0.576736	0.474183	0.707297	0.37089	0.512039		0
0.236342	0.6536	0.515035	0	0	0.529052		0
0	0.648413	0.671767	0	0.586509	0.367581		0
0.520128	0	0.389479	0	0.597951	0.413626		0
0.617906	0.345524	0.490697	0.748988	0	0.391473		0
0.608862	0.51294	0.648254	0.738003	0.47679	0		0
0	0.441488	0.721066	0.340058	0.493837	0		0.365617
0.656303	0.629996	0.565293	0	0.560701	0.299499		0.403139
0.559536	0.464857	0.2612	0.331867	0.650389	0.611544		0
0	0.343218	0.411839	0.488805	0.553143	0		0
0.628864	0.430907	0.680351	0.471536	0.641181	0		0.48214
0	0.536825	0.602864	0	0.49985	0.388517		0
0.617731	0.543763	0.599595	0	0	0.535311		0.289645
0.226806	0	0.408153	0	0	0.62443		0
0.547548	0.461932	0.676609	0.591378	0.504481	0		0
0.547516	0	0.349216	0.319521	0	0.200658		0
0	0.101034	0.726774	0.824912	0.625145	0		0.557712
0	0	0.67041	0.504885	0.525132	0.493611		0
0	0.528348	0.515543	0	0.713526	0		0
0.578947	0.61183	0.569611	0.785901	0.249723	0		0
0	0.497323	0.324428	0.55654	0.344666	0.526438		0
0	0	0.725963	0.674071	0.545062	0.61099		0
0.500855	0	0.282461	0.678717	0.724413	0		0
0	0	0.554064	0.253242	0.161038	0.458433		0
0.594157	0	0.712981	0	0.643658	0.603255		0
0	0.540633	0.594	0	0.545642	0.578518		0.643138
0.595132	0	0.729312	0.514055	0.512051	0		0
0	0.4922	0.549857	0.455423	0.596938	0.231113		0.448984
0.682297	0.352863	0.509459	0	0	0.609538		0.408703
0.552772	0	0.540301	0	0.169129	0.362561		0
0.572237	0.425583	0.743001	0.483915	0.599134	0		0.266235
0.564655	0.431013	0.65728	0.588951	0	0		0
0.422526	0.559401	0.774936	0	0	0		0.6924
0	0.549503	0.528303	0.45989	0.629981	0		0
0.592203	0	0.591266	0.482931	0	0		0
0.544429	0	0.585195	0.253485	0.690179	0.442545		0.702427
0.628637	0.396199	0.743612	0.685781	0.30907	0.397229		0
0.144579	0.475563	0	0.400098	0	0		0
0.650026	0	0	0.71139	0	0		0.347818
0.586526	0	0.51125	0.074768	0.689666	0		0.352925
0.53645	0.598071	0.727276	0.608319	0.511822	0.486077		0
0	0.655987	0.596954	0.489158	0.442553	0		0
0.564126	0.54349	0.657453	0.566793	0	0.639031		0
0.609254	0	0.787666	0	0.668865	0		0
0.448862	0.430532	0.488889	0	0.650023	0		0
0	0.597757	0.563934	0.54197	0.481421	0		0
0	0.458892	0.568306	0.336759	0.554948	0.421063		0.485491
0.538466	0	0.686787	0.608934	0.24712	0.223618		0
0.521057	0.358695	0.531183	0.369211	0.59031	0.500241		0
0	0	0.5143	0	0.406276	0.244782		0
0.490511	0	0	0	0.62455	0.251508		0
0.53927	0.428958	0.387816	0.23473	0.303265	0.526358		0
0.491895	0	0.622297	0.801844	0	0		0
0.481292	0	0.420305	0	0.63827	0		0
0.558257	0.23014	0.591141	0.566219	0	0		0
0.385394	0.457788	0.791549	0	0.684398	0		0.418676
0	0	0.561456	0	0.492618	0.298479		0
0.524396	0	0.646329	0.708872	0.596071	0.358666		0.41235
0.548866	0	0.591967	0	0.53754	0		0
0	0.190101	0.476554	0.390945	0.440277	0		0.30581
0.494831	0.39394	0.466131	0.427336	0.503645	0.072505		0
0.544424	0.616765	0.733317	0.386192	0.46834	0.452403		0
0.695195	0.472865	0.126113	0	0.522853	0.083121		0
0	0.230017	0.502415	0	0.555917	0.327852		0.423223
0.621666	0.549614	0.521028	0	0.446673	0.591431		0
0.672181	0.453848	0.740585	0.365979	0.286093	0		0.338714
0	0.621289	0.707526	0.563007	0.666602	0.393327
0.474285	0.483951	0.484009	0	0.529105	0.325628
0.528464	0.44898	0	0.679397	0.624946	0.459939
0.523025	0.295855	0.765737	0	0.629957	0
0	0.32915	0.827364	0.540975	0.376928	0
0.56232	0.476987	0.680719	0.42119	0	0
0.492933	0	0.200866	0.175575	0.612173	0.511327
0.599316	0.568998	0.637661	0	0.615139	0.301665
0	0.149228	0.691042	0	0.661758	0.582703
0.503086	0.51281	0.391477	0.377893	0.451577	0
0.568319	0.414783	0.561383	0.58242	0.661161	0
0	0.538034	0.372124	0.454869	0.673471	0.513538
0.575882	0	0.519677	0.612025	0.578748	0
0.558582	0	0.716508	0	0.349529	0.089254
0.55884	0.354551	0.536351	0	0.66499	0
0	0.545282	0	0.497645	0.638844	0.628882
0.546801	0.527349	0.476847	0.458066	0.34827	0.325735
0.522974	0	0.458814	0.165568	0.590111	0
0.681443	0	0.465594	0.52692	0	0.582488
0.58329	0.496539	0.668084	0	0.700042	0
0	0	0.376214	0.613618	0.516505	0.355005
0.579362	0.256165	0.654515	0.543012	0.562866	0
0.525098	0.425196	0.461733	0.553958	0.699065	0
0.565383	0	0.510284	0.266864	0.558861	0.577398
0	0.565929	0.607887	0	0.670522	0.211729
0	0.257462	0.653594	0	0	0.375815
0	0.522386	1.06177	0.147434	0.488456	0
0	0	0.686624	0.384304	0.518736	0.400841
0	0.437417	0.334047	0.623069	0.610149	0.685841
0.232385	0	0.694995	0.418747	0.644406	0.535783
0.635706	0.469754	0.653038	0	0.749466	0
0.670469	0	0	0	0.573501	0.621111
0.58056	0.508352	0.579512	0	0.299189	0
0.481292	0	0.670297	0.303236	0.500055	0
0.484157	0.396245	0.446518	0	0.399658	0
0.61953	0.419577	0.804453	0.41449	0	0.506605
0.577782	0	0	0	0.577435	0.440163
0.565039	0.634458	0.747154	0.124621	0.427756	0.500122
0.533421	0.395003	0.361034	0	0.062064	0.202955
0.562019	0	0.432534	0	0.45838	0
0.585663	0	0.465228	0	0	0
0.678803	0	0.46203	0.480127	0	0
0	0	0	0	0.640169	0
0	0.498836	0.606906	0.493754	0.622841	0.785936
0.528899	0	0.7076	0.560037	0.339309	0
0.547615	0.202693	0.612844	0	0.29028	0.254781
0	0	0	0.270349	0.62036	0.556698
0.603352	0.597886	0.489382	0	0.794608	0
0	0.55512	0.680177	0	0.547891	0
0.171779	0.512566	0.65572	0.541448	0	0
0.640565	0.623018	0.62105	0.334488	0	0
0.541213	0.407027	0.617328	0.672053	0.459669	0
0.61184	0.617739	0.590978	0	0.453555	0.590458
0.419887	0	0.668771	0.695195	0.700142	0.281508
0.606377	0.39687	0.722584	0.599232	0.662996	0.475143
0.472408	0.646337	0.751949	0.285765	0.503046	0.532558
0.639186	0.564342	0.64147	0.056557	0.579018	0
0	0	0.469897	0.32729	0	0.48729
0.59512	0	0.729366	0.389893	0.746899	0
0	0.402446	0.551588	0	0	0
0.16689	0	0.716703	0	0	0
0.339488	0.407541	0.478468	0.562255	0.716405	0.408797
0.697467	0.435137	0.601926	0.559185	0.666911	0
0.544255	0.524025	0.472761	0.714616	0	0.550701
0.588401	0	0	0.280444	0.711381	0.562388
0.494748	0	0.472301	0.590031	0.684143	0.434345
0.490524	0	0.505774	0	0.553488	0
0	0	0.537102	0	0.597098	0
0.639439	0.441053	0.613427	0	0.620668	0.522908
0.523557	0.472144	0.720315	0	0	0.291355
0.563902	0.521393	0.358372	0.681026	0.56172	0.318199
0	0	0.657644	0.312287	0.623289	0.549848
0	0.590912	0.621964	0.810813	0	0
0.672592	0.383301	0.390763	0	0.450728	0.309314
0.418773	0.499857	0.54974	0	0.715832	0
0.444704	0	0.757681	0.451757	0.582509	0.277892
0.668954	0.516214	0.259681	0	0.602293	0.505932
0.522225	0.462369	0.533019	0.514416	0.710113	0.656238
0	0	0.736756	0.582502	0	0.51947
0	0	0.609505	0.390901	0	0.610923
0	0.445564	0.642781	0	0.602625	0.576692
0	0.550716	0.498847	0.442816	0.565241	0.29333
0.649377	0.511365	0.444633	0.233863	0.579565	0
0.619613	0.686664	0.709155	0.420674	0.618829	0
0.515533	0.557112	0.685383	0	0.339384	0
0.449841	0.581428	0.648514	0.429064	0.350746	0.547914
0	0.354551	0.727299	0.076187	0.369368	0.428458
0.632548	0.486785	0.652128	0.641602	0.541895	0.36355
0.565404	0	0.763332	0	0.590885	0
0.62341	0	0.398072	0.257426	0.460242	0.530389
0.50369	0.512884	0.197753	0	0.702392	0
0	0.489064	0.43537	0	0.478774	0.634241
0.650342	0	0.641041	0	0	0
0	0	0.685338	0	0.459796	0
0.574589	0.480504	0.504481	0.42644	0.599839	0
0	0.397882	0.618475	0.370966	0.683028	0.591372
0.682669	0.523071	0.774514	0.216729	0.571959	0
0.553828	0.425135	0.781256	0.707816	0	0.146067
0.605768	0	0.579604	0	0.639257	0
0.524533	0.506857	0.539786	0.482312	0.45335	0.552953
0.650686	0	0.545062	0	0.615356	0.546597
0.578414	0	0.358474	0	0.651752	0
0.567764	0.48486	0.795166	0.618141	0.562377	0
0	0	0.651747	0.574237	0.621821	0.557184
0.551347	0.637598	0.64082	0.646898	0.43587	0.434536
0.068091	0.607165	0.834477	0	0.558438	0
0.611588	0	0.426805	0.348169	0.675412	0.37691
0.531544	0.483427	0.730328	0.426322	0	0
0	0.581844	0.634396	0.237115	0.658345	0
0.618207	0	0.555618	0.544491	0.583582	0.304412
0	0	0.608777	0	0	0
0.487847	0.328679	0	0.41469	0.59053	0.570047
0	0.361995	0	0.389091	0	0.148213
0	0.47529	0.697662	0.202922	0.474034	0
0	0.457952	0.749917	0	0.691081	0
0.632665	0.55104	0.565385	0.395614	0.519589	0.512517
0.605377	0	0.598891	0.447733	0	0.433724
0.641134	0	0.534777	0.337919	0.571573	0.299377
0	0.42053	0.661273	0.409345	0.631472	0.580287
0.612659	0.565624	0.689065	0.723766	0	0
0.68289	0.550225	0.645992	0.248948	0.664836	0.271328
0.422067	0	0.431756	0.111089	0.587889	0.406732
0.530984	0	0.633542	0	0.069012	0.624433
0.70283	0.527327	0.473824	0.516984	0	0
0.511015	0	0.529729	0.586951	0.406836	0
0.567842	0.444931	0.446675	0	0.579203	0
0.684736	0.446014	0.509528	0	0.645259	0.641719
0.439169	0.390206	0.642132	0.642765	0	0.24742
0.580686	0.353277	0.523743	0.484147	0.525776	0
0.494306	0.425072	0.598496	0.545532	0.506943	0
0.558209	0.517361	0.709962	0	0	0.460757
0.481703	0.535951	0.733627	0.593319	0.666949	0.448416
0.584408	0.607974	0	0.471616	0.728564	0.529613
0	0	0.824203	0	0.236535	0
0.306185	0.404322	0.66166	0	0.574453	0
0.564338	0	0.541439	0.162291	0.585053	0
0	0.455741	0.452276	0.833292	0.556637	0.472752
0.633624	0	0.24712	0	0.404209	0
0.5149	0	0.688192	0	0.715893	0
0	0.600016	0.752507	0.468404	0	0
0.43616	0.507394	0.741268	0.812885	0	0
0.444115	0	0.532177	0.710215	0.491582	0.401502
0.319376	0.584003	0.361429	0.257798	0.588243	0
0	0.474181	0	0.271494	0.417995	0.369724
0.547262	0.235238	0.738835	0.495174	0.622902	0.533368
0.573211	0.193576	0.663344	0.646045	0	0
0.525783	0.45122	0.412053	0.223394	0.538732	0
0.668865	0.585111	0.746036	0.454929	0.565029	0.450575
0.590086	0.565936	0.628639	0.410836	0.588927	0
0.607334	0.42946	0.62455	0.498296	0.665454	0.16385
0.697183	0	0.832438	0.534333	0.591251	0.437446
0.563982	0	0.588744	0	0.556731	0.517567
0.611462	0.30414	0.428285	0.221097	0	0
0.443806	0.55097	0.616096	0	0.517339	0.360455
0.59031	0.498732	0.303265	0	0.64751	0.334537
0.684284	0.59434	0.340597	0.137343	0.514309	0
0	0	0.65827	0	0.433508	0
0.653675	0.546833	0.472566	0	0.705966	0.124711
0.497018	0.511106	0.78838	0	0.611729	0.550306
0	0	0.46093	0.361623	0.628773	0.275077
0.684043	0.470148	0.61997	0	0.449123	0.621377
0	0.539598	0.404866	0	0	0.64575
0.398807	0	0.617548	0.342294	0.418034	0
0.631665	0.419257	0.387763	0.709426	0.669001	0
0.602927	0.428551	0.432044	0.784234	0	0.402097
0.649958	0.478369	0	0	0.671443	0.329934
0.64741	0	0.637653	0	0.625428	0
0	0	0	0	0.342959	0
0.682345	0	0.708891	0.607091	0.257446	0.371471
0.409603	0.43274	0.368868	0.428894	0.535821	0.508587
0.667819	0.601806	0.669328	0	0	0
0	0.603981	0.594485	0.427906	0.649498	0.29549
0.615033	0.531764	0.681948	0	0.336953	0
0.578274	0	0.647411	0	0.574986	0.286168
0.551413	0.336756	0.575309	0	0.147399	0
0.367132	0.546881	0.52091	0.586953	0.574174	0.373768
0	0.449459	0	0	0.626902	0
0.260226	0.404395	0.630431	0	0.711006	0
0.627569	0	0.569274	0	0.504597	0.537947
0	0	0.746733	0.210858	0	0.074768
0.718444	0.485898	0.748178	0	0.55242	0.457831
0	0	0.541302	0.536644	0.675814	0
0.637696	0.46453	0.656435	0.305146	0.436668	0
0.578373	0	0.565321	0.56388	0.3078	0
0	0	0.454163	0	0.825445	0.449931
0.440277	0.571289	0.680476	0	0.180589	0.547604
0.654534	0	0.63482	0	0.65681	0.63807
0	0.579545	0.745274	0.69262	0.592154	0.385524
0.57477	0	0.457607	0	0.522999	0.457229
0.591316	0.5356	0.708749	0.388047	0.483713	0
0.598855	0.409383	0.565365	0	0	0
0.530105	0.440638	0.758821	0	0.436705	0.556318
0	0	0	0.305059	0.655837	0.454791
0.595583	0	0.673983	0.090191	0.172187	0.233699
0	0	0.668978	0.531344	0.703011	0
0.492685	0.4989	0.728565	0.616686	0.525492	0
0.609319	0.525461	0.601579	0	0.609515	0.22932
0.619121	0.336978	0.706085	0.674593	0.370498	0.767225
0.527731	0.525404	0.552316	0.353932	0	0
0	0	0.484107	0.357868	0.611637	0
0.530375	0.345379	0.712971	0	0	0
0	0.192671	0.700042	0	0.794494	0.45791
0.54382	0.49217	0.436234	0.475802	0.591208	0
0	0.602312	0.29581	0.451403	0.732954	0
0.601021	0	0.683431	0	0.576898	0
0.673343	0.492324	0.363327	0.504136	0.559731	0
0.381619	0.593723	0.695021	0.287594	0.531225	0.409444
0.154976	0.471225	0.581741	0.662692	0.642628	0.721734
0.62767	0.38592	0.473702	0.612789	0.58251	0
0	0.501245	0.651885	0.708408	0	0.479415
0	0.632288	0.597907	0.113668	0.174624	0
0.476747	0	0.539246	0	0.498911	0
0.516513	0.582037	0.742289	0.319214	0.654539	0.282951
0	0.488395	0.741803	0.583378	0	0
0.577769	0.477178	0.326386	0.611387	0	0.242482
0.528184	0.297199	0.459954	0.21495	0	0
0	0.420106	0.69926	0.262481	0	0.612965
0.578748	0.524325	0.795358	0.499051	0	0
0.54122	0.295336	0.678939	0.559762	0.119372	0.228647
0.565441	0.269513	0.644406	0.807137	0	0.218365
0.613115	0.488634	0.566559	0.592605	0.599134	0
0	0	0.562691	0.430648	0.717931	0
0.635005	0.548446	0.858768	0	0.71905	0.505234
0	0	0.651146	0.691825	0.711247	0.59777
0.552826	0.637639	0.664004	0.547705	0.636175	0.573268
0.481536	0.505202	0.610601	0	0	0.302051
0.489812	0.497744	0.306212	0	0	0.55815
0.133921	0.413426	0.638055	0	0	0.533123
0	0.643906	0.602615	0.543055	0.628884	0.398537
0.496558	0.53448	0.655445	0	0.465393	0
0.492299	0	0	0.342427	0	0
0.588498	0	0	0.376227	0.446007	0.58242
0.610149	0.38522	0.651901	0.350801	0	0
0.459777	0	0.944397	0.43246	0.491757	0
0.431618	0.534387	0	0.283488	0.58305	0.497645
0.623407	0.531442	0.68573	0.345142	0.666029	0
0	0.451163	0.597854	0.643812	0.395835	0.583114
0.636011	0.495881	0.617715	0.636816	0.390842	0
0	0	0.706594	0.52337	0.583258	0.538512
0.581554	0	0.655839	0.658685	0.582019	0
0.365881	0	0.577091	0	0.692526	0.601594
0.550878	0	0.700335	0	0.535519	0.478987
0.533734	0.69007	0.687113	0	0.6149	0
0.607319	0	0.350955	0.329307	0	0.394544
0	0.370809	0.631896	0.427902	0.451181	0.41957
0.549171	0.519641	0.737119	0	0.628047	0
0.544231	0.646939	0.449026	0.625036	0.578673	0.440988
0.522657	0	0.735068	0.162895	0	0
0.612541	0.460981	0.528722	0.335782	0.656459	0.574782
0.621837	0	0.506936	0	0	0.325659
0	0.577258	0.343748	0	0.668267	0
0.620405	0.654551	0.723109	0.474513	0.214704	0
0	0.431886	0.679482	0.329636	0.494768	0
0.611358	0.54475	0	0	0.632549	0.285498
0	0	0.622472	0.473454	0	0
0	0.635913	0.840092	0	0.594623	0
0.64482	0.486604	0.642336	0.594147	0.530398	0
0	0.449718	0.694776	0.34971	0.590289	0
0.408839	0.460409	0.449793	0	0.619728	0.240389
0.624035	0	0.374296	0.569831	0	0.132093
0.569407	0	0.589116	0.29623	0.589997	0
0.478394	0	0.398067	0	0.453335	0
0.489621	0.472048	0.619171	0	0.608004	0
0.554928	0.457152	0.615288	0	0	0
0.715447	0	0.535756	0.397102	0.517224	0.493006
0.262556	0	0.450032	0.299154	0.521692	0.245372
0.650825	0	0.460728	0.218274	0.491338	0.50674
0.437043	0	0.678545	0.304848	0	0
0.506207	0.520706	0.566503	0.153126	0.692814	0.353735
0.539528	0	0.803139	0.555551	0.73603	0
0.590377	0.448971	0	0.638289	0.605668	0.203653
0.584396	0.132307	0.646293	0.302328	0.630124	0
0.587343	0	0.632328	0	0	0.527969
0	0.441957	0.683648	0.600186	0.649659	0.373018
0	0	0.17693	0	0.616824	0
0	0	0.691081	0	0	0.293136
0.514351	0.392569	0.594771	0.624962	0.576964	0
0.481771	0	0.801193	0.539295	0.496054	0.451821
0	0.292223	0.477653	0.140051	0.609772	0
0.575668	0.517139	0.124058	0.408199	0.546908	0
0	0	0.768987	0.225549	0.660194	0
0.686678	0	0.565804	0.453681	0.418794	0.413707
0.469562	0.392751	0.7767	0	0.593837	0
0	0.442579	0.259156	0.628065	0.238306	0.493979
0	0.612436	0.585516	0	0.407227	0.284957
0.550033	0.4719	0.634699	0	0.659218	0.465565
0.515532	0.318199	0.352197	0	0.408689	0
0.647939	0.417473	0.649091	0.409982	0.455509	0.653649
0	0	0.699079	0	0.54321	0
0	0.529451	0.644302	0.248605	0	0
0.63926	0	0.656094	0.446815	0.729086	0.576904
0.568777	0.460428	0.283026	0.391439	0	0.32729
0	0	0.512282	0	0.402785	0
0.153637	0.510645	0.666949	0	0.653271	0.248262
0.581219	0.453036	0.866137	0.527571	0.545506	0
0.553008	0	0.380758	0.545631	0.605358	0.559185
0.450832	0	0.68968	0	0.648161	0.439276
0.597891	0.641319	0.514174	0.526238	0.470396	0
0	0.514994	0	0.756878	0.721729	0
0.644582	0.559355	0.664788	0.704655	0	0
0.603739	0	0.426087	0.563304	0	0.566241
0.632272	0.60934	0.760446	0.562622	0.410568	0.404762
0.592204	0	0.816922	0.703464	0	0
0.662924	0.522933	0.500859	0.361346	0.583278	0.442979
0.489716	0	0.756588	0.821112	0.652071	0.481113
0.699517	0	0.625624	0	0.522172	0.264481
0	0.357743	0.371824	0	0.408779	0.521257
0.390365	0	0.37698	0.594639	0.599753	0
0.684287	0	0.382582	0.400374	0.738672	0
0.565141	0.367605	0.628687	0.501611	0.478052	0
0.65751	0.495546	0.596142	0.87732	0	0.304248
0.521351	0.300246	0.691581	0	0	0.453796
0.557647	0.683032	0.692221	0	0.602032	0.254663
0.528824	0.588982	0.632824	0.713935	0.613035	0
0.610377	0.580735	0.535561	0.700412	0	0
0	0.257101	0.198471	0.188483	0.335459	0
0.579735	0.303869	0.490335	0.193439	0.286866	0
0.442915	0.635212	0.692895	0	0.52509	0
0.666528	0	0.577971	0	0.468625	0
0.620735	0	0.603179	0.608002	0.430102	0.357922
0.546034	0.197535	0.506849	0	0.320727	0.483307
0.645125	0.243701	0.732292	0.406779	0	0
0.49764	0.511944	0.492958	0.590098	0	0
0.604289	0	0.390287	0.473952	0.389959	0.5297
0	0.571305	0.776542	0.780499	0.529795	0
0.545415	0.368013	0.50666	0	0.429026	0
0	0.524993	0.669574	0.483456	0	0
0.669723	0	0.514309	0.383312	0.894381	0.585951
0.396218	0	0.803376	0	0	0.437179
0	0.542574	0.52596	0	0.738759	0
0	0	0.645653	0.438722	0.686292	0
0.179974	0.450675	0.692946	0.720612	0.530764	0.626266
0	0.220382	0.577283	0.159082	0.537213	0.436332
0.566665	0	0.471736	0.436632	0.492785	0
0.577526	0.505073	0.642074	0	0	0.408801
0.578167	0	0.58181	0	0.681485	0
0.565208	0	0.597719	0.632677	0.568119	0.581586
0	0	0.679855	0.236943	0.660166	0.552584
0	0	0.619548	0.410614	0.686805	0
0.589733	0.362657	0	0.380941	0	0.54695
0	0	0.587154	0.599913	0.427515	0.338581
0.631897	0.423575	0.647197	0	0	0.515916
0.520401	0.619844	0.695602	0.815711	0.470759	0.261353
0.589134	0.665282	0.747373	0.570827	0.588524	0.567007
0	0.238082	0.711732	0	0.580543	0
0.548423	0	0	0.617314	0.653815	0
0.583661	0.470877	0.71122	0.445198	0.525082	0.646898
0	0.245918	0.473959	0.60214	0.439384	0.598794
0.675544	0	0.785831	0	0.569021	0.237115
0.551353	0.442562	0.662801	0	0.636926	0.362447
0.587889	0	0.653726	0	0.458112	0.223825
0.634737	0.550322	0.497159	0.612052	0.472734	0
0.618477	0.510153	0.803345	0.474707	0.478158	0
0.592612	0.469629	0.489031	0.295008	0	0.530575
0.547237	0.513339	0.582927	0	0.291226	0.311395
0.566837	0	0.574174	0.403447	0.441388	0
0.579203	0.625074	0.670044	0.373321	0.653977	0.337919
0.563779	0.687768	0.688053	0	0.72054	0.597367
0.522919	0.281549	0.656429	0.596584	0.61902	0.18806
0	0.527319	0.258322	0	0.603747	0
0.576887	0.451162	0.690664	0.532345	0	0
0.57151	0	0.610739	0	0	0.517998
0.522528	0.493251	0.743926	0.344925	0.64003	0.607832
0.557977	0.399185	1.09684	0	0.722621	0
0.610416	0.299196	0.61998	0.481638	0.299673	0.471899
0.436723	0	0.436668	0	0.702035	0.563792
0	0.461817	0.543683	0	0.53982	0.368331
0.634099	0.548746	0.542739	0.349623	0.704387	0.706645
0.629807	0.285894	0.573818	0.413815	0.628974	0.209393
0.558929	0.477695	0	0	0.272629	0
0.463993	0.505418	0.890112	0.294888	0.706574	0.578093
0.612975	0	0.679886	0.603638	0.370623	0
0.60856	0	0.580759	0.503665	0.542346	0
0.638659	0.353009	0.638125	0	0.465026	0.152139
0	0	0.318582	0.46846	0.471509	0.730518
0	0.551363	0.699411	0	0.589928	0.455185
0.544071	0.497525	0.682588	0	0.537079	0
0.564445	0.531943	0.511687	0.086726	0	0
0.260215	0.554643	0.669261	0.926607	0.376827	0
0.563107	0	0.745903	0	0.627164	0
0	0	0.550414	0.439494	0.518258	0
0.489554	0.464652	0.532472	0.678493	0.688074	0
0.715893	0	0.525492	0	0.431516	0.571297
0.617257	0.524137	0.611637	0	0.396215	0.195196
0.585138	0	0.438161	0.520468	0	0
0.551871	0.501416	0	0	0	0.497959
0.607153	0.435764	0.732954	0.271779	0.439911	0
0	0	0.68163	0.553266	0.49051	0
0	0.317061	0.741089	0.480416	0	0.451242
0	0	0.700883	0	0.495086	0
0.570454	0	0.46297	0	0.6575	0
0.601072	0	0.658958	0.405702	0.561159	0
0.627704	0	0.607074	0.47736	0	0
0.519471	0.31125	0.757787	0.536983	0	0.189477
0.70591	0.410534	0.719039	0.227018	0.450316	0
0.579393	0	0	0	0.606862	0.122767
0.647462	0	0.66365	0.67057	0.509464	0.491304
0.556285	0.595439	0.60921	0.377861	0.572109	0.685497
0.570626	0	0.306785	0.664378	0.604721	0.23537
0.583983	0.598499	0.646371	0	0.51683	0
0.502	0	0.637325	0.621294	0.551461	0
0.530306	0	0.419889	0.713161	0.001932	0
0.44363	0	0.658627	0.406881	0.682709	0
0.521093	0	0.307994	0	0	0
0.519847	0	0.650073	0.417376	0.491744	0
0.368515	0.528948	0.572307	0.668899	0	0
0.627464	0.453523	0.556607	0.662114	0.620015	0.616677
0.566315	0.404056	0.641636	0	0	0
0.620998	0.346862	0.5858	0.777278	0.612367	0.551748
0.699829	0	0.656733	0.571904	0	0
0.503651	0.593715	0.681102	0.742915	0.605561	0.287234
0	0	0.621731	0.543053	0.528972	0
0.550216	0.341926	0.711247	0.583935	0.60903	0
0.484235	0	0.252246	0.659711	0	0.565888
0	0.504885	0.643162	0.533175	0.615706	0.449988
0.631475	0	0.740352	0.484623	0.707597	0.166201
0.463786	0	0.527235	0	0.417862	0
0.618455	0	0.490271	0	0	0.347129
0	0	0.660276	0	0	0.604284
0	0.616752	0.590653	0	0.680161	0
0.512638	0	0.665197	0	0	0.520578
0.53475	0.313764	0.737288	0	0.443939	0.327147
0	0.13673	0.449106	0.577942	0	0.321871
0	0.491213	0.749948	0.562483	0.571893	0.642055
0.557094	0.454101	0.640953	0.543823	0.350382	0
0.55975	0	0.601282	0.486311	0.568437	0
0	0	0.756495	0.480584	0.415784	0
0.572694	0.515295	0.613223	0	0	0
0.472077	0.60819	0.441477	0	0.508123	0
0.63553	0	0.556481	0.787302	0.588555	0.164083
0.565132	0.535585	0.825992	0.726481	0.527424	0
0.541538	0	0.566877	0.657568	0.591285	0.320681
0	0.164019	0.615701	0	0.699571	0.597839
0.65671	0.239478	0.629359	0.567373	0.657706	0.572657
0.539294	0	0	0	0	0.583862
0.536996	0	0.771805	0.368982	0.367379	0.633905
0.537455	0.532612	0.849577	0.654082	0.446861	0.315627
0	0	0.715495	0	0.751587	0
0	0.426622	0.569598	0	0.599234	0.559544
0.526137	0	0.62935	0	0.485515	0.546684
0.391631	0.412056	0.567098	0.30624	0	0
0.614981	0.403901	0.642455	0.7034	0.280313	0
0.590193	0.48882	0.807681	0.19341	0	0.46185
0	0.393615	0	0	0.466059	0
0	0.710912	0.610593	0.231872	0.368654	0.598548
0.4601	0	0.607941	0.468177	0.554882	0
0.618859	0	0.66436	0.685077	0.662376	0.272747
0.595652	0	0.714631	0	0.51424	0.258478
0.601481	0	0	0.681634	0.627696	0.484812
0.582315	0.520243	0.526967	0.846176	0.644972	0.62835
0.614584	0	0.61642	0.603499	0.525711	0.519966
0.550435	0.329242	0.702211	0.136623	0.346712	0.309289
0.630051	0.542839	0.446619	0.477432	0.246936	0.274598
0.474762	0.522714	0	0.189686	0	0
0	0.358716	0.401762	0.560029	0	0.442833
0.620993	0.189042	0.591364	0.511501	0.413045	0
0.448747	0.381934	0.640688	0.633495		0
0.551921	0.575373	0.760938	0.593433		0
0.506031	0.584775	0.722869	0.708769		0
0.572896	0	0.395001	0.346287		0.353932
0.53719	0	0.446902	0		0.510482
0	0.484492	0	0.295949		0
0.582398	0.362636	0.687653	0.281985		0
0.590736	0	0.680238	0.191328		0.317708
0.553259	0.575145	0.68066	0		0.111417
0.370498	0	0.680605	0.455226		0
0.553018	0.512683	0.325715	0		0.317111
0.61103	0.525438	0.739262	0.443554		0.382361
0.492654	0.553499	0.407034	0.58719		0
0.613377	0.639537	0.594623	0.659127		0.466889
0.627576	0	0.495456	0		0.223374
0.642563	0	0.49187	0		0.224538
0.618331	0	0.746268	0.361594		0.108426
0.591208	0.125196	1.01315	0.458739		0.412455
0.624263	0.609028	0.666824	0		0.328275
0.58205	0.590227	0.848674	0		0
0.543635	0.484689	0.4882	0.559802		0.541538
0	0	0.814625	0		0
0.637105	0	0.587657	0.669837		0.471186
0.481553	0	0.857118	0.146018		0
0.499231	0.20762	0.442432	0		0.504806
0	0.456	0.700327	0		0.608718
0.568715	0.385589	0.582309	0		0.382751
0.457567	0	0	0		0
0	0	0.672435	0.346917		0.617563
0	0.251449	0.6034	0.725411		0.374831
0	0.572359	0.642165	0.299065		0
0.60512	0.362851	0.562121	0		0.453341
0.52252	0	0.518594	0.551747		0
0.587616	0.541974	0.446705	0		0
0.608858	0	0	0.855761		0
0.548148	0	0.747563	0		0.217197
0.606759	0	0.485733	0.51766		0.515648
0.514536	0.711056	0.636073	0.266711		0.45022
0.342484	0.527519	0.727297	0.536647		0.282805
0.557831	0	0.574372	0		0.499051
0	0.527204	0.633316	0		0
0.498911	0	0.304345	0.46109		0
0	0.546553	0.587667	0.344634		0.502273
0.701405	0	0.648161	0		0
0	0	0.720613	0		0.592605
0.145422	0.467612	0.794764	0		0
0.544431	0	0.70941	0.283225		0.572443
0.57924	0.516223	0.553178	0		0.369137
0.706163	0.376736	0.652071	0		0
0.514458	0	0.720218	0		0
0	0.608154	0.482997	0		0
0	0.60565	0.646051	0.17918		0
0.567107	0.447541	0.658056	0.655399		0
0.607245	0.59841	0.701127	0.51554		0.4
0.655188	0.488919	0.627806	0		0
0	0.468858	0.723109	0.547354		0.665163
0	0	0.830371	0		0
0.570311	0	0.449583	0.691923		0.403838
0.60934	0	0.42018	0		0.382351
0	0	0.707939	0.697928		0.588228
0.529573	0.476147	0.375087	0.100027		0.342427
0	0.524099	0.582243	0.248445		0.120729
0	0.517951	0.722013	0.519273		0.271883
0.496315	0.567582	0.659831	0		0.478621
0.46842	0.607074	0.750275	0.497336		0.242209
0.618986	0.54644	0.450053	0		0.132913
0.527257	0	0.546196	0		0.534708
0.62224	0.574856	0.80933	0		0.690672
0.559284	0.22648	0.660166	0.651063		0.168198
0.591652	0.45013	0.311679	0		0.355897
0.485983	0.542134	0.702148	0		0.488094
0.513601	0.293983	0.593398	0		0
0	0	0.566503	0		0.281989
0.519454	0	0.65159	0.45917		0
0.508385	0.484602	0.653815	0		0.572736
0.524343	0	0.643945	0.543304		0.489494
0.561004	0.463876	0.587405	0.715315		0
0.53062	0.523082	0.5285	0		0.392935
0	0.528541	0.708621	0.531975		0.626866
0	0.452927	0.635915	0.547708		0.542548
0.566577	0.4306	0.63138	0.616925		0
0.456037	0.351511	0.735893	0		0
0.579994	0.392003	0.327624	0		0.153292
0	0	0.100429	0.289111		0
0	0	0.385565	0.533749		0
0.566681	0.646957	0.692006	0.245803		0.313749
0.631668	0.569469	0.405553	0.633892		0.240651
0.704006	0.502252	0.652331	0		0
0	0.628443	0.553078	0.516162		0.295143
0.7069	0.400471	0	0.160493		0.460769
0.681097	0	0.707742	0.429943		0.418059
0.150118	0.308575	0.722286	0.659061		0.496247
0	0.413985	0.649111	0.571529		0.263885
0.593283	0.519329	0.709949	0		0.595194
0	0.194641	0.745825	0		0
0	0.268504	0.722621	0.416332		0
0.549498	0	0.539914	0		0.393148
0	0.309099	0.704387	0.371792		0.562345
0.597269	0	0.628974	0.455566		0
0.624362	0.458492	0.706574	0.331037		0
0.53662	0.376469	0.663624	0.456605		0.499948
0	0	0.471509	0		0.423209
0	0.554573	0.685475	0		0
0.534089	0	0.401227	0.459124		0.545073
0.626231	0.44277	0.424935	0.590124		0
0.694805	0.493912	0.612393	0.527937		0.540189
0.185855	0	0	0.606971		0
0.654961	0.518303	0.392501	0		0.068522
0	0.50514	0.201559	0		0.293479
0.16879	0.20333	0.632851	0.331793		0
0	0.533123	0.701088	0		0
0.514305	0.344753	0.193396	0.120088		0
0	0.55716	0.749237	0		0
0.541736	0.620043	0.417749	0		0.523627
0.58823	0.610896	0.419769	0.409727		0.311074
0.421701	0	0.709523	0.257668		0
0.504032	0	0.61421	0		0
0.22918	0	0.703109	0.682035		0
0	0	0.598713	0		0.341285
0.630529	0.47364	0.386148	0.710309		0.390227
0.541038	0	0.6575	0		0
0	0.569955	0.655494	0.747058		0.280655
0.640303	0.161621	0.728174	0.567845		0.445492
0	0.485044	0.439175	0		0
0.539557	0.516376	0.621693	0.599359		0.486989
0.461462	0.594394	0.736869	0.426935		0
0.546197	0	0.633735	0		0
0.598866	0.696342	0.602287	0		0.428551
0	0.482747	0.417766	0.212704		0
0.663869	0.447796	0.421476	0		0.584564
0.471474	0.619441	0.727175	0.171959		0
0.582639	0.395317	0.769444	0.649009		0
0.345128	0.569695	0.666559	0.33341		0.511615
0.582213	0.546622	0.554877	0		0
0.308475	0	0.348632	0		0
0.597269	0.492296	0.600973	0.52899		0.583315
0.244555	0.577501	0.570506	0		0.606964
0.496054	0.531321	0.564659	0.529505		0.542045
0.609772	0.449604	0.791687	0		0.298555
0.518873	0.516109	0.668324	0		0.504694
0.579715	0	0.580078	0.649516		0.131911
0.569421	0.434279	0.799418	0.288344		0.238674
0.585693	0	0.534437	0.68641		0
0.60104	0.556185	0.540143	0.475756		0
0.49272	0.411327	0.491744	0.686802		0
0.60551	0.30415	0.691109	0		0.231645
0.519029	0	0.476104	0		0.50221
0.122764	0.380235	0.630089	0.257235		0
0.624114	0.547799	0.762418	0.431778		0
0	0.5283	0.401872	0		0
0.234147	0.327301	0.692613	0		0.414343
0.371186	0.664654	0.357326	0.59208		0
0.599462	0	0.656981	0.280868		0
0.615238	0.482301	0.421315	0		0
0	0.40994	0.742585	0		0
0.57156	0	0.422362	0.737054		0.332671
0.423567	0.486146	0.640746	0		0.400567
0	0.370298	0.417862	0.473503		0
0	0	0.619511	0		0.162059
0	0.328749	0.633284	0.717444		0.427586
0	0	0.690656	0.251373		0.590098
0.625298	0.574375	0	0		0
0.617738	0	0	0.348546		0.483182
0.284471	0.617831	0.782216	0.445412		0.471276
0.525086	0	0.372236	0		0.582757
0.462947	0	0.596019	0.727197		0
0.660876	0.248107	0.690552	0.682096		0.661077
0.138333	0.517242	0.512623	0.500618		0.586031
0	0.390707	0	0.176223		0.383312
0.646198	0.513971	0.238053	0		0.567824
0.676921	0.554301	0.573088	0		0.438722
0.479829	0	0.479702	0.639249		0
0	0.344637	0.61151	0.613433		0
0.461051	0	0.411755	0.46563		0
0.429107	0	0.401368	0.66678		0.320973
0.560992	0	0.701007	0.52336		0
0.511349	0	0.441727	0.549214		0.493356
0.364413	0.276997	0.529129	0.258359		0
0	0	0.588617	0.265189		0.527674
0.582387	0.527923	0.596237	0.799156		0
0.57924	0.512335	0.768711	0.468324		0.543969
0	0.602589	0.427285	0		0
0.581202	0.465433	0.541356	0.328158		0
0	0	0.718759	0		0.453381
0.567661	0.548147	0.60053	0		0.382476
0.54141	0.524497	0.59081	0.384115		0
0.761599	0	0.699082	0.227263		0
0.708951	0.429276	0.427476	0		0
0.474165	0	0.520013	0.337189		0.553108
0	0.365546	0	0		0.348474
0.573005	0.575149	0.540248	0.490727		0
0.602032	0	0.621951	0.33608		0.545126
0.534203	0	0.734865	0.473892		0
0.600647	0	0.575312	0		0
0.245595	0	0.711226	0.474881		0
0.641277	0.616053	0.711881	0		0.202941
0.572806	0	0	0.553018		0
0.541224	0.471918	0.525858	0.493647		0.550176
0.494494	0.47403	0.438923	0.529871		0
0	0	0.413045	0		0
0.545367	0.381055		0.599236		0
0.565666	0		0		0
0.504097	0.311104		0.567767		0.090535
0.761851	0.377643		0.347699		0.526176
0.582658	0.463587		0		0.316006
0	0.586902		0.623449		0
0.577811	0.47836		0.441223		0
0.596374	0.559861		0.346351		0.63536
0.533157	0.606914		0.517032		0.389175
0.562933	0		0.688952		0
0.634005	0		0		0
0.594152	0		0		0.119203
0.578355	0.446528		0.380274		0
0.691754	0.577374		0.645713		0.5202
0.25165	0.443981		0.494475		0.44618
0.595144	0.304302		0		0.559641
0.530574	0.552904		0		0.325666
0	0		0.692777		0.366982
0.577034	0.542039		0.424648		0.41427
0	0.439276		0.339827		0.709734
0	0		0.460602		0
0.631881	0.547214		0		0.291846
0.65425	0.375576		0.736263		0.347462
0.470064	0.537472		0.388462		0.623429
0.633279	0		0.598266		0.400199
0.531017	0		0		0.519856
0.527738	0.410096		0.567447		0.413815
0.54698	0.553409		0.251925		0.204973
0.534244	0.603229		0.229963		0.455862
0.492852	0.530173		0.52092		0.415102
0.576068	0.572251		0.222076		0
0.210311	0		0.577113		0
0	0		0.321513		0
0.565066	0.65086		0		0
0.637006	0.269414		0		0.577773
0	0.496781		0.5808		0.362249
0.545254	0.180882		0.135454		0.604772
0	0		0		0.448209
0.391507	0		0		0.398256
0.578899	0		0.533596		0
0.661078	0.268342		0.47115		0.462131
0.669783	0.565469		0.520961		0
0	0.43368		0		0
0.584773	0.526994		0.605149		0.273058
0	0.479739		0.626093		0
0.568603	0.50644		0.484316		0
0.668799	0.271643		0.775777		0
0.494587	0.468738		0		0
0	0.505451		0.479262		0.246206
0.539914	0.451624		0.530986		0.328867
0.619436	0.555421		0.639776		0.335243
0.659432	0		0		0
0.614863	0.529512		0.488985		0.1485
0.541586	0.381911		0.61609		0.481958
0.416115	0.392854		0		0
0.53393	0		0.660624		0.21709
0	0.51258		0		0.265184
0.426841	0.548871		0.479063		0.14651
0	0.377761		0.610499		0.341736
0.472853	0.418936		0		0.321493
0.540779	0.577391		0.478874		0
0	0.281164		0.565699		0.466648
0.438615	0.486374		0		0.313015
0.434737	0.487024		0.36127		0.227018
0.635032	0.52691		0		0
0.271424	0.472683		0		0.438287
0.468312	0		0.549811		0
0.578822	0		0.729631		0.630259
0	0.449605		0.492072		0.507215
0.52464	0.537163		0		0
0	0.50938		0.688643		0
0	0		0.403385		0.556133
0.561791	0		0		0
0	0.384423		0.963525		0.59015
0.534212	0.257235		0.255856		0.417376
0	0.611924		0.595153		0
0.740098	0.535365		0.517836		0
0.612208	0.519905		0.373393		0.306878
0.585105	0.598324		0.553885		0.355732
0	0.373673		0		0
0.683356	0.558149		0		0
0	0.422458		0.488267		0
0.624982	0		0.694273		0
0	0		0.484278		0
0.589934	0		0.488337		0.494814
0	0		0.656939		0
0.603667	0.511398		0		0.543053
0.710051	0		0.452295		0.516141
0.558825	0.294911		0.530459		0.4865
0.389638	0		0.186447		0.125681
0.590632	0		0.540607		0
0	0		0.642288		0.659711
0.720307	0.552202		0.160699		0
0.612372	0		0		0
0.424249	0.574866		0.634337		0.533175
0.522782	0.507341		0		0.380398
0.668223	0.514853		0.250664		0.40125
0	0		0		0.301811
0.619949	0		0		0
0	0		0.606892		0
0.565669	0.558198		0.373718		0
0	0.394086		0.59613		0
0.604202	0.579393		0		0.433178
0.609673	0.207753		0.190452		0
0	0		0.490267		0.416709
0	0.516445		0		0
0.541161	0		0		0
0.563622	0.127351		0.403662		0
0.521244	0.541105		0		0.236189
0.666865	0.26671		0		0.371022
0.602211	0.492072		0.637937		0
0.552935	0.517241		0.643464		0.211283
0	0.56163		0.533402		0.31813
0.6527	0.410643		0.292514		0
0.709627	0.454423		0.277923		0.543509
0.562591	0.428583		0.368717		0.574691
0.683014	0		0.644463		0
0	0		0.66238		0
0.285357	0.391577		0		0.350815
0.582915	0		0		0.468707
0.575586	0.631628		0.674152		0.35534
0.526438	0		0.699737		0
0.568047	0		0.297897		0
0	0		0.405469		0
0.552348	0		0		0
0.211946	0.515502		0		0
0	0.425464		0.401468		0.541521
0.525583	0.131862		0		0
0.577053	0		0		0
0	0		0		0
0.466027	0		0.630657		0
0	0.584628		0.389476		0.549235
0.314166	0		0.270437		0.403775
0	0.42573		0		0.048316
0.450701	0		0.516569		0
0.613469	0.510441		0.285885		0.558378
0.681062	0.536171		0		0.457337
0.478637	0		0		0
0.343596	0.391825		0		0.3838
0	0.504778		0		0.431715
0.605989	0		0.634522		0
0.603431	0.461324		0		0
0.690825	0		0.608222		0
0.515016	0.447554		0		0
0	0.496854		0.659525		0
0.670449	0		0.698919		0
0.412483	0.445214		0		0.465736
0.560269	0.371367		0.417826		0.231872
0.600091	0.364739		0		0.073806
0	0.507016		0		0.558267
0.650474	0.522409		0.250594		0.503319
0.57138	0.540441		0.379509		0.321936
0.209036	0		0.377202		0.610603
0.563051	0.467776		0		0
0.551646	0		0.635834		0.628737
0.188522	0		0.573218		0.6632
0	0.462836		0.651652		0.245057
0.511496	0		0		0.598247
0.584034	0.452769		0		0
0.614861	0		0.304499		0.515408
0.627696	0.455364		0		0
0.609017	0		0		0
0	0.472955		0.369185		0.593668
0.739592	0.10032		0.431986		0.355896
0	0		0.371271		0
0.346712	0.363472		0.165026		0.162171
0.613342	0.559874		0.565813		0
0.571425	0.19929		0		0
0	0.544322		0.548176		0
0.629829	0.616575		0.412284		0.52005
	0.368314		0		0
	0.519502		0.696996		0.689101
	0		0		0.264294
	0		0		0.46274
	0.577388		0.493501		0.38448
	0.23715		0		0
	0.525271		0		0
	0		0.290931		0.32751
	0		0		0
	0		0		0
	0.415603		0.588015		0.56162
	0.421226		0.563318		0.586548
	0.313849		0.384126		0
	0.589346		0		0
	0		0.468556		0
	0.121683		0.568721		0.256661
	0.325749		0.375922		0.32711
	0.431717		0.761542		0.19502
	0.275763		0		0
	0.368285		0.29849		0.217122
	0.536797		0.594952		0.581289
	0		0.554721		0.517585
	0.491105		0.618659		0
	0.48901		0.668606		0.527747
	0.442183		0		0.318384
	0.452501		0.359448		0
	0.531127		0		0
	0.546915		0.494935		0.285525
	0.380847		0.205557		0
	0.199138		0.678519		0.093163
	0		0.866015		0.620977
	0		0		0
	0.511503		0.354562		0
	0.503767		0.340471		0.251071
	0		0.703509		0
	0.534587		0.633309		0
	0		0.233449		0
	0.44289		0.289901		0.537337
	0.450618		0		0.851968
	0.545144		0		0.571416
	0.478309		0.520794		0.35968
	0.51391		0.258263		0.572676
	0		0.65511		0.401555
	0.538836		0.638215		0.541341
	0		0.522088		0.157355
	0.234862		0.25316		0.458336
	0		0.478587		0
	0.5982		0		0.562725
	0.638944		0.51141		0.580348
	0.609175		0.23141		0
	0.375805		0.396977		0
	0.626134		0		0
	0.538334		0.446343		0
	0.575393		0.401433		0
	0.500123		0.343741		0.291535
	0.469874		0.315531		0.127553
	0.170786		0.509979		0
	0		0		0
	0		0.459318		0.223125
	0		0.379313		0
	0		0.632832		0.14935
	0.290715		0.626297		0
	0.667221		0		0.503156
	0.526158		0		0.402745
	0		0		0.253731
	0		0.518007		0.07281
	0.261612		0		0
	0		0.395241		0
	0.397323		0		0
	0.498639		0.517647		0
	0.321871		0.625337		0.629089
	0.27062		0.512754		0
	0.559028		0		0.161472
	0		0.470419		0.454204
	0.506934		0.411991		0.456114
	0.748197		0		0.327969
	0		0.549539		0
	0		0		0
	0.426213		0.344573		0
	0.276729		0.711057		0
	0.328984		0		0.193048
	0.441795		0.431192		0.46815
	0.497908		0.570539		0.072959
	0.559544		0.191023		0
	0.567356		0.319281		0
	0.595414		0.53427		0
	0.308151		0		0.449841
	0.282308		0.552382		0.575702
	0.524792		0.586011		0
	0.465263		0		0
	0		0		0.134725
	0.482773		0.546741		0.477291
	0		0.655935		0.440651
	0		0.407785		0
	0.593397		0.409738		0.342187
	0.667093		0		0.601057
	0.629579		0.376447		0
	0.42293		0.063447		0
	0.489623		0		0.584506
	0.425689		0.609396		0
	0		0		0.327346
	0		0.202237		0
	0		0		0.622625
	0.382242		0		0.299448
	0.640795		0.257955		0
	0.527444		0.615622		0
	0		0		0.554148
	0		0.332543		0
	0		0		0.589284
	0.474793		0.463864		0.45917
	0.511296		0.624311		0
	0		0.742774		0
	0.431596		0.55766		0.074196
	0		0.499825		0.498668
	0.400039		0.689015		0
	0.531785		0.504714		0.536233
	0.385108		0.397641		0
	0.504978		0.308103		0
	0.518106		0		0
	0		0.644553		0
	0		0		0.296311
	0		0		0.571724
	0.510203		0		0.609997
	0		0		0.502091
	0		0.61874		0
	0.450178		0		0.471618
	0		0		0.441036
	0		0.595539		0.445737
	0.535443		0.45339		0.110724
	0.333536		0.28236		0.514144
	0.290441		0.207727		0
	0.127102		0		0
	0.249805		0		0
	0		0.25943		0
	0		0.748357		0.592596
	0		0.635324		0.633892
	0.425812		0.580809		0.720671
	0		0.408948		0
	0		0		0
	0.559233		0		0.463918
	0.27588		0		0
	0.569376		0.496578		0
	0		0.27935		0.433881
	0.461885		0		0
	0.55865		0.232542		0.282187
	0.595814		0		0
	0.360708		0		0.538873
	0		0.5198		0
	0.124461		0.635607		0
	0		0.372289		0
	0		0		0
	0.581407		0.440438		0.376123
	0		0		0
	0.484696		0.256066		0.332647
	0		0		0
	0.376391		0		0
	0		0.453647		0.448965
	0		0		0
	0.561385		0.42895		0
	0.544203		0.457873		0.379988
	0.067943		0.556365		0
	0.169898		0.425214		0.706911
	0.386896		0.623987		0.599414
	0		0.607892		0
	0.560062		0		0
	0		0		0
	0.584889		0		0.616491
	0				0
	0.35821				0.63933
	0				0
	0				0.302289
	0				0.299863
	0.525252				0.527937
	0				0
	0.588228				0.619998
	0.187152				0.503894
	0				0
	0.288039				0.335454
	0.464295				0
	0				0.415343
	0				0.577327
	0				0.331793
	0				0
	0.399561				0
	0.51864				0
	0				0.532332
	0.265693				0
	0.582042				0
	0				0
	0.544921				0
	0.455331				0
	0.488094				0
	0.37303				0
	0.565005				0.112809
	0				0
	0				0
	0.485591				0.435444
	0				0
	0				0
	0.476399				0
	0				0.610369
	0				0
	0.408552				0
	0.50898				0.56534
	0.48165				0.49436
	0				0
	0.415043				0
	0				0
	0.18616				0.543062
	0.392417				0.651829
	0.554565				0.590014
	0.536657				0
	0.382924				0
	0.501192				0.508699
	0				0
	0				0
	0				0
	0				0.604063
	0				0
	0.395077				0.458967
	0.10007				0.565388
	0.292025				0
	0.569584				0.553576
	0.603268				0.341089
	0.457777				0
	0				0
	0.427088				0
	0.524745				0.720711
	0				0.683311
	0				0.510902
	0.342391				0.64575
	0				0
	0				0
	0				0.521072
	0				0
	0.558251				0
	0.533893				0.425377
	0.424651				0.446241
	0.59697				0.513037
	0				0
	0.192257				0.288184
	0				0.532531
	0.568046				0.449648
	0.596568				0.228166
	0.54408				0
	0.417858				0
	0.621287				0
	0.453943				0
	0				0.235545
	0				0.539388
	0.493362				0
	0.744739				0
	0.599597				0.556689
	0.276479				0.519392
	0				0
	0.568214				0.382257
	0.400033				0.121611
	0				0
	0.396923				0.363472
	0.389888				0
	0.445101				0.473503
	0.076541				0.147571
	0				0.440344
	0				0.261549
	0.550099				0
	0				0
	0.175473				0
	0				0
	0				0.392684
	0.223209				0
	0				0.484035
	0.561649				0
	0.527563				0.431221
	0				0
	0.363342				0.561851
	0.343691				0.449625
	0				0
	0				0
	0				0
	0.650069				0
	0				0
	0.439951				0.456537
	0				0.184424
	0				0
	0.522216				0.514093
	0.371247				0.229009
	0.41056				0
	0.660446				0.383473
	0.482274				0
	0.438429				0
	0.512094				0.328158
	0.446889				0.49838
	0.494602				0.383106
	0				0.53206
	0.541499				0.371004
	0				0.284113
	0.503345				0.266013
	0.5665				0.439911
	0.429907				0.313293
	0.490075				0
	0.598036				0.557891
	0.480342				0.495864
	0				0
	0				0.363648
	0.59018				0.568227
	0				0
	0.369317				0.414659
	0				0.265718
	0.439387				0.2769
	0				0.272382
	0				0.589686
	0				0.658347
	0.201703				0
	0.564894				0
	0				0
	0.18017				0.337075
	0				0
	0.582682				0.672737
	0.242521				0
	0.455215				0
	0.430206				0
	0.196216				0
	0.309252				0
	0				0.499318
	0.493984				0.3489
	0				0.540118
	0.542802				0
	0				0
	0				0.366898
	0.15265				0.638922
	0.457891				0
	0.509117				0
	0.51389				0.468394
	0				0
	0.348489				0.634911
	0				0.326277
	0.554143				0.380274
	0				0
	0				0.571173
	0.259162				0.459865
	0.467843				0
	0.497921				0
	0				0
	0.604366				0.269551
	0.554463				0.094292
	0.401234				0.573214
	0.36328				0
	0.476132				0
	0.438217				0
	0				0
	0.454987				0
	0.511596				0
	0.530645				0
	0.428478				0.237653
	0				0
	0.087354				0
	0				0.254638
	0.590835				0
	0				0.542692
	0				0
	0.392948				0.601803
	0				0.271045
	0.492892				0.108154
	0				0
	0.150942				0.291687
	0				0.252432
	0				0.609978
	0.494074				0
	0.419651				0.477175
	0				0
	0.576188				0
	0				0
	0.546865				0.483777
	0.507357				0
	0				0.550162
	0.476206				0.464534
	0.598498				0.546812
	0.648129				0.350716
	0.459329				0
	0.663468				0
	0				0.245275
	0				0.496578
	0				0
	0.510393				0
	0				0
	0.541994				0
	0				0
	0.447779				0.289254
	0				0.409493
	0.540024				0
	0.481243				0.364099
	0				0
	0				0
	0.576853				0.459097
	0				0.293124
	0.674288				0.576801
	0.488306				0.632103
	0				0
	0				0.498568
	0				0.4924
	0.475134				0
	0				0.517263
	0				0
	0				0.385154
	0.434679				0
	0.415924				0
	0.410457				0
	0.440516				0.322402
	0				0
	0				0.530771
	0				0
	0				0.352286
	0.433704				0.359142
	0.406018				0.84462
	0				0
	0.512237				0.403385
	0				0.540627
	0.333981				0
	0.631225				0
	0.064599				0
	0				0
	0.425811				0.533111
	0.340707				0.264899
	0.594858				0
	0				0
	0				0.578799
	0.355216				0.21318
	0.271195				0
	0.53667				0
	0.357187				0
	0				0.452295
	0.494062				0.424872
	0				0.540607
	0				0
	0.423464				0.531014
	0.571501				0
	0				0
	0.56526				0.394966
	0.490289				0
	0.287865				0.479459
	0.505973				0
	0.467192				0.626539
	0.444505				0.485277
	0				0
	0.532747				0
	0.569079				0.555369
	0				0
	0.226172				0.54212
	0				0
	0				0
	0.586139				0.4752
	0				0.91856
	0.709267				0.482066
	0				0
	0.531705				0.536603
	0				0
	0.419507				0
	0.447015				0.536752
	0.662914				0
	0.424681				0
	0.549736				0.336756
	0.350731				0.572412
	0				0.557764
	0.360678				0.217743
	0.537303				0
	0.672036				0
	0				0
	0.247738				0
	0				0.456734
	0.534959				0.62151
	0.589821				0
	0.514968				0
	0				0
	0				0.553887
	0				0.612853
	0				0.538189
	0.466181				0.514009
	0				0
	0				0.38738
	0				0
	0.554244				0.443603
	0.659533				0
	0				0
	0.555272				0.484299
	0				0
	0.51793				0
	0				0.484956
	0				0.276499
	0				0.59364
	0				0.379518
	0.562081				0
	0				0.307961
	0.524929				0
	0				0
	0				0.477005
	0.374289				0.384274
	0.573156				0.355724
	0.351227				0
	0.568393				0
	0.581915				0.367053
	0				0.247235
	0				0.664376
	0.532637				0.516569
	0.285882				0.325899
	0.39781				0
	0.470194				0
	0				0
	0.55163				0.547439
	0.55436				0.188228
	0				0
	0				0
	0				0.452133
	0.562705				0
	0.441132				0
	0				0
	0.370197				0.614517
	0.408711				0.248295
	0				0
	0				0
	0.585757				0
	0				0
	0.525489				0.178985
	0.396539				0
	0.554837				0.458498
	0				0.205932
	0.555156				0
	0				0
	0.551786				0
	0.575331				0
	0.55019				0
	0.484454				0.223193
	0.562448				0
	0				0
	0				0.45109
	0.604774				0
	0.254068				0.128064
	0				0.396536
	0				0.30242
	0.338902				0.544181
	0				0
	0.469575				0
	0				0
	0.782672				0
	0.509662				0
	0				0.41514
	0.305311				0.377202
	0				0.2804
	0.452062				0
	0.555825				0.066828
	0				0
	0.323724				0
	0.338196				0.3385
	0.599871				0.350847
	0				0.341348
	0.377257				0.727812
	0				0
	0				0
	0.57816				0.258405
	0.444559				0
	0				0.48698
	0				0
	0.465891				0
	0.259334				0.359837
	0.554245				0
	0.539367				0.401652
	0				0.51559
	0				0
	0.5736				0.234405
	0.445204				0
	0.483053				0.373297
	0.45571				0.48582
	0				0
	0				0.344169
	0				0.380689
	0				0
	0.330352				0
	0.229441				0
	0.458574				0
	0.640875				0
	0.500295				0
	0				0.132864
	0				0
	0.570784				0.233728
	0				0
	0.512503				0.371601
	0.564109				0
	0.547011				0.442883
	0				0
	0.492466				0.578919
	0.428368				0
	0.376174				0
	0.641957				0.369249
	0				0
	0				0.263973
	0.478051				0
	0.520672				0.210278
	0.532695				0.614712
	0				0
	0.530431				0
	0.598681				0.522395
	0				0
	0.16192				0
	0				0.345677
	0.349926				0.56182
	0.642164				0.734083
	0.425464				0
	0				0
	0.3838				0.402987
	0.240271				0
	0				0.252682
	0.404286				0.447944
	0.376932				0.297372
	0.436278				0.273211
	0				0.308984
	0				0.449792
	0.452377				0.490089
	0				0.39041
	0				0.449602
	0				0.105693
	0.554678				0.585852
	0				0
	0.786124				0.226673
	0.363855				0.546394
	0				0.248655
	0.46605				0.32998
	0.521694				0
	0.365837				0
	0				0.253834
	0				0
	0				0
	0				0.13093
	0.537331				0.459504
	0.438126				0
	0.788423				0.678519
	0.6632				0.478237
	0				0
	0				0
	0.517668				0
	0				0
	0.357211				0
	0.556346				0.536787
	0				0.552785
	0				0.583585
	0.499102				0
	0				0.270861
	0				0.607457
	0.555562				0.343387
	0.46423				0.476924
	0.212941				0.524542
	0.347256				0
	0				0
	0				0.577854
	0.614096				0
	0				0.264568
	0.214551				0.61569
	0				0.534327
	0				0
	0.424529				0.449692
	0				0.456401
	0.413459				0
	0.36917				0
	0				0.313692
	0.638937				0.345192
	0				0.585093
	0				0
	0				0.330523
	0				0
	0.53975				0
	0				0.459318
	0				0.532107
	0				0.435012
	0.302339				0.483492
	0				0
	0.532552				0.428421
	0				0
[truncated: 1,249 more rows]
