# Supplementary material for: Context-dependent modification of PFKFB3 in hematopoietic stem cells promotes anaerobic glycolysis and ensures stress hematopoiesis
Source: eLife. 2024 Apr 4;12:RP87674. doi: 10.7554/eLife.87674 (PMC10994660; doi:10.7554/eLife.87674)
Supplement: Figure 5—source data 1. [file elife-87674-fig5-data1.xlsx]

## Sheet: Figure 5D
HSC	HSC (2-DG)	MPP	MPP (2-DG)	GMP	GMP (2-DG)	MEP	MEP (2-DG)	CMP	CMP (2-DG)	CLP	CLP (2-DG)
0.695933	0.684973	0.691331	0.427943	0.620118	0.496448	0.892974	0.763892	0.575566	0	0.616771	0.67032
0.696428	0.543132	0.676589	0.506728	0.490037	0.583635	0.624734	0.547536	0.595406	0.436649	0.591548	0.544716
0.708511	0.571538	0.746017	0.657425	0.665206	0	0.71365	0.731189	0.53648	0.473818	0.602302	0.587701
0.663816	0.62034	0.693123	0.592572	0.526301	0.499317	0.65909	0.455185	0.63237	0.521471	0.698666	0
0.721153	0.217585	0.739162	0.608189	0.571275	0	0.282696	0.852719	0.313237	0.177382	0.58671	0.667143
0.681286	0.726618	0.585177	0.700378	0.552329	0.326385	0.447517	0	0.567924	0	0.665811	0.536694
0.688244	0.691927	0.670071	0.448457	0.646039	0.663148	0.54981	0.565066	0.489781	0.562876	0.633845	0.700263
0.677656	0.754919	0.680632	0.410453	0.642276	0.237046	0.273481	0.639703	0.593302	0	0.630102	0.507904
0.647529	0.649092	0.693869	0.795802	0.587343	0.23014	0.566982	0.373615	0.46777	0	0.692535	0.554877
0.6322	0.754015	0.693011	0.649857	0.574131	0.45502	0.605547	0.486819	0.542347	0	0.583622	0.771968
0.70063	0.668895	0.64084	0.485925	0.616585	0.563013	0.548241	0.533305	0.582226	0.507061	0.611564	0.699698
0.724806	0.595297	0.809956	0.682423	0.548979	0	0.741627	0.508539	0.501331	0.596269	0.683416	0.807687
0.789606	0.674145	0.645851	0.729045	0.496084	0.530116	0.31373	0.636275	0.488233	0.541042	0.641606	0.643397
0.719384	0.412326	0.702315	0.359593	0.511946	0.379038	0.552735	0.39713	0.620406	0.480965	0.708886	0.571992
0.764113	0.643267	0.703423	0.664497	0.549063	0.318734	0.626635	0.331915	0.57299	0.559081	0.693289	0.636048
0.635983	0	0.670865	0.311211	0.513913	0	0.418114	0.566031	0.48302	0.45953	0.534378	0.712641
0.673246	0.388029	0.596036	0.477588	0.49111	0.56294	0.440841	0.603125	0.61168	0.485617	0.616384	0.645593
0.651345	0.56634	0.756338	0	0.492785	0.529038	0.638987	0.514159	0.533308	0.254716	0.671911	0.695693
0.71322	0.689065	0.689604	0.616408	0.732535	0.519422	0.558064	0.535142	0.600275	0.38701	0.595717	0.685917
0.768682	0.710418	0.690578	0.593683	0.517521	0.131775	0.422381	0.547438	0.730637	0.102924	0.609894	0.720653
0.681946	0.3893	0.659627	0.613699	0.666929	0.379105	0.577927	0.580907	0.613089	0.505882	0.675153	0
0.615364	0.626625	0.64328	0.760386	0.531916	0.208734	0.593726	0.525624	0.583192	0	0.760338	0.588534
0.707016	0.315519	0.717407	0.552793	0.566555	0.34438	0.4055	0.438959	0.577724	0.760955	0.677473	0.671188
0.648742	0	0.676065	0.518772	0.586609	0.532966	0.665645	0.457408	0.643598	0.389628	0.692007	0.541814
0.72076	0.712885	0.681491	0.582348	0.42161	0.416193	0.675492	0.340531	0.449995	0.5032	0.547824	0.575996
0.289298	0.7776	0.648815	0.472603	0.444287	0.542027	0.561049	0.628727	0.565027	0	0.62263	1.08435
0.732871	1.38054	0.676856	0.606636	0.458314	0	0.321139	0	0.314069	0	0.742806	0.731548
0.637736	0.599499	0	0.229769	0.571299	0	0.792632	0.286964	0.542077	0.392226	0.641839	0.748664
0.679405	0.761506	0.69661	0.554327	0.595977	0.349068	0.613879	0.61909	0.585452	0	0.656903	0.736187
0.521623	0.644905	0.693532	0.802877	0.555046	0.540515	0.573201	0.584459	0.576465	0.207628	0.687513	0.569246
0.654222	0.609631	0.609302	0.684266	0.552226	0.499871	0.697009	0.552855	0.422916	0	0.673076	0.809937
0.702474	0	0.560438	0.520993	0.607458	0	0.360357	0.434387	0.4853	0	0.524131	0
0.720567	0.63085	0.662571	0.659837	0.52	0.552304	0	0.567204	0.544887	0.348642	0.561232	0
0.652003	0.718605	0.656296	0	0.489802	0.558994	0.399236	0.333247	0.550264	0.231821	0.682588	0.658932
0.636137	0.460021	0.617333	0.627132	0.660813	0.339898	0.615473	0.587427	0	0	0.616819	0.352678
0.696992	0.700752	0.623838	0.504775	0.553537	0.531355	0.426513	0.659642	0.508995	0.49731	0.548044	0.663662
0.712546	0	0.543561	0.804504	0.565517	0	0.653147	0.364353	0.557797	0.311071	0.682212	0.58317
0.363111	0.529723	0.726042	0.514841	0.513258	0	0.429995	0.501475	0	0	0.624477	0.718588
0.619427	0.563213	0.538749	0.762318	0.571779	0.464115	0.535152	0.580762	0	0.346266	0.546366	0.721562
0.674967	0.683318	0.657771	0.375163	0.130323	0.487867	0.57054	0.374502	0.601296	0	0.680181	0.570295
0.734974	0	0.677338	0.660406	0.600536	0.564189	0.605568	0.618886	0.613875	0.324354	0.581031	0.762241
0.646759	0.708608	0.990982	0.639895	0.580522	0.12737	0.723433	0.575015	0.712152	0.581203	0.649612	0.427104
0.686151	0.710856	0.565613	0.315573	0.48152	0.433696	0.774512	0.395897	0.410026	0.27223	0.668936	0.743194
0.713049	0.691266	0.720789	0.701295	0.523565	0	0.680202	0.542671	0.643377	0.543399	0.559095	0.276156
0.664453	0.706585	0.615264	0.517375	0.565861	0.47787	0.496148	0.580311	0.617166	0.443474	0.62932	0
0.678887	0	0.672332	0.61895	0.561042	0.527826	0.602498	0.472224	0.688385	0.452963	0.684215	0.628196
0.702345	0	0.53005	0.535093	0.558614	0.403277	0.579302	0.674649	0.441217	0.259261	0.642053	0.801851
0.747719	0.710654	0.667311	0.49447	0.507176	0.201725	0.4137	0	0.514161	0.399873	0.633701	0.7338
0.656428	0.674151	0	0.685501	0.546862	0.464268	0.506957	0.64301	0.479346	0.728408	0.47166	0.727036
0.687622	0.647239	0.665409	0.615846	0.548027	0	0.580313	0.616719	0.587595	0.495946	0.651112	0.660413
0.658463	0.627547	0.673527	0.689034	0.632058	0.56395	0.671769	0.782393	0.618322	0.54222	0.634685	0.599298
0.775176	0.576577	0.622409	0.647961	0.53447	0.448207	0.670192	0.727284	0.285814	0.573438	0.688527	0.61878
0.691276	0.61474	0.622149	0.507549	0.564749	0.44434	0.550154	0	0.297506	0.540976	0.631291	0.528615
0.723722	0.685118	0.61785	0.320713	0.534522	0	0.625381	0.5986	0.617579	0.563751	0.704337	0.675262
0.70515	0.546407	0.621968	0.662541	0.545712	0.407041	0.62477	0	0.598399	0.407161	0.448952	0.63254
0.698981	0.7164	0.617844	0.642626	0.503147	0	0.479553	0.569068	0.306497	0	0.574578	0.575402
0.670676	0.704773	0.547205	0.365188	0.467983	0.506392	0	0.41818	0.579204	0.536394	0.600123	0.719232
0.798179	0.679026	0.664387	0.778598	0.583272	0.398538	0.386932	0.549813	0.593175	0	0.577683	0.523128
0	0.703469	0.618366	0.652044	0.644119	0.536831	0.621361	0.514041	0.558466	0.638395	0.70633	0.585698
0.645368	0.718262	0.61218	0.528334	0.553555	0.445767	0.547591	0.663731	0.529163	0	0.578677	0.582902
0.736838	0.608286	0.744847	0.567949	0.468666	0	0.677643	0.467695	0.640431	0.386965	0.578723	0.757825
0.702484	0.630766	0.710217	0.60246	0.5799	0	0.41193	0.557943	0.519689	0	0.636497	0.67953
0.727941	0.704234	0.712002	0.475983	0.557137	0.150585	0.560892	0.532806	0	0.574375	0.673794	0.593549
0.718167	0.745672	0.405865	0.556368	0.62527	0.503574	0.591131	0.421386	0.673942	0	0.706633	0.637998
0.609774	0.610728	0.649721	0.491891	0.166565	0.376584	0.327462	0.298792	0.624885	0.520424	0.626456	0.716468
0	0.608284	0.611417	0.611008	0.5573	0	0.553929	0.266549	0.620514	0	0.649831	0.563185
0.732952	0.68702	0.605638	0.791118	0.435374	0	0	0.272297	0.627523	0.567755	0.600972	0.632035
0.664088	0.788224	0.664499	0.517455	0.67002	0.466992	0.537841	0	0.636918	0	0.637353	0.614784
0.73234	0.712271	0.667923	0.55943	0.517674	0.445365	0.608354	0.384397	0.274604	0.182025	0.727597	0.643543
0	0.745191	0.747594	0.633212	0.638006	0.384172	0.365877	0.731247	0.747358	0.540512	0.573716	0.661779
0.603672	0.681607	0.622242	0.570128	0.57186	0.548437	0.616805	0.109743	0.567436	0.543171	0.605244	0.719842
0.69403	0.319362	0.691456	0.515901	0.522798	0	0.567062	0.657131	0.697867	0.250107	0.622058	0.594825
0.738221	0.628186	0.63458	0.704519	0.580995	0	0.545202	0.496436	0.553853	0.325207	0.797441	0.412201
0.709352	0.670142	0.903279	0.203953	0.580703	0	0.640885	0	0.568777	0.498919	0.6351	0.510218
0.626876	0.667689	0.231243	0.596411	0.629355	0.505299	0.59793	0.430377	0.568333	0.273558	0.616947	0.58798
0.715734	0.590488	0.583809	0.441729	0.703374	0	0.704505	0.500743	0.549715	0	0.731417	0.619726
0.706804	0.754589	0.638652	0.52801	0.517213	0.583454	0.396519	0.480049	0.505641	0.346115	0.625598	0.769018
0.719866	0.419479	0.713307	0.825719	0.469784	0.581526	0.643274	0.328962	0.540185	0.296678	0.684947	0.682021
0.715813	0.623511	0.645151	0.581402	0.638244	0	0.82248	0.168959	0.586197	0.445595	0.623152	0.633143
0.719314	0.689171	0.60968	0.654538	0.56071	0.647894	0.505988	0.125988	0.65392	0.507238	0.551463	0.690429
0.693115	0.719591	0.772737	0.481171	0.481988	0.61591	0.541318	0.628562	0.550687	0.174449	0.519582	0.616461
0.774832	0.585143	0.64259	0.296426	0.47485	0	0.630327	0.634489	0	0.382639	0.609589	0.696915
0.648215	0.636254	1.1643	0.63834	0.381223	0.401009	0.429874	0.382106	0.577287	0.552261	0.626813	0.737303
0.624118	0.65264	0.552177	0.700243	0.577087	0	0.737655	0.298852	0.518713	0.220831	0.631792	0.770772
0	0.716444	0.679301	0.564777	0.549339	0	0.607753	0.457254	0.565902	0.578273	0.455003	0.68984
0.700225	0.587438	0.592961	0.664034	0.531827	0	0.706987	0.357302	0.526613	0.426429	0.618402	0.618251
0.647933	0.673459	0.633537	0.601152	0.573067	0.199901	0.687563	0.528597	0.568517	0.509703	0.5986	0.750398
0	0.622663	0.679423	0.351668	0.494005	0.550595	0.450021	0.576268	0.586204	0.355551	0.686139	0.64922
0.572061	0.569492	0.646498	0	0	0	0.695955	0.5806	0.543695	0.544502	0.729086	0.561548
0.69155	0.600584	0.611526	0	0.495728	0.341587	0.702366	0	0.65674	0.580992	0.671711	0.568936
0.652592	0.643831	0.606197	0.316848	0.592509	0	0	0.397272	0.581876	0	0.794186	0.635019
0.474528	0.575561	0.672901	0.663166	0.435614	0.281245	0.611954	0.469312	0.545121	0	0.608882	1.878
0.618231	0.646112	0.657536	0.683095	0.715774	0.583581	0.460361	0.574414	0.558414	0	0.655057	0.677161
0.708085	0.774289	0.71461	0.595627	0.59238	0.670068	0.693152	0.662285	0.666727	0.349135	0.663052	0.330093
0.762771	0.645218	0.789202	0.638057	0.609751	0	0	0.640157	0.573246	0	0.645632	0.562395
0.770888	0.546642	0.72958	0.603007	0.619783	0.266547	0.628348	0	0.566367	0	0.717652	0.671545
0.722073	0.532263	0.711794	0.630546	0.486778	0.514524	0.82293	0.588534	0.579818	0	0.558879	0.622717
0.698609	0.667297	0.666861	0.420411	0.513	0.533397	0.634057	0.412153	0	0.487712	0.636385	0.640964
0.743695	0.725956	0.665617	0.547102	0.607329	0.270697	0.652974	0.493473	0.681594	0.580587	0.709197	0.647708
0.671066	0.445849	0.697837	0.72402	0.611726	0	0.54919	0.67129	0.615803	0	0.589774	0.631553
0.707769	0.257759	0.328684	0.685702	0.580251	0.529811	0.657162	0.50005	0.560561	0.618984	0.72985	0.552977
0	0.601259	0.729764	1.02503	0.475526	0.557481	0.738806	0.285078	0.548238	0.330427	0.595275	0.661257
0.73393	0.42049	0.565146	0.725324	0.516618	0.432475	0	0	0.575836	0.459376	0.606218	0.562889
0.668379	0.725388	0.657382	0.506449	0.626195	0.718505	0.435316	0	0.530796	0	0.642454	0.31259
0.682126	0.622076	0.694536	0.404691	0.579719	0.338077	0.713893	0.301996	0.902181	0.320131	0.577126	0.69639
0.701121	0.622106	0.591237	0.529263	0.550953	0	0.717709	0	0.594291	0	0.553587	0.563919
0.78625	0.825661	0.694246	0.500218	0.556117	0.33074	0.647612	0.493615	0.520414	0.547925	0.624913	0.643078
0.767583	0.607525	0.546719	0.556458	0.544704	0.519344	0.757767	0.286139	0.718901	0	0.619038	0.768716
0.738718	0.615864	0.688167	0.322649	0	0	0.636459	0.237366	0.549579	0.368721	0.679558	0.552198
	0.583473	0.668999	0.525958	0.601835	0	0.676055	0	0.602431	0.476233	0.253737	0.544483
	0.616352	0.533269	0.390062	0.669789	0.282798	0.756918	0.513133	0.638929	0.527848	0.648125	0.578074
	0.54095	0.677768	0.665232	0.642968	0.414313	0.234099	0.180988	0.574393	0	0.618396	0.641682
	0	0.628137	0.716809	0.503781	0	0.679062	0.428106	0.601981	0.595347	0.69666	0.356351
	0.682956	0.599008	0.441122	0.543445	0.329964	0.549474	0	0.438667	0.406959	0.640629	0
	0.681436	0.650469	0	0.531362	0	0.684346	0.703585	0.581553	0.421883	0.681403	0
	0.565646	0.652518	0.595771	0.443557	0.348351	0.71714	0.484051	0.567649	0	0.602475	0
	0.722152	0.608292	0.615164	0.586171	0.23543	0.459698	0.52032	0.542996	0.476721	0.657296	0.617868
	0.59523	0.254326	0.607448	0.605329	0.615368	0.535267	0.532863	0.565442	0.062493	0.721551	0.758034
	0.602163	0.650813	0.581862	0.528438	0.367526	0.748762	0.483678	0	0	0.680291	0.633951
	0.644109	0.679636	0.646833	0.556649	0	0.667159	0	0.648116	0.294472	0.663535	0.58931
	0.561507	0.637732	0.771659	0.530981	0.524313	0.200181	0.301807	0.548486	0.435036	0.666062	0.295275
	0.564137	0.622408	0.656974	0.587367	0	0.628395	0.425759	0.538261	0.393566	0.621778	0.658585
	0.692137	0.745406	0.297066	0.516947	0	0.581651	0.515029	0.329383	0.46734	0.59723	0
	0.631689	0.65992	0.652378	0.610564	0	0.859137	0	0.54175	0.448447	0.618104	0.541353
	0.768389	0.652755	0.585408	0.534212	0.640937	0.30452	0.626772	0.423971	0	0.66119	0.539831
	0.596865	0.613838	0.695765	0.630831	0.354729	0.652156	0.323546	0.385356	0.374561	0.637339	0
		0.709731	0.610146	0.491881	0.349004	0.548238	0.600388	0.543643	0	0.630426	0.39977
		0.740904	0.457456	0.65007	0.501116	0.551484	0.563158	0.607617	0	0.63695	0.595492
		0.735257	0.525546	0.579675	0	0.491514	0.552616	0.598137	0.495055	0.72775	0.662016
		0.70312	0.624941	0.51217	0.407887	0.479436	0.345563	0.822855	0.305958	0.589514	0
		0.544979	0.535525	0.545756	0.176776	0.15002	0.464766	0.398876	0.531598	0.580268	0.688569
		0.823271	0.566105	0.640991	0.33765	0.54454	0.668249	0.61532	0	0.65015	0.289702
		0	0.284443	0.193362	0.47976	0.655369	0.506076	0.570011	0	0.679252	0.676023
		0.658539	0.76664	0.633675	0	0.694008	0.671818	0.628936	0.252401	0.635229	0.548046
		0	0.455302	0.65808	0.677407	0.631283	0.202415	0.579316	0	0.59772	0.667359
		1.06224	0.49275	0.61543	0	0.719856	0.677701	0.644353	0.318584	0.566973	0
		0.686216	0	0.617918	0	0.414652	0.386471	0.642258	0.501994	0.563181	0.448591
		0.645226	0.580764	0.526621	0	0.675675	0.497857	0.689658	0	0.68544	0.563237
		0.681785	0.825025	0.657659	0	0	0.392464	0.689725	0	0.658734	0.634259
		0.653942	0.577657	0.591673	0	0	0.628148	0.629638	0.295089	0.589128	0.709952
		0.748539	0.713379	0.52867	0	0.478704	0.396062	0.530337	0.623102	0.54015	0.671945
		0.644047	0.612105	0.541934	0.472797	0.728436	0.599069	0.572328	0	0.656187	0.66175
		0.643732	0.437991	0.538476	0.499559	0.37803	0	0.67585	0.39164	0.597495	0.473461
		0.599837	0.286224	0.205149	0.519491	0.44831	0	0.47055	0.32941	0.432893	0.650527
		0.670008	0.679824	0.601745	0.321878	0.563792	0.549915	0.69248	0	0.729888	0.714779
		0.711942	0.359008	0.562857	0.386597	0.688846	0	0.593299	0.460533	0.626744	0.251202
		0.695912	0.580059	0.596174	0.350061	0.534935	0.667724	0.603963	0.188721	0.717601	0.676043
		0.630237	0.555798	0.654002	0.446909	0.605867	0.187874	0.564624	0.499156	0.655177	0.700344
		0.67132	0.556889	0.498485	0	0.704521	0.71882	0.580305	0.61252	0.631393	0.635887
		0.636874	0.732141	0.56876	0.500425	0.633954	0.368222	0.601142	0	0.707583	0.697377
		0.754127	0.589733	0.639685	0	0.630527	0.446412	0.550414	0.286468	0.62166	0.638124
		0	0.499231	0.319276	0.475157	0.336662	0.458889	0.62887	0	0.631803	0.608333
		0.62059	0.466134	0.22139	0	0.570737	0.364015	0.610464	0.624632	0.659931	0.69096
		0.732297	0.505113	0	0.329738	0.511896	0.369225	0.624974	0.548964	0.563114	0.603027
		0.692782	0.433853	0.575774	0.560588	0.792387	0.630388	0.643216	0.296674	0.746813	0.604582
		0.62009	0.534417	0.548126	0.426216	0.355491	0.361752	0.311762	0.485168	0.646946	0.755742
		0.544965	0.683223	0.485204	0.331022	0.557091	0	0.602016	0	0.592837	0.654176
		0.686255	0.511055	0.618033	0.485921	0.651404	0.52821	0.547557	0.249777	0.643145	0.503962
		0.506733	0.547599	0.539934	0.413902	0.42593	0.499858	0.534722	0	0.632003	0.62561
		0.696116	0.864474	0.52727	0.338635	0.597506	0	0.549811	0.333639	0.670543	0.572292
		0.718022	0.627075	0.543241	0	0.630392	0	0.555233	0	0.594241	0.631376
		0.620073	0.597884	0.572448	0	0.61973	0.42637	0.601896	0	0.801369	0.268413
		0.744207	0	0.56779	0	0.352108	0.458872	0.598641	0.551761	0.672674	0.582633
		0.66518	0.396179	0.531921	0.434321	0.428247	0.432645	0.663838	0.473388	0.704053	0.637119
		0.730596	0.746398	0.609987	0.551054	0.647622	0.570858	0.575133	0.395855	0.662782	0
		0.651884	0.511643	0.499117	0.652861	0.557572	0.453243	0.346172	0.573081	0.589615	0.562907
		0.711523	0.545577	0.508746	0.270881	0.501654	0.5574	0.541862	0.889427	0.588312	0.694074
		0.708776	0.39637	0.551151	0.477848	0.700232	0	0.522951	0	0.675427	0.651967
		0.593119	0	0.507363	0	0	0.694074	0.5807	0	0.715246	0.747534
		0.197774	0.614023	0.54766	0.500669	0.411828	0.436296	0.635596	0.264962	0.678688	0.586418
		0.702204	0.689314	0.53847	0.398002	0.679395	0.587258	0.602119	0.404674	0.629094	0
		0.618582	0.433619	0.403006	0	0.661966	0.582939	0.642855	0.258286	0.626472	0.620063
		0.690141	0.706632	0.643057	0.548619	0.688362	0.386515	0.328333	0.275549	0.649573	0.569093
		0.636548	0.649279	0.599249	0.511001	0.593675	0.389328	0.394898	0	0.641551	0.643334
		0.701981	0.560943	0.722104	0.427227	0.437919	0.436005	0.679439	0.533131	0.634032	0.694012
		0.621386	0.524936	0.556923	0	0.490351	0.315597	0.438869	0	0.542561	0.685636
		0.66795	0.430691	0.422924	0.16508	0.62598	0.546181	0.544124	0.506389	0.599767	0.551067
		0.708719	0.508342	0.562274	0.310286	0.342157	0.594577	0.656371	0.341246	0.568675	0.653864
		0.544232	0.479135	0.611776	0.421049	0.526287	0.575029	0.113673	0	0.618027	0.688255
		0.666023	0.447929	0.541298	0.327318	0.399193	0.537296	0.500622	0.565141	0.698897	0.620492
		0.673082	0.707456	0.485954	0.351472	0	0.513207	0.626093	0.618877	0.630594	0.661109
		0.717163	0.454736	0.556056	0.558244	0.722659	0.55936	0.598808	0	0.754415	0.475626
		0.695123	0.586718	0.49901	0	0.500939	0	0.616738	0.396395	0.589727	0.353353
		0.661926	0.522952	0.612489	0.229391	0.56108	0.543144	0.603798	0.250843	0.692779	0.6492
		0.734273	0	0.620585	0	0.588678	0.812133	0	0.229357	0.645795	0.873494
		0.757075	0.567405	0.504415	0.446876	0.645943	0.387485	0.505575	0.418444	0.608901	0.735027
		0.684306	0.737178	0.28287	0	0.414598	0.44532	0.561619	0.427448	0.716884	0.575487
		0.671268	0.692868	0.641561	0.234515	0.671877	0.563606	0.577933	0	0.587283	0.756998
		0.670368	0.579635	0.580916	0	0.566556	0.506369	0.466866	0.495804	0.572205	0.353416
		0.64476	0.554703	0.670194	0.295555	0.572433	0.578762	0.617634	0.400559	0.636997	0.707359
		0.679208	0.489341	0.632881	0.594178	0.555523	0	0	0	0.692021	0.348899
		0.616147	0.152201	0.345627	0.436053	0.502344	0.239209	0.600505	0.388401	0.740506	0.71745
		0.712187	0.727181	0.483733	0	0.616236	0.281753	0.671297	0.614825	0.671161	0
		0.693007	0.791528	0.490686	0	0	0.431233	0.261964	0.361894	0.629013	0
		0.592369	0.53935	0.635093	0.511782	0.614605	0.536939	0.62729	0.389223	0.567229	0.669428
		0.591579	0.570203	0.556947	0.620827	0.638203	0.347366	0.547401	0.238725	0.758874	0.561702
		0.641427	0.48148	0.545368	0	0.504991	0.522147	0.528124	0.283426	0.667752	0.535502
		0.594971	0.541815	0.581404	0	0.757123	0.607146	0.515084	0	0.640773	0.643143
		0.545102	0.758639	0.530093	0.479509	0.412362	0.719985	0.521453	0	0.586186	0.715085
		0.654542	0.713053	0.558347	0	0.52105	0.609424	0.634582	0.318992	0.679689	0.645523
		0.728464	0.776995	0.611497	0.546782	0.646359	0.465478	0.738479	0	0.691039	0.376488
		0.750806	0.450195	0.191739	0.567064	0.6711	0.520715	0.461951	0.406742	0.584425	0.627907
		0.598144	0.639697	0	0.358285	0.573488	0.447085	0.655074	0.416586	0.583743	0.764974
		0.648287	0.690451	0.586144	0	0.612659	0.546416	0	0.609733	0.690869	0.642497
		0.640247	0.603662	0.601495	0	0.555105	0.50905	0.607104	0	0.726036	0.574529
		0.700693	0.591888	0.567568	0.228223	0.580344	0.369737	0.593941	0.371545	0.535019	0.600749
		0.947328	0.609585	0.52571	0.264281	0.490229	0	0.64157	0	0.616754	0.503776
		0.594428	0.710314	0.607092	0.4333	0.420249	0.375366	0.517648	0.343996	0.8327	0.166431
		0.611734	0.544504	0.633548	0.521845	0.562664	0.332458	0.261414	0.285959	0.628507	0.622701
		0.737997	0.583964	0.479778	0.254596	0.617233	0.308551	0.615538	0	0.653466	0.568967
		0.672013	0.639364	0.541065	0.662251	0.771751	0.362784	0.579305	0.575305	0.689303	0.544809
		0.673943	0.548031	0.539234	0.436254	0.27329	0.374432	0.384745	0	0.598405	0.714403
		0.742788	0.526926	0.59255	0	0.489951	0.221054	0.650672	0	0.66397	0.575286
		0.642459	0.536386	0.661557	0.463409	0.572719	0.682555	0.748212	0.396552	0.643967	0.544942
		0.624103	0.272744	0.574149	0.221303	0.536167	0	0.417462	0.304441	0.611235	0.480826
		0.71049	0.684695	0.501188	0	0.458538	0.704542	0.542511	0.33212	0.63863	0.528046
		0.656394	0.658373	0.537641	0.15647	0.524164	0.70622	0.628595	0	0.708281	0.642048
		0.650093	0.611229	0.577532	0.518688	0.305558	0.641164	0.599791	0.430419	0.711145	0.632887
		0.709261	0.622991	0.510973	0	0.552092	0.469226	0.580981	0.323832	0.636738	0.624305
		0.593486	0.425174	0.583628	0.422814	0.39052	0.507717	0.488388	0	0.587661	0
		0.635916	0.575371	0.616167	0.55613	0.390403	0.516505	0.551478	0	0.678118	0.630009
		0.607642	0.746417	0.626287	0	0	0.451677	0.480132	0.364764	0.639927	0.618103
		0.451896	0.687538	0	0.421646	0.630894	0.17227	0.405407	0.462481	0.689926	0.560489
		0.652092	0.670971	0.547317	0.574342	0.610865	0	0	0	0.676189	0.573853
		0.666124	0.708573	0	0.5772	0.591963	0.121025	0.531544	0.56695	0.577808	0.191388
		0.648644	0.597061	0.480772	0.498364	0.59719	0.679003	0.556485	0.269842	0.703359	0.626145
		0.66243	0.458448	0.639275	0.478362	0.63503	0.429926	0	0	0.64	0.625308
		0.617896	0.359741	0.551375	0	0.521214	0.439823	0.604032	0.56592	0.590332	0.519172
		0.741376	0.525405	0.514064	0.500176	0.564012	0.35217	0.610885	0.46901	0.727196	0.727565
		0.686006	0.646104	0.571042	0.382241	0.742133	0.22712	0.461969	0	0.731991	0.713146
		0.691758	0.504531	0.56847	0	0.652053	0.449534	0.651259	0	0.680085	0.748202
		0.668078	0.618457	0.569051	0.352327	0.645774	0.448256	0.634831	0	0.600073	0.730782
		0.695351	0.712357	0.514179	0	0.575669	0.657037	0.661142	0.619663	0.670898	0.561827
		0.331114	0.652864	0.587365	0.467738	0.766291	0.535172	0.661153	0.550966	0.589867	0.736753
		0	0.467309	0.588833	0.597889	0.60255	0.531617	0.599341	0	0.641092	0.419539
		0.687438	0.295	0.666216	0	0.551599	0.671936	0.608186	0	0.553336	0.446608
		0.642833	0.640917	0.608408	0.430205	0.674037	0.503588	0.521101	0.302385	0.589712	0.542255
		0.668297	0.684264	0.739275	0.484476	0.597387	0.553513	0.622721	0	0.619791	0.737069
		0.658556	0.601796	0.584387	0.519711	0.487495	0.314475	0.563538	0.449093	0.709501	0.669412
		0.67024	0.651062	0.547519	0	0.636311	0.350714	0.534396	0.600001	0.588723	0.632802
		0.652076	0.362413	0.606208	0	0.101784	0.509648	0.536192	0.532076	0.523024	0.724367
		0.631762	0.572813	0.553349	0	0.649529	0	0.583874	0.476072	0.606543	0.639032
		0.647282	0.562248	0.478864	0.309868	0.704998	0.323611	0.596946	0.559023	0.720244	0.698002
		0.24662	0.488297	0.52032	0.497684	0.517953	0.177254	0.590239	0	0.652089	0.646377
		0.652561	0.536719	0.525281	0.476737	0.409208	0	0.550316	0.241186	0.573786	0
		0.629492	0.738902	0.566011	0.486275	0.476468	0.607327	0.402726	0.14641	0.655192	0.708094
		0.66038	0.513099	0.567925	0	0.708514	0.485433	0.444481	0.232299	0.715692	0.72726
		0.560291	0.529955	0.618118	0.251981	0.564588	0.449295	0.714665	0.374226	0.664646	0.594195
		0	0.513868	0.256318	0.553389	0.529074	0.621748	0.440646	0.477311	0.631679	0.498476
		0.679835	0.660602	0.583231	0.582554	0.556556	0.60743	0.582076	0.56858	0.603575	0.367643
		0.623587	0.668159	0.469289	0	0.681464	0.46089	0.523786	0	0.838522	0.528351
		0.685907	0.472336	0	0.339516	0.75742	0.5595	0.594419	0.354173	0.626813	0.548666
		0.671586	0.78052	0.492749	0.366294	0.60983	0	0.53172	0.304782	0.653776	0
		0.646994	0.578408	0.471838	0	0	0.706681	0.519668	0.387578	0.612015	0.554928
		0.723449	0.529975	0.62719	0	0.613351	0.556729	0.64024	0.198318	0.700056	0.641095
		0.679934	0.509515	0.594723	0	0.59912	0.345353	0.531674	0.282185	0.800028	0.664994
		0.784569	0.292121	0.621933	0	0.600168	0	0.599262	0.250154	0.537944	0.469008
		0	0.318191	0.61374	0.585123	0.507962	0.527029	0.619812	0	0.599452	0.591376
		0.643478	0.640467	0.497809	0.516411	0.31792	0.462519	0.54486	0.17483	0.558605	0
		0.696065	0.515812	0.375626	0.534552	0.639259	0.436493	0.624216	0	0.590597	0.757133
		0.734996	0.523771	0.565834	0	0.521878	0.293274	0.653026	0.455103	0.645885	0.628101
		0.740886	0.722729	0.672082	0	0.173645	0.324704	0.671508	0.555814	0.629504	0.580318
		0.599109	0.682926	0.524542	0	0.529927	0.681184	0	0	0.581188	0.629442
		0.68176	0.652706	0.534389	0.40862	0.214888	0.596474	0.688919	0.434607	0.614401	0.561496
		0.748052	0.511334	0.514849	0.296815	0.718429	0.319879	0.543997	0	0.607453	0
		0.670524	0.349763	0.581596	0.420702	0.60045	0.4029	0.594301	0.198038	0.557293	0.523566
		0.837911	0.636242	0.53086	0	0.774206	0	0.713004	0.553951	0.643635	0.665471
		0.620085	0.651001	0.463249	0.436709	0.690397	0	0.565696	0	0.745806	0.737242
		0.609645	0.277843	0.585371	0.450189	0	0.39978	0.601841	0	0.596281	0.659044
		0.710921	0.633545	0.350494	0.478502	0.670371	0	0.614262	0	0.609773	0.596921
		0.722762	0.705193	0	0.543621	0.571206	0.389676	0	0.54776	0.613065	0.839873
		0.670655	0.382603	0.520531	0	0.868597	0.26346	0.581231	0	0.613557	0.504455
		0.676536	0.56312	0.563792	0.314807	0	0.467746	0.570357	0.236664	0.448952	0.705416
		0.620362	0.567693	0.619447	0.528705	0	0.486306	0.67487	0	0.60903	0.603466
		0.704807	0.666541	0.608078	0	0.528385	0.495594	0.535633	0	0.635221	0.609001
		0.306185	0.447709	0.568023	0.111092	0.164126	0.715802	0.474686	0.096656	0.665119	0.859848
		0.692941	0.491927	0.52008	0.221114	0.539986	0.577991	0.50662	0.170076	0.642416	0.579098
		0.704153	0.595336	0.545012	0	0.48561	0.318396	0.548437	0.664599	0.63827	0.490245
		0.658019	0.751351	0	0	0.353337	0.577995	0.31436	0.453306	0.757161	0.679816
		0.568231	0.436215	0.509696	0	0.743274	0.734908	0.535633	0.236151	0.613189	0.743728
		0.606174	0.455627	0.695812	0.567482	0.299823	0.346147	0.577647	0.283473	0.682798	0.67825
		0.701764	0.488438	0.525291	0.23329	0.409493	0.557604	0.672294	0.112991	0.588705	0.610958
		0.609974	0	0.528335	0	0.606229	0	0.619475	0.177454	0.649496	0.515395
		0.586892	0.423628	0.590931	0.568581	0.510621	0.566906	0.355175	0.601199	0.577686	0.64372
		0.766723	0.586128	0.245014	0	0.618121	0.668475	0.687668	0	0.615423	0.523719
		0.711678	0.555088	0.644927	0.231414	0.53338	0.399352	0.57974	0.471818	0.637437	0.484411
		0.68518	0	0.499235	0.683088	0.566884	0	0.650097	0.616921	0.734749	0.686295
		0.602082	0.820226	0.638188	0.415015	0.663083	0.485516	0.478327	0.274729	0.61004	0.595904
		0.466431	0.465322	0.604424	0.295573	0.486401	0.264736	0.548967	0	0.580766	0.560884
		0.646436	0.46038	0	0.452747	0.529361	0	0.621491	0.303543	0.684716	0
		0.683949	0.11298	0.590994	0	0.627824	0.579626	0.672864	0.462304	0.57553	0
		0.782207	0.641116	0.523995	0	0.708474	0.607973	0.546226	0.442939	0.568968	0.543163
		0.684797	0.564279	0.505273	0.65693	0.62566	0.461363	0.50178	0.576838	0.699261	0.55217
		0.601163	0.791223	0	0.416471	0.616771	0.206911	0.556871	0.486938	0.631932	0
		0.740722	0.39739	0.546251	0	0.577891	0.416136	0.439146	0.32042	0.609677	0.578848
		0.601249	0.545853	0.633056	0.535196	0.68487	0.70092	0.575306	0.567857	0.653691	0.557866
		0.597597	0.768228	0.626532	0.525798	0.504189	0.659099	0.254454	0.211881	0.559603	0.605464
		0.62598	0.562539	0.619314	0	0.636057	0.313832	0.541932	0.190745	0.634881	0.606987
		0.689818	0.623939	0.596217	0	0.477127	0.689928	0.420273	0	0.581554	0
		0.603855	0.633033	0.651317	0.332172	0.468155	0.613079	0.59715	0.107671	0.6327	0.599089
		0.611455	0	0.195152	0.564288	0.145212	0.489874	0.548347	0.477826	0.636971	0.775927
		0.65477	0.773966	0.597292	0.441045	0.674443	0	0.598595	0	0.593123	0.308996
		0.699338	0.578895	0.514114	0.317855	0.552973	0.513869	0.56116	0.368269	0.539474	0
		0.521673	0.583754	0.513585	0.302952	0	0.455239	0.694327	0	0.410412	0.59168
		0.830034	0.609779	0.593983	0.467494	0.55822	0.344064	0.250939	0.466282	0.578997	0.525785
		0.633556	0.500698	0.59498	0.660424	0.699487	0.664434	0.632884	0.333447	0.565387	0.593765
		0.79243	0.718432	0.572478	0.453335	0.632904	0	0.775144	0.320804	0.682355	0.622685
		0.602654	0.559616	0.560685	0.24735	0.671281	0.669362	0.614169	0.305165	0.694579	0.401737
		0.818663	0.457862	0.546613	0	0.53741	0.492632	0.590031	0.301267	0.628765	0.527446
		0.655784	0.38407	0.614727	0	0.679074	0.497852	0	0.368245	0.638335	0.521537
		0.783594	0.542121	0.577876	0.391645	0	0.47074	0.627353	0.378455	0.642876	0
		0.705526	0.498	0.324454	0.283196	0.679964	0.645238	0.554261	0.123578	0.764236	0.602684
		0.671345	0.552478	0.62462	0.500908	0.530929	0.436899	0.558443	0	0.612525	0
		0.614587	0.692357	0.60424	0.46667	0.578008	0.524201	0.565912	0	0.587288	1.15046
		0.695112	0.526749	0.488276	0.464497	0.651659	0.524938	0.592864	0.528027	0.622182	0.645685
		0	0.41606	0.62182	0.444626	0.377563	0	0.548141	0.539178	0.774927	0.60535
		0.491984	0.478312	0.534515	0	0.653866	0.418707	0.564209	0.504888	0.769432	0.599409
		0.664281	0.583903	0.553165	0.310276	0.320105	0	0.60298	0.404617	0.694946	0.525063
		0.655694	0.437173	0.68202	0	0.495467	0.596989	0.610005	0.380517	0.680755	0
		0	0	0.654998	0.475756	0.459906	0.736176	0.501411	0.530946	0.640904	0.3892
		0.602044	0.662954	0	0.471829	0.620665	0.452526	0.259371	0	0.751408	0.529682
		0.621058	0.639953	0.28099	0.355942	0.595194	0.386244	0.53967	0.357275	0.639136	0.636575
		0.734067	0.783984	0.564543	0.594742	0.42961	0.509235	0.595671	0.500539	0.730383	0.616406
		0.493331	0.592959	0.611852	0	0.744503	0.690884	0.639377	0.28049	0.62207	0.624579
		0.731757	0.578173	0.617785	0.538126	0	0.459135	0.61548	0	0.542975	0
		0.668124	0.637058	0.165754	0.25954	0.628689	0.523156	0.436502	0.254626	0.666635	0.668069
		0.59355	0.600503	0.570485	0.56328	0.605169	0.305749	0.580376	0.349897	0.627023	0.62895
		0.699517	0	0.52692	0	0.568262	0.508351	0.507623	0	0.646312	0.643859
		0.674026	0.636309	0.498836	0.469467	1.24915	0.666568	0.679493	0	0.577355	0
		0.525624	0.388676	0.549175	0.449614	0	0.705269	0.621477	0	0.64134	0.321928
		0.73071	0.675156	0.578642	0	0.636082	0.500276	0	0	0.720607	0.530992
		0.664758	0.488461	0.258867	0	0.322101	0.411628	0.654391	0.396525	0.577358	0.541362
		0.675988	0.704426	0.404838	0.408181	0.517238	0.468015	0.547712	0.488556	0.646101	0.561558
		0.630904	0.615866	0.275472	0.264515	0.681976	0.413442	0	0.41394	0.662604	0
		0.657972	0.56288	0.414695	0	0.613545	0.602266	0.602644	0.536157	0.613914	0.553237
		0.698403	0.71903	0.537911	0.386257	0	0.309487	0.603464	0	0.656395	0
		0.621529	0.697056	0.561418	0.253988	0.438541	0.534439	0.47154	0.503723	0.635687	0.478504
		0.667888	0.641394	0.508091	0	0.268509	0.661427	0.650725	0.563773	0.573829	0.56389
		0.738485	0.601551	0.487265	0.590155	0.696814	0.320403	0.560582	0.331477	0.632409	0.676646
		0.667496	0.550721	0.597076	0.530742	0.626455	0.485743	0.60468	0.432029	0.548112	0.620537
		0.646959	0.497966	0.503463	0.53229	0.570002	0	0.584577	0.301038	0.748472	0.602515
		0.610055	0.350314	0.22957	0.636651	0.335323	0.36639	0	0	0.678215	0.359552
		0.673193	0.526937	0.562327	0.195115	0.629088	0.432784	0.581827	0	0.599599	0
		0.603787	0.550233	0.610668	0	0.286525	0	0.522731	0	0.591436	0.731216
		0.547954	0.701758	0.658056	0.44037	0.627542	0.381488	0.569071	0	0.611973	0
		0.609432	0.787278	0.476937	0.407047	0	0.373917	0.46497	0	0.592066	0
		0.271002	0.72656	0.588327	0	0.649281	0	0.631528	0.330375	0.650507	0
		0.6245	0.671153	0.5878	0.595682	0.610696	0.182237	0.574091	0	0.669807	0.686909
		0.623169	0.573083	0.430706	0.574732	0.668074	0.483929	0.698563	0.360796	0.574206	0.240533
		0.336385	0.565967	0.600187	0	0.617724	0.5095	0.664337	0	0.650757	0
		0.705541	0.649619	0.582865	0.346425	0.438351	0.482613	0	0.525431	0.597189	0.745097
		0.706454	0.599234	0.588182	0.46517	0	0.453653	0.503589	0.223806	0.625906	0.526167
		0.624798	0.198165	0.690128	0	0.629604	0.419425	0.555816	0	0.557609	0.536052
		0.547152	0.618447	0.509517	0.518905	0.685139	0	0.55875	0.606401	0.672016	0.611301
		0.723268	0.481356	0.53489	0.38428	0.609195	0.448958	0.573364	0	0.665715	0.496083
		0.69178	0.737446	0.260228	0	0.621334	0	0.628127	0	0.584028	0.636275
		0.678805	0.631014	0.453989	0.373305	0.752691	0.342553	0.512673	0	0.499829	0.639164
		0.689662	0.375112	0.626161	0.396948	0.571929	0	0.603493	0	0.711609	0.247446
		0.671669	0.616778	0.428461	0.229817	0.677078	0.53841	0.64593	0	0.621531	0.220931
		0.581583	0.56883	0.447084	0	0.646272	0.431066	0.572492	0.102576	0.710276	0.673838
		0.662489	0.544966	0.463566	0.528415	0.435547	0.418612	0.579146	0	0.63355	0.600255
		0.685098	0	0.551661	0.398947	0.609912	0.529661	0.498507	0.506308	0.586153	0.537626
		0.645417	0.539326	0.480706	0.495037	0.654678	0.443998	0.58493	0	0.598683	0.583581
		0.674151	0.531563	0.53236	0.412253	0.633341	0.487089	0.602581	0	0.509526	0.28257
		0.8343	0.70104	0.541188	0.567859	0.201948	0.416924	0.41848	0	0.609744	0.423275
		0.684595	0.395846	0.631642	0.397613	0.579863	0.57701	0.58567	0.455177	0.699459	0.772751
		0.662018	0.357039	0.627514	0.459302	0.511172	0.595724	0.535887	0.570047	0.711683	0.65506
		0.609135	0.664297	0.571851	0.219624	0	0.368377	0.681908	0.305165	0.820089
		0.746989	0.726403	0.656085	0.578393	0.636858	0.628311	0.585358	0	0.54072
		0.609455	0.485461	0.439295	0	0.656366	0.446417	0.649244	0	0.705638
		0.704273	0.764262	0.53004	0.27424	0.431976	0.160393	0.448915	0	0.610695
		0.60407	0.721775	0.542744	0.499511	0.503661	0.734943	0.601544	0	0.597638
		0.615439	0.707133	0.557045	0.619811	0.600466	0.555905	0.536688	0	0.484755
		0.784322	0.634613	0.43422	0.280032	0.478953	0.685089	0.591579	0.069075	0.52662
		0.701962	0.511519	0.579062	0.47462	0.204336	0.557869	0.629843	0.144623	0.645711
		0.647633	0.522696	0.48362	0.553817	0.648522	0.550488	0.540396	0	0.567416
		0.659647	0.568879	0.504838	0	0.551517	0.409593	0.468365	0.526809	0.618963
		0.607342	0.608309	0.548614	0.311516	0.21308	0	0.655334	0	0.592744
		0.737519	0.616675	0.495265	0	0.382177	0.695912	0.625095	0.46363	0.520572
		0.635787	0.688974	0.583412	0.293421	0.533017	0.59828	0.476305	0.235284	0.578639
		0.609078	0.400739	0.591203	0.483084	0.552406	0.782969	0.721453	0	0.71819
		0.847031	0.527915	0.654387	0	0.497787	0	0.634342	0.131796	0.572807
		0.731073	0.644457	0.545377	0.315297	0.518557	0.441981	0.690392	0	0.367833
		0.635018	0.514136	0.616829	0.56187	0.477892	0	0.27829	0.511845	0.838624
		0.585345	0.705889	0.491957	0.564655	0.495224	0.307227	0.773188	0.546418	0.638527
		0.668057	0.660029	0.614583	0.428385	0.63827	0.320378	0.567254	0.555644	0.608724
		0.678083	0.701366	0.225644	0.295218	0.678369	0.399092	0.458369	0	0.690356
		0.801505	0.698966	0.545786	0.190517	0.325669	0.782583	0.620118	0.380234	0.648621
		0.73154	0.702945	0.547537	0	0.423301	0.518453	0.419745	0	0.600661
		0.604143	0.608684	0.425397	0.334384	0.350187	0.068063	0.544486	0.308825	0.671054
		0.746685	0.571038	0.658474	0.434469	0.658149	0.737817	0.647145	0.31547	0
		0	1.38179	0.510281	0.113204	0.463586	0.535141	0.554273	0	0.54769
		0.654619	0	0.576215	0.329928	0.679906	0	0.528698	0	0.628209
		0.634449	0.562134	0.508097	0.306381	0.595699	0	0.558866	0	0.626165
		0.736734	0.765092	0.646817	0	0	0.504167	0.609361	0.08602	0.738878
		0.645332	0.645343	0.532892	0	0.400619	0	0.572988	0	0.684551
		0.802223	0.363438	0.592003	0	0.705759	0.494279	0.588774	0	0.643903
		0.731707	0.558119	0.509726	0	0.601573	0	0.680785	0	0.612095
		0.707806	0.588918	0.593526	0.390094	0.475816	0.443876	0.586354	0.305092	0.606792
		0.083565	0.755798	0.494125	0.316363	0.265434	0	0.584661	0.459919	0.527616
		0.753101	0.628804	0.49067	0	0.570814	0.427937	0.496405	0.372329	0.67594
		0.657357	0.72007	0.643391	0.449267	0.684072	0.305798	0.492386	0.438302	0.583193
		0.465936	0.542037	0.532472	0.52714	0.465661	0.369549	0.498156	0.251832	0.684187
		0.708037	0	0.540445	0.549179	0.605603	0.449523	0.544117	0.511484	0.540055
		0.662803	0	0.553524	0	0.518298	0.458147	0.500164	0.584684	0.578011
		0.736208	0.60296	0.521383	0.559497	0.701805	0.583546	0.256253	0.573064	0.686303
		0.637192	0.712925	0.549892	0	0.619025	0.498083	0.606999	0	0
		0.750659	0.472443	0.723358	0.184984	0.590294	0.443663	0.539535	0.293515	0.586728
		0.760503	0.517071	0.594547	0.355249	0.640749	0.716946	0.603706	0.45531	0.73579
		0.724377	0.486748	0.561478	0.432867	0.624312	0.420163	0	0.524993	0.597209
		0.601556	0.57356	0.630462	0.453148	0.597776	0	0.492107	0	0.564626
		0.758995	0.676323	0.63632	0.517642	0.556942	0.752948	0.622394	0.381245	0.732724
		0.640813	0.601402	0.519579	0	0.603992	0.247923	0.559762	0.671748	0.708695
		0.646777	0.597637	0.591793	0	0.445087	0	0.706968	0	0.616443
		0.521828	0.50235	0	0	0.687727	0.250949	0.598503	0.114966	0.724103
		0.613424	0.532312	0.524161	0.521063	0.671946	0.39125	0.58868	0.359211	0.655913
		0.627099	0.309577	0.707999	0	0.677745	0.260283	0.600579	0.407772	0.785847
		0.590579	0.41395	0.628432	0.357914	0.701375	0.380957	0.544074	0.203733	0.578335
		0.673829	0.542884	0.272045	0	0.546416	0.619146	0.36118	0.278836	0.506053
		0.634884	0.652248	0.581592	0.391253	0.563344	0.661591	0.622991	0.450093	0.629192
		0.704276	0.653817	0.468955	0.500158	0.713167	0.311267	0.572468	0.20446	0.61586
		0.708674	0.910393	0.561126	0.493426	0.781519	0	0.577828	0.164877	0.624333
		0.688426	0.69159	0.712042	0.447375	0.232491	0.49989	0.655825	0	0.615325
		0.62264	0.730905	0.609977	0	0.741827	0.7355	0	0.445694	0.62303
		0.640866	0.539723	0.528429	0.665498	0.487002	0.429609	0.590273	0.418928	0.532698
		0.717511	0.569035	0.54434	0.444659	0.688334	0.336487	0.487925	0	0.668197
		0.630648	0.656206	0.560779	0.47461	0.5828	0.559477	0.614539	0	0.62206
		0.610419	0.510948	0.522111	0.334045	0.593122	0.741542	0.556649	0.071827	0.6153
		0.729365	0.584088	0.425073	0	0.39975	0.710342	0.59675	0.388047	0.55339
		0.60615	0.706412	0.540122	0.50629	0.532796	0.3393	0.695088	0.444425	0.556712
		0.63121	0.620877	0.515248	0	0.444418	0.328077	0.618291	0.319645	0.641585
		0	0.650626	0.580109	0	0.417652	0	0.635204	0.352761	0.661543
		0.611198	0.705667	0.579784	0	0.325088	0.330579	0.533966	0.297451	0.694553
		0.727034	0.552222	0.625885	0.420091	0.608696	0.576286	0.577688	0	0.618823
		0.674172	0.832272	0.6265	0.515451	0.57919	0.303456	0.551759	0	0.607647
		0.630543	0.48836	0.457718	0.369474	0.660172	0	0.435227	0.431888	0.635929
		0.674039	0.334134	0.612042	0.283485	0.722183	0.357895	0.624898	0	0.611735
		0.684982	0	0.512451	0	0.518368	0.468478	0.627401	0.181142	0.648668
		0.651989	0.692348	0.574959	0.523985	0.610495	0.379661	0.196269	0.285256	0.621241
		0.695872	0.624801	0.594929	0.232005	0.522504	0.465801	0.473274	0.550812	0.695693
		0.603989	0.585345	0.560419	0	0.415527	0.313478	0.571048	0.376865	0.614648
		0.663119	0.675362	0.566723	0.509806	0.378729	0.646295	0.666993	0.424715	0.628591
		0.843636	0.568119	0.636505	0	0.562927	0.62148	0.649439	0	0.666189
		0.686405	0.349441	0.602595	0.4704	0.801966	0.646859	0.483281	0.396084	0.686706
		0.206449	0.72868	0.581982	0.172059	0.613475	0.514538	0.501893	0.457403	0.681492
		0.680976	0	0	0.453767	0.643499	0.531155	0.539203	0	0.675165
		0.663744	0.573079	0.530613	0	0.689103	0	0.58426	0.552702	0.643297
		0.657349	0	0.537089	0.433208	0.630881	0.711893	0	0	0.754684
		0.695583	0.787623	0.652966	0.344924	0.587673	0.536447	0.505748	0.311303	0.597249
		0.645462	0.459125	0.351641	0.683968	0.550807	0.436251	0.358221	0	0.575365
		0.673835	0.489759	0.553591	0	0.338093	0.403235	0.647054	0.24179	0.576149
		0.427949	0.657864	0.484224	0.605609	0.145562	0.286753	0.553098	0.342547	0.682357
		0.626169	0.728599	0.396964	0.453214	0.522377	0	0.308705	0.337594	0.463237
		0.790567	0.649682	0.68186	0.375908	0.552509	0	0.548333	0.487646	0.555679
		0.473444	0.69184	0.521272	0.31277	0.267737	0.486214	0.512406	0.177387	0.587203
		0.76337	0.410822	0.538156	0.346287	0.484404	0.539332	0.292674	0	0.704716
		0.681635	0.337938	0.497787	0	0.586774	0.463051	0.607376	0.463309	0.625743
		0.726367	0.709575	0.457482	0.50039	0.438813	0.503681	0.636368	0	0.602345
		0.742422	0.44267	0.599559	0.354498	0.412775	0	0.48337	0	0.564955
		0.66826	0.678744	0.602083	0.531433	0.427925	0.355857	0.501117	0.296746	0.461631
		0.733706	0.480099	0.44081	0	0.682686	0.670787	0.54154	0	0.572415
		0.626973	0.553424	0.483598	0	0.635642	0	0.22868	0.390787	0.440525
		0.549453	0.566005	0.5236	0.491709	0.653263	0	0.601522	0.385318	0.610589
		0	0.599801	0.51966	0	0.61811	0.431893	0.573577	0.223122	0.632795
		0.926821	0	0.368868	0.438182	0.646127	0.215633	0.690001	0	0.606835
		0.601827	0.516069	0.425206	0.565418	0.730433	0.471315	0.578318	0	0.663237
		0.600712	0.581473	0.502539	0.248233	0.634849	0	0.485885	0.33157	0.677832
		1.04092	0.624463	0.516092	0	0.355862	0.411974	0.5402	0	0.668989
		0.707791	0.716264	0.522176	0.316626	0.581771	0.596275	0.60783	0	0.607618
		0.678223	0.718143	0.688857	0.490677	0.649473	0	0.132492	0.239014	0.680773
		0.626509	0.81449	0.471088	0	0.566523	0.441875	0.552994	0	0.736323
		0.666756	0.500082	0.470681	0.370418	0.514471	0.216786	0.578893	0	0.598315
		0.688549	0.64086	0.556695	0.346983	0.556269	0.097128	0.310178	0	0.690606
		0.736714	0.527339	0.56416	0.602671	0.773872	0.59146	0.578255	0.393318	0.644133
		0.633285	0.429722	0.528863	0.371075	0.445276	0.457728	0.571082	0.552111	0.653752
		0.684037	0.751751	0.501754	0.549724	0.60491	0.511564	0.598721	0.322188	0.764305
		0.725079	0.438311	0.445964	0.569803	0.685327	0.487937	0.324137	0.543082	0.588857
		0.587186	0.276633	0.521848	0	0.719399	0.715725	0.249359	0	0.671171
		0.655403	0.673063	0.424344	0.623465	0.63461	0	0.656151	0.392351	0.657753
		0.652543	0.715194	0.553616	0.203956	0.759766	0.589197	0.561195	0.432396	0.759489
		0.649204	0.629202	0.679489	0.185643	0.450355	0	0.692786	0	0.628557
		0.705566	0.654291	0.618677	0.488781	0.644593	0.40028	0.54378	0.440278	0.622458
		0.696592	0.527953	0.527524	0.172665	0.646524	0.605849	0.573232	0	0.557549
		0.721735	0.481356	0.62377	0.532174	0.653421	0	0.607508	0.387343	0.584487
		0.815326	0.677397	0	0.388455	0.586119	0.536631	0.61961	0	0.744447
		0.688542	0.483668	0.466318	0.527842	0.769877	0.539728	0	0.440982	0.536955
		0.683049	0.551637	0.49379	0.332565	0.551324	0.390716	0.69353	0.368689	0
		0.676834	0.61079	0.653692	0.389456	0.611254	0.521083	0.613963	0.414557	0.597774
		0.703759	0.462921	0.507256	0.393062	0.383456	0.500965	0.301626	0	0.807759
		0.730589	0.511911	0.577556	0.598664	0.451286	0	0.493874	0	0.738344
		0.599121	0.627784	0.708009	0.160137	0.306436	0.547852	0.743044	0.273415	0.690606
		0.60765	0	0.601096	0.418704	0.617142	0.567473	0.646733	0.316827	0.629485
		0.672651	0.510821	0.525486	0.527761	0.860502	0.243837	0.697784	0	0.57981
		0.68348	0.573212	0.576636	0	0.650344	0.676944	0.544572	0.523153	0.67206
		0.83788	0.575157	0.562501	0	0.544869	0.519684	0.567278	0.302943	0.638621
		0.69922	0.569217	0.538985	0	0.679162	0.427139	0.680024	0	0.667671
		0.710948	0	0.313146	0	0.573658	0.588685	0	0.454004	0.638674
		0.328156	0	0.683633	0.538621	0.590845	0.613594	0.545071	0.476019	0.618783
		0.539711	0.471011	0.617273	0.541084	0.569581	0	0.663351	0	0.56697
		0.687895	0.644127	0.713706	0.174693	0.576354	0.459428	0.327489	0.405973	0.331537
		0.68486	0.604368	0.553711	0	0.705939	0.404513	0.616062	0.370554	0.746896
		0.573118	0.651435	0.552467	0	0.289431	0.484481	0.655859	0.454263	0.593203
		0.638343	0.676803	0.455935	0	0.597989	0.636553	0.619047	0.235783	0.580899
		0.731576	0.426509	0.519166	0.52821	0.671345	0.621105	0.329339	0	0.644125
		0.725046	0.585848	0.467387	0.09126	0	0.480323	0.753319	0	0.821165
		0.649285	0.548503	0.61352	0	0.351547	0.592243	0.544268	0.241304	0.684971
		0.687744	0.154983	0.310128	0.431537	0.644668	0.411516	0.566946	0.436186	0.614318
		0.738677	0.406829	0.561678	0	0.581537	0.166735	0.592371	0.528845	0.64575
		0.564468	0.762157	0.55695	0.31213	0.462997	0.300098	0.445995	0.562104	0.536638
		0.507071	0.573782	0.388231	0.543151	0.646394	0.450382	0.640314	0.461807	0.640039
		0.64814	0.579518	0.539453	0.558149	0.314679	0.498462	0.628969	0	0.633518
		0.606733	0.535445	0.65775	0	0.492511	0.388341	0.619195	0	0.510015
		0.597056	0.302816	0.545958	0.443691	0.719872	0	0.589579	0	0.508574
		0.687835	0.361144	0.599663	0.02078	0.573682	0	0.629514	0.526058	0.611367
		0.667434	0.592385	0.528789	0.649648	0.661785	0.432614	0.404264	0.432439	0.630442
		0.512344	0.557102	0.467781	0	0.721235	0.418459	0.583036	0.390958	0.690959
		0.614574	0.650383	0.605376	0.239403	0.654095	0.412153	0.615152	0.401405	0.704007
		0.578701	0.606172	0.601223	0.656697	0.627281	0.676777	0.668101	0.504457	0.685336
		0.650394	0.599249	0.619629	0	0.584459	0	0.564801	0	0.65046
		0.576747	0	0.554977	0	0.680291	0.686852	0.344576	0	0.456629
		0.618666	0.621342	0	0.571853	0.592447	0.547275	0	0	0.579318
		0.641143	0.810151	0.408466	0.394924	0.537329	0.282154	0.616233	0.486672	0.549243
		0.430348	0.655583	0.661709	0.417829	0.201339	0.550953	0.530759	0.453796	0.664407
		0.724327	0.596169	0.625344	0.454857	0	0	0.642598	0.063096	0.675977
		0.713999	0.561956	0.534072	0	0.563606	0.315352	0.666633	0.254522	0.717725
		0.288774	0.682114	0.618006	0.371139	0.638358	0.263756	0.419946	0.394181	0.661338
		0.671736	0.566601	0.544224	0.414038	0.610768	0.427204	0.53535	0	0.652642
		0.656294	0	0.653878	0.548809	0.574678	0.42666	0.525607	0.357837	0.664365
		0.77967	0.526596	0.530521	0	0.694794	0.307938	0.571227	0.448864	0.405144
		0.6732	0.43419	0.629497	0	0.495152	0.793294	0	0	0.654017
		0.645171	0.359182	0.581002	0	0.778687	0.717868	0.503629	0.354318	0.660457
		0.671649	0.443666	0.636442	0.647171	0.491547	0.454953	0.578425	0.516539	0.607092
		0.663506	0.244406	0.567692	0	0.637241	0.685229	0.547842	0.319184	0.680277
		0.668395	0.405168	0.616199	0.740201	0.627977	0	0.632312	0.492398	0.535221
		0.709824	0	0.53242	0.499968	0.360612	0.487975	0.506635	0.448521	0.61002
		0.634043	0.448396	0.54609	0.465825	0.690153	0.389254	0.198654	0.442398	0.67693
		0.588403	0.546065	0.443306	0.534683	0.573544	0.569208	0.637227	0.376881	0.698613
		0.691691	0.690969	0.649635	0	0.536596	0.296399	0.566777	0.52086	0.534823
		0.679553	0.67296	0.571628	0.495562	0.655256	0	0.23907	0.452588	0.614013
		0.920869	0.330985	0.456351	0.349589	0.562208	0.690214	0.632729	0.585998	0.726527
		0.662151	0.465093	0.548394	0.453747	0.76692	0.574711	0.608479	0.270747	0.730924
		0.745822	0.659373	0.556773	0.42784	0.510428	0.608934	0.602372	0.476697	0.525244
		0.719829	0.916428	0.510518	0	0.352015	0.414015	0.468215	0.467562	0.574809
		0.565967	0.658296	0.577413	0	0.659169	0.407346	0.517189	0.437589	0.619132
		0.575248	0.781726	0.565783	0	0.592117	0.600638	0.619872	0.335341	0.695746
		0.630257	0	0.527583	0.491146	0.657659	0.596191	0.557209	0.162545	0.66979
		0.638645	0.620106	0.428377	0.385358	0.171758	0.486604	0.530193	0.344927	0.757686
		0.686727	0.17792	0.568856	0.669987	0	0.308224	0.552801	0	0.656782
		0.650132	0.906746	0.500417	0	0.627434	0.684296	0.601414	0.27789	0.597109
		0.593804	0.466557	0.632476	0.468845	0.348927	0.574777	0.467169	0	0.699493
		1.00218	0.615766	0.502893	0	0.752297	0.222994	0.541977	0.689459	0.641138
		0.589832	0.386468	0.551475	0.453962	0.725219	0.363796	0.463776	0	0.587672
		0.437552	0.443725	0.559331	0.52244	0	0.471106	0.588708	0.463623	0.644025
		0.625107	0.479977	0.168058	0.366271	0.51366	0.288517	0	0.39801	0.733527
		0.699066	0.522668	0.561635	0.357993	0.246785	0.515645	0.583321	0	0.587582
		0.671634	0.656442	0.512512	0.709046	0.664673	0.343798	0.629111	0.442531	0.712374
		0.830943	0.460404	0.428343	0.314331	0.627573	0.468235	0.567262	0.332026	0.685161
		0.588986	0.683575	0.520853	0	0.682554	0.372218	0.52785	0	0.673435
		0.652215	0.436889	0.525399	0.319838	0.614609	0.309835	0.473897	0	0.628737
		0.659896	0.189159	0.581879	0	0.80733	0	0.542589	0	0.598771
		0.808662	0.4556	0.67884	0.441014	0.402919	0.357746	0.541592	0	0.740021
		0.653851	0.511395	0.498501	0	0.673951	0.548139	0.51275	0.597634	0.644011
		0.657205	0.442076	0.523524	0.475853	0.638894	0.444249	0.612838	0.55021	0.602043
		0.697212	0.441741	0	0.218402	0.593351	0.480661	0.276125	0	0.624208
		0.729981	0.531007	0.502013	0	0.517146	0.489418	0.298181	0.385743	0.673256
		0.710685	0.362213	0.521404	0.466301	0.641938	0.575851	0.549249	0	0.626939
		0.733728	0.558336	0.462065	0	0.590442	0.615338	0.506015	0	0.7139
		0.709254	0.678613	0.595556	0.514634	0.640913	0.656181	0.707824	0.41599	0.539321
		0.629289	0.940595	0.57619	0.55989	0.45614	0.283549	0.41513	0.201494	0.618027
		0.703494	0.788201	0.433701	0	0.745402	0.653315	0.664803	0.337551	0.608851
		0.63429	0.492252	0.637382	0.3682	0.546455	0	0.540873	0	0.506915
		0.623398	0.428305	0	0.578834	0.686478	0.446299	0.558494	0.501555	0.627531
		0.732316	0.55868	0.673397	0	0.278613	0.475023	0.486974	0	0.591743
		0.746488	0	0.605061	0.53938	0.642791	0.492205	0.453019	0.308568	0.464058
		0.6226	0.577982	0.568513	0	0.208453	0	0.455941	0.364979	0.663669
		0.662039	0.416981	0.61241	0.273294	0.649379	0.44982	0.460543	0	0.559715
		0.669791	0.680998	0.562703	0.839111	0.430756	0.585312	0.646255	0.210157	0.73579
		0.740843	0.538056	0.529085	0.299927	0.562944	0.341317	0.560481	0	0.593756
		0.733782	0.328025	0.57179	0	0.63506	0.493914	0.571541	0	0.723367
		0.648234	0.604431	0.516344	0	0.529761	0.588434	0.646688	0	0.627868
		0.465574	0.627243	0.578946	0.284524	0.469635	0	0.475675	0.41351	0.752644
		0.624212	0.551517	0.536931	0.632671	0.638852	0.761327	0.644142	0	0.647423
		0.647165	0.560372	0.595511	0	0.43413	0.55877	0.51168	0	0.419357
		0.696868	0.662505	0.708956	0	0.49848	0.446567	0.257019	0.544344	0.540015
		0.675349	0.418707	0.61912	0.570167	0.504847	0	0.222412	0.347066	0.67294
		0.630006	0.64493	0.580201	0	0.608195	0.454186	0.630502	0	0.672806
		0.602235	0.547999	0.577665	0.471416	0.650688	0.536594	0.67343	0	0.663301
		0.777602	0.745089	0.545015	0.51693	0.630467	0.399253	0.590418	0.426846	0.623346
		0.659581	0.521867	0.550247	0.614316	0.568379	0.161594	0.581455	0.488085	0.638763
		0.630513	0.623297	0.611226	0.208063	0.578628	0.722445	0.625231	0	0.620018
		0.605353	0.635203	0.621661	0.387533	0.407667	0.198903	0.433134	0.341818	0.616817
		0.721866	0.671112	0.428592	0.356123	0.662063	0.313055	0.614492	0.282666	0.613392
		0.581222	0.381728	0.63105	0.422849	0.577184	0.396608	0.591754	0	0.572646
		0.569995	0.651877	0.549956	0	0.445972	0.373191	0.44388	0.288522	0.59561
		0.61331	0.608205	0.460956	0.411111	0.633293	0.576547	0.577894	0.220406	0.720982
		0.739308	0.481428	0.57618	0	0.691344	0.205729	0.456175	0.441754	0.649176
		0.623467	0.420126	0.578744	0.566374	0.262533	0.673082	0.515832	0.497783	0.606107
		0.652357	0.707493	0.550172	0	0.349043	0.234474	0.525679	0	0.636442
		0.715286	0.738852	0.17918	0	0.378847	0.452433	0.649362	0.468661	0.630038
		0.683931	0.406499	0.542691	0.276156	0.546889	0.244387	0.427367	0.515766	0.58393
		0.616834	0.518219	0.644327	0.340026	0.381564	0.374259	0	0.047534	0.709272
		0	0.604603	0.476629	0.37966	0.73667	0.515936	0.468619	0	0.585234
		0.601401	0.529651	0.201016	0.496043	0.285638	0.540524	0.604771	0.417327	0.594574
		0.685047	0.766782	0.614595	0.492213	0.775373	0.195378	0.747024	0.257048	0.634985
		0.484402	0.457737	0.295161	0	0.754291	0.685969	0.440289	0.39757	1.1155
		0.73061	0.56967	0.45492	0.279561	0.468198	0	0.628652	0	0.501468
		0.502968	0.630488	0.659412	0.438581	0	0.493524	0.45537	0.181032	0.480683
		0.603756	0.761379	0.622733	0.236844	0.513071	0.444694	0.361173	0.184999	0.618621
		0.67149	0.630692	0.487621	0	0.618119	0.435665	0.561282	0.380982	0.639362
		0.730755	0.617884	0.558616	0	0	0.318316	0.45846	0.261474	0.638913
		0.653738	0.643632	0.563698	0	0.647662	0.350203	0	0.497118	0.718937
		0.736465	0.649337	0.619553	0.504502	0.693953	0.342276	0.399525	0.403537	0.637719
		0.5114	0.555316	0.65084	0	0.615397	0.337418	0.546891	0	0.660087
		0.639651	0.4919	0.565098	0	0.294517	0.411258	0.599879	0.451109	0.733219
		0.639992	0.712823	0.475929	0	0.428083	0.507028	0.580179	0	0.645938
		0.647867	0	0.528298	0.348542	0.580378	0	0.533756	0	0.426626
		0.687534	0.583189	0.550686	0	0.726709	0.455246	0.476325	0.239519	0.749601
		0.590453	0.624985	0.600802	0.376376	0.525362	0.148292	0.544978	0.25774	0.605025
		0.767646	0.645812	0.71309	0.482874	0.381916	0.3096	0.594532	0.112097	0.548104
		0.703737	0.800851	0.545866	0.572393	0.705641	0.6539	0.667091	0	0.666646
		0.658133	0.222482	0.655621	0	0.548429	0	0.650712	0.232821	0.591903
		0.675132	0.548561	0.620154	0.427739	0.542499	0	0.694708	0.301541	0.680621
		0.438807	0.506797	0.5572	0	0.791565	0.396708	0.544776	0.621618	0.51704
		0.690556	0.635395	0.609318	0.53772	0.466483	0.494952	0.562618	0.513894	0.634192
		0.780551	0.534836	0.59167	0.56945	0.623069	0.6243	0.639836	0	0.462898
		0.653498	0.437666	0.501846	0.346211	0.673558	0.257217	0	0	0.663188
		0.679388	0.721452	0.456136	0.38118	0.423003	0.273819	0.619894	0.406222	0.651481
		0.707832	0.583866	0.622338	0.311312	0.71738	0.309227	0.641701	0.278861	0.606205
		0.623573	0	0.518602	0.61416	0.585548	0.346862	0.66409	0.139356	0.578387
		0.510165	0.597811	0	0.414334	0.517637	0.350057	0.493261	0	0.614798
		0.588705	0.772572	0.475553	0	0.713409	0.268806	0.657497	0.450937	0.589087
		0.702594	0.848255	0.610635	0.551604	0.561458	0.380111	0.629142	0.263328	0.725704
		0.635521	0.598649	0.540417	0.429118	0.717602	0.426262	0.524205	0.466846	0.589161
		0.727703	0.350221	0.669103	0.535916	0.644565	0.378516	0.611707	0	0.717462
		0.720633	0.631989	0	0.165455	0.539981	0.511438	0.646842	0.283862	0.674804
		0.730664	0	0.591313	0	0.599788	0.517401	0.607814	0.234764	0.566165
		0.672484	0	0.586328	0.633157	0.595659	0.27263	0.634269	0.460169	0.603237
		0.627088	0.6298	0.613613	0	0.502311	0.703289	0.560064	0	0.414666
		0.668038	0.596989	0.49164	0.5232	0	0.223729	0.590427	0.602486	0.653757
		0.479277	0.467307	0.493227	0.302898	0.557471	0.173326	0.400325	0	0.656907
		0.602095	0.413225	0.582056	0	0.55603	0.783814	0.591065	0.266314	0.717804
		0.637287	0.78316	0.525994	0.282446	0.288525	0.591965	0.412563	0	0.611609
		0.661523	0.874452	0.612407	0	0.327341	0.318082	0.581119	0	0.660216
		0.732438	0.593893	0.620038	0.29811	0	0.630894	0.597667	0	0.568269
		0.649687	0.484932	0.436356	0.47541	0.532482	0.345435	0.559491	0.179896	0.610729
		0.701711	0.698226	0.67524	0.56233	0.410261	0	0.36406	0.568689	0.620028
		0.723016	0.690392	0.526342	0	0.578254	0.282668	0.633893	0	0.62065
		0.67455	0.484526	0.561901	0.387024	0.535502	0.359935	0.270893	0	0.730078
		0.59623	0.57906	0.379565	0	0.503381	0.556278	0.623514	0.287255	0.743831
		0.621424	0.62986	0.526094	0.490455	0.34221	0.542373	0.542168	0	0.719768
		0.683856	0.718697	0.621595	0	0.697075	0.399667	0.440228	0.583174	0.689081
		0.617282	0.682577	0.652586	0	0.625624	0.486231	0.47143	0.354791	0.613638
		0.724486	0.535838	0.597015	0	0.773838	0	0.31951	0.36786	0.638811
		0.661441	0.619057	0.491938	0.277448	0.498314	0.660425	0	0.205585	0.59572
		0.672716	0.903151	0.575196	0.479665	0.707224	0.428187	0.541115	0.288039	0.499596
		0.590563	0.628272	0.571591	0.227083	0.247898	0.498725	0.582009	0	0.697352
		0.504304	0.719649	0.610775	0	0.368758	0.612331	0.587975	0	0.594038
		0.666812	0.535807	0.551306	0	0.709856	0	0.589545	0.398443	0.528699
		0.815615	0.664648	0.415729	0.400785	0.66865	0.452237	0.399261	0	0.575406
		0.684412	0.653071	0.55749	0	0.645794	0.235465	0.585444	0	0.538324
		0.670858	0.5382	0.522426	0.497393	0.636263	0.479757	0.556832	0	0.565126
		0.83619	0.455883	0.531898	0	0.344768	0.573019	0.610471	0	0.661132
		0.639498	0	0.525831	0.528543	0.254052	0.524231	0.519156	0	0.856146
		0.576574	0.64934	0.563967	0.124702	0.476334	0.703873	0.514761	0	0.597545
		0.828791	0.353995	0.58663	0	0.651694	0.666358	0.551203	0.394002	0.651006
		0.620579	0.614912	0.573896	0.420713	0.63541	0.546191	0.465196	0	0.597954
		0.656504	0.603908	0.537923	0	0.605066	0.316434	0.483564	0	0.557381
		0.636425	0.426603	0	0.097984	0.498191	0	0.558296	0.225327	0.591913
		0.678838	0.607749	0.655233	0.313532	0.57588	0.587803	0.571683	0.249775	0.582224
		0.515112	0.735844	0.64457	0.511899	0.539869	0.654372	0.675059	0	0.679201
		0.671588	0.384975	0.627686	0.342655	0.694384	0.277364	0.454425	0.328174	0.707802
		0.760395	0.47739	0.611945	0	0.563419	0.486532	0.599354	0.299352	0.548255
		0.586087	0.702658	0.461928	0	0.612229	0	0	0.33895	0.636722
		0.716326	0.650765	0.542134	0.441565	0.611492	0.505377	0.61131	0.22957	0.596172
		0	0.134914	0.598584	0.383031	0.684061	0.458674	0	0	0.715401
		0.768908	0.546577	0.650814	0.424162	0.528055	0.457329	0.394008	0.516144	0.324676
		0.561834	0.674716	0.660047	0	0.43979	0.550677	0.562475	0.558655	0.687085
		0.663973	0.658762	0.614916	0.335338	0.617526	0.364677	0.567571	0.205837	0.507523
		0.625189	0.252953	0.520381	0	0.45491	0.291607	0.621596	0	0.647299
		0.788391	0.578381	0.534255	0.563135	0.709075	0	0.389953	0	0.612009
		0.775303	0.874146	0.632514	0.26374	0.451912	0.307604	0.598941	0.440969	0.6572
		0.620558	0.519361	0.68613	0.392002	0.692643	0.508643	0.579423	0
		0.661121	0.584801	0.561906	0	0.373975	0	0.517431	0
		0.757892	0.50736	0.561585	0.52807	0.671318	0.164645	0.542583	0
		0.662515	0.622868	0.539227	0	0.503289	0.46911	0.582471	0.313923
		0.624386	0.645827	0.505963	0.349959	0	0.290286	0.199898	0.307011
		0.739507	0.625586	0.469392	0.539958	0.684858	0	0.610738	0
		0.616	0.29207	0.480051	0.529196	0.450708	0.359748	0.529264	0.058588
		0.739885	0.575402	0.630666	0.371782	0.70335	0	0.437447	0.332409
		0.66221	0.392613	0.61765	0.259395	0	0.496662	0.651068	0.304406
		0.584618	0.637853	0.605031	0	0.464739	0	0.611325	0.238775
		0.490686	0.730631	0.455114	0.487235	0.594335	0	0.061141	0.10222
		0.661226	0.722972	0.545246	0.469738	0.297154	0	0.528411	0.441223
		0.705974	0.615449	0.47945	0.521522	0.647953	0.425118	0.535467	0.500049
		0.689902	0.71479	0.513517	0.344602	0.596736	0.529914	0.666172	0.191397
		0.678043	0.574431	0.626685	0.600306	0.564923	0.353989	0.715142	0.340534
		0.693369	0.60488	0.601583	0.309236	0.728815	0.489707	0.467352	0.348693
		0.72928	0.46454	0.479525	0	0.684653	0.663262	0.527121	0.314441
		0.683316	0.571906	0.565297	0.694224	0.451999	0.337825	0	0
		0.788714	0.70507	0.585992	0	0.446351	0.449087	0.572749	0.257985
		0.699485	0.644683	0.488363	0.137567	0.656859	0.340959	0.600241	0.362546
		0.657077	0	0.263771	0.570868	0.617119	0.367046	0.589831	0
		0.612546	0.484445	0.476383	0	0.62335	0.350543	0.618743	0.239483
		0.505773	0.540194	0	0.317647	0.54498	0	0.572786	0.531615
		0.80804	0.663728	0.474058	0.557189	0.108193	0.742864	0.60817	0
		0.662223	0.498235	0.589944	0.475497	0	0.408399	0.623091	0.407383
		0.660629	0.569808	0.578537	0.266539	0.669466	0.359154	0.443978	0
		0.756731	0.608731	0.526644	0.420485	0.306558	0	0.580269	0.235263
		0.681496	0.642167	0.591138	0.355006	0.557889	0.625444	0.5583	0.221475
		0.590308	0.310144	0.607003	0.495707	0.638805	0.576801	0.604446	0.200052
		0.790244	0.606759	0.581289	0	0.633551	0.601702	0.528407	0
		0.649886	0.573742	0.425817	0.274122	0.663094	0	0.497178	0.268422
		0.628912	0.715775	0.472809	0	0.742759	0	0.528225	0
		0.582752	0.607576	0.279693	0	0	0.224824	0	0
		0.672363	0.715877	0	0	0.774158	0.484934	0.599276	0.464085
		0.702212	0.2905	0.504232	0	0.592519	0.537794	0	0.359315
		0.706784	0.295293	0.513418	0	0.624533	0.381725	0	0
		0.623253	0.658646	0.550231	0	0.554891	0	0.515767	0
		0.683171	0.660653	0.698456	0.602629	0.677971	0.48484	0.698305	0.345592
		0.476685	0.612293	0.269951	0.462722	0	0.416659	0.459345	0
		0.666223	0.705832	0.537407	0.60475	0.686458	0.25697	0.632099	0.12515
		0.600237	0.512703	0.501904	0.532933	0	0.650414	0.585075	0
		0.63658	0.401552	0.406068	0.430757	0.596447	0.379429	0.537329	0.400103
		0.671181	0.374049	0.518562	0.233434	0.561131	0.571796	0.494391	0
		0.672514	0.789876	0.547695	0.448588	0.570286	0	0	0
		0.679905	0.655922	0.597199	0	0.68229	0.145045	0.519689	0.356103
		0.329374	0.637472	0.601442	0.508017	0.579717	0.544028	0.594222	0
		0.690679	0.586765	0.610084	0	0.556453	0.60679	0.573285	0
		0.667503	0.512844	0.492104	0.513607	0.561341	0.533826	0.513005	0
		0.701812	0.683371	0.600415	0	0.638799	0.251517	0.530097	0.320068
		0.655344	0.683616	0.593094	0	0	0.347961	0.510237	0.317092
		0.653323	0.643944	0.676489	0.454284	0.478946	0.433203	0.691955	0.347514
		0.657223	0	0.591141	0	0.514234	0	0.560755	0.295037
		0.711714	0.603891	0.590494	0.353964	0.586573	0.531269	0.546893	0.464806
		0.521119	0.541688	0.516476	0	0.687682	0	0.594529	0
		0.662095	0.537667	0.594491	0.189611	0.766505	0.542988	0.243762	0
		0.644855	0.359745	0.50634	0.553287	0.537626	0.382643	0.539689	0
		0.503963	0.458871	0.534494	0.425169	0.437454	0.533433	0.609162	0.318968
		0.636802	0.582169	0.44784	0	0.380538	0.495227	0.546559	0.434324
		0.620852	0.304659	0.503991	0	0.563396	0.782774	0.627926	0.164364
		0.712588	0.591977	0.473035	0.250054	0.558103	0.338117	0	0
		0	0.711649	0.61637	0.390372	0.598113	0.20789	0.680344	0.210382
		0.890198	0.605889	0.240507	0.3021	0.724938	0	0.532909	0
		0.560523	0.582034	0.588811	0.191847	0.479481	0.707097	0.654428	0.483301
		0.409985	0.470251	0.55841	0.530297	0.508517	0.464918	0.518963	0.391273
		0.480061	0.703289	0.584826	0.461818	0.541665	0.068151	0.489572	0
		0.705481	0.640626	0.515553	0.180819	0.597518	0.441416	0.581177	0
		0.679611	0.399703	0.659569	0.430896	0.695729	0.526759	0.416574	0.46826
		0.676814	0.523811	0.597623	0.267489	0.44346	0.199363	0.571996	0.331637
		0.706727	0.226238	0.550529	0.16214	0	0.513266	0.605425	0
		0.680883	0.47483	0.514255	0.409813	0.485773	0.366185	0.507685	0.34703
		0.417111	0.907784	0.559131	0.537932	0.524993	0.486618	0.585306	0.462902
		0.605378	0.580957	0.55137	0.086028	0.64493	0	0.71973	0.598181
		0.711688	0.586795	0.637576	0.544725	0.52061	0.396834	0.645451	0.394533
		0.68436	0.360204	0.557764	0.250179	0.403385	0.483244	0.562388	0.469601
		0.67821	0	0.543014	0.392863	0	0	0.59286	0.482157
		0.646161	0.556457	0.559821	0.388099	0.524742	0	0.539907	0.495978
		0.63842	0.644409	0.524843	0.485521	0.594861	0.45025	0.176752	0.391996
		0.702797	0.678791	0.61199	0.540096	0.552588	0.454677	0.597861	0.343766
		0.707588	0.399711	0.681706	0.465711	0.371043	0.533665	0.605346	0.389091
		0.583246	0.859825	0.604804	0.627079	0.692939	0.352506	0.502269	0.481857
		0.712065	0.686969	0.607843	0.509666	0.572367	0.719623	0.536014	0.148676
		0.673365	0.665133	0.528048	0	0.648678	0.656445	0.604647	0
		0.545609	0.296436	0.559961	0.610127	0.190074	0.271056	0.601566	0.42875
		0.645608	0.451577	0.570109	0.476602	0.509785	0.409832	0.580573	0
		0.666469	0.77448	0.339443	0.498978	0.50649	0.440585	0.588026	0
		0.649731	0	0.606929	0	0.499526	0.478089	0.464246	0
		0.643098	0.616383	0.557306	0	0.383222	0	0.651036	0
		0.635156	0.616134	0.607524	0.564133	0.533107	0.478148	0.672628	0.222101
		0.592325	0.754401	0.491805	0.464484	0.718859	0.344684	0.544559	0
		0.6895	0.561247	0.572343	0.493582	0.685286	0.558329	0.268069	0.081161
		0.441126	0.794105	0.654199	0	0.603554	0.675936	0.575716	0
		0.738231	0	0.502887	0	0.437051	0.206869	0.581072	0
		0.714189	0.556418	0.488196	0.53017	0.615045	0.607223	0.626174	0.222232
		0.654223	0.156364	0.548329	0	0.346624	0.431725	0	0.475713
		0.690333	0.54382	0.600828	0.506903	0.722781	0.688812	0.602234	0
		0.593353	0.359608	0.599199	0.294534	0.67153	0.385262	0.480501	0.175587
		0.711147	0.725577	0.488134	0.435362	0.193475	0.484805	0.69578	0.285503
		0.709387	0.743641	0	0	0.425023	0.478344	0.503924	0.462064
		0.637633	0.657913	0.525592	0.232778	0.435913	0	0.592354	0.33813
		0.655117	0.678172	0.507671	0.466955	0.571897	0.571028	0.457937	0.22851
		0.667173	1.21248	0.549547	0.54568	0	0.664346	0.748638	0
		0.636199	0.408921	0.578555	0.348455	0.514634	0.511717	0.519846	0
		0.52532	0.647256	0.622687	0.359494	0.635578	0.195934	0.53237	0
		0.673067	0.563103	0.545165	0.389141	0.557809	0.283792	0.308681	0.23941
		0.625712	0.606233	0.674334	0	0.54938	0.184518	0.578996	0.220982
		0.591817	0.592871	0.686957	0.385649	0.759192	0.618285	0.512819	0.396226
		0.588122	0.662672	0.493641	0	0.588962	0.470564	0.549238	0
		0.771114	0.922768	0.4899	0.200187	0.530134	0.425884	0.677889	0
		0.630844	0.642752	0.47873	0	0.778233	0.49273	0.644946	0.193926
		0.640964	0.251207	0.541871	0.43369	0.738934	0.445834	0.517202	0.392322
		0.649559	0.57927	0.54883	0.55691	0.363171	0.468724	0.481642	0
		0.64418	0.716763	0.483384	0.375786	0.708776	0.566061	0.579723	0.360639
		0.577295	0.573679	0.530242	0.500217	0.63204	0.32141	0.524565	0.307612
		0.691788	0.346018	0.537096	0	0.79038	0.546716	0.476596	0
		0.555724	0.604006	0.544096	0	0.605872	0.450128	0.592711	0
		0.533144	0.338609	0.600931	0.404146	0.498134	0	0.439844	0.663079
		0.642145	0.598882	0.550869	0	0.607035	0	0.439102	0
		0.693506	0.483648	0.65387	0.515633	0.683796	0	0.533336	0.202327
		0.670849	0.727049	0.467792	0	0.709962	0.099943	0.603839	0
		0.689901	0	0.273298	0.275004	0.519609	0.574597	0.611229	0
		0.546984	0.709992	0.546711	0.390055	0.592247	0	0.524916	0.158271
		0.692201	0.620947	0.496966	0.464998	0.764858	0	0.462573	0.319365
		0.852141	0.614955	0.528095	0.582619	0.371834	0.501529	0.645613	0.230813
		0.875608	0.430101	0.515098	0.477112	0.670673	0.230472	0.56685	0.261871
		0.725932	0.648177	0.478839	0.414518	0.303516	0.418096	0.507563	0.413663
		0.648162	0.462067	0.500284	0.501328	0.604785	0	0.488336	0
		0.669618	0.530196	0.436228	0.152047	0.719488	0.176545	0.643404	0.483168
		0.635588	0.485102	0.666819	0.241859	0.659165	0.628988	0.622559	0.224705
		0.679926	0.455905	0.611384	0	0.46962	0.496704	0.520629	0.569757
		0.602851	0.542394	0.561337	0.331491	0.479777	0.533378	0.526577	0.232545
		0.670158	0.63071	0.571894	0.352795	0.67641	0.571736	0.094571	0
		0.69129	0.496696	0.590664	0.317496	0.709047	0.227959	0.64473	0.401147
		0.548833	0.783082	0.525101	0.370893	0.720227	0.291811	0.626201	0.388476
		0.660687	0.505834	0.52933	0	0	0.34877	0.470982	0
		0.624302	0.575061	0.45467	0	0.56236	0.462419	0.659965	0
		0.620201	0.728071	0.425589	0.309215	0.49952	0	0.590579	0
		0.669256	0.472066	0.658156	0.529173	0.587492	0	0.566535	0.395103
		0.698744	0.731049	0.495452	0.559471	0.33604	0.385703	0	0
		0.579715	0.535775	0.569251	0.197189	0.453943	0	0.487514	0.336233
		0.463948	0.598376	0.568098	0.673895	0.543196	0.428202	0	0
		0.757725	0	0.486177	0.57416	0.556096	0.7809	0	0.425929
		0.620606	0.514159	0	0.409202	0.478028	0.483429	0	0
		0.545748	0.351891	0.592682	0	0	0.298882	0	0
		0.603978	0.595555	0.568142	0.588414	0	0.316446	0.579488	0
		0.584571	0.619195	0.544483	0	0.662812	0.208148	0.647143	0
		0.667685	0.762224	0.504534	0.464123	0.468887	0.647951	0.503248	0.554507
		0.686832	0.397535	0.583935	0	0.485488	0.254275	0.606487	0
		0.690767	0.52191	0.563088	0.339287	0.42391	0.384883	0.598905
		0.637339	0.538697	0.477515	0.067657	0.653711	0.273193	0.304898
		0.72654	0.590502	0.527218	0.288239	0.638615	0.465306	0.47038
		0.687295	0.713474	0.563899	0.183865	0.80014	0.146613	0
		0.709893	0.122043	0.36228	0	0.399397	0.447722	0.449147
		0.562836	0.550987	0.582548	0	0.486095	0.537653	0.544987
		0.654843	0.718692	0.676307	0	0.392211	0	0.600758
		0.571681	0.31957	0.560879	0.366273	0.603106	0.481429	0.566176
		0.582466	0.61476	0.590808	0.287349	0.557032	0.282758	0.60543
		0.681049	0.643214	0.634377	0.614877	0.496501	0.516839	0.485523
		0.648548	0.508548	0.694208	0.241576	0.569101	0.587028	0.571131
		0.415379	0	0.52574	0.321015	0.749209	0.729882	0.59481
		0.688604	0	0.413235	0.440828	0.685281	0.363884	0.587698
		0.615742	0.675267	0.561854	0	0.533243	0.416359	0.538634
		0.694938	0.629218	0.511855	0.503329	0	0.206057	0.391951
		0.687917	0.663141	0.451248	0	0.584915	0.370001	0.633295
		0.620101	0.749197	0.477685	0.582233	0.44483	0	0.582439
		0.605415	0.47843	0.589796	0	0.719234	0.527899	0.594187
		0.729044	0.638598	0.554453	0	0.519119	0.714168	0.560771
		0.664792	0.575419	0.53226	0	0.352714	0.748373	0.415041
		0.704217	0.412145	0.423777	0.4083	0.609427	0.432205	0.284333
		0.601037	0.686241	0.526129	0.562915	0.301266	0.540001	0.554092
		0.449614	0.509662	0.525377	0.435545	0.469463	0.258183	0.562884
		0.837615	0.619089	0	0.288587	0.538976	0.430532	0.563446
		0.648398	0.630784	0.580271	0.178417	0.560629	0.362742	0.625412
		0.515886	0.399676	0.48274	0.328739	0.375226	0.155093	0.490004
		0.300376	0.78616	0.557615	0.213121	0.590458	0.203037	0.65124
		0.731418	0.577196	0.600408	0.247052	0.816728	0.656456	0.641516
		0.636743	0.856923	0.676145	0	0.53682	0.528922	0.448203
		0.622406	0.557997	0.552229	0.511515	0.703408	0.382844	0.517647
		0.234425	0.524522	0.544646	0.417475	0.663202	0.361918	0.567988
		0.531426	0.388049	0.582617	0.262618	0.357084	0.337672	0.481817
		0.409033	0.519218	0.58337	0.522853	0.646109	0.468887	0.481088
		0.542959	0.608475	0.56877	0.498858	0.501317	0.415937	0.40424
		0.708206	0.675655	0.607079	0.368365	0.482933	0.708971	0.546069
		0.634271	0.767997	0.587555	0	0.617667	0.229896	0.345408
		0.663051	0.581637	0.613669	0.445337	0.45273	0.545249	0.577209
		0.684072	0.613716	0.610217	0	0.279503	0.555869	0.459906
		0.707688	0.730557	0.595946	0.426407	0.480063	0	0.264941
		0.654149	0.676034	0.560869	0	0.680117	0.319518	0.609613
		0.611988	0.704438	0.593597	0.276372	0.608511	0.32628	0.386278
		0.6038	0.564554	0.578045	0.542594	0.640975	0	0
		0.681412	0.543465	0.444248	0.370588	0.600415	0.457778	0
		0.18723	0.281251	0.468126	0.397586	0.561651	0.347139	0.261083
		0.746673	0.736663	0.55637	0.38907	0.56628	0.438055	0.525315
		0.69263	0.619182	0.573732	0.267863	0.433222	0.418104	0.534121
		0.540525	0.572269	0	0	0.515571	0.334437	0.346889
		0.670514	0.348324	0.60317	0.364508	0.430242	0.502796	0.452884
		0.609569	0.594288	0.468168	0	0.639858	0.513718	0.664087
		0.804376	0.59928	0.474073	0.278525	0.555713	0.425197	0.247069
		0.608529	0.309292	0.629945	0.415691	0.699758	0	0.609099
		0.670723	0.583538	0.608541	0.482311	0.591407	0.599999	0.70848
		0.627635	0.611266	0.54938	0	0.549638	0.566706	0.467592
		0.600084	0.708649	0.463409	0	0.639436	0.575455	0.533742
		0.488285	0.458184	0.60402	0	0.647358	0.465003	0
		0.626363	0.671322	0.496248	0	0.589335	0	0.606138
		0.515879	0.411813	0.490664	0	0.490168	0	0
		0.605171	0.584932	0.562396	0	0.633294	0.570342	0.421708
		0.628058	0.628094	0	0	0.674005	0.429887	0.371096
		0.611187	0.620906	0.300064	0.386133	0	0.597384	0.631176
		0.645248	0.558259	0.614316	0	0.647626	0	0.624708
		0.528288	0.593085	0.553043	0.502086	0.566059	0	0.593599
		0.716158	0	0.613723	0.619601	0.637416	0.390412	0
		0.599913	0.512239	0.608761	0	0.319772	0	0.715871
		0.643772	0.679427	0.587013	0	0.712524	0.462574	0.56228
		0.42538	0.664939	0.63554	0.462396	0.681824	0.407827	0.490912
		0.667464	0.316356	0.562381	0.264558	0	0	0.554327
		0.68655	0.641914	0.266544	0	0.583553	0.722504	0.552512
		0.651248	0.66527	0.410209	0.582751	0.589396	0.512743	0.598182
		0.61044	0.554363	0.646484	0	0.576472	0.315466	0.346935
		0.61652	0.51414	0.642532	0	0.502846	0.456153	0.403983
		0.535812	0.548485	0.611819	0	0.685684	0.427712	0.506697
		0.662838	0.583723	0.620828	0.63727	0.65512	0.666194	0.443668
		0.696828	0.872799	0.289857	0	0.480988	0.268626	0.556098
		0.712746	0.64874	0.620079	0.465383	0.58429	0.411548	0.56623
		0.743252	0.580215	0.6117	0	0.668611	0.523294	0.578636
		0.620531	0.475478	0	0.446277	0.594488	0.795148	0
		0.728099	0.701844	0.587424	0	0.665245	0.416236	0.556211
		0.664887	0.49349	0.658213	0	0.541264	0.520412	0.538748
		0.780065	0.621583	0.595369	0.340448	0.680329	0.397497	0.557617
		0.706749	0.774475	0.60936	0.303784	0.690153	0.299852	0.508299
		0.684348	0.378057	0.472215	0	0.645197	0.46668	0.474131
		0.678408	0.624119	0.59873	0	0.473021	0	0.731106
		0.678126	0.207545	0.496672	0	0.547115	0.489449	0.605481
		0.675235	0.683073	0	0.462166	0.403435	0.214897	0.530177
		0.632505	0.576244	0.519582	0	0.629755	0.351252	0
		0.663213	0.638283	0	0.427703	0.44989	0.436076	0.233614
		0.626275	0.554614	0.543697	0.625948	0.670394	0.500187	0.538765
		0.618397	0.510325	0.584869	0	0.575315	0.495434	0
		0.63457	0.490518	0.55608	0.229249	0.316684	0.295118	0.635221
		0.041286	0.711836	0.637021	0.506231	0.627431	0.548531	0.517467
		0.615528	0.600944	0.532534	0.375137	0.361049	0.474075	0.561548
		0.662151	0.343417	0.581292	0	0.306258	0	0.559619
		0.27036	0.2502	0.512305	0.578723	0.683786	0.475427	0.374105
		0.722039	0.51923	0.792903	0.410277	0.738254	0.745391	0.597229
		0.620073	0.772833	0.597026	0.423712	0	0.585788	0.671354
		0.64451	0.52715	0.55925	0	0.479769	0.503441	0.547156
		0.683909	0.299695	0.523145	0.309416	0.649481	0.481466	0.478623
		0.691055	0.753025	0.554662	0	0.434864	0.534699	0.610553
		0.616964	0.51284	0.684993	0	0.642692	0	0.604937
		0.662136	0.368826	0.508918	0.386072	0	0.148033	0.400507
		0.668836	0.581561	0.582423	0	0.573724	0.351071	0.615907
		0.666991	0.562658	0.567333	0.179831	0	0.53234	0.535314
		0.689488	0.571598	0.59225	0.419606	0.429778	0	0.627271
		0.665237	0.670953	0.625966	0.557673	0.652852	0.568233	0.279655
		0.459906	0.576762	0.565608	0.435838	0.714499	0	0.603121
		0.678222	0.597536	0.601832	0.464798	0.650366	0.549185	0
		0.616728	0.320998	0.674162	0.331453	0.644072	0.398302	0.588292
		0.70655	0.567856	0.603404	0.511211	0.63608	0.545811	0.515998
		0.697601	0.429798	0.624813	0	0.755392	0	0.398407
		0.674293	0.651588	0.524612	0	0.656483	0	0.576671
		0.311875	0.276913	0.577291	0.380044	0.683936	0.788004	0
		0.682939	0.617529	0.552689	0	0.138625	0.520993	0.538735
		0.694489	0.686271	0.577944	0.518239	0.514627	0.385199	0.616997
		0.682669	0.243955	0.632028	0.083062	0.763273	0.17911	0.526268
		0.732483	0.627765	0.542733	0	0.524798	0.348379	0.355389
		0.592101	0.320572	0.595546	0	0.52682	0.40927	0.576832
		0	0.549975	0.519174	0	0.391996	0.251076	0.560681
		0.647473	0.709746	0.593271	0.374743	0	0.317916	0.466301
		0	0.560295	0.475875	0	0.686235	0	0.553537
		0.662444	0.671098	0.616626	0	0.575342	0.581896	0.569257
		0.633301	0.468249	0.581232	0.420688	0.614855	0	0.506788
		0.670532	0.37923	0.397132	0	0.671245	0.434578	0.5083
		0.700481	0.496549	0.570531	0	0.565002	0.464285	0.514494
		0.660798	0.588037	0.614181	0.311776	0	0	0.501559
		0.681444	0.748802	0.442886	0.367079	0.597211	0.396873	0.493254
		0.719708	0.529901	0.44892	0	0.41484	0.481644	0
		0.683437	0.558502	0.684831	0.486369	0.233615	0.5323	0.558494
		0.744777	0.559344	0.67538	0.429863	0.447071	0	0.406938
		0.619968	0.424987	0.542237	0	0.526469	0	0.54389
		0.683809	0.506501	0.675627	0	0.685498	0.570966	0.599914
		0.643783	0.589903	0.529647	0	0.707899	0.577625	0.586018
		0.620715	0.704729	0.60002	0.328212	0.61912	0.514196	0.418717
		0.736274	0	0.585544	0	0.634512	0.425312	0
		0.583244	0.606933	0.534679	0	0.569137	0.450922	0.556462
		0.654604	0.528322	0.58151	0	0.593152	0.511813	0.569421
		0.517226	0.4719	0.584981	0.14228	0.475145	0.347747	0.496625
		0.644264	0.644083	0.599	0	0.650261	0.235118	0
		0.475367	0.971124	0.608435	0.377497	0.279418	0.475495	0.509363
		0.644164	0.732524	0.63383	0	0.529651	0.370686	0.426942
		0.461622	0.579164	0.655133	0.422846	0.581454	0.402466	0.49514
		0.238896	0.64121	0.572859	0.349762	0.713878	0.416789	0
		0.604694	0.652469	0.544803	0.225554	0.624225	0.387167	0.608294
		0.668862	0.384321	0.509559	0.528794	0	0.118526	0.674088
		0.491492	0.589728	0.581146	0.334336	0.655325	0.624484	0
		0.593479	0.396975	0.551878	0	0.374595	0.369051	0.529679
		0.716794	0.776717	0.64919	0.451157	0.646925	0.662019	0.387787
		0.732715	0.371112	0.593705	0.41793	0.681813	0.506143	0.592706
		0.677343	0.294943	0.598679	0.523577	0.542356	0.383985	0.586011
		0.652026	0.722091	0.585871	0.568797	0.63448	0.338473	0.624215
		0.831916	0.68994	0.618821	0	0.553605	0.341495	0.369184
		0.63836	0.433932	0.605454	0.079104	0.603724	0.441846	0.51152
		0.642789	0.419733	0.572973	0.178543	0.526478	0	0.613211
		0.725175	0.266722	0.35916	0	0.370915	0.716423	0.453868
		0.661821	0.349305	0.639482	0	0	0	0
		0.620909	0.384107	0.535238	0.659848	0.374124	0.385016	0.486666
		0.64407	0.565736	0.635333	0.516334	0.647772	0.571642	0.462921
		0.727713	0.425206	0.534354	0	0.563864	0	0.604051
		0.568642	0.44858	0.58223	0.569454	0.793152	0.210606
		0.678004	0.559789	0.601465	0.399362	0.684548	0.538759
		0.728336	0.531468	0	0.27741	0.68127	0.593547
		0	0.681985	0.511348	0.415447	0.653816	0
		0.59883	0.365259	0.556024	0	0.396067	0.312458
		0.65632	0.608515	0.689556	0.316416	0.595782	0
		0	0	0.562064	0.485821	0.695806	0
		0.699367	0.451426	0	0	0.405924	0.393774
		0.667441	0.728886	0.470473	0.477902	0.539872	0.612904
		0.609059	0.773898	0.57103	0.442893	0.483209	0.611647
		0.450845	0.50676	0.562889	0.554202	0.605359	0.37494
		0.691895	0.537696	0	0.530884	0.480897	0
		0.566725	0.705169	0.472473	0.437849	0.275634	0.304346
		0.681076	0.634795	0.603735	0.504019	0.431571	0.311578
		0	0.75445	0.660404	0.287184	0.493688	0.348561
		0.639965	0.498394	0.526414	0.334581	0.608355	0.364381
		0.670786	0.656137	0.439632	0.620878	0.566655	0
		0.70434	0.553328	0.445319	0	0.730135	0.406944
		0.740737	0.434885	0.525844	0	0.329996	0.54116
		0.249287	0.385003	0.328581	0.224806	0.141739	0.712463
		0.68712	0.251139	0.525037	0	0.62999	0.328781
		0.690824	0.400443	0.541995	0	0	0.581069
		0	0.556698	0.572661	0.403837	0.566489	0.304077
		0.632506	0.49119	0	0.245118	0.625739	0
		0.733881	0.623493	0.623675	0	0.234651	0.498696
		0.638273	0.428909	0.636581	0.147257	0.652527	0.303291
		0.754782	0.609784	0.609426	0.403997	0.472817	0.383112
		0.627195	0.480681	0.396706	0	0.562167	0.561768
		0.46418	0.181037	0.438554	0.439332	0.655545	0.05271
		0.687099	0.65326	0.490198	0	0.571672	0.207976
		0.537115	0.845984	0.542672	0.261923	0.463889	0.436183
		0.664509	0.49559	0.513232	0	0.616369	0.322195
		0.655327	0.625783	0.390784	0.149493	0.420885	0.441969
		0.622179	0.542668	0.546191	0	0	0.584513
		0.572971	0.318524	0.630584	0.238639	0	0.234462
		0.683799	0.253276	0.458504	0	0.733227	0
		0.59818	0.217065	0.4999	0.169391	0.649436	0.395815
		0.647917	0.740771	0.439831	0.599221	0.513232	0
		0.61278	0.816392	0.700523	0	0.495465	0.692624
		0.605405	0.553949	0.353464	0.524535	0.44268	0.331332
		0.744909	0.581157	0.635202	0.275282	0.434779	0.589799
		0.651106	0.559986	0.516947	0.457491	0.661612	0.328419
		0.630656	0.468357	0.483866	0	0.769546	0
		0.703696	0.606266	0.601625	0.237176	0.411851	0.58235
		0.632011	0.554999	0.597461	0	0.621169	0.561438
		0.602113	0.300281	0.357917	0.320542	0.532017	0.659088
		0.714613	0.572904	0.587806	0.496242	0.595033	0.243964
		0.645786	0.242617	0.315052	0.533351	0.544771	0
		0.692421	0.499154	0.537284	0.343717	0.549252	0.425788
		0.739211	0.771244	0.633664	0.193485	0.407136	0.389615
		0.690227	0.460368	0.539152	0.303818	0.440344	0.183953
		0.585815	0.561517	0.514467	0.162664	0.66583	0
		0.765618	0.243331	0.649498	0.141571	0.706118	0.499936
		0.544337	0.660184	0.394541	0.416336	0.634068	0.410697
		0.688965	0.388341	0.545347	0	0.720592	0
		0.643429	0.655905	0.551438	0.456663	0.692119	0.335921
		0.52065	0.568674	0.385415	0.431242	0.562396	0.431066
		0.566595	0.465781	0.585246	0.567835	0.538719	0.628116
		0.617875	0.668306	0.562865	0.36599	0.340627	0.274638
		0.60298	0.753297	0.565201	0.453443	0.628045	0.32335
		0.476218	0.512085	0.559229	0.485837	0	0.51085
		0.704701	0.130899	0.542614	0.31572	0.140707	0
		0.67112	0.619616	0	0.54562	0.566106	0.365292
		0.720304	0.542595	0.60222	0	0.284381	0
		0.671174	0.451577	0.485565	0	0.633068	0.525719
		0.421237	0.534961	0.484055	0.352402	0.646859	0
		0	0.672718	0.465095	0.573246	0.662759	0.404684
		0.664	0.367572	0.490874	0.383789	0	0.432851
		0.606538	0.418246	0.579625	0.406569	0.159153	0.646801
		0.62589	0.678981	0.505372	0	0	0.636355
		0.68873	0.603196	0.607522	0.31916	0.662971	0.607745
		0.691848	0.601373	0.596455	0.572854	0.12522	0.424325
		0.699804	0.629477	0.5494	0.433965	0.665082	0.545972
		0.764933	0.680025	0.389712	0.306307	0	0.380613
		0.5654	0.597608	0.597173	0.55364	0	0.431347
		0.590367	0.619247	0.481317	0	0.55748	0.389564
		0.692941	0.628293	0	0.58182	0.624066	0.382686
		0.666813	0.245042	0.63488	0	0.494584	0.593498
		0.629253	0.532942	0.52887	0.190988	0.461363	0.4583
		0.692829	0	0.66106	0.386479	0.525992	0
		0.750508	0.675727	0.613188	0	0.688127	0.453868
		0.710203	0.582705	0.510378	0	0.312665	0.483828
		0.681428	0.537681	0.615568	0.209728	0.6665	0.476783
		0.722897	0.688595	0.53302	0.248681	0.643518	0
		0.690891	0.810203	0.226272	0.293788	0	0.550153
		0.638127	0.483567	0.548353	0	0	0.262981
		0.665651	0.536758	0.603869	0.226499	0.58101	0.547182
		0.643923	0.641002	0.434088	0.415264	0.492424	0.266676
		0.851428	0.535445	0.636825	0.354007	0	0.393062
		0.459989	0.641379	0.540577	0	0.479234	0.100992
		0.672733	0.40107	0.525814	0.429131	0.837996	0
		0.727485	0.637449	0.51878	0	0.512032	0.500345
		0	0.264289	0.381365	0.421207	0.641481	0.315978
		0.523191	0.681432	0.544299	0.554598	0.589739	0.36665
		0.710107	0.541213	0.48599	0	0.65567	0.682669
		0	0.447531	0.635464	0	0.470463	0
		0.629535	0.65104	0.536124	0	0	0.534334
		0.66897	0.626247	0.612782	0.465367	0.537828	0.446116
		0.654549	0.635377	0.633545	0.396137	0.164349	0.408841
		0.489831	0.246586	0.566868	0	0.547386	0.336476
		0.677715	0.68125	0.649777	0.291581	0.769537	0.445415
		0.72451	0.53765	0.525514	0.494625	0.526911	0.411742
		0.656601	0.623856	0.540036	0.44198	0.321381	0.51533
		0.680987	0.584747	0.54887	0.469082	0.651159	0.197432
		0.592364	0	0.508067	0	0.523006	0.363602
		0.711649	0.514934	0.543601	0	0.535853	0.215897
		0.56304	0.270963	0	0	0.569841	0.439527
		0.566764	0.078942	0.410802	0.509635	0.612802	0.47034
		0	0.629761	0.131199	0	0.678755	0.395345
		0.661807	0.532608	0.613669	0.402183	0.669917	0.623028
		0.800751	0.527049	0.499238	0.24151	0.58244	0.556759
		0.675467	0.467713	0.59417	0.451829	0.441258	0
		0.846465	0.487092	0.53739	0	0.58489	0.382194
		0.677975	0.614961	0.608433	0	0.364842	0.377993
		0.655161	0.638154	0.590824	0	0.614894	0
		0.67194	0.599104	0.65057	0.277095	0.637984	0
		0.590165	0.64432	0.42207	0.256148	0.502178	0.417517
		0.683205	0.585562	0	0	0.369165	0.309953
		0.628831	0.519468	0.240837	0	0.660822	0.525316
		0.711212	0.466164	0.467764	0.131183	0.65359	0
		0.700738	0.519414	0.675542	0	0.687101	0
		0.356863	0.388767	0.526938	0.510056	0.338007	0.512692
		0.356145	0.607601	0.59155	0.567197	0.586411	0.372664
		0.581439	0.558477	0.512953	0.363971	0.622555	0.400254
		0.664392	0.638585	0.589477	0	0	0.501781
		0.632854	0.450602	0.335433	0.442911	0.585989	0.386532
		0.626847	0.619862	0.593623	0.431653	0.628983	0.414756
		0.598378	0.719149	0.50185	0.440821	0.458002	0
		0.725486	0.417209	0.602681	0.551674	0.260077	0.247152
		0.649394	0.601644	0.493958	0.399097	0.624919	0.459949
		0.617325	0.488825	0.530261	0	0.260607	0.219354
		0.664316	0.627218	0.518146	0.316561	0.547746	0.478958
		0.634426	0.610948	0.651868	0	0.412021	0
		0.640648	0.37052	0.574788	0.350883	0.334981	0.531814
		0	0.542069	0.662288	0.188965	0.57138	0.298033
		0.634867	0.746715	0.594073	0	0.656638	0.357814
		0.639658	0.631101	0.575372	0	0.398837	0.262079
		0.601222	0.577975	0.53785	0	0.51034	0.348421
		0.237725	0.662401	0.457229	0.217404	0.623135	0.454204
		0.690963	0.507804	0.516246	0.582651	0.623473	0.290787
		0.633259	0.59443	0.577134	0	0.732876	0.570244
		0.701439	0.784598	0.624459	0	0.34754	0.535291
		0.61311	0.566323	0.276279	0.536239	0	0.388705
		0.774306	0.252281	0.447547	0	0.631502	0.359023
		0.695406	0.374622	0.545045	0.428275	0.558244	0.309161
		0.674472	0.480231	0.730394	0	0.509595	0
		0.650007	0.579376	0.491096	0.417143	0.436423	0.360977
		0	0.462279	0.550626	0	0.644369	0
		0	0.518582	0.542248	0.273793	0.615549	0
		0.765249	0.516434	0.656691	0.243054	0.580989	0.59206
		0.568571	0.501794	0	0	0.689818	0.302376
		0.619711	0.676724	0.425301	0.436569	0.676357	0.298828
		0.72561	0.644001	0.5706	0	0	0.305551
		0.665343	0.563631	0.50212	0.358116	0.513062	0
		0.665462	0.531047	0.346616	0.599478	0.64544	0.417855
		0.803602	0.641481	0.552644	0.255639	0.545002	0.35217
		0.536415	0.65881	0.609488	0	0.324562	0
		0.706966	0.573049	0.612808	0	0.600709	0
		0.591264	0.58721	0.477641	0.399318	0.250847	0.433309
		0.669287	0.53852	0.563974	0	0.628216	0.240039
		0.633715	0.666542	0.533885	0.179323	0.684342	0.474684
		0.671651	0.886344	0.708412	0.741908	0.455382	0.569978
		0.73225	0.54835	0.552997	0.49237	0.817652	0
		0.640631	0.225762	0.677725	0	0.683035	0.480292
		0.871953	0.590114	0.516661	0.497916	0.520734	0.215482
		0.696698	0.671254	0.57305	0.504892	0.401626	0.311544
		0.685505	0.620409	0.481956	0.50929	0.486036	0.454186
		0.67891	0.564501	0.588792	0	0.612659	0
		0.689266	0.545465	0.56082	0.496085	0.584459	0.225713
		0.564382	0.664359	0.425741	0.333213	0	0.364879
		0.657756	0.655769	0	0	0.655442	0.497899
		0.687836	0.910859	0.52182	0.504484	0.818502	0.510127
		0.674593	0.437623	0.517214	0.57847	0.738983	0
		0.627379	0.493227	0.400964	0.348845	0.567992	0
		0.563425	0.326289	0.520113	0.148348	0.737419	0.445123
		0.651738	0.385335	0.474665	0	0.527962	0
		0.658237	0.665684	0.53922	0.415422	0	0.336753
		0.735593	0.2926	0.68167	0.285664	0	0.468506
		0	0.488779	0.622458	0.465048	0.588802	0.338841
		0.74202	0.374173	0.57095	0.262753	0.351081	0.368748
		0.758265	0.708519	0.466377	0.402146	0.595843	0.508421
		0.652684	0.576742	0.52313	0.438407	0	0.428535
		0.734766	0	0.511655	0.349396	0.343642	0.403052
		0.744241	0.569938	0.444086	0.5452	0.662561	0.62063
		0.665155	0.410733	0.50727	0	0.573627	0.544676
		0.630222	0.252702	0.503301	0.47746	0	0.599298
		0.765074	0.524907	0.577832	0	0.718569	0.342311
		0	0.554537	0.523081	0.16704	0.60383	0
		0.614139	0.528934	0.564217	0	0.646584	0.52424
		0.934582	0.451523	0.588714	0	0.176414	0.252669
		0.64762	0.671062	0.546297	0	0.570587	0.402556
		0.677749	0.285681	0.596159	0.356754	0.561708	0
		0.706228	0.411154	0.458145	0	0.603881	0.31246
		0.333867	0.596741	0.307416	0	0.724732	0.475097
		0.556461	0.56242	0.600437	0.14198	0.582063	0.402181
		0.429491	0.461139	0.545233	0	0.470973	0.417061
		0.654414	0.716105	0.545592	0.549226	0.623973	0.374613
		0.655918	0.639374	0.65379	0	0.638736	0.316628
		0.702396	0.409051	0.513085	0	0.620692	0
		0	0.710281	0.548968	0.549367	0.08029	0.308745
		0.692517	0.677287	0.511846	0.44464	0.332285	0.299469
		0.595587	0.43812	0.495124	0.41514	0.571645	0.163351
		0.582332	0.778733	0.688083	0.618868	0.465849	0.506335
		0.565956	0.668917	0.514899	0.466267	0.334514	0.462991
		0.790378	0.50506	0.58663	0	0.596497	0.407164
		0.657127	0.656828	0.368549	0.332364	0.703518	0
		0.625288	0.517972	0.503311	0.488555	0.496562	0.464402
		0	0.307023	0.52132	0	0.626396	0.297778
		0.670338	0.251368	0.529187	0.377248	0.410482	0.505804
		0	0	0.550472	0	0.639408	0
		0.791808	0.552701	0.544369	0.387183	0.430905	0.438549
		0.575198	0.592693	0.647198	0.389333	0	0.622529
		0.714806	0.456969	0.595313	0	0.601803	0.688906
		0.692448	0.707536	0.49017	0.603724	0.32213	0
		0.653663	0.577972	0.553174	0.283508	0.627851	0.452985
		0.651442	0.576183	0.58605	0.169649	0.529745	0
		0.609939	0.436684	0.641497	0	0.236825	0
		0.71842	0.560855	0.55405	0.182791	0	0
		0.603834	0.825065	0.557538	0	0.637776	0.688207
		0.274869	0.650725	0.486164	0.330576	0.685175	0.316139
		0.689386	0.560809	0.617859	0.371891	0.714995	0.554356
		0.694892	0.396647	0.472641	0.475483	0.634291	0.54558
		0.69938	0.431051	0.483458	0	0.333799	0.457614
		0.623543	0.445937	0.422399	0	0.505179	0.306399
		0.666335	0.498411	0.403341	0.284474	0.642951	0.462889
		0.774546	0.349421	0.607313	0.484839	0.560055	0.538577
		0.658878	0.516941	0.263716	0.516545	0.43409	0.920969
		0.62848	0.497758	0.563684	0	0.572747	0.348059
		0.680536	0.586178	0.462714	0.535538	0	0
		0.645981	0.812957	0.589053	0.38106	0.542792	0.265478
		0.615145	0.526673	0.667228	0.351374	0.708786	0.304249
		0.673344	0.328593	0.551924	0.275108	0.626872	0.478
		0.593126	0.677974	0.52928	0.391232	0.580257	0.246312
		0.670064	0.613647	0.56485	0.363558	0.651833	0.472976
		0.763838	0.241437	0.555327	0	0.674406	0.5946
		0.825844	0.565507	0.575637	0.373037	0.530571	0.123865
		0.657941	0.420391	0.594553	0	0.171894	0.512112
		0.640696	0.338692	0.619586	0	0.555144	0
		0.664943	0.284709	0.548496	0.309196	0.513816	0.324709
		0.535022	0.64137	0.575293	0.390882	0.603678	0.648125
		0.719898	0.464615	0.50979	0.353765	0.562489	0.20017
		0.332734	0.285582	0.595166	0	0.709728	0.305433
		0.710775	0.568653	0.659517	0.49793	0.639105	0.220657
		0.499839	0.584459	0.614605	0.500409	0.376009	0.316297
		0.653566	0.490174	0.541515	0	0.680572	0
		0.629175	0.574758	0.597367	0	0.63951	0
		0.698121	0.589437	0.583385	0.404373	0.574433	0.324919
		0.663945	0.234634	0	0.442412	0.294235	0.469019
		0.596656	0.591238	0.548647	0.599826	0.58289	0.365173
		0.456361	0.430637	0.39276	0.417852	0.452407	0.45565
		0.679794	0.509347	0.454263	0	0.554555	0.237047
		0.655654	0.611171	0.600587	0	0.686781	0.434107
		0.775407	0.560223	0.579488	0.138044	0.581552	0.370149
		0.711837	0.582288	0.485409	0	0.54449	0.066021
		0.638696	0.594643	0.524163	0	0.612902	0.482059
		0.696875	0.668658	0.517146	0.382948	0.691813	0
		0.621861	0.606792	0.415315	0	0.345133	0
		0.65767	0.488207	0.591943	0.460115	0.614318	0.60461
		0.615502	0.447418	0.520471	0.522131	0.579503	0.445634
		0.351108	0.394442	0.530619	0	0	0.485334
		0.700011	0.747222	0.591005	0	0.609181	0.640841
		0.630158	0.698251	0.472999	0.177763	0.599868	0.229215
		0.794844	0.530093	0.568971	0	0.684882	0.407553
		0.627019	0.551169	0.535983	0	0.267045	0
		0.639104	0.621772	0.583009	0	0.742873	0.293067
		0.653493	0.561032	0.422269	0.239178	0.616502	0.261357
		0.697046	0.681022	0.493212	0.544318	0.713429	0
		0.409682	0.668464	0.324498	0.519434	0.68553	0
		0	0.457017	0.439087	0.483985	0.617748	0
		0.634242	0.274416	0.563954	0.474114	0.446094	0.501917
		0.71302	0.553547	0.562756	0.363224	0.548038	0
		0.621103	0.54212	0.587822	0.545825	0.559396	0.405189
		0.689053	0.597382	0.670448	0	0.481999	0
		0.687727	0.405071	0.596005	0.082755	0.278823	0.507318
		0.770041	0.519871	0.569128	0.533911	0.430554	0.277249
		0.766411	0.653359	0.366537	0.353329	0.736839	0.464413
		0.717443	0.449017	0.377653	0.383816	0.556653	0
		0.625674	0.363433	0.485115	0	0.484173	0
		0.433004	0.605485	0.63219	0.357149	0.446905	0.4409
		0.692912	0.621954	0	0	0.521694	0.558461
		0.377054	0.860706	0.332028	0	0.560956	0
		0.840257	0.569509	0.567074	0	0.709286	0.327426
		0.655318	0.283766	0.632384	0	0.590907	0.553716
		0.730275	0.50344	0.562009	0.325748	0.653813	0.437968
		0.66513	0.536782	0.653047	0.505705	0.075932	0.313658
		0.724319	0.384586	0.389683	0	0.448142	0.403635
		0.655236	0	0.576799	0.651008	0.586103	0.597654
		0.987357	0	0	0.478993	0.446848	0
		0.634626	0.387487	0.591222	0	0.644155	0.26561
		0.668	0.730328	0.649564	0	0.552009	0
		0.674521	0.50038	0.657947	0.315385	0.61671	0.295155
		0.67044	0.417163	0.461808	0.507281	0.559572	0.510547
		0	0.357893	0.588326	0	0.358034	0.358225
		0.645597	0	0.592823	0.193989	0.293066	0.574845
		0	0.568363	0.550396	0.549006	0.562179	0
		0.658533	0.506998	0.485067	0.401344	0	0.315314
		0.631418	0.541413	0.562514	0.318562	0.298055	0.564807
		0.619209	0.814951	0.207598	0.578723	0.362108	0.521339
		0.673164	0.612545	0.376295	0.539663	0.545404	0.402116
		0.642078	0.669682	0.483684	0.250129	0.725918	0.457768
		0.667899	0.627036	0.553569	0.561866	0.473927	0
		0.283149	0.492143	0.518371	0.4262	0.580451	0.249888
		0.629396	0.54298	0.457418	0.446766	0.635106	0
		0.982689	0.75909	0.594692	0.57619	0	0.290446
		0.601441	0.571294	0.654142	0.337896	0.57413	0.424071
		0.609825	0.49225	0.65389	0.397688	0.377682	0.587825
		0.612483	0.581339	0.556761	0.159156	0.630305	0.474637
		0.747777	0.801426	0.535964	0	0.521876	0.344206
		0.785139	0.683604	0.465198	0.213194	0.636259	0
		0.63843	0.513261	0.559577	0.507639	0.650248	0.462506
		0.199981	0.612747	0.61852	0.461093	0.608457	0
		0.677098	0.551608	0.585757	0.401833	0.553345	0.640576
		0.708391	0.476898	0.518762	0.623027	0.402352	0.344656
		0.748743	0.745114	0.50826	0.25837	0.615003	0
		0.690341	0.857478	0.574845	0.419819	0.429654	0.504453
		0.64783	0.535796	0.538852	0.508677	0.394405	0.470702
		0.696979	0.484277	0	0.432001	0.624827	0
		0.627163	0.599854	0.567306	0.317384	0.63949	0
		0.352528	0	0.551171	0	0.677943	0.408072
		0	0	0.589757	0.331671	0.711415	0.35496
		0.785262	0.533758	0.417401	0	0.488992	0.644986
		0.630897	0.593654	0.544478	0	0.528634	0.663981
		0.668784	0.574144	0.546108	0.478153	0.741095	0.539982
		0.781136	0.686149	0.541717	0.201821	0.280278	0.425733
		0.606082	0.638875	0.45449	1.11729	0.411369	0
		0.756766	0.42219	0.539613	0.453804	0.367383	0.327019
		0.702941	0.284504	0.444794	0.47307	0.270011	0.386512
		0.18308	0.397889	0.683141	0.385349	0.627831	0.579186
		0.685213	0.573865	0.5105	0	0	0.407101
		0.752409	0.691249	0.404214	0.318392	0.480911	0
		0	0.440815	0.468825	0	0.553858	0
		0.685643	0.612496	0.575126	0	0.668238	0
		0.666007	0.651181	0.484656	0	0.711549	0
		0.637979	0.560164	0.247922	0.420975	0.384009	0
		0.652091	0.752658	0.586274	0.387407	0.523674	0.327463
		0.506191	0.135971	0.54671	0.492992	0.402697	0.698581
		0.66911	0.302803	0.542609	0.430844	0.656845	0
		0.724068	0	0.284259	0.276146	0.734716	0.361042
		0.584253	0.410806	0.472063	0.555496	0.505138	0.485128
		0.748765	0.215161	0.341787	0.309043	0	0.365664
		0.744798	0.401152	0.531344	0.396477	0.663981	0.426798
		0.743562	0.708525	0.518958	0	0.209997	0.536647
		0.785497	0.54973	0.535666	0	0.72964	0.360696
		0.65277	0.572589	0	0.444368	0.679256	0
		0.681058	0.596633	0.587451	0.333789	0.460512	0.438302
		0.649978	0.627428	0.502872	0.231608	0.485774	0.244025
		0.680889	0.468568	0.451358	0	0.698227	0.323144
		0.582821	0.736948	0.474181	0	0.588074	0.399517
		0.608488	0.534725	0.584135	0	0.485411	0.228494
		0.52508	0.591493	0.621496	0	0.660919	0.592493
		0.648699	0.378941	0.612	0.369289	0.665812	0
		0.564905	0.712417	0.737762	0.29704	0.496108	0.081542
		0.343502	0.356256	0.624747	0	0.561821	0
		0.621355	0.506949	0.59945	0.335462	0.575126	0
		0.697175	0.471381	0.630307	0.254334	0.379178	0
		0.773043	0.512859	0.560966	0.075125	0.377824	0.345663
		0.619527	0.531506	0.5819	0.496347	0.346186	0.570246
		0.577992	0.397481	0.589894	0.240429	0.513468	0
		0.716146	0.615197	0.5722	0	0.69522	0.266163
		0.356396	0.704086	0.576407	0.570574	0.634571	0.434829
		0.574653	0.351075	0.564314	0	0.319525	0.349107
		0.687995	0.374822	0.478961	0.338714	0.519072	0.476925
		0.600638	0.458966	0.544719	0.507167	0.582727	0.21103
		0.677238	0	0.525653	0.273121	0	0
		0.545973	0.916418	0	0.322211	0.50288	0.548261
		0.652195	0.303335	0.507513	0.319752	0.694708	0
		0.718998	0.529333	0.416033	0.404697	0.732407	0
		0.672011	0.693171	0.445531	0.374497	0.255442	0.62851
		0.670688	0.594826	0.636147	0.530357	0.678374	0
		0.571709	0.545681	0.453473	0.340432	0.497811	0.489335
		0.563929	0	0.616177	0.480823	0.518015	0.48231
		0	0.552535	0.513831	0	0.431132	0.609604
		0.642442	0.580065	0.47684	0.560765	0.622167	0.327782
		0.580311	0.660264	0.578254	0	0.710454	0.402334
		0.646611	0.45701	0.532988	0.220669	0.577068	0.757572
		0.663784	0.708701	0.624881	0	0.703824	0.486438
		0.624058	0.741595	0.537377	0.20144	0.434546	0.312134
		0.806166	0.643443	0.591553	0.258659	0.477355	0.511146
		0.678926	0.64302	0.54189	0.35653	0.423928	0
		0.648137	0	0.520321	0	0.4162	0.745427
		0.515167	0.520104	0.508174	0.171679	0.445927	0.345493
		0.623189	0.524491	0.567726	0.25621	0.45167	0.323673
		0.60654	0.534776	0	0	0.698317	0.19584
		0.63496	0.668154	0.518352	0.124083	0.775334	0.32652
		0.636376	0.493224	0.576312	0	0	0.172958
		0.63257	0.567886	0	0.419256	0.569266	0.558166
		0.675558	0.525505	0.606632	0.396706	0	0.224166
		0.550709	0.483672	0.498147	0.30463	0.470257	0.495999
		0.643041	0.812741	0.455076	0	0.658009	0
		0.679529	0.688357	0.529561	0.556818	0.490825	0
		0.797447	0.779326	0.360017	0.321405	0.464588	0.338913
		0.586036	0.444967	0.61952	0	0.314613	0
		0.606527	0.695073	0.535557	0	0.55402	0.461721
		0.567246	0.49372	0.535463	0.52144	0.550626	0
		0.735262	0.605209	0.64395	0.378794	0.613932	0.332688
		0.589006	0.467109	0.501379	0.512772	0.65333	0.363949
		0.66704	0.544018	0.454385	0	0.728162	0
		0.651796	0.643754	0.618381	0.609013	0.637384	0.356427
		0	0.433283	0.616097	0	0.611357	0.50903
		0.678686	0.587238	0.515727	0.2573	0.601278	0.397727
		0.544889	0.338849	0.435942	0	0.496412	0.327506
		0.631731	0.580729	0.561662	0.186039	0.573499	0.155095
		0.603301	0.750147	0.583299	0.375683	0	0.272367
		0.665853	0.485305	0.442369	0	0.656138	0.37084
		0.727039	0.575731	0	0	1.0449	0.415186
		0.676568	0.616687	0.540767	0	0.73008	0
		0.594471	0.491528	0.590432	0.231568	0.410914	0.680032
		0.722075	0.491625	0.616484	0.62775	0.682744	0.558125
		0.508326	0.545772	0.477659	0.501359	0	0
		0.655618	0.534757	0.51488	0	0.532103	0.517409
		0.742867	0.50987	0.428819	0.465	0.542088	0.50749
		0.719318	0.66874	0.482426	0.550769	0.599697	0
		0.676491	0.784955	0.613272	0	0.730102	0.681355
		0.625591	0.480403	0.552178	0.568046	0.439736	0.217603
		0.729089	0.593253	0.578086	0	0.644952
		0.800113	0.685216	0.513986	0.374238	0.465826
		0.700473	0.82885	0.570683	0.592946	0
		0.826943	0.583102	0.66769	0.365175	0.493418
		0.504318	0.432731	0.436239	0	0.193176
		0.860064	0.514678	0.543343	0.562891	0.648271
		0.691744	0.505144	0.627549	0	0.604735
		0.695679	0.535613	0.555238	0	0.319844
		0.64683	0	0.329895	0	0.592085
		0.642389	0.605266	0.548202	0.380339	0.565901
		0.637437	0.323657	0.639768	0.226284	0.603874
		0.643424	0.518765	0.520062	0.223826	0.676579
		0.794642	0.269149	0	0	0.561565
		0.638844	0.431526	0.56695	0.473205	0.537722
		0.627911	0.687525	0.455899	0	0.54402
		0.726487	0.420643	0.583664	0	0.644752
		0.727227	0.754797	0.600864	0	0.582213
		0.565966	0.602543	0.26644	0	0.296426
		0.667795	0.647498	0.543202	0	0.58857
		0.676753	0.630462	0.50623	0	0.504922
		0.748298	0.720678	0.661876	0	0.600042
		0.664808	0.612871	0.519336	0.308157	0.575425
		0.638045	0.509056	0.508817	0.440451	0.571214
		0.662124	0.615369	0.603823	0	0.451735
		0.639383	0.654271	0.314513	0.27415	0.549134
		0.797408	0.274809	0.414559	0.573811	0.479489
		0.323069	0.481699	0.502714	0.142208	0.708072
		0.671436	0.368323	0.586044	0.394855	0.499939
		0.784294	0.542789	0.645507	0	0.531805
		0.656895	0.639876	0.571727	0	0.599634
		0.66817	0.547966	0.611872	0	0.371845
		0.92814	0.620054	0.542469	0	0.608657
		0.596471	0.358143	0.540235	0.327478	0.430408
		0.5563	0.528763	0.527886	0.312057	0.531395
		0.539279	0.833693	0.465422	0.427645	0.653482
		0.675972	0.826122	0.695161	0.57942	0.753156
		0.50625	0.277517	0.470474	0	0.622875
		0.428292	0.528243	0.395298	0	0.579331
		0.571088	0.634127	0.603366	0.247884	0.688709
		0.702662	0.544032	0.541711	0	0.776986
		0.617053	0.652876	0.599692	0.31074	0.579505
		0.929093	0.307132	0.631212	0.563719	0.673061
		0.629619	0.514735	0.626249	0.372235	0.60228
		0.699258	0.637085	0.66525	0.524937	0.568865
		0.648611	0.643264	0.540406	0.462416	0.726354
		0.604222	0.227223	0.662016	0.361065	0.589396
		0.671078	0.609751	0.564002	0	0.607724
		0.532429	0.508193	0.527621	0	0.722867
		0.755741	0.572962	0.593156	0.519217	0.470812
		0.682347	0.518164	0.486173	0	0
		0.563661	0.472274	0.683365	0.563409	0.478173
		0.729413	0.640113	0.401537	0.401984	0.549376
		0.659844	0.315607	0	0.172659	0
		0.628213	0.639818	0.511417	0.606657	0.387543
		0.662432	0.664598	0.561369	0.523467	0.469221
		0.629036	0.64729	0.489102	0	0
		0.554279	0.659472	0.586655	0.418832	0
		0.605	0.726103	0.558996	0.421777	0
		0.650696	0.522965	0.484217	0	0.631176
		0.647784	0.698419	0.594474	0	0.455949
		0.647017	0.237772	0.457687	0	0.557099
		0.295997	0.547904	0.567545	0.21316	0.444631
		0.635566	0.316559	0.556416	0.434006	0.476304
		0.636138	0.593383	0.587364	0	0.572748
		0.680723	0.285128	0.339684	0.624897	0.611749
		0.570304	0.590875	0.570637	0.230024	0
		0.632329	0	0.474644	0.408323	0.545275
		0.675223	0.476962	0.597478	0	0.587783
		0.715413	0.65379	0.529954	0.399046	0.429951
		0.664234	0.545333	0.60735	0	0.598649
		0.59689	0.657244	0.580431	0.135777	0.557116
		0.595022	0.600581	0.47148	0	0.452614
		0.642938	0.424775	0	0	0.655726
		0.761674	0.652166	0.46673	0	0.482834
		0.156004	0.546181	0.497595	0.622563	0.559779
		0.711002	0.386221	0.605302	0.323086	0.670458
		0.315749	0.542896	0.390298	0	0.344983
		0.627518	0.413344	0.618975	0.561936	0.579404
		0	0.543466	0.539538	0	0.443759
		0.711817	0.73758	0.514692	0	0.485926
		0.639058	0.650073	0.590995	0.41638	0.484482
		0	0.659968	0.658833	0.541383	0.592571
		0.694212	0.618799	0.56235	0.097304	0.517896
		0.842816	0.970197	0.467483	0.315842	0.552061
		0.791134	0.449866	0.436234	0.431155	0.569419
		0.697792	0.482619	0.450868	0.499747	0.708236
		0.629589	0.787337	0.429799	0	0.498162
		0.676869	0.546	0.388648	0.464262	0.411744
		0.640182	0.601095	0.623346	0.313699	0.755264
		0.60512	0.582859	0.546363	0.529513	0.482269
		0.569516	0.50455	0	0.533578	0.341262
		0.620043	0	0.510617	0.585684	0.627647
		0.672097	0.545786	0.540953	0.456555	0.326889
		0.807006	0.395405	0.477357	0	0.633613
		0.632499	0.793167	0.595271	0.284289	0.502051
		0	0.556494	0.627701	0	0
		0.543087	0.639415	0.285523	0.47912	0.634214
		0.586312	0.507692	0.601013	0.322371	0.636386
		0.628227	0.564737	0.443314	0.393403	0.472725
		0.56591	0.560583	0.552306	0.342641	0.327457
		0.568887	0.333233	0	0	0.4755
		0.595673	0.455487	0.644391	0.261667	0.524898
		0.709444	0.537973	0.627157	0.277703	0.151516
		0.647394	0.613215	0.569418	0.280811	0.536935
		0.68937	0.658678	0.577328	0.429383	0.598413
		0.588314	0.704853	0.535622	0	0.661352
		0.688229	0.321747	0.674133	0	0.546251
		0.813533	0.495493	0.485032	0	0.597517
		1.48458	0.877705	0.540675	0.22165	0.513376
		0.631191	0.562759	0.604607	0.597682	0.747804
		0.707576	0.515005	0.623925	0.528303	0.567402
		0.800367	0.388143	0.615907	0	0.531125
		0.624964	0.365207	0.524625	0.431793	0.548923
		0.611977	0.613201	0.474923	0	0.305456
		0.634212	0.579699	0.59508	0	0.472732
		0.639565	0.54175	0.566051	0.523667	0
		0.620545	0.585986	0.593707	0.560685	0.321786
		0.595729	0.653381	0.520718	0.533323	0.5446
		0.657587	0.640495	0.564466	0	0
		0.690537	0.538708	0.495146	0.242332	0.538504
		0.63009	0.539828	0.555476	0.522296	0
		0.682988	0.792998	0.150754	0.195697	0.562021
		0.722367	0.531618	0.577595	0	0.684766
		0.666484	0.660607	0.532518	0	0.435703
		0.606815	0.533186	0.580102	0.44295	0.486631
		0.194805	0.624479	0.579932	0.415125	0.704759
		0.744098	0	0.404389	0.460821	0.48221
		0.605133	0.245365	0.522025	0	0.54516
		0.693769	0.334316	0.516883	0	0.618515
		0.648255	0.637996	0.567083	0	0.473341
		0	0.585297	0.578842	0	0.516639
		0	0.719631	0.626007	0	0.642806
		0.675584	0.433349	0	0.435224	0.287518
		0.688405	0.514785	0.627574	0.614537	0.561209
		0.652826	0.464986	0	0	0
		0.594875	0.759276	0.677589	0.355966	0.707535
		0.741857	0.564504	0.516844	0.544024	0.58342
		0.678654	0.377412	0.516786	0	0
		0.110955	0.296198	0.562187	0	0.656275
		0.731894	0.458784	0	0.230935	0.350919
		0.628178	0.357661	0.643847	0.387256	0.26449
		0.630741	0.461793	0	0	0.335733
		0.662931	0.456845	0.315693	0.468981	0.594779
		0.575108	0.366907	0.474257	0	0.426505
		0.666589	0.689671	0.410061	0	0.601868
		0.872973	0.747011	0.583673	0	0.630967
		0.650175	0.359869	0.290376	0.616158	0.432139
		0.702267	0.585068	0.488493	0	0.70544
		0.717825	0.454569	0.469625	0	0
		0.479513	0.560688	0.532021	0.256442	0.633162
		0.651327	0.717268	0.619672	0	0.676075
		0.785479	0.500896	0.598788	0.284698	0
		0.577698	0.606163	0.411419	0	0.483659
		0.768933	0.643561	0.323741	0.543819	0.610945
		0.652489	0.333732	0.564137	0.379538	0.306556
		0.728144	0.727561	0.658181	0.402989	0.63442
		0.67911	0.440012	0.627237	0	0.66852
		0.667253	0.501959	0.554291	0.427226	0.62752
		0.585959	0.517372	0.54683	0	0.523879
		0.30056	0.559971	0.506981	0	0.58381
		0.655984	0.586758	0	0.373432	0.399813
		0	0.637486	0.606353	0.504239	0.352093
		0.672868	0.381453	0.220027	0.459735	0.464371
		0.604817	0.627263	0.54502	0.575647	0.374442
		0.709906	0.526276	0.558876	0	0.498235
		0.41756	0.564525	0.551129	0	0.383453
		0.161311	0.810111	0.490592	0.455313	0.318147
		0.625703	0.294005	0.609412	0.376106	0.617901
		0.429982	0.603367	0.563571	0.21728	0.528472
		0.58669	0.466875	0.585147	0.355459	0.51247
		0.617292	1.17603	0.547288	0.405714	0.55103
		0.65545	0	0.483142	0.525206	0.271501
		0.760777	0.431416	0.554995	0	0.759989
		0.66413	0.679256	0.599804	0.167503	0
		0.678406	0.726844	0.571209	0	0.267949
		0.390321	0.578826	0.539255	0	0.626126
		0	0.414936	0.531109	0	0.547852
		0.695147	0.587461	0.613058	0	0.267395
		0.695525	0.535948	0.511396	0	0.427877
		0.658162	0.503127	0.485857	0.36498	0.349959
		0.656181	0.526432	0	0	0.542986
		0.660565	0.302848	0.569563	0	0.646077
		0.699612	0.600804	0.406436	0	0.723117
		0.315119	0.529038	0.545376	0.216202	0.503232
		0.571996	0.562924	0.616168	0	0.345377
		0.620377	0.637536	0.529387	0.382415	0.579591
		0.437996	0.387139	0	0.502464	0.424115
		0.658453	0.526911	0.570643	0	0.721409
		0.554908	0.569875	0.445144	0.413499	0.422269
		0.663894	0.475547	0.475368	0.575846	0.573658
		0	0.38343	0	0.282011	0.343194
		0.652103	0.459648	0.544396	0.59069	0.579003
		0.599548	0.50586	0.54754	0	0.501837
		0.717739	0.554242	0.578275	0	0.612659
		0.656398	0.638149	0.552338	0.462777	0.734039
		0.654568	0.651209	0.501252	0.411237	0.631556
		0.302632	0.512636	0.547865	0.335439	0.595347
		0.665909	0.631485	0.60953	0.362107	0.528902
		0.620352	0.49098	0.580767	0	0.642591
		0.632705	0.487842	0	0.549336	0.457249
		0.675735	0.513064	0.601464	0.298303	0.569493
		0.688059	0.477292	0.568638	0.270162	0.448148
		0.609305	0.64892	0.456801	0.295897	0.57025
		0.508732	0.531322	0.531904	0.543685	0.317998
		0.653992	0.610958	0.55667	0.193044	0.808805
		0	0.620738	0.546919	0.303758	0.335096
		0.62975	0.909393	0.53281	0	0.424233
		0.672155	0.438593	0.542411	0.300629	0.310094
		0.702639	0.564871	0.511088	0.305646	0.138994
		0.518467	0.621572	0.593396	0	0.304667
		0.667499	0.776741	0.612659	0	0.629499
		0.718624	0.503388	0.584083	0.489379	0.686075
		0.624879	0.279128	0.587077	0.204662	0
		0.622025	0.679403	0.440126	0.341993	0.435325
		0.634262	0.56735	0.251287	0	0.626659
		0.691799	0.386001	0.505384	0.605635	0.586413
		0.662375	0.582265	0.489231	0	0
		0.659364	0.718663	0.488738	0	0.608969
		0.670449	0.351509	0.625739	0	0.366477
		0.745424	0.581213	0.583051	0.599634	0.615647
		0.671443	0.610118	0.606103	0.375742	0
		0.668562	0.53561	0.536774	0.455603	0.616681
		0.679413	0.563641	0.603304	0.583332	0.500246
		0.69792	0.5802	0	0.516456	0.560926
		0.613334	0.393683	0.478327	0.488362	0.242664
		0.400464	0.474432	0.53818	0.505692	0.592983
		0.557425	0	0.512884	0	0.585529
		0.610894	0.619029	0.466982	0.518992	0
		0.678154	0.582388	0.533979	0.595801	0
		0.569467	0.791638	0.43634	0.383402	0.666218
		0.676455	0.63257	0	0.266061	0.804931
		0.663086	0.611929	0.527369	0	0.404079
		0.726675	0.426047	0	0	0
		0.651151	0.743576	0.485682	0.322914	0.535961
		0.619395	0.427066	0.513302	0	0.642923
		0.644706	0.477602	0.570047	0	0.159585
		0.647847	0.643444	0.476842	0	0.513671
		0.692023	0.685784	0.397273	0.521628	0
		0.077606	0.488569	0.532143	0.345109	0.421746
		0.584526	0.490911	0.630537	0	0.47359
		0.699431	0.526186	0	0	0.498625
		0.758617	0.444939	0.61592	0.365872	0.625715
		0.544593	0.187201	0.577053	0.246641	0.412344
		0.657622	0.303663	0.506755	0.240616	0
		0.755483	0.701493	0.576337	0	0.567306
		0.852793	0.243816	0.40637	0.403151	0.437468
		0.666475	0.575809	0.464289	0.368979	0.599582
		0.653322	0.591501	0.550441	0	0.462121
		0.6754	0.47566	0.549792	0.406406	0.511342
		0.647738	0.70961	0	0	0.51732
		0.592624	0	0.600002	0.181582	0.718306
		0.597605	0.78614	0.574907	0	0.346401
		0.79288	0.483168	0.613604	0.397407	0.568893
		0.550673	0.582282	0.565606	0	0
		0.684178	0.656506	0.635132	0.190957	0.35497
		0.643094	0.457983	0.537872	0.479905	0.586376
		0.706928	0.635659	0.49167	0.343021	0.481629
		0.645372	0.390179	0.583	0	0.570546
		0.62559	0.305999	0.649821	0	0.483484
		0.555114	0.705099	0.524135	0	0.522653
		0.920513	0.295478	0.501648	0.283283	0.592798
		0.669735	0.470893	0.632375	0.27356	0.577575
		0.363331	0.496025	0.465716	0	0.251376
		0.703561	0.499221	0.514994	0.27854	0.459102
		0	0	0.490903	0.378727	0
		0.609144	0.278156	0.576412	0	0.644536
		0.651219	0.55542	0.461156	0.320131	0.585193
		0.736823	0.550046	0.48105	0	0.660612
		0.611982	0.853193	0.579651	0.486824	0.475555
		0.635206	0.572008	0.592657	0	0.41635
		0.706487	0.392097	0.458223	0.51862	0
		0.547318	0.525919	0.637355	0.370728	0.555369
		0.640173	0.490864	0.616663	0.476198	0.533913
		0.880199	0.587468	0.272552	0	0.564853
		0.60024	0.561351	0.575331	0.271236	0.52599
		0.644183	0.696403	0.368405	0.462658	0.44513
		0.768462	0.646927	0.473692	0	0.379215
		0.618256	0.677402	0.592175	0.456408	0.263687
		0.573801	0.575835	0.562973	0	0.650615
		0.672025	0.477427	0.736485	0.461739	0.762297
		0.599622	0.340999	0.633423	0.166221	0.248166
		0.634605	0.675875	0.606192	0	0.4835
		0.646729	0.619939	0.592257	0.393427	0.621859
		0.588965	0.555559	0.414314	0.319654	0.630673
		0.666682	0.519367	0.418344	0	0
		0.909098	0.645786	0.332441	0	0.512415
		0.677098	0.253819	0.517885	0.430628	0.753995
		0.643572	0	0.491585	0	0.268548
		0.717146	0.443881	0	0.556929	0.583534
		0.739508	0.459033	0.426218	0.325537	0.614495
		0.577707	0.593361	0.498131	0.218922	0.586072
		0.500464	0.664983	0.358779	0	0.572876
		0.689099	0.704723	0.576878	0.293704	0
		0.556677	0.316443	0.539053	0.37223	0.509481
		0.685254	0.59178	0.566691	0	0
		0.651214	0.513724	0.506642	0	0.394328
		0	0.540533	0.598552	0	0
		0.711087	0.354196	0.637532	0.454321	0.544485
		0.706602	0.614889	0.652881	0.373176	0.142996
		0.654137	0.369895	0.527306	0.602399	0.55691
		0.702118	0.596974	0.676917	0.409638	0.282461
		0.598564	0.325255	0.408439	0	0.817303
		0.604003	0.617582	0.458155	0.365581	0.50772
		0.524878	0.483185	0.561852	0.183274	0.709546
		0.673341	0.577337	0.61162	0	0.295855
		0.680557	0.496309	0.537295	0	0.427025
		0.649995	0.652649	0.457719	0.13584	0.579065
		0.546742	0.608991	0.498779	0.542585	0.618729
		0.70463	0.684947	0.59176	0.325755	0.549804
		0.690009	0.458713	0.458317	0.185157	0.801386
		0.634009	0.408725	0.550972	0.252875	0.475571
		0.463529	0.413021	0.274997	0.139906	0.556863
		0.566172	0.530321	0.530787	0.322575	0
		0.795275	0.259904	0.500322	0.452243	0.55777
		0.599873	0.533537	0.616963	0.472176	0.424446
		0.645452	0.741348	0.538072	0	0.543063
		0.60462	0	0.627863	0	0.573496
		0.640613	0.407908	0.451149	0	0.225198
		0.664329	0.489461	0.449225	0.532723	0.651019
		0.629439	0.516751	0.615241	0.529186	0.729878
		0.3829	0.542967	0.477458	0.378217	0.572019
		0	0.605243	0.444226	0.147866	0.540944
		0.76346	0.588233	0	0	0.298999
		0.760013	0.394838	0.720522	0.340813	0.631539
		0.71659	0.494317	0.58502	0.65441	0.382493
		0.670502	0.261773	0.661318	0.248854	0.363392
		0.660245	0	0.478242	0	0
		0.7177	0	0.488019	0.508986	0.44626
		0.587827	0.523961	0.624342	0.495798	0.228671
		0.690661	0.565434	0.471887	0	0.627962
		0.67969	0.667326	0.440193	0.451681	0
		0.647545	0.227723	0.590873	0	0.524329
		0.608189	0.577586	0.574051	0	0.635456
		0.647959	0.65936	0.398719	0.455831	0.589224
		0.640735	0.525266	0.494836	0.133483	0.634846
		0.620993	0.681388	0.574846	0	0.253482
		0.630254	0.447594	0.553381	0.524993
		0.65293	0.645581	0.49661	0
		0.638139	0.268205	0.562038	0.346486
		0.679001	0.544905	0.227596	0.386557
		0.658729	0.417967	0.528628	0
		0.159331	0.339499	0.601231	0
		0	0.335677	0.583061	0.508599
		0.657055	0.453599	0.207086	0.300213
		0.445531	0.429296	0.705049	0
		0.662919	0.531226	0.357927	0.394418
		0.691314	0.422341	0.521505	0
		0.696623	0.765639	0.300454	0
		0.741195	0.613858	0.485288	0
		0.643454	0.411099	0.459476	0
		0.654422	0.537491	0.476796	0
		0.702629	0.570343	0.58689	0.307999
		0	0.643428	0.594861	0
		0.692498	0.535035	0	0
		0.734281	0.789937	0.48285	0
		0.648579	0.574206	0.522056	0
		0.667553	0.755608	0.521543	0
		0.558146	0.489295	0.537178	0
		0.675465	0.297931	0.586954	0
		0.165394	0.638639	0.5334	0.493408
		0.666233	0.482666	0.550194	0.303147
		0.664495	0.423928	0.525381	0.290077
		0.611318	0.596468	0.569975	0.536494
		0.453714	0.834423	0.627463	0.309175
		0.642506	0.675654	0.609216	0.275771
		0.331328	0.573347	0.343116	0
		0.622697	0.590471	0.430712	0
		0.668119	0.554926	0.562875	0.127567
		0.942372	0.623744	0.576774	0.303912
		0.695936	0.26294	0.316013	0.463822
		0.47206	0.494048	0.510045	0.332376
		0.725771	0.566309	0.231544	0.369399
		0.68987	0.561424	0.339913	0
		0.66483	0.646833	0.419248	0.186267
		0.65036	0.654812	0.599058	0
		0.642751	0.446814	0.498282	0.193381
		0.612753	0.408617	0.502469	0
		0.697215	0.649527	0.16301	0
		0.268196	0.359772	0.634334	0.3303
		0.650951	0.343487	0.559723	0.412834
		0.586935	0.652576	0.386662	0
		0.679701	0.710952	0.481473	0.449052
		0.707713	0.406427	0.546165	0.396063
		0.541951	0.715626	0.578443	0.426356
		0.590883	0.474772	0.604796	0.344485
		0.725782	0.497406	0.258811	0.337078
		0.695446	0.514723	0.612884	0
		0.627091	0.45494	0.607347	0.415594
		0.730631	0.397406	0.466905	0
		0.650638	0.705842	0	0.409408
		0.662285	0.656487	0.459204	0.409157
		0.64739	0.58803	0.550826	0
		0.624303	0.511299	0.575626	0
		0.314609	0.864295	0.683794	0.327767
		0.634505	0.46527	0.488373	0.095885
		0.75903	0.466101	0.672272	0
		0.69878	0.414108	0.575677	0.154079
		0.668715	0.531282	0.639755	0
		0.682335	0.483171	0.551845	0.443092
		0.642967	0.446111	0.473184	0.256022
		0.670142	0.593563	0.498592	0.266429
		0.632124	0.535147	0.094525	0.313926
		0.691993	0.5699	0.600115	0.167568
		0.61856	0.591419	0.449779	0
		0.690392	0.569241	0.483024	0
		0.657114	0.240546	0.518447	0
		0.727141	0.408039	0.537155	0.168754
		0.631912	0.43994	0.306996	0
		0.732651	0.710613	0.540353	0.439777
		0.65136	0.745223	0.362488	0.444453
		0.693409	0.483329	0.49473	0
		0.250423	0.354472	0.519524	0.217713
		0.668979	0.635321	0.460414	0.434336
		0.762511	0.557609	0.462862	0
		0.476898	0.47584	0.387032	0.453532
		0.646435	0.563301	0.43826	0.266801
		0.762142	0.369168	0.564886	0.614763
		0	0	0.620025	0.263091
		0.623967	0.620098	0.573325	0.408849
		0.761682	0.512788	0.546424	0.274977
		0.563024	0.454298	0	0.5774
		0.683441	0.368762	0.548948	0.296486
		0.704804	0	0.55497	0
		0.570208	0.514767	0.574203	0.474456
		0.723949	0.406579	0.671508	0
		0.585921	0.678821	0.510282	0.431561
		0.678877	0.64696	0.145409	0
		0	0.738969	0.553482	0.444224
		0.62908	0.650709	0.4364	0.239214
		0.662408	0.593821	0.578641	0
		0.73104	0.570545	0.546029	0
		0	0.479138	0.598482	0
		0.635624	0.405624	0	0
		0.163756	0.479987	0.661703	0
		0.671784	0.521785	0.591753	0
		0.693298	0.502866	0.572733	0.363425
		0.695997	0.459825	0.414141	0
		0.660773	0.584559	0.669669	0.348045
		0.634794	0.591662	0.367375	0
		0.696549	0.538769	0.527157	0
		0.631153	0.530836	0.568892	0.21755
		0.699369	0.604542	0.532406	0
		0.640377	0.576514	0.239295	0.069497
		0.526928	0.587799	0.579492	0.373454
		0.635377	0.240862	0.584983	0
		0	0.579444	0.599149	0
		0.658113	0.384451	0.603492	0
		0.649533	0.571754	0.539408	0.595186
		0.852693	0.503448	0.540395	0
		0.667437	0	0.580491	0.336143
		0.598624	0.596846	0.481166	0
		0	0.688476	0.400294	0.194482
		0.7424	0.811331	0.566503	0
		0.711406	0.462438	0.478649	0
		0.681743	0.508535	0.560583	0.462652
		0.625727	0.535724	0.582473	0.38426
		0.668051	0.694164	0.310501	0
		0.722884	0.386577	0.597724	0.596764
		0.710967	0.248654	0.622525	0
		0.648525	0.174133	0.527259	0.434531
		0.781339	0.415219	0.512495	0.178577
		0.406825	0.546996	0.49784	0.588176
		0	0.444617	0.49851	0
		0.743244	0.461658	0.489747	0
		0.603012	0.509708	0.605434	0
		0.618181	0.651966	0.542087	0.282717
		0.640125	0.606855	0.652482	0.516303
		0.591322	0.394125	0.560897	0.477048
		0.744147	0.613205	0.50602	0
		0.656555	0.289067	0.550845	0
		0.624361	0.721291	0.505695	0
		0.633896	0.532785	0.526217	0.434586
		0.74555	0.618508	0.59011	0.405945
		0.621171	0.73322	0.489103	0.302845
		0.751791	0.308278	0.522514	0
		0.733706	0.196558	0.434279	0.364091
		0.722685	0.460329	0.452022	0.311248
		0.639048	0.793533	0.290755	0
		0.57091	0.609053	0.289995	0.358903
		0.721581	0.560609	0.46627	0
		0.672895	0.493132	0.599852	0.436603
		0.647594	0.570396	0.558175	0
		0.654066	0.747365	0.518312	0
		0.647217	0.499344	0.513535	0
		0.642757	0.677593	0.574365	0.497106
		0.694319	0.704559	0.585615	0.564917
		0.659164	0.503425	0.510518	0
		0.68929	0.558476	0.527012	0.435165
		0.675543	0.445238	0.528974	0.358808
		0.606887	0.381653	0.615925	0
		0.216199	0.648727	0.575822	0
		0.502251	0.332225	0.60897	0
		0.525268	0.49259	0.484705	0
		0.600071	0.693219	0.381988	0
		0.733103	0.482783	0.463195	0.46926
		0.507184	0.503859	0.395484	0.390505
		0	0.37532	0.300744	0.233332
		0.527438	0.6555	0.557886	0
		0.688505	0.428005	0	0.21179
		0.639423	0	0.476085	0.496594
			0	0.655352	0.486406
			0.523173	0.485483	0.417174
			0.558643	0.572877	0.425834
			0.515169	0.408224	0.59208
			0.598917	0.443021	0
			0.523177	0.578481	0
			0.11347	0.424031	0
			0.437573	0.370172	0
			0.550908	0.571296	0
			0.457401	0.486329	0
			0.559646	0.607999	0
			0.589379	0.605755	0
			0.548172	0.439096	0
			0.680602	0.501546	0.455004
			0.552964	0.574509	0.394642
			0.58503	0.5222	0.40688
			0.430281	0.52688	0.546621
			0.605252	0	0.311293
			0.50801	0.539961	0
			0.462814	0.540737	0.379657
			0.388754	0.588276	0
			0.324644	0.681026	0
			0.547022	0.415119	0.460801
			0.370955	0.481476	0
			0	0.552854	0
			0.530265	0.557827	0.201982
			0.423576	0.617786	0.504164
			0.700331	0.648058	0.573087
			0.336317	0.554504	0
			0.158403	0.528782	0.558596
			0.662824	0.407718	0.395525
			0.633783	0.537095	0
			0.541079	0.531205	0.362044
			0	0.551797	0
			0.575991	0.520093	0.635454
			0.331607	0.533194	0.600988
			0.022394	0.524832	0
			0.2627	0.393788	0.522368
			0.419778	0.32341	0.290582
			0	0.398251	0.408303
			0.547379	0.484708	0
			0.448083	0.498186	0.383998
			0.69973	0.541632	0.238871
			0.463243	0.538388	0.532229
			0.647642	0.530111	0.541973
			0.651202	0	0.295424
			0.347938	0.499661	0.572933
			0.507314	0.407162	0.604388
			0.735979	0.590192	0.338079
			0.420465	0.550629	0.131377
			0.456587	0.514794	0
			0.300037	0.497645	0
			0.479481	0.629791	0.192748
			0.619996	0.559639	0.598662
			0.654357	0.526746	0
			0.759493	0.463067	0
			0.587048	0.535426	0.537731
			0.641915	0.530032	0.36628
			0.69076	0.633964	0.312327
			0.390095	0.491326	0.256863
			0.651425	0.606675	0
			0.64351	0.560021	0
			0.560968	0.25479	0.234857
			0.47564	0.557232
			0.767823	0.565984
			0.689063	0
			0.524075	0.401851
			0.525051	0
			0.525148	0.480779
			0.663735	0.594505
			0.629399	0.58519
			0.33283	0.507912
			0.601422	0.590118
			0.658682	0.416318
			0.511131	0.414672
			0.658994	0.59499
			0.717979	0.653069
			0.287463	0.594514
			0.575363	0.559303
			0.721288	0.597932
			0.569934	0.386119
			0.616448	0.531962
			0.633272	0.583937
			0.375113	0.482946
			0.76726	0.501383
			0.461103	0.570091
			0.622774	0.512031
			0.446548	0.616523
			0.45827	0.550011
			0.20574	0.346295
			0.749995	0.482174
			0.191215	0.536494
			0.396896	0.479307
			0.482685	0.555505
			0.205053	0.369624
			0	0.599536
			0.445913	0.513304
			0.439828	0.474796
			0.393927	0.565447
[truncated: 514 more rows]

## Sheet: Figure 5E
HSC	HSC (Oligomycin)	MPP	MPP (Oligomycin)	GMP	GMP (Oligomycin)	MEP	MEP (Oligomycin)	CMP	CMP (Oligomycin)	CLP	CLP (Oligomycin)
0.640322	0.671958	0.713791	0	0.542313	0	0.55488	0.244675	0.623415	0.293507	0.551839	0.470825
0.707834	0.714618	0.618883	0	0.619052	0.336093	0.595129	0	0.430805	0.292087	0.584599	0.532143
0.72711	0.678585	0.047175	0.590452	0.610763	0.353866	0.664446	0	0.526279	0.390277	0.647829	0.390986
0.735584	0.75177	0.660598	0.553864	0.614864	0	0.624311	0.32206	0.380712	0.206658	0.815264	0.369304
0.7466	0.719746	0.660726	0.625425	0.458461	0.420035	0.716967	0.332178	0.455566	0	0.656956	0.324823
0.636333	0.771167	0.569009	0.610531	0.592552	0.426443	0.609501	0.302714	0.568431	0	0.628564	0.482721
0.643383	0.602783	0.662958	0.695634	0.5613	0.303122	0.589418	0.219203	0.448493	0.426395	0.745064	0
0	0.724952	0.612934	0.589834	0.57589	0.320019	0.596321	0.722091	0.574007	0.302204	0.607229	0.187856
0.6859	0.711806	0.636386	0.606876	0.542095	0.576454	0.715298	0	0.656883	0.453523	0.578188	0.316609
0.556174	0.758706	0.670541	0.494014	0.593673	0	0.648983	0	0.599163	0.439045	0.640628	0.288546
0.372786	0.694308	0.632108	0.643497	0.544404	0	0.6046	0.460317	0.555206	0.257666	0.526155	0.376773
0.651362	0.690686	0.7066	0.652296	0.588989	0	0.514328	0	0.61159	0.144589	0.626696	0.310028
0.767628	0.7256	0.712622	0.762038	0.486168	0	0.679216	0	0.354257	0.2302	0.65622	0.594078
0.685685	0.669217	0.537389	0.445048	0.486161	0.291594	0.556957	0.286957	0.646898	0	0.594713	0
0.678637	0.395938	0.693472	0.168951	0.530573	0	0.63369	0	0.612399	0.364434	0.703445	0.344179
0.730442	0.760311	0.680644	0.635416	0.531843	0.394656	0.736554	0	0.605262	0.223722	0.665783	0.395944
0	0.71506	0.631445	0.594437	0.606092	0.263492	0	0	0.600423	0	0.627698	0
0.648654	0.758108	0.642993	0.706536	0	0.322735	0.524064	0.413574	0.608395	0	0.704462	0.409151
0.701048	0.681813	0.763551	0.452871	0.631021	0.257421	0.577642	0.312946	0.4693	0.214413	0.665976	0.391273
0.65027	0.420214	0.628926	0.620012	0.586567	0.259974	0.644631	0.328014	0.537056	0.354171	0.53053	0
0.714516	0.683172	0.669801	0.718097	0.598449	0.305822	0.712403	0.493817	0.605408	0.234632	0.654437	0.238671
0.670901	0	0.646412	0.68316	0.614785	0.366617	0.175175	0	0.437459	0	0.644901	0
0.664463	0.635417	0.653161	0.54901	0.49982	0.337916	0.600295	0	0.526822	0.556067	0.624434	0.307742
0.716525	0.627352	0.510711	0.525313	0.5323	0	0.615408	0.286439	0.43519	0.459508	0.649514	0.103417
0.720636	0.657773	0.737622	0.58519	0.415431	0	0.697367	0	0.540054	0	0.65911	0.590064
0.712082	0.723877	0.658353	0.194499	0.640959	0	0.601725	0	0.671681	0	0.637719	0.442086
0.698486	0.587147	0.554546	0.397097	0.535594	0	0.580686	0	0.647175	0.27866	0.61577	0.350788
0.676191	0.674589	0.797869	0.583237	0.546722	0.217342	0.636385	0.275836	0.737497	0.356193	0.713268	0.685288
0.621229	0.766386	0.704454	0.589998	0.554565	0.567633	0.567792	0.291583	0.644743	0.455268	0.674853	0.303334
0.712982	0.464337	0.65684	0.690673	0.653552	0	0.646147	0	0.700055	0.323661	0.678098	0.301516
0.680855	0.633224	0.676609	0.685826	0.49686	0.451737	0.587382	0.23489	0.327908	0.408693	0.661206	0
0.653832	0.567261	0.602002	0.538525	0.639037	0.204085	0.488062	0.252124	0.574197	0.379925	0.6597	0.319616
0.630329	0	0	0.676165	0.243082	0.207129	0.470893	0.405133	0.675238	0.216228	0.643196	0.312471
0.63332	0.714875	0.595757	0.651614	0.639295	0	0.535033	0	0.594605	0.456274	0.675672	0.587575
0.675913	0.36475	0.696114	0.595585	0.566552	0	0.672437	0	0.565706	0.42289	0.587001	0.487935
0.74316	0.711739	0.556828	0.361893	0.585909	0.186549	0.666838	0	0.588866	0.282647	0.750408	0.458745
0.622028	0.655359	0.436665	0.608318	0	0.23942	0.63865	0.213446	0.609022	0.486756	0.597405	0.480721
0.703789	0.690027	0.379299	0.54951	0.714032	0	0.604583	0.267703	0.553289	0.0965	0.54373	0.526714
0.761773	0.734431	0.618983	0.576223	0.61451	0.391418	0.667095	0	0.31544	0	0.603453	0.438252
0.703867	0.619641	0.732477	0.697266	0.608916	0.351301	0.528767	0	0.512601	0.406692	0.707855	0.178115
0.680823	0.559775	0.605503	0.484392	0.591805	0	0.424545	0.128701	0.552884	0.526035	0.893653	0.213922
0.60635	0.74775	0.684381	0.645607	0.514385	0.153426	0.322185	0	0.66006	0.33991	0.709776	0.519053
0.722189		0.652126	0.366637	0.53985	0.481578	0.641365	0	0.586028	0.225957	0.650103	0.186384
0.663791		0.625138	0.373512	0.610187	0	0.472374	0.269772	0.621419	0	0.584546	0.235954
0.628399		0.640996	0.423282	0.498244	0.35566	0.644494	0	0.539351	0.631781	0.560819	0
0.723944		0.594939	0.516968	0.483917	0.367641	0.740585	0	0.665185	0	0.587079	0
0.721475		0.635989	0.625041	0.569442	0	0.683171	0.198026	0.563299	0.379089	0.689134	0.115904
0.658798		0.694652	0.618452	0.493056	0.266528	0.595292	0	0.665344	0	0.639627	0.340547
0.713004		0.641558	0.563733	0.568526	0.579468	0.659383	0.120242	0.47762	0.347853	0.736098	0.380341
0.5837		0.664912	0.683421	0.553306	0.346723	0.647585	0.293326	0.62256	0.404088	0.687477	0.499383
0.696878		0.665162	0.792031	0.569966	0.482437	0.614632	0	0.591652	0.302844	0.656995	0.059806
0.715486		0.658861	0.731542	0.610491	0	0.574369	0.209762	0.560555	0.538973	0.737255	0.470695
0.698292		0	0.612555	0.586201	0.227155	0.641335	0	0.567007	0.341651	0.670576	0
0.645185		0.636222	0.461158	0.610314	0.533839	0.499141	0	0.629128	0.216167	0.678094	0.538121
0.700522		0.794375	0.691413	0	0	0.586467	0	0	0	0.697849	0.436425
0.611839		0.560711	0.624168	0.64345	0	0.688383	0	0.561611	0.338362	0.630042	0
0.695381		0.660049	0.590256	0.606757	0	0.523245	0.489623	0.605856	0.149837	0.659448	0.44454
0.731771		0.672931	0.549941	0.490263	0	0.733977	0.512585	0.633754	0.298658	0.66449	0.669567
0.725157		0.633891	0.670468	0.571525	0	0.615638	0.564238	0.709396	0.351989	0.62739	0.56329
0.683633		0.730797	0.556312	0.588034	0.070907	0.448512	0.410775	0.68551	0	0.658801	0
0.637987		0.654612	0.149494	0.609151	0.281919	0.614793	0	0.352797	0.181865	0.601526	0.41065
0.616766		0.730962	0.661093	0.655809	0	0.615513	0	0.415926	0.580852	0.685301	0
0.358065		0.548267	0.632721	0.637202	0.160541	0.47265	0	0.586837	0.125354	0.706988	0.558403
0.668972		0.688369	0.419292	0.676105	0.228903	0.554831	0.234707	0.481582	0.307569	0.707414	0
0.748152		0.629448	0.559954	0.22629	0.261998	0.509294	0.326014	0.460289	0	0.674441	0.377287
0.677027		0.82599	0.71565	0.505375	0.360801	0.617353	0	0.656461	0.658658	0.62482	0
0.692089		0.573395	0.708906	0.644983	0	0	0	0.523797	0.283978	0.629236	0.385246
0.647727		0.637477	0.600392	0.573165	0.462219	0.699046	0	0.550714	0.404054	0.590029	0.168505
0.777527		0.628816	0.65366	0.546988	0.381435	0.567424	0	0.631728	0.539499	0.595185	0.396397
0.678289		0.620036	0.730973	0.451012	0.172471	0.794525	0	0.607551	0.337082	0.591816	0.25103
0.731087		0.725941	0.61941	0.189737	0.35935	0.54704	0	0.454734	0.407948	0.650859	0.324097
		0.630239	0.469287	0	0.314483	0.362303	0.484663	0.658141	0.309846	0.662071	0
		0.588088	0.678678	0.532258	0.299031	0.616459	0	0.548675	0.349328	0.664876	0.380855
		0.665353	0.485593	0.613992	0.239947	0.555265	0.37114	0.601772	0.364966	0.522365	0.215151
		0.536496	0.661572	0.44905	0	0.689951	0	0.665278	0	0.678084	0.396006
		0.67208	0.747406	0.603062	0	0.777606	0.103964	0.649697	0.356715	0.617401	0.316692
		0.727858	0.351605	0.613687	0.502104	0.789453	0	0.508764	0.229126	0.632809	0
		0.662722	0.339399	0.554828	0.39473	0.704558	0.707272	0.614088	0	0.594494	0
		0.587906	0.294159	0.62029	0	0.46327	0.405072	0.650794	0.436064	0.525816	0
		0.723977	0.44912	0.547082	0.287216	0.607634	0	0.507183	0	0.644786	0
		0.683054	0.643101	0.449121	0.348142	0.59949	0.421489	0.163947	0.371424	0.586184	0.369689
		0.589697	0.678279	0.647834	0	0.545224	0	0.557015	0.454039	0.610108	0
		0.690149	0.653193	0.501237	0.224453	0.592034	0	0.506319	0.327133	0.654527	0.345822
		0.494068	0.611553	0.612559	0.135477	0.591115	0	0.60692	0.359128	0.530068	0
		0.621598	0.699869	0.60686	0.187622	0.591726	0	0.490447	0	0.668728	0.496663
		0.666196	0.461697	0.573938	0.36469	0.670595	0	0.556285	0.386993	0.729016	0.322878
		0.71142	0.621604	0.627808	0.442972	0.42899	0.548804	0.610122	0	0.512287	0
		0.676198	0.563451	0.66355	0.495828	0.677744	0	0.586757	0.395346	0.522732	0.253132
		0.626043	0.237821	0.504276	0	0.68083	0.378562	0.525273	0.290951	0.589609	0
		0.705775	0.491339	0.349939	0	0.679355	0	0.555253	0	0.702749	0.116849
		0.761354	1.38369	0.6131	0	0.647615	0.482227	0.582394	0.432954	0.595745	0
		0.78379	0.529962	0.604968	0.193079	0.666614	0	0.567655	0	0.574077	0.432655
		0.730923	0.569238	0.38857	0.188655	0.608981	0.379493	0.706893	0.353142	0.66062	0
		0.61018	0.677466	0.596292	0.403274	0.402728	0.549086	0.650228	0.345841	0.660183	0.502683
		0.547133	0.551581	0.482654	0.420826	0.699127	0.617862	0.641293	0.357762	0.713518	0.23143
		0.624128	0.719074	0.659305	0.351924	0.701291	0	0.548961	0.326745	0.728336	0.04977
		0.793416	0.64652	0.382252	0	0.634393	0.266764	0.563932	0.247899	0.676112	0.534109
		0.568619	0.595495	0.521638	0	0.46353	0.167492	0.434684	0.43258	0.661297	0.254869
		0.690546	0.599368	0.238527	0.314139	0.642952	0.369939	0.666332	0.260116	0.640011	0.484177
		0.713573	0.230529	0.630799	0.221235	0.764272	0	0.471071	0.187936	0.648595	0.380871
		0.734199	0.636401	0.539516	0.259071	0.638653	0.51158	0.518015	0.269383	0.561021	0.546165
		0.676034	0.685733	0.584121	0.368358	0.672883	0	0.560718	0.494826	0.598259	0
		0.642186	0.651176	0.593687	0.408428	0.599277	0	0.61647	0	0.606595	0.351504
		0.657098	0.674668	0.441739	0.438308	0.4541	0	0.690271	0.543424	0.607974	0
		0.672576	0.577562	0.546826	0.273751	0.54454	0.206971	0.552834	0	0.609534	0.355325
		0.749325	0.454283	0.58765	0	0.547445	0	0.507089	0	0.684927	0.329167
		0.742562	0.649254	0.567524	0.504661	0.439877	0	0.579148	0.276198	0.621735	1.35713
		0.622268	0	0.501193	0	0.571417	0	0.544796	0	0.712039	0.310769
		0.596558	0.494516	0.648093	0.36942	0.71233	0.163659	0.599219	0	0.729879	0
		0.658082	0.59777	0.550866	0.166712	0.567426	0	0.576219	0	0.571128	0.272637
		0.69426	0.621732	0.555762	0.450091	0.572689	0	0.579666	0	0.661586	0.489198
		0.63232	0	0.550089	0	0.64891	0	0.629588	0.351844	0.67886	0
		0.879798	0.271767	0.242733	0.413303	0.487003	0	0.577793	0	0.648361	0.324889
		0.634862	0.396114	0.490801	0	0.525077	0.42509	0.544714	0	0.630521	0.347729
		0.616977	0.680595	0.484685	0	0.615828	0.256996	0.585231	0	0.593211	0.383645
		0.72444	0	0.545492	0.378663	0.494879	0	0.681262	0.26831	0.620962	0.572339
		0.691833	0.289128	0.639527	0.305423	0.873661	0	0.665642	0	0.58118	0.508669
		0.594	0.637589	0.590697	0	0.364152	0	0.61638	0	0.597269	0
		0.787138	0.60892	0.599429	0.160341	0.657862	0	0.485582	0.353228	0.615268	0.459158
		0.637061	0.305486	0.575837	0.397562	0.642219	0.309601	0.545318	0	0.646506	0
		0.731879	0.714077	0.568045	0.327282	0.619127	0	0.650646	0.212507	0.693882	0.368314
		0.639102	0.518919	0.487049	0.402609	0.580582	0.091319	0.589556	0.477846	0.50178	0.303067
		0.620822	0.59937	0.744638	0	0.585628	0	0.620435	0.495572	0.70142	0.330289
		0.470853	0	0.644697	0.370771	0.702851	0	0.556816	0.038065	0.674506	0.461599
		0.631523	0.226786	0.495277	0.435524	0.795762	0	0.551684	0	0.648697	0.566593
		0.798489	0.497608	0.428927	0	0.409149	0	0.633472	0.377373	0.671584	0.843725
		0.706504	1.09751	0.472592	0.237771	0.648227	0	0.603655	0	0.630241	0
		0.703182	0.573786	0.708313	0.364518	0.537771	0	0.575374	0	0.626541	0
		0.641696	0.629061	0.546768	0	0.51949	0.293008	0.568338	0.551822	0.58326	0.526125
		0.681969	0.385372	0.593868	0.309742	0.85225	0	0.578609	0.265448	0.639488	0.232816
		0.623187	0.66218	0.494113	0	0.632103	0	0.499381	0.211071	0.668997	0
		0.733493	0.458589	0.511873	0	0.5264	0.310547	0.669908	0	0.620765	0
		0.608401	0.666812	0.580322	0	0.483467	0.292061	0.623831	0.568448	0.662604	0
		0.622326	0.512888	0.594338	0.447103	0.684018	0.67338	0	0.378601	0.700933	0.58321
		0.547135	0.467819	0.551624	0.419781	0.547586	0	0.643741	0.310081	0.56648	0
		0.684321	0.750343	0.581553	0.412323	0.488394	0.230357	0.591977	0.447877	0.667755	0.34427
		0.534259	0.584387	0.543715	0.178258	0.591178	0	0.43655	0.406419	0.647682	0.40433
		0.663062	0.503368	0.564005	0	0.673767	0.625265	0.572636	0	0.516972	0.324123
		0.650919	0	0.531658	0.403385	0.602896	0.40694	0.589375	0	0.949528	0.325857
		0.71027	0.58861	0.611493	0	0.527552	0	0.62203	0.504226	0.669595	0
		0.65989	0.509222	0.588937	0.2574	0.862707	0	0.611716	0.319017	0.646092	0.264728
		0.697119	0.617063	0.5569	0.133824	0.450477	0	0.634307	0.376749	0.717921	0
		0.6961	0.534314	0.471958	0.21872	0.474105	0	0.549039	0.200929	0.609783	0.465138
		0.707642	0	0.446753	0.35923	0.371007	0	0.606437	0.411829	0.676244	0.342817
		0.624768	0.687784	0.482926	0.362966	0.600089	0	0.205631	0.285947	0.627618	0
		0.61703	0.422775	0.501134	0.386304	0.654932	0	0.577066	0.347847	0.872134	0.534526
		0.709598	0.696494	0.468019	0.404793	0.626484	0	0.400211	0.483597	0.733096	0
		0.730519	0.83942	0.556922	0.674292	0.567884	0.583727	0.63783	0.572605	0.63607	0.344657
		0.769258	0	0.57703	0.234499	0.643123	0	0.671516	0.397577	0.701386	0
		0.852393	0.709693	0.640547	0.394987	0.516691	0	0.586436	0	0.606533	0.341731
		0.628748	0.730785	0.548358	0.380883	0.580764	0	0.511346	0.314466	0.665701	0
		0.614408	0	0.526851	0.196616	0.629248	0	0.56606	0	0.670923	0.504572
		0.642732	0.585889	0.563028	0	0.819625	0.273129	0.533757	0.33021	0.669747	0.356425
		0.707713	0.735516	0.592522	0	0.691302	0	0.389089	0.391878	0.768682	0.323542
		0.684363	0.681505	0.570408	0.11183	0.607571	0.15269	0.58661	0.216199	0.56284	0.336706
		0.71601	0.61634	0.353452	0.473527	0.59175	0	0.65546	0.435833	0.575888	0.49058
		0.559018	0.663892	0.56908	0.342323	0.587658	0	0.595889	0.405011	0.605817	0.534058
		0.716536	0.545168	0.543378	0.432153	0.557484	0.183153	0	0.369383	0.548834	0.544697
		0.596836	0.522749	0.492964	0	0.639528	0	0.624476	0.190719	0.637711	0.29005
		0.794647	0.437663	0.664683	0.19106	0.503235	0	0.534368	0.377952	0.815062	0
		0.662351	0.512013	0.61516	0	0.585085	0.28272	0.49604	0.197502	0.621344	0.320455
		0.654678	0.561904	0.620538	0.517309	0.712984	0.706424	0.633396	0.534912	0.652899	0.449555
		0.668082	0.493504	0.498549	0	0.26841	0	0.648607	0.179062	0.692579	0.295209
		0.596894	0.740778	0.53256	0.270032	0.218627	0	0.494948	0	0.619387	0.251135
		0.57286	0.57735	0.535253	0.317396	0.566672	0.527621	0.618651	0.278035	0.687459	0.263656
		0.70169	0.539477	0.629357	0.275042	0.550376	0	0.602408	0.280238	0.620751	0
		0.635567	0.775081	0.631047	0.308816	0.653863	0	0.66404	0.311962	0.550592	0
		0.663628	0.382922	0.552559	0	0.708764	0	0.584952	0	0.63779	0
		0.647435	0.380136	0.528856	0.542999	0.359521	0.121989	0.374225	0	0.697766	0
		0.475854	0.53376	0.644147	0	0.661782	0.279699	0.504813	0	0.445766	0
		0.677035	0.704631	0.603125	0	0.593524	0.488966	0.479271	0.43798	0.608717	0.508326
		0.586146	0.307175	0.625817	0.329424	0.652368	0	0.575644	0.525659	0.704398	0
		0.679208	0.538547	0.435536	0	0.764007	0	0.586109	0.249343	0.703466	0
		0.665811	0.746515	0.607255	0.375679	0.550868	0	0.267829	0.420506	0.492405	0.243407
		0.674879	0.705761	0.563898	0	0.725106	0	0.737324	0	0.692453	0.362792
		0.647067	0.625471	0.5333	0	0.719782	0	0.612829	0.579742	0.590192	0.461562
		0.550086	0.71153	0.553072	0.511841	0.504706	0	0.640274	0	0.597308	0.186196
		0.686513	0.580488	0.563321	0.338128	0.497224	0	0.33836	0	0.690132	0
		0.678562	0.247743	0.571397	0.531345	0.575526	0	0.594113	0	0.581651	0.40734
		0.763633	0.583006	0.513958	0.335656	0.570981	0.339479	0	0	0.676572	0.580221
		0.669012	0.673656	0.582993	0.251143	0.63156	0	0.307711	0	0.612372	0.108002
		0.702373	0.548207	0.525806	0	0.682686	0	0.647113	0	0.641466	0
		0.686287	0.539587	0.504059	0	0.610848	0.42623	0.636134	0	0.550135	0.509647
		0.902948	0.661609	0.595192	0.331599	0.67043	0.516412	0.373588	0.535693	0.769942	0.480372
		0.639491	0.704158	0.502379	0.369649	0.578252	0.490749	0.546919	0.340844	0.704112	0.287161
		0.666166	0.433645	0.606899	0.396993	0.648017	0.363606	0.70047	0.367976	0.470378	0.417744
		0.693017	0.340268	0.636385	0.338869	0.565837	0.26569	0.453794	0.23613	0.708518	0.478925
		0.581256	0.570354	0.55502	0.306243	0.648549	0	0.676196	0.526086	0.641131	0
		0.673971	0.729891	0.548759	0.373813	0.58621	0.519146	0.626228	0	0.677649	0.422852
		0.645154	0.67421	0.452156	0.105898	0.630004	0	0.530069	0.0965	0.597198	0
		0.648787	0.593899	0.595402	0.293494	0.687741	0	0.615295	0	0.614641	0
		0.734251	0.506683	0.524808	0.328186	0.625626	0.527172	0.581822	0	0.639334	0.257971
		0.628122	0.573784	0.475717	0.407386	0.597865	0	0.507174	0.356777	1.20056	0.478649
		0.783879	0.577763	0.676817	0.363102	0.51796	0.481806	0.377648	0.246243	0.762428	0
		0.667248	0.683688	0.609819	0	0.612659	0	0.612846	0	0.535502	0
		0.640889	0.761787	0.584443	0.395924	0.776358	0.123041	0.677388	0	0.705328	0.152388
		0.6653	0.565758	0.540991	0.41885	0.671402	0	0.297562	0.600408	0.562233	0
		0.694186	0.643951	0.561951	0.371965	0.667635	0	0.319801	0.557025	0.236309	0.392129
		0.662553	0.558397	0.582554	0	0.657795	0.399529	0.606921	0	0.713618	0
		0.646139	0.485991	0.584617	0.425341	0.655528	0.404345	0.598746	0.315172	0.562141	0
		0.646507	0.243783	0.530794	0.438015	0.456666	0.20876	0.16469	0	0.676957	0.220765
		0.74912	0.580565	0.682635	0	0.690413	0	0.584265	0	0.588678	0.391371
		0.659159	0.670637	0.505932	0.291971	0.583575	0	0.532442	0.342881	0.698116	0
		0.68802	0.722564	0	0	0.528107	0	0.525948	0	0.639738	0
		0.620127	0.531689	0.7122	0.290835	0.641954	0	0.543123	0	0.203008	0.199433
		0.621658	0.511102	0.590188	0.313592	0.653489	0.287857	0.464894	0	0.631386	0.502494
		0.609679	0.64391	0.605152	0.305837	0.608536	0	0.571747	0.259342	0.618067	0.31716
		0.602137	0.4074	0.37583	0.303584	0.598813	0	0.606614	0.468164	0.526937	0.381771
		0.694076	0.608949	0.603008	0	0.66632	0	0.640274	0.247286	0.785306	0.35976
		0.645491	0.60732	0.548602	0.223896	0.651981	0	0.504708	0.394044	0.650488	0.627123
		0.651889	0.64922	0.750044	0.373294	0.561404	0.307002	0.522003	0	0.715894	0.599309
		0.674004	0.683746	0.529534	0.338764	0.364551	0	0.522004	0	0.650546	0.379973
		0.680499	0.709201	0.565842	0.076214	0.612495	0.500265	0.644538	0.382317	0.78902	0
		0.634443	0.630041	0	0.097861	0.638457	0	0.552609	0.225799	0.492209	0.667874
		0.715266	0.75117	0.62214	0.300125	0.523424	0.439871	0.633428	0.314439	0.625983	0.251294
		0.631399	0.658015	0.564724	0.269818	0.682021	0	0	0.4195	0.621768	0.451835
		0.610527	0.524106	0.673883	0	0.755019	0	0.600786	0.532758	0.574371	0.267238
		0.800879	0.22674	0.854305	0.366713	0.68979	0.498353	0.517136	0.326188	0.664074	0
		0.622691	0.624784	0.527109	0	0.267232	0	0.538865	0.675989	0.62114
		0.689921	0.454793	0.510382	0	0.687859	0.450077	0.673633	0.373405	0.654508
		0.66194	0.593693	0.624658	0.484563	0.603445	0	0.652175	0.263694	0.56448
		0.491034	0.201027	0.588738	0.406108	0.212023	0.447934	0.638343	0.662001	0.662579
		0.283541	0.631149	0.581867	0.575674	0.560712	0.302607	0.664275	0	0.700593
		0.697815	0.192617	0.105372	0.302901	0.691782	0	0	0.365814	0.572294
		0.785432	0	0.549303	0	0.691519	0.493213	0.66551	0.242728	0.666879
		0.663618	0.723854	0.56179	0.13387	0.680292	0.344668	0.522985	0.475271	0.68555
		0.691236	0.718478	0.534149	0	0.472872	0	0.487333	0.367016	0.632733
		0.674542	0.452848	0.699725	0.329523	0	0.337058	0	0	0.599666
		0.618141	0.739541	0.45477	0.322059	0.632242	0	0.707423	0	0.598558
		0.583445	0.628287	0.529513	0	0.515526	0	0.582801	0	0.621099
		0.669324	0.686763	0.616913	0	0.641234	0.264889	0.557955	0.228966	0.632241
		0.784335	0	0.624588	0	0.713771	0.50855	0.528794	0	0.743079
		0.626171	0.544205	0.526655	0	0.591943	0	0.563722	0	0.669842
		0.647169	0.275362	0.52908	0.480098	0.51479	0.078235	0.385267	0.190065	0.731529
		0.70801	0.693028	0.562451	0.342201	0.590419	0	0.670544	0.407992	0.692364
		0.775864	0.486071	0.633944	0.382775	0.669857	0.514538	0.674786	0.539229	0.663339
		0.751986	0.623974	0.57826	0	0.515723	0.387547	0.341562	0	0.612975
		0.660356	0	0.580212	0.34077	0	0.546105	0.450674	0	0.635752
		0.673696	0.424439	0.445074	0.040652	0.656288	0	0.711174	0.425407	0.742133
		0.59846	0.577116	0.545021	0.321847	0.669796	0	0.441119	0.510356	0.615602
		0.778725	0.573289	0.446941	0	0.541497	0	0.602448	0
		0.538126	0.529795	0.560825	0.225976	0.46146	0	0.554402	0
		0.699577	0.562361	0.604207	0	0.593991	0	0.466921	0.390341
		0.662757	0.709914	0.63199	0.177905	0.54945	0.469296	0.628714	0.212572
		0.60082	0.487148	0.461476	0	0.694109	0	0.629003	0.433317
		0.77236	0.622014	0.597511	0.183991	0.656682	0	0.56601	0.17273
		0.699118	0.654505	0.609968	0.157402	0.452537	0	0.6552	0
		0.620597	0.556374	0.590769	0.404332	0.631799	0	0.630003	0.349219
		0.643872	0.1421	0.523822	0.424293	0.618305	0	0.621705	0.301615
		0.715194	0.491324	0.55433	0.369286	0.749918	0	0.380001	0
		0.759551	0.642004	0.514363	0.237359	0	0	0.563917	0
		0.82829	0.672979	0.664796	0.374761	0.412655	0.205018	0.639085	0.326388
		0.598613	0	0.678419	0.366994	0.585463	0	0.461646	0.369954
		0.740749	0.620052	0.506688	0.300471	0.66797	0.210986	0.478205	0
		0.685598	0.675188	0.429985	0.2911	0.624704	0	0.532272	0.1732
		0.604549	0.515048	0.695451	0.391899	0.566336	0	0.16146	0
		0.806535	0.424576	0.540573	0.303563	0.597604	0	0.50411	0.565177
		0.666995	0.510573	0.589038	0.453805	0	0	0.294989	0.315992
		0.640437	0.550823	0.552739	0.426805	0.463843	0.526764	0.56085	0.368774
		0.711983	0.53676	0.603677	0	0.577293	0.477616	0.49979	0.300866
		0.532795	0.599139	0.514071	0.503518	0.560748	0	0.584254	0.475107
		0.632291	0.556773	0.557731	0	0.540679	0	0.572851	0.392445
		0.747138	0.637746	0.315438	0.360599	0.630707	0	0.690658	0.317284
		0.580376	0	0.501852	0	0.404514	0	0.702451	0.33077
		0.639199	0.609007	0.454562	0.434625	0.637936	0	0.516419	0.473562
		0.681667	0.256911	0.536295	0.425731	0.722965	0.771985	0.71244	0
		0.634144	0.617925	0.383535	0.502681	0.748919	0.544932	0.607344	0
		0.661767	0	0.529895	0.35571	0.633516	0.448986	0.663671	0
		0.601092	0	0.574493	0	0.495472	0.252665	0.627575	0
		0.674168	0.373148	0.608382	0.393646	0.392204	0	0.595214	0
		0.687958	0.602438	0.522562	0.266303	0.648199	0	0.563668	0.337379
		0.663795	0.583345	0.548734	0.300698	0.537015	0	0.578667	0
		0.819634	0.467931	0.538838	0	0.675704	0	0.585415	0.221268
		0.626424	0.416211	0.643985	0	0.63402	0	0.571042	0.346198
		0.802578	0.561648	0.632733	0	0.565585	0.419427	0.535656	0.306064
		0.646061	0.684554	0.627643	0.520075	0.735855	0	0.62145	0.315404
		0.623138	0.597861	0.532577	0.528665	0.678328	0	0.582517	0.37226
		0.868758	0.628468	0.592211	0.385843	0.489238	0.388428	0.595159	0
		0.683652	0.642233	0.200743	0.399409	0.58556	0	0.574828	0.525319
		0.739507	0.621461	0.565527	0	0.603822	0	0.394491	0.207385
		0.651675	0.6488	0.545589	0.479482	0.454963	0	0.533716	0.395615
		0.74477	0.650204	0.58686	0.274504	0.622594	0.273096	0	0.475114
		0.64156	0.598523	0.430556	0	0.474805	0	0.440734	0
		0.717767	0.676793	0.505606	0.402	0.68627	0.551837	0.582741	0.148108
		0.656368	0	0.568102	0.391921	0.667868	0.478291	0.669073	0.548934
		0.772507	0.661727	0.564551	0.339401	0.594986	0	0.455479	0.448171
		0.671264	0	0.495151	0.401207	0.65502	0.291202	0.469328	0
		0.625722	0.908522	0.529571	0.230192	0.421812	0	0.535291	0.600336
		0.777809	0.673572	0.679072	0.49695	0.484874	0	0.671504	0.164431
		0.795986	0.578164	0.446024	0.339308	0.552881	0	0.508388	0.373448
		0.733698	0.671092	0.610047	0	0.606365	0.321901	0.567362	0.347775
		0.652816	0.574587	0.588822	0.394747	0.912554	0.353509	0.596715	0.257018
		0.801382	0.750626	0.573812	0.218295	0.634183	0	0.577504	0.381386
		0	0.674378	0.508354	0.272182	0.42833	0.28313	0.604015	0.196678
		0.656436	0.453873	0	0.558196	0.646429	0.366789	0.644509	0.238253
		0.662048	1.13164	0	0.334421	0.669583	0	0.544552	0
		0.732886	0.208649	0.523945	0	0.599486	0	0.556266	0.30775
		0.635156	0.613305	0.633884	0.189685	0.751682	0.520076	0.603241	0
		0.683528	0.717565	0.550023	0.388094	0.693973	0.594668	0.685635	0
		0.703698	0.487636	0.555013	0.417448	0.59375	0	0	0.312926
		0.618884	0.591914	0.490257	0.362637	0.687003	0.400243	0.207601	0.354969
		0.701835	0.668443	0.487187	0.322014	0.497612	0	0.661534	0.322592
		0.631096	0.664251	0.446638	0	0.614405	0	0.553186	0.500129
		0.773191	0.662685	0.425187	0.359315	0.792319	0	0.485274	0
		0.846152	0.644727	0.533487	0	0.433459	0	0.727876	0.162343
		0.609294	0.513989	0.652086	0.165244	0.62022	0.399261	0.606261	0.473717
		0.725985	0.594057	0.550055	0.511689	0.33336	0	0.533021	0
		0.657524	0.540372	0.653611	0.256896	0.519434	0.347778	0.427164	0.495326
		0.605403	0.594313	0.703898	0.361333	0.609315	0.447723	0.479962	0.269768
		0.707099	0.834573	0.616452	0.172108	0.549272	0	0.558712	0.429044
		0.737592	0.720716	0.407359	0.435068	0.585135	0.25052	0	0
		0.682043	0.571184	0.560404	0.299749	0.609111	0	0.628981	0
		0.485509	0.656403	0.596301	0.343704	0.444188	0	0.544438	0
		0.623965	0.573676	0.452051	0.401306	0.612575	0.286054	0.552595	0.540381
		0.719072	0.692678	0.616376	0	0.564379	0	0.485992	0.355207
		0.626285	0	0.550681	0.361518	0.580658	0.477126	0.603989	0.396813
		0.635146	0.680972	0.582706	0	0.726914	0.332174	0.295527	0.299442
		0.596874	0.674419	0.611134	0	0.453181	0.289335	0.438823	0.189427
		0.703991	0.608466	0.484102	0.316455	0.578808	0.639914	0.60715	0.303286
		0.627655	0.698974	0.615063	0.294313	0.558785	0.448537	0.607762	0.21537
		0.635285	0.633232	0.606938	0.256793	0.750882	0.381905	0.664899	0.564598
		0.687088	0.656062	0.502389	0.462092	0.590452	0.448427	0.532096	0.444064
		0.48627	0.589463	0.515335	0.440319	0.658579	0	0.668607	0
		0.601447	0.577407	0.664524	0.3235	0.704689	0	0.577891	0.524841
		0.705757	0.71037	0.500885	0.501004	0.559312	0	0.552911	0.063972
		0.78644	0.562536	0.547561	0.379866	0.702981	0.456698	0.610905	0.272401
		0.794762	0.623124	0.533168	0.266607	0.653723	0	0.573924	0.480679
		0.804692	0.633481	0.542145	0.600312	0.637971	0	0.616498	0.329314
		0.663246	0.622565	0.599228	0.385809	0.65706	0.103169	0.419292	0
		0.283534	0.514655	0.645117	0.274044	0.563792	0	0.630394	0.465642
		0.581005	0.687082	0.52778	0.532508	0.650304	0.154045	0.526031	0
		0.639434	0.796926	0.516419	0.179645	0.670201	0.517923	0.652409	0
		0.635911	0.634239	0.654939	0	0.671863	0	0.506523	0.336982
		0.648191	0.689647	0.490846	0	0.706675	0.482084	0.645181	0
		0.647926	0.633962	0.526031	0.615935	0.57887	0	0.588168	0
		0.709164	0.567721	0.590011	0.482308	0.619847	0	0.671436	0.152408
		0.790415	0.6845	0.599318	0.392627	0.508072	0.324955	0.621886	0.330846
		0.737354	0.565887	0.609374	0.426974	0.440563	0	0.573134	0
		0.718936	0.421391	0	0.529643	0.647214	0	0.620744	0.240824
		0.617107	0.642707	0.679831	0	0.491748	0	0.70154	0.340026
		0.586894	0.652435	0.40684	0.212096	0.527622	0.271082	0.580141	0.254865
		0.603628	0.379862	0.641136	0.344366	0.569362	0.090854	0.252434	0
		0.748866	0.519904	0.535488	0.314487	0.703401	0.41036	0.576799	0.331098
		0.491519	0.588442	0.594893	0	0.757836	0	0.357694	0.493181
		0.647532	0.578238	0.571385	0.29376	0.704684	0.235998	0.303951	0.206692
		0.632398	0.540331	0.409856	0.374726	0.53024	0.64849	0.467184	0.364552
		0.641272	0.15618	0.637989	0.370757	0.532715	0.367596	0.548398	0.580214
		0.665624	0.630041	0.597789	0.596227	0.607967	0	0.668728	0
		0.68974	0.556062	0.514571	0.292309	0.591199	0	0.658546	0.520597
		0.732811	0.6533	0.471403	0	0.624852	0.620608	0.231365	0.505869
		0.652026	0.631015	0.557558	0.422256	0.634754	0	0.512885	0.436052
		0.618275	0.692462	0.581706	0	0.699926	0.320171	0.566372	0.553488
		0.711248	0.550036	0.404505	0.286337	0.598265	0.183735	0.507729	0
		0.684898	0.649378	0.535626	0.451752	0.390246	0.464397	0.574376	0.496028
		0.589001	0	0.382205	0.156111	0.567097	0	0.763763	0
		0.679366	0.605374	0.658066	0.475494	0.319443	0	0.599411	0.278884
		0.764166	0.615209	0	0.387585	0.336986	0	0	0
		0.619074	0.512343	0.577142	0	0.663857	0.494517	0.707946	0.378466
		0.715593	0.536648	0.563853	0.299972	0.578184	0	0.619693	0
		0.632265	0.576485	0.539311	0.167171	0.514735	0	0.56486	0.393489
		0.624817	0.648359	0.251126	0.395434	0.624662	0	0.599847	0.484741
		0.659406	0.22722	0.546372	0.301354	0.677134	0.534531	0.626849	0.23531
		0.685918	0.584953	0.509942	0	0.664403	0.269592	0.543849	0.271624
		0.609551	0.244793	0.555644	0	0.695546	0	0.565221	0.465074
		0.602871	0.684973	0.584039	0.274502	0.722159	0	0.495482	0.312788
		0.60573	0.70587	0.514356	0.391361	0.723363	0.331544	0.456517	0
		0.712865	0.547506	0.586561	0.337238	0.685183	0.245855	0.548978	0.352435
		0.792393	0.467701	0.62266	0.231542	0.349219	0	0.538788	0
		0.630922	0.48177	0.569485	0	0.584183	0	0.284631	0
		0.739463	0.454621	0.589486	0	0.572377	0	0.624127	0.341963
		0.698483	0.677625	0.577541	0	0.548055	0	0.561411	0
		0.502105	0.487406	0.635996	0.41992	0.428589	0	0.551733	0.341672
		0.686393	0.615204	0.620207	0	0.645832	0	0.506489	0.250335
		0.656738	0.521074	0.565964	0.478607	0.487784	0	0.51082	0
		0.604225	0.724243	0.479039	0.223869	0.7024	0.375334	0.25973	0.376386
		0.467277	0.328439	0.469063	0.397986	0.548124	0.283839	0.62399	0.498591
		0.668156	0.640215	0.6179	0	0.748573	0	0.762983	0.376541
		0.701791	0.710207	0.547987	0.378801	0.710783	0.205086	0.584437	0
		0.259043	0.521247	0.592927	0.388919	0.643685	0	0.560222	0
		0.701011	0.558972	0.470516	0.214202	0.727196	0	0.663323	0
		0.817049	0	0.643552	0.467839	0.575276	0	0.70371	0.433231
		0.654765	0.614938	0.562195	0.457986	0.461243	0.636467	0.628502	0.240987
		0.710295	0.498662	0.625825	0.397121	0.552707	0.609907	0.680269	0.451827
		0.68621	0.679757	0.508088	0	0.279002	0.408334	0.594155	0
		0.709595	0.751289	0.572747	0.37997	0.519223	0	0.582068	0.422858
		0.632455	0.589063	0.527787	0	0.678336	0.391372	0.611124	0.482591
		0.674306	0.692296	0.673293	0.276794	0.389439	0	0.323561	0.22848
		0.62721	0	0.559162	0.359994	0.544932	0	0.541026	0.453534
		0.710375	0.120962	0.515289	0.27527	0.662913	0.512343	0.587133	0.252518
		0.641323	0	0.504694	0	0.661433	0	0.652923	0.251408
		0.62703	0.375909	0.581682	0.128216	0.665747	0	0.478288	0.468076
		0.667681	0.731992	0.649761	0.326703	0.640596	0	0.425587	0.340095
		0.691127	0.17536	0.546125	0.462077	0.504939	0.126199	0.535868	0
		0.725944	0.634597	0.597339	0.208668	0.612394	0	0.270537	0.341432
		0.624165	0.517253	0	0.500908	0.539705	0.64062	0.617751	0.383094
		0.615463	0.559187	0.472216	0	0.399211	0	0.699098	0.377877
		0.640699	0.535474	0.482166	0.212654	0	0	0.609092	0.310362
		0.662866	0.630252	0.535777	0.323339	0	0	0.468806	0.214536
		0.632484	0.649593	0.617988	0.39432	0.643698	0.434119	0.400848	0.378847
		0.58432	0.503071	0.530565	0.414826	0.590687	0.357778	0.611906	0.30093
		0.574307	0	0.609017	0.280793	0.599251	0.459947	0.475756	0
		0.643816	0.623036	0.588671	0.434579	0.354276	0	0.579856	0
		0.693701	0	0	0.498421	0.482132	0.168164	0.628679	0.14276
		0.669671	0.374209	0.549626	0.152589	0.590416	0.537011	0.662689	0.419365
		0.647407	0.783865	0.600826	0	0.383656	0	0.643838	0.272813
		0.751459	0.802421	0.523979	0.419289	0.671038	0.171815	0.549479	0
		0.704097	0.494934	0.488078	0	0.529667	0	0.638825	0
		0.747921	0.635012	0.594739	0	0.605312	0	0.548755	0
		0.592059	0.597008	0.576261	0.311238	0.588294	0.444566	0.685378	0.658664
		0.741016	0.638868	0.597403	0.333825	0	0	0.580584	0
		0.643848	0	0.694506	0.496632	0.682655	0	0.605174	0
		0.659836	0.594562	0.515982	0	0.690318	0.313878	0.568451	0
		0.699833	0.59121	0.187899	0.176381	0	0	0.464797	0
		0.642204	0.560957	0.56786	0.31829	0.150937	0	0	0.345221
		0.62622	0.598086	0.59023	0.365638	0.673356	0	0.644857	0.33689
		0.330361	0.438891	0.547602	0	0.560813	0.33304	0.547745	0
		0.527768	0.410649	0.619315	0.443222	0.333544	0	0.635109	0.22065
		0.602563	0.582654	0.575986	0	0.603178	0	0.6265	0.511533
		0.650544	0.317378	0.557742	0.411882	0.378604	0	0.588407	0
		0.733576	0.671505	0.613831	0.117695	0.536935	0	0.545171	0.371975
		0.574954	0.308785	0.588517	0.397821	0.783265	0.365949	0.561378	0.502977
		0.679596	0.518236	0.550857	0.31582	0.552638	0.101576	0.628514	0.339667
		0.616504	0.556619	0.635209	0.187142	0.615095	0.619094	0.603213	0.284863
		0.638481	0.735799	0	0.428569	0.762749	0.537354	0.447706	0.485633
		0.284716	0.698369	0.549638	0.399217	0.600846	0.155989	0.545497	0.351068
		0.709651	0.248172	0.427319	0	0.583401	0.249723	0.435651	0
		0.576126	0.515362	0.593682	0	0.671196	0.428872	0.620282	0.31733
		0.679702	0.617581	0.492392	0	0.5421	0	0	0.472007
		0.672971	0.468204	0.697036	0.230315	0.565936	0	0.599614	0
		0.723281	0.267795	0.614764	0.469475	0.620256	0	0.493654	0.320938
		0.634631	0.625856	0.59463	0.299501	0.502406	0.621	0.599294	0.277687
		0.736912	0.485573	0.658626	0	0.50896	0	0.587705	0.349603
		0.6938	0.578777	0.613752	0.376175	0.435958	0.375219	0.641777	0.356437
		0.627743	0.597826	0.581178	0.323075	0.442135	0.363889	0.566788	0.125904
		0.619469	0.620257	0.597576	0.076854	0.643366	0.052862	0.508175	0.313911
		0.727708	0.600296	0.54656	0	0.523799	0	0.368796	0.389448
		0.694601	0.630867	0.584862	0	0.53963	0.502735	0.586933	0
		0.633068	0.619551	0.653822	0.528214	0.584459	0.154158	0.555976	0.321023
		0.764311	0.419268	0.551163	0.157566	0.594848	0.375671	0.555013	0.214072
		0.648398	0.617795	0.529992	0.282163	0.328513	0.48037	0.573004	0
		0.691729	0.631088	0.578672	0	0.591186	0.297168	0.585606	0
		0.495676	0.623668	0.640708	0.126406	0.618537	0.235887	0.689838	0
		0.674636	0.640216	0.575153	0.350773	0.756908	0	0.539428	0.306779
		0.618214	0.459696	0.643277	0.318597	0.559043	0.367709	0.567108	0
		0.677223	0.651488	0.517459	0.362544	0.599962	0	0.515833	0.946942
		0.676304	0.538257	0.70786	0.350754	0.473059	0	0.581812	0.312219
		0.738621	0.687833	0.269163	0	0.68024	0.639738	0.638416	0
		0.633611	0.616116	0.587171	0	0.475359	0	0.439724	0
		0.603226	0.644939	0.601935	0.235142	0.4196	0	0.380705	0.351262
		0.634429	0.360519	0.430957	0.256724	0.647093	0	0.515345	0.3
		0.509017	0.737619	0.611464	0	0.519826	0	0.603337	0.379246
		0.665084	0.679763	0.537941	0.378302	0.545183	0	0.644988	0.568408
		0.716397	0.577941	0.60271	0.321775	0.398936	0	0.694799	0
		0.484702	0.275861	0.50898	0	0.562566	0.434021	0.59936	0.431879
		0.750778	0.255085	0.580476	0	0.623105	0.390089	0.459156	0
		0.692985	0.634913	0.401804	0.457098	0.709269	0	0.309615	0.348009
		0.540251	0.327641	0.594744	0.392682	0.477496	0	0.565997	0
		0.652424	0.695067	0.602356	0.327428	0	0.26521	0	0
		0.586113	0.648284	0.616737	0.234373	0.543121	0	0.219024	0.335433
		0.679309	0.71945	0.488789	0	0.665432	0	0.538026	0.120025
		1.32947	0.556951	0	0.420102	0.526239	0	0.53565	0
		0.587782	0.581498	0.593467	0.371845	0.581088	0.397229	0.54916	0
		0.675342	0.639434	0.564232	0.455917	0.603819	0.462648	0.574989	0.239968
		0.65991	0.561478	0.57835	0.207005	0.541548	0.293733	0.672902	0
		0.983435	0.577107	0.662193	0	0.366526	0.292506	0.649124	0.408895
		0.542305	0.506286	0.503918	0.369698	0.761398	0.326428	0.574086	0.508333
		0.716532	0	0.607476	0	0.325405	0	0.516541	0.371986
		0.686507	0	0.566065	0.170247	0.624981	0	0.517935	0.354576
		0.696781	0.728494	0.561019	0.348358	0.670434	0.539385	0.349136	0.319937
		0.687955	0.534481	0.427068	0.350636	0.711159	0	0.653801	0.284584
		0.622556	0.580227	0.622424	0.20256	0.720136	0	0	0
		0.638767	0.612257	0.517154	0.44048	0.30778	0.393632	0.45346	0.395559
		0.64182	0.663482	0.569772	0.282232	0.389185	0	0.62713	0.343705
		0.622558	0	0.498401	0	0.649254	0.434588	0.605318	0
		0.689552	0.374644	0.471708	0	0.439459	0	0.632176	0.248305
		0.632297	0.574147	0.563495	0	0.602092	0	0.591419	0.261441
		0.654992	0.654286	0.502953	0	0.628968	0	0.553209	0.400303
		0.66438	0.862672	0.445094	0.311779	0.634591	0.460856	0.558226	0.245483
		0.635838	1.03824	0.601542	0	0.530418	0.278376	0.53772
		0.669455	0.642792	0.635027	0	0.51385	0.143335	0.380407
		0.679304	0.834879	0.704557	0.197228	0.645146	0	0.568414
		0.676969	0.369228	0.58232	0.458608	0.555499	0	0.638106
		0.760253	0.666565	0.649394	0.340348	0.721283	0.230933	0.709047
		0.596791	0.642325	0.541377	0.140674	0.603247	0.177819	0.53965
		0.601366	0.663128	0.6564	0	0.675403	0.508147	0.25598
		0.664863	0.594413	0.600178	0.28921	0.670881	0	0.581512
		0.616992	0.618675	0.576476	0.368906	0.67914	0.459511	0.604831
		0.772084	0.368106	0.558627	0	0.679957	0.273875	0.637356
		0.747014	0.686393	0.57731	0	0.63281	0.222486	0.550504
		0.750858	0.619172	0.566259	0	0.661562	0.340602	0.314625
		0.594376	0.277626	0.603606	0.250512	0.689352	0.447137	0.60624
		0.635726	0.608634	0.542615	0.31908	0.680782	0	0.577041
		0.683017	0.694217	0.357979	0.267526	0.536641	0	0.610718
		0.687663	0.592693	0.616871	0	0.607155	0.611013	0.447092
		0.734345	0.345832	0.59856	0.427357	0.577971	0	0.577169
		0.624623	0.636602	0	0.41713	0.521453	0.675923	0.503646
		0.679238	0	0.590179	0	1.08583	0	0.678542
		0.672988	0.604057	0.566194	0.291024	0.656833	0	0.586173
		0.628217	0.670154	0.446737	0.316893	0.561413	0	0.624265
		0.571465	0.478591	0.476965	0.319924	0.736502	0.632475	0.425457
		0.65642	0.493475	0.584	0.433887	0.532867	0.253586	0.509104
		0.695507	0.635225	0.662614	0.375437	0.695135	0	0.604868
		0.669772	0	0.465863	0.437041	0.344524	0.604718	0.716922
		0.701216	0.422265	0.586379	0.399083	0.595142	0	0.583784
		0.689727	0.5708	0.523175	0.401277	0.668442	0.250798	0.592668
		0.743326	0.584947	0.61572	0.284248	0.581198	0.419806	0.672411
		0.592385	0.713477	0.268626	0.404941	0.602085	0.460104	0.658156
		0.685231	0.483102	0.661564	0.268462	0.563375	0	0.629597
		0.942006	0.655122	0.560649	0	0.656568	0	0.658724
		0.634269	0.468694	0.588346	0.286662	0.656649	0	0.498275
		0.679395	0.737711	0.546311	0.350734	0.722246	0	0
		0.741056	0.236839	0	0.179521	0.648019	0	0.614272
		0.792662	0.637155	0.553035	0	0.711618	0	0.53492
		0.62419	0.678557	0.515225	0.425547	0.576264	0	0.661426
		0.64232	0.220851	0.506548	0.543986	0.602728	0.143476	0.616181
		0.671786	0.737498	0.465145	0.285799	0.495394	0	0.595046
		0.562939	0.740243	0.489448	0.241755	0.577794	0	0.59699
		0.725184	0.657112	0.530189	0.135053	0.798858	0.233509	0.57541
		0.714389	0.790113	0.559763	0.324808	0.484184	0	0.482176
		0.50533	0.676019	0.28633	0.445594	0.657885	0	0.655592
		0.792405	0	0.612713	0.482854	0.609383	0	0.552952
		0.700287	0.476436	0.487485	0.17803	0.605145	0.483877	0.576877
		0.708339	0	0.650407	0.46646	0.675506	0.438553	0.487904
		0.548732	0.52204	0.255447	0.240952	0.532985	0.497986	0.651588
		0.588703	0	0.374726	0.184175	0.590805	0.26369	0.419576
		0.659653	0.51218	0.643543	0.155518	0.581349	0.205957	0.728389
		0.61329	0.744557	0.533588	0.288499	0.652305	0	0.660292
		0.589604	0.508737	0.616649	0.14682	0.404055	0	0.53802
		0.693877	0.362103	0.666584	0.365642	0.250824	0	0.541205
		0.636966	0.696132	0.547434	0.407716	0.487564	0.449282	0.632472
		0.65438	0.696224	0.547481	0.468145	0.500926	0.363735	0.700499
		0.592512	0.676112	0.5472	0.382743	0.638266	0.162062	0.425801
		0.725799	0.490605	0.561911	0.281138	0.557466	0.286968	0.593738
		0.696213	0	0.623198	0.164842	0.552572	0	0.532216
		0.704657	0.651225	0.593618	0.310586	0.699327	0.380398	0.526926
		0.605666	0.595207	0.591217	0.484517	0.371596	0	0.655639
		0.62986	0.739674	0.625895	0.622284	0.787493	0.487048	0.417426
		0.657392	0.616011	0.569073	0.380649	0.680443	0	0.543544
		0.708459	0.730073	0.625002	0.449624	0.669873	0	0.426953
		0.659771	0	0.537837	0	0.642964	0	0
		0.648126	0.173418	0.502813	0.154622	0.596658	0.681235	0.662753
		0.52251	0	0.469692	0	0.617843	0	0.166874
		0.669273	0.643754	0.505574	0.479549	0.751749	0.408974	0.486954
		0.698289	0.655862	0.447117	0.500235	0.641623	0.379082
		0.641683	0.676728	0.559699	0	0.682995	0
		0.635691	0.722598	0.636171	0.180532	0.571919	0
		0.703303	0.606565	0.559987	0.407192	0.599054	0
		0.713468	0.58911	0	0.41949	0.710774	0
		0.678447	0.62583	0.543361	0	0.441048	0
		0.656884	0.711043	0.270753	0	0.671051	0
		0.707314	0.599986	0.408042	0.376061	0.494646	0.58549
		0.663324	0.345165	0.543495	0.443489	0.671873	0.380461
		0.79991	0.529948	0.576608	0.194596	0	0
		0.67064	0.681538	0.506104	0.222669	0.510709	0.191575
		0.874514	0.772556	0.50826	0.413586	0.438615	0
		0.532058	0.169107	0.533053	0.375235	0.62137	0.224376
		0.693693	0.55012	0.592449	0.269802	0.584058	0.359259
		0.656864	0	0.575141	0.452511	0.647543	0
		0.671999	0.469722	0.615654	0.386545	0.68954	0
		0.617213	0.747929	0.555934	0.370294	0.630211	0.600481
		0.672145	0.573688	0.526322	0.268348	0.637587	0
		0.741061	0.550266	0.550561	0.234519	0.64247	0
		0.667525	0.713794	0.342854	0.503664	0.667635	0.297176
		0.641224	0.71829	0.627663	0	0.573254	0
		0.60064	0.709346	0.619298	0.241668	0.766995	0
		0.713393	0.637671	0.552654	0	0.492348	0
		0.640821	0.290025	0.484417	0	0.587752	0.360206
		0.392769	0.664937	0.287644	0.479072	0.880886	0
		0.68589	0.563409	0.690275	0.405478	0.709536	0.352299
		0.585151	0.571728	0.52558	0.244578	0.638649	0.466956
		0.639103	0	0.550975	0.306019	0.537696	0.461266
		0.611182	0.61999	0.534002	0.349434	0.165968	0
		0.715902	0	0.575873	0.353848	0.619047	0.323893
		0.582926	0.576601	0.561389	0.479914	0.769455	0.389222
		0.302935	0.696392	0.614063	0.250586	0.613374	0.611513
		0.666009	0.544163	0.631559	0	0.647378	0.295102
		0.675631	0.546603	0.568243	0.221821	0.59378	0.467136
		0.57768	0.546718	0.606419	0	0.779717	0
		0.795883	0.533871	0.538854	0.279221	0.537435	0.454055
		0.623186	0.677361	0.404024	0.433833	0.594729	0
		0.651705	0.531422	0.599715	0.362959	0.156583	0
		0.731553	0.526656	0.515457	0.301641	0.580835	0
		0.746719	0.744961	0.553394	0	0.633714	0.507302
		0.529796	0.662853	0.583598	0.248886	0.656708	0
		0.724201	0.612483	0.420871	0.241092	0.663109	0.284528
		0.622852	0.667098	0.604729	0.495708	0.608854	0
		0.610498	0.497005	0.646814	0	0.640388	0
		0.623916	0	0.664605	0	0.605539	0
		0.632624	0.653838	0.626844	0.418586	0.696242	0.164783
		0.64044	0.472553	0	0.255344	0.605421	0
		0.617074	0.332828	0.602336	0.458401	0.54373	0.182909
		0.550782	0.671584	0.52917	0.360867	0.623317	0.257621
		0.672573	0.257876	0.538017	0.606867	0.583118	0
		0.684228	0.724639	0.510589	0.336618	0.782517	0.267641
		0.639013	0.451549	0.553778	0.262239	0	0.22957
		0.663869	0.424139	0.50609	0.450567	0.464311	0
		0.67449	0	0.618732	0	0.609433	0
		0.738161	0.503065	0.57283	0.303508	0.553513	0.245556
		0.6788	0.679134	0.542084	0	0.533628	0
		0.702271	0.671974	0.558186	0.46155	0.723097	0.204176
		0.693826	0.650701	0.711022	0.48856	0.689005	0
		0.702814	0.401011	0.659273	0.352355	0.581737	0
		0.692833	0	0.619931	0	0.429892	0
		0.65361	0.522878	0.612968	0.287726	0.651422	0.408138
		0.757897	0.534458	0.568099	0.348763	0.649043	0.45395
		0.604172	0.594263	0.52663	0.313283	0.274971	0
		0.703672	0.693548	0.576834	0.396036	0.681988	0.544763
		0.678226	0.525046	0.586706	0	0.61949	0
		0.582802	0.667731	0.581952	0.11617	0.623271	0.311901
		0.642048	0.738763	0.541206	0.172781	0.485033	0.168344
		0.664867	0.575074	0.567127	0.280009	0.473632	0
		0.615751	0.630954	0.495038	0	0.553655	0
		0.766497	0.570913	0.520024	0	0.678583	0.449627
		1.21946	0.754819	0.544086	0.506952	0.518211	0
		0.674023	0.588593	0.616335	0	0.584046	0
		0	0.494336	0.583518	0	0.807535	0
		0.645241	0.624997	0.519615	0.489533	0.681554	0
		0.632726	0.403461	0.604524	0.630491	0.65704	0.472885
		0.759343	0.296054	0.619196	0.375077	0.534321	0
		0.582257	0.682032	0.623978	0	0.526507	0
		0.683093	0.16446	0.574285	0.249133	0.646575	0.408797
		0.680691	0.40782	0.509058	0.383702	0.501047	0
		0.540766	0	0.695168	0.219353	0	0.552386
		0.766054	0.648201	0.682603	0	0.590539	0
		0.516616	0.636355	0.662824	0	0.659321	0
		0.627961	0.628159	0.630824	0	0	0
		0.655461	0.575764	0.616396	0	0.565941	0
		0.588905	0.562935	0.448094	0.282287	0.616562	0.325813
		0.37566	0.677862	0.721724	0.441079	0.576574	0
		0.608329	0.59514	0.542555	0	0.658307	0
		0.672678	0.703989	0.532943	0.231175	0.423798	0
		0.417885	0.574369	0.540259	0.309278	0.746862	0.466577
		0.491245	0.639031	0.430015	0	0.594312	0
		0.711249	0.608931	0.522781	0.335963	0.213484	0
		0.59927	0.674554	0.496864	0.219224	0.543361	0
		0.698504	0.524585	0.628273	0.371763	0.64047	0
		0.64941	0.690195	0.577464	0.317841	0.712048	0
		0.497188	0.481608	0.540027	0.439133	0.622825	0
		0.675958	0.415492	0.526479	0.458185	0.615106	0
		0.69138	0.606324	0.595061	0.328142	0.681517	0
		0.690302	0.396128	0.590343	0.423782	0.52616	0.21628
		0.741799	0.570258	0.643395	0.429853	0.358168	0
		0.626058	0.625237	0.17918	0.295926	0.634237	0.484063
		0.670527	0.533459	0.555133	0.155549	0.614176	0.44764
		0.698584	0.628328	0.590436	0.341235	0.861829	0.329279
		0.601194	0.653058	0.558239	0.278144	0.612837	0.526832
		0.649462	0.501249	0.565511	0	0	0
		0.706035	0.62177	0.627135	0	0.621964	0.236525
		0.794245	0.659889	0.605397	0.2493	0.572894	0
		0.58477	0.531532	0.427764	0.099066	0.717201	0.514754
		0.678717	0.41932	0.460144	0	0.638379	0.430837
		0.66877	0.438492	0.577162	0	0.56372	0.291688
		0.655442	0.724902	0.526264	0	0.421466	0.338583
		0.898057	0.561837	0.596318	0.406481	0.770394	0.595903
		0.646658	0.487305	0.599585	0.362157	0.662239	0.336392
		0.708554	0.480646	0.600027	0.337888	0.534261	0
		0.657912	0.654733	0.359065	0.247655	0.68046	0
		0.732944	0.569329	0.550234	0.156121	0.652188	0.549652
		0.448462	0.34818	0.561402	0.239892	0.736943	0.204176
		0.660498	0.533791	0.297612	0.404178	0.508913	0
		0.674326	0.604269	0.701317	0.303169	0.698186	0.372457
		0.682242	0.566793	0.424366	0.216007	0.343339	0
		0.568924	0.668988	0.593265	0.442518	0.660726	0
		0.642042	0.614723	0.382459	0.415229	0	0
		0.58804	0.482739	0.58358	0.251818	0.494401	0
		0.693329	0.321574	0.638703	0.498887	0.553963	0
		0.640376	0.5331	0.544208	0.294614	0.691162	0
		0.561809	0.660301	0.489884	0.174738	0.503289	0.270225
		0.629806	0.663546	0.495666	0.341571	0.554775	0
		0.680347	0.619616	0.606683	0	0.652767	0
		0.671524	0.670342	0.499364	0.532522	0.446781	0
		0.67544	0.680004	0.452142	0.380045	0.619831	0
		0.711559	0.648614	0.633788	0	0.563177	0.33898
		0.605079	0.462462	0.602757	0	0.607904	0.32883
		0.694422	0.618048	0.589674	0	0.62951	0
		0.625042	0.653038	0.644473	0	0.620474	0
		0.709506	0.592144	0.575087	0.400721	0.62321	0.312878
		0.733162	0.608972	0.528341	0.429655	0.58621	0
		0.629873	0.49914	0.59297	0.308616	0.676286	0
		0.612885	0.452007	0.567788	0.337569	0	0
		0.764886	0.63627	0.567881	0	0.61944	0
		0.652401	0.421999	0.590159	0.120808	0.648264	0.379439
		0.708377	0.569589	0.561863	0.222466		0
		0.450061	0.49332	0.53201	0.357344		0.463312
		0.675409	0.61729	0.631204	0.258115		0.534715
		0.599502	0.613432	0.5617	0.310359		0
		0.779976	0.588333	0.566827	0		0
		0.586748	0.608848	0.637129	0.336768		0
		0.73492	0.623359	0.509773	0.435214		0.626971
		0.347111	0.348537	0.56547	0.259239		0.60059
		0.942425	0.524657	0.597664	0.356445		0
		0.276699	0.668107	0.488489	0.314524		0.366479
		0.660279	0.544204	0.588062	0.202061		0.411105
		0.447371	0.683057	0.596426	0		0
		0.641543	0.512929	0.582865	0.21879		0
		0.499864	0.653883	0.541124	0		0
		0.614797	0.370707	0.539323	0.324347		0.37086
		0.664114	0.326095	0.502387	0.375726		0.323537
		0.645046	0.514204	0.766941	0.353705		0.302352
		0.48895	0.679181	0.600316	0.164864		0
		0.56705	0.715131	0.589734	0		0
		0.577306	0.660595	0.641236	0.359161		0
		0.403339	0.876809	0.611675	0.438926		0
		0.677352	0.672943	0.544896	0.382631		0.316924
		0.265071	0	0.581022	0.403969		0
		0.737686	0.549016	0.674853	0		0.451765
		0.696313	0.731641	0.686353	0.403469		0.420552
		0.533413	0.530143	0.559248	0.46805		0.372709
		0.635496	0	0.47801	0.413407		0
		0.634208	0.400758	0.598606	0.470666		0
		0.813523	0.419863	0.547284	0.389867		0
		0.782862	0.672818	0	0		0
		0.69759	0.270954	0.557491	0.214284		0
		0.699007	0	0.662441	0		0
		0.648891	0	0.429516	0.415661		0
		0.646687	0.360978	0.611368	0.182643		0
		0.717002	0	0.576995	0.411774		0.129424
		0.634373	0.671057	0.567318	0.305935		0
		0.6754	0.549061	0.412603	0		0.693191
		0.675881	0.619092	0.540538	0.373249		0.600882
		0.661158	0.630104	0.585897	0.439085		0
		0.721714	0.531169	0.590974	0.473738		0.192157
		0.706773	0.653489	0.558652	0		0
		0.980668	0.763513	0.57016	0.417124		0
		0.667062	0.681649	0.605578	0.413869		0.423528
		0.427103	0.405169	0.510025	0.335156		0.282948
		0.623221	0.604175	0.502402	0.469528		0
		0.653922	0.513034	0.696079	0.339952		0
		0.723843	0.689221	0.439022	0.308841		0.489267
		0.567325	0.378538	0.396691	0		0
		0.584273	0.625258	0.43701	0.409823		0.24705
		0.67206	0.609472	0.471378	0.377577		0
		0.717806	0.481726	0.253882	0		0
		0.780899	0.60915	0.591243	0.317372		0
		0.675641	0.630532	0.586876	0.263224		0.533642
		0.699567	0.50804	0.520727	0		0.541297
		0.666326	0.675297	0.661041	0.365424		0.377892
		0.731445	0.966738	0.57242	0.199194		0
		0.675649	0.613952	0.585086	0.38309
		0.619074	0.556157	0.601542	0.361895
		0.686898	0.653151	0.578972	0.547155
		0.539104	0	0.564956	0
		0.630438	0.623678	0.443286	0.267607
		0.690546	0.591086	0.574254	0.356043
		0.564711	0.613011	0.581779	0
		0.673097	0.649654	0.606341	0.214906
		0.575358	0.739474	0.600521	0.158424
		0.626343	0	0.598126	0
		0.760539	0.653759	0.554182	0
		0.814241	0.309447	0.532648	0.483566
		0.66064	0.344345	0.50652	0
		0.762687	0.61607	0.556929	0.493694
		0.666079	0.691278	0.519641	0.546537
		0.703302	0.489626	0.43561	0.390629
		0.529568	0.625414	0.630827	0.399552
		0.486544	0.241529	0.564501	0
		0.662051	0.442752	0.564126	0.26077
		0.576337	0.615099	0.64551	0.144505
		0.72799	0.531635	0.517903	0.359017
		0.713849	0	0.564486	0.446791
		0.656013	0.626014	0.590999	0.202407
		0.686315	0	0.631781	0
		0.461035	0.686529	0.571347	0.382258
		0.755224	0.741246	0.535955	0
		0.669815	0.673224	0.559784	0
		0.703775	0.362239	0.500448	0.322045
		0.407922	0	0.673966	0.380858
		0.615081	0.562985	0.536557	0
		0.841806	0.374978	0.547265	0
		0.619945	0.438859	0.502141	0.285573
		0.699839	0.542611	0.604745	0
		0.699865	0.518747	0.469022	0.318622
		0.59992	0.594782	0.504888	0.308258
		0.1942	0.597289	0.613951	0.362486
		0.668386	0	0.651801	0.500417
		0.538472	0.631211	0.608039	0.208567
		0.745712		0.574148	0
		0.704318		0.510032	0.36083
		0.693028		0.59799	0
		0.607597		0.528523	0.392461
		0.661666		0.518392	0.369419
		0.622448		0.53837	0
		0.602243		0.650568	0
		0.622035		0.534893	0.407776
		0.638703		0.685836	0.307294
		0.606671		0.535269	0.669825
		0.767888		0.582569	0.514515
		0.697328		0.645831	0.177195
		0.806205		0	0
		0.748709		0.347867	0
		0.627361		0.537366	0.511798
		0.608224		0.59007	0.543097
		0.666732		0.606682	0
		0.670278		0.617625	0.299634
		0.621189		0.560197	0
		0.703392		0.577615	0.181708
		0.764022		0.612411	0.294601
		0.758378		0.57389	0.312404
		0.632283		0.574822	0
		0.660161		0.614691	0.469788
		0.661674		0.597941	0.470483
		0.689803		0.5149	0.357752
		0.461676		0.497989	0.418653
		0.547476		0.623641	0.219985
		0.698293		0.568751	0.405018
		0.608456		0.456393	0
		0.707758		0.504372	0.304193
		0.636831		0.66275	0.450213
		0.724244		0.479469	0.338622
		0.693951		0.609415	0.249746
		0.445862		0.53359	0.266049
		0.704331		0.513166	0
		0.476598		0.596184	0.189165
		0.621912		0.568625	0.334764
		0.531833		0.682368	0.20514
		0.61093		0.557206	0
		0.726572		0.55854	0
		0.759397		0.492445	0.327069
		0.547342		0.606237	0.44038
		0.704087		0.489908	0.520105
		0.517119		0.694415	0.410138
		0.487954		0.588201	0.386298
		0.677113		0.62503	0
		0.647149		0.571098	0.473974
		0.660221		0.513341	0.40117
		0.658087		0.562864	0
		0.658571		0.539031	0.269848
		0.755824		0.550647	0.296713
		0.626445		0.612659	0.45405
		0.645788		0.379078	0.243203
		0.641617		0.575168	0.294292
		0.661009		0	0
		0.525412		0	0.531891
		0.666411		0.518005	0.27886
		0.68449		0.616889	0
		0.635436		0.527655	0
		0.691371		0.572105	0.277483
		0.292898		0.605687	0
		0.604194		0.565321	0.317619
		0.467519		0.488711	0
		0.657014		0.421426	0.299391
		0.594335		0.610769	0
		0.700116		0.591805	0.299938
		0.724045		0.53823	0.423914
		0.678218		0.664545	0.395644
		1.23199		0.461718	0.210855
		0.604048		0.490639	0.479341
		0.584564		0.580246	0
		0.591815		0.591454	0.369008
		0.666208		0.509465	0.191126
		0.618908		0.577963	0.362251
		0.630468		0.324153	0
		0.303566		0.610034	0.29837
		0.767411		0.437503	0.225295
		0.682931		0.617162	0.37289
		0.672422		0.558189	0
		0.68064		0.599875	0.149192
		0.616378		0.482418	0.192542
		0.629902		0.634379	0.304105
		0.730291		0.599341	0.264569
		0.676814		0.549691	0
		0.623644		0.560021	0
		0.544635		0.474785	0
		0.712704		0.563879	0.430742
		0.675288		0.601646	0.34423
		0.620914		0.462437	0.400602
		0.660506		0.667072	0.450323
		0.638993		0.527933	0.359128
		0.61166		0.501349	0
		0.641799		0.590118	0.483976
		0.703211		0.61068	0
		0.686546		0.487327	0.140687
		0.698492		0.656178	0.176893
		0.678498		0.578169	0.365224
		0.670014		0.625516	0.472094
		0.651391		0.256633	0.364083
		0.65577		0.664576	0.276858
		0.743075		0.650584	0.393376
		0.70653		0.567456	0.419015
		0.665031		0.51169	0.288479
		0.676816		0.390986	0.341153
		0.67083		0.565219	0.332625
		0.621259		0.551499	0.313822
		0.762549		0.553638	0
		0.575825		0.603437	0.330669
		0.66826		0.648306	0
		0.791528		0.600144	0.478318
		0.70247		0.601566	0.631036
		0.713446		0.550058	0.201104
		0.694911		0.586854	0.312975
		0.627974		0.593335	0
		0.668124		0.555932	0
		0.71935		0.596986	0.333566
		0.627848		0.541452	0
		0.638418		0.462824	0.519527
		0.679111		0.466406	0
		0.676555		0.586608	0.439949
		0.202053		0.62453	0.29067
		0.624577		0	0.37573
		0.736274		0.410877	0
		0.610937		0.511884	0.215473
		0.605342		0.549487	0
		0.829917		0.570047	0.565077
		0.685978		0.591182	0.311407
		0.643134		0.656852	0.271148
		0.758879		0.560343	0.176754
		0.720405		0.543756	0.22691
		0.650244		0.672698	0.178458
		0.624583		0.675824	0.250868
		0.555643		0.600631	0.367348
		0.672387		0.662705	0.336941
		0.686451		0.586316	0.417335
		0.711468		0.542812	0
		0.659519		0.613476	0.212864
		0.738439		0.540789	0.286766
		0.730504		0.544035	0.2521
		0.739069		0.61314	0.358876
		0.718944		0.61248	0.379657
		0.909367		0.636753	0.208466
		0.707042		0.553592	0.47475
		0.535145		0.516928	0.15647
		0.724368		0.66557	0.381226
		0.707737		0.571691	0
		0.651388		0.554177	0
		0.93764		0.591958	0.344876
		0.720944		0.55143	0
		0.819623		0.543842	0.218158
		0.560105		0.601493	0.285345
		0.61445		0.360955	0.382874
		0.68228		0.610971	0.196928
		0.776833		0.62563	0.258172
		0.574862		0.348866	0
		0.664753		0.574966	0.339046
		0.65355		0.650774	0.264668
		0.683466		0.579682	0.119075
		0.635453		0.510062	0.299587
		0.658945		0.655306	0.300905
		0.630983		0.671595	0
		0.637252		0.427236	0.295014
		0.668917		0.591377	0.465792
		0.629905		0.538685	0.342828
		0.651724		0.56075	0
		0.634362		0.502046	0.238372
		0.616726		0.561498	0.356679
		0.637172		0.58763	0.349197
		0.584477		0.607754	0.220195
		0.440711		0.419352	0.356427
		0.684966		0.504602	0
		0.637648		0.578007	0.50609
		0.669022		0.612076	0.311202
		0.757283		0.617982	0.109448
		0.624572		0.548689	0.437263
		0.69663		0.578372	0.19957
		0.672088		0.547978	0.390521
		0.616575		0.5961	0.306284
		0.669745		0.531965	0
		0.712774		0.570461	0
		0.901044		0.593814	0
		0.682961		0.627096	0.417641
		0.699793		0.556511	0.433458
		0.617254		0.619488	0
		0.684596		0.578138	0.284439
		0.705863		0	0.416271
		0.667985		0.678317	0
		0.661978		0.597837	0
		0.589457		0.617442	0.375625
		0.715695		0.427177	0.176319
		0.58751		0.614724	0
		0.606631		0.531125	0
		0.594808		0.617121	0.322688
		0.666034		0	0.303791
		0.724612		0.532255	0.467351
		0.726015		0.637607	0.408899
		0.649302		0.531592	0.372717
		0.536516		0.472735	0
		0.695078		0.662353	0.316799
		0.693783		0.531422	0.448411
		0.633073		0.575311	0.475407
		0.647203		0.53968	0.410303
		0.760147		0.568296	0
		0.616518		0.639388	0.142723
		0.655818		0.534877	0.191424
		0.557472		0.585574	0.308122
		0.683823		0.535788	0.413327
		0.606129		0.581034	0.422106
		0.664441		0.57236	0
		0.528388		0.651852	0
		0.62003		0.607218	0.335146
		0.592606		0.596026	0
		0.68524		0.558664	0.272504
		0.688561		0.552578	0
		0.678808		0.539913	0
		0.682519		0.608512	0.274883
		0.662777		0.542739	0.225629
		0.677586		0.673088	0
		0.768396		0.594003	0.366846
		0.578272		0.52234	0.192961
		0.64371		0.553905	0.385574
		0.600661		0.646674	0.432441
		0.675693		0.583026	0.40265
		0.612886		0.577398	0.450674
		0.709308		0.257116	0.409535
		0.749208		0.530746	0.415301
		0.72305		0.563754	0.312939
		0.531899		0.529796	0.486108
		0.758634		0.506682	0.365912
		0.575924		0.488917	0.329964
		0.679561		0.590582	0.407631
		0.770151		0.539445	0
		0.725431		0.633113	0
		0.644581		0.487647	0
		0.606796		0.533245	0
		0.594772		0.392587	0.330505
		0.651864		0.550747	0.18597
		0.627663		0.526142	0.268995
		0.662709		0.611128	0.227603
		0.723085		0.579272	0.339807
		0.659076		0.483766	0
		0.62695		0.614003	0
		0.70204		0.499301	0.524574
		0.454064		0.455667	0
		0.863045		0.559929	0
		0.572646		0.56078	0
		0.681873		0.578776	0.407269
		0.645604		0.612246	0
		0.637818		0.477446	0
		0.613634		0.489116	0
		0.686064		0.529215	0.099909
		0.597928		0.566904	0.481273
		0.661149		0.531626	0.202434
		0.696847		0.489882	0.345748
		0.580836		0.513203	0.112914
		0.713923		0.584813	0
		0.660822		0.552173	0.056001
		0.636384		0.495628	0.454421
		0.479997		0.59008	0
		0.663979		0.508692	0
		0.672325		0.566399	0.412211
		0.60352		0.539901	0.35582
		0.590751			0
		0.613083			0.496108
		0.666086			0.458412
		0.652009			0.31509
		0.725942			0
		0.670509			0.284244
		0.634948			0
		0.634173			0
		0.69808			0.487847
		0.676086			0.417806
		0.648981			0
		0.64063			0.395906
		0.662536			0.115873
		0.675127			0
		0.748125			0.466413
		0.750084			0.234779
		0.5689			0.244493
		0.651855			0
		0.676937			0
		0.640549			0.376555
		0.717144			0.374126
		0.58654			0
		0			0.305401
		0.735421			0
		0.646791			0.452919
		0.820451			0
		0.661298			0
		0.732097			0.232677
		0.607009			0.282708
		0.691785			0.431277
		0.680188			0
		0.696982			0.258461
		0.763221			0
		0.797556			0
		0.84891			0.265067
		0.622497			0.569608
		0.730443			0.483428
		0.704643			0.268957
		0.644614			0
		0.572052			0
		0.62368			0
		0.679698			0.445239
		0.544258			0.197444
		0.686233			0.293374
		0.532428			0.441773
		0.818142			0.277612
		0.788636			0.178731
		0.74267			0.273039
		0.681589			0.40378
		0.664587			0.280645
		0.708887			0
		0.678815			0
		0.635477			0.23044
		0.652321			0.373384
		0.606771			0.2328
		0.662712			0.352899
		0.573419			0.440946
		0.694948			0.37988
		0.49762			0
		0.671787			0.552598
					0
					0.518909
					0.321346
					0.122521
					0
					0
					0
					0
					0.444729
					0
					0.343912
					0.433179
					0
					0.349119
					0
					0.367595
					0.386763
					0

## Sheet: Figure 5H
None	PFKFB3i	AMPKi
0.794475	0.642998	0.828728
0.816867	0.693549	0.688538
0	0.66545	0.836025
0.80112	0.757519	0.749601
0.680011	0.739364	0.758137
0.770386	0.720211	0.789026
0.815138	0.782044	0.744525
0.714731	0.817389	0.725105
0.778051	0.772746	0.690776
0.257231	0.513857	0.358135
0.725955	0.815811	0.738147
0.780595	0.77853	0.68475
0.720937	0.481006	0.816171
0.778679	0.458204	0.494118
0.748475	0.442806	0.768773
0.638126	0.648065	0.735342
0.743015	0.699238	0.739869
0.667526	0.811242	0.743342
0	0.733143	0.676093
0.743416	0.739311	0.833301
0.798678	0.795219	0.802595
0.820567	0.75842	0.836321
0.774768	0.734444	0.80738
0.825152	0.656971	0.785651
0.722	0.683636	0.764361
0.855315	0.724571	0.726731
0.770189	0	0.641235
0.742914	0.718626	0.785013
0.783329	0.593594	0
0.749482	0.656784	0.791986
0.611119	0.72752	0.590613
0.805551	0.717294	0.774799
0.719879	0.503061	0.786809
0.753175	0.752663	0.798034
0.8099	0.705843	0
0.761984	0.704123	0.733871
0.781097	0.778197	0.670517
0.737	0.77297	0.699182
0.727743	0.633823	0.804019
0.754993	0.8075	0.778652
0.711912	0.686349	0.722624
0.783202	0.774762	0.734203
0.509257	0.650343	0.759764
0.780199	0.714174	0
0.681978	0.817844	0.76169
0.655726	0.754556	0.839704
0.693152	0.494736	0.217755
0.684234	0.762368	0.754781
0.807002	0.695984	0.777157
0.30366	0.673613	0.757208
0.733235	0.781237	0.682971
0.740823	0.835214	0
0.765861	0.271642	0.837018
0.769401	0.708893	0.738801
0.818259	0.752277	0.685673
0.747054	0.773203	0.820113
0.228358	0.63863	0.75111
0.74295	0.752692	0.558808
0	0.336973	0.584872
0	0.716224	0.765844
0.826528	0.684388	0.711833
0.851213	0.770912	0.753405
0	0.740348	0.700981
0.736978	0.822419	0.747961
0.756941	0.775124	0.734145
0.703057	0.733105	0.733505
0.710311	0.208457	0.64846
0.649517	0.809393	0.723279
0.802523	0.709541	0.737663
0.586485	0.738722	0.760289
0.723186	0.631134	0.764185
0.740134	0.74425	0.845801
0.592228	0.667768	0.784353
0	0	1.42148
0.710458	0.744621	0.802775
0.745302	0.772508	0.217425
0.727779	0.691845	0.740585
0.825601	0.709541	0
0.524459	0.772629	0.794218
0.809136	0.132445	0.713638
0.850216	0.677708	0.723923
0.404134	0.450019	0.766267
0.781324	0.779339	0.689009
0.806059	0.773289	0.758648
0.766678	0.344199	0.64133
0.802995	0.71713	0.752832
0.733627	0.743854	0.636233
0.760423	0.829818	0.765809
0.7884	0.604971	0.718044
0.697879	0.756809	0.778525
0.699262	0.79629	0.662715
0.790077	0.766429	0.717202
0.750857	0.687595	0.833457
0.802844	0.833339	0.772952
0.736769	0.754513	0.800197
	0.739666	0.799965
	0.330838	0.750641
	0.681584	0.668646
	0.723975	0.745891
	0.174204	0.675462
	0.770368	0.749228
	0.723764	0.789105
	0.828604	0.679325
	0.703961	0.781393
	0.717125	0.792282
	0.46775	0.691853
		0.724366
		0.71563
		0
		0.802777
		0.702228
		0.744873
		0.164398
		0.75074
		0.795488
		0.700234
		0.709394
		0.74909
		0.347071
		0.766731
		0.734259
		0.744893
		0.79485
		0.762102
		0.738545
		0.783657
		0.805047
		0.69668
		0.729242
		0.768313
		0.790485
		0.789877
		0.777029
		0.771769
		0.260767
		0.758572
		0.235548
		0.777665
		0.752549
		0.796791
		0.973494
		0.739425
		0.702833
		0.715779
		0.736963
		0
		0.789356
		0.757549
		0.747567
		0.725727
		0.820834
		0.717167
		0.698321
		0.710379
		0.796221
		0.750926
		0
		0.719314
		0.780723
		0.793124
		0.730322
		0.719534
		0.766016
		0.214848
		0.769543
		0.710832
		0.649263
		0.683918
		1.27155
		0.830986
		0.714815
		0.506231
		0.678478
		0.765211
		0.774973
		0.797459
		0.927833
		0.687395
		0.777331
		0.77479
		0.294254
		0.738562
		0.720398
		0.71992
		0.827584
		0.69764
		0.835783
		0.773784
		0.522103
		0.803068
		0.741662
		0.159474
		0.869834
		0.736693
		0.759795
		0.602619
		0.838626
		0.799727
		0.73255
		0.742665
		0.681243
		0.295307
		0.838427
		0.71699
		0.811136
		0.710843
		0.702081
		0.801137
		0.773321
		0.824654
		0.715727
		0.780287
		0.718457
		0.715925
		0.791884
		0.842993
		0.840676
		0.789513
		0.169492
		0.758028
		0.73514
		0
		0.781037
		0.595897
		0.514609
		0
		0.713345
		0.716776
		0.635487
		0.790229
		0.700027
		0.704312
		0.757374
		0.741864
		0.745551
		0.745265
		0.682389
		0.708244
		0.766914
		0.736804
		0.751264
		0.729001
		0.751283
		0.709224
		0.776822
		0.507113
		0.744672
		0
		0.847884
		0.327674
		0.788684
		0.75048
		0.785636
		0.777031
		0.156271
		0.327186
		0.841518
		0.681018
		0.706744
		0.734391
		0.816242
		0.698013
		0.747981
		0.885808
		0.750117
		0.797596
		0.751517
		0.808072
		0.809995
		0
		0.681031
		0.749927
		0.723809
		0.752587
		0.760797
		0.752255
		0.744743
		0.822138
		0.768721
		0.824004
		0.639586
		0.76101
		0.790091
		0.80247
		0.73514
		0.734198
		0.811589
		0.683389
		0.703038
		0.791079
		0
		0.745709
		0.724226
		0.751889
		0.886743
		0.733328
		0.709789
		0.705552
		0.636874
		0.814308
		0.730475
		0.585475
		0.879305
		0.778504
		0.698861
		0.742626
		0.691586
		0.822703
		0.747507
		0.765454
		0.70277
		0.80925
		0.428558
		0.794926
		0.689285
		0.733965
		0.835403
		0.889485
		0.519983
		0.672279
		0.824164
		0.724076
		0.794855
		0.766194
		0.800383
		0
		0.773735
		0.35006
		0.852931
		0.787949
		0.763047
		0.774111
		0.707933
		0.821004
		0.840083
		0.686991
		0.780783
		0.305383
		0.698759
		0.758829
		0.819623
		0.752485
		0.816569
		0.665709
		0.795374
		0.798677
		0.683932
		0.738641
		0.82743
		0.778754
		0.808096
		0.809283
		0.788715
		0.786401
		0.781793
		0.781614
		0.690546
		0
		0.706467
		0.830215
		0.767509
		0.732385
		0.696516
		0.798018
		0.730508
		0.768232
		0.753332
		0.80424
		0.799332
		0.778332
		0.711979
		0.810131
		0.767996
		0.72981
		0.078249
		0.805702
		0.769863
		0.758954
		0.663534
		0.739361
		0.745494
		0.793975
		0.756926
		0.722207
		0.754531
		0.755366
		0.816866
		0.74608
		0.837803
		0.768587
		0.787868
		0.718532
		0.714444
		0.901842
		0.796057
		0.756486
		0.796553
		0.771724
		0.774493
		0.319739
		0.702536
		0.821954
		0.780842
		0.79903
		0.518934
		0.748948
		0.839637
		0.731229
		0.680763
		0.753061
		0.839017
		0.765027

## Sheet: Figure 5I
None	PFKFB3i	AMPKi
0.690331	0.202947	0.493026
0.698304	0	0.432689
0.581192	0.274586	0.620405
0.725498	0.462723	0.569044
0.858225	0.372388	0.583218
0.774339	0	0.606663
0.568009	0	0.368808
0.756137	0	0.382975
0.622136	0	0.417793
0.900208	0	0.285718
0.798825	0	0.420978
0.476642	0	0.406279
0.46238	0.469402	0.559301
0.654484	0.374347	0.407717
0.712769	0.31671	0.491124
0.795148	0.227279	0.401684
0.862176	0	0.325751
0.723153	0.498795	0.364505
0.872419	0.468457	0.475232
0.852204	0.373434	0.310962
0.804163	0.334834	0.413493
0	0	0.431089
0.838528	0.461262	0.385576
0.564472	0.265772	0.496165
0.650167	0.441573	0.354359
0.689866	0.331901	0.460551
0.717089	0	0.343538
0.77921	0.439155	0.467007
0.538084	0.397677	0.517405
0.628171	0	0.501578
0.797704	0.181277	0.522242
0.774074	0	0.447474
0.776105	0.261315	0.359222
0.68687	0	0.456048
0.68942	0.372472	0.419557
0.758308	0.332632	0.343773
0.778823	0.25119	0.344606
0.982727	0	0.382788
0.733872	0	0.546223
0.21949	0.52583	0.611193
0.78059	0.190933	0.404907
0.79056	0.436152	0.346682
0.822654	0.220061	0.284929
0.784924	0.3695	0.356418
0.744436	0	0.159209
0.815907	0.513406	0.377442
0.752263	0	0.50686
0.678333	0	0.498549
0.882136	0.119636	0.480941
0.834354	0	0.449162
0.577252	0.501073	0.226926
0.818183	0.238652	0.408535
0.67317	0.231122	0.401568
0.707165	0	0.224541
0.60788	0.149628	0.353873
0.828049	0	0.341833
0.765857	0.397575	0.513243
0.721315	0.374282	0.270811
0.646839	0	0.17697
0.808425	0.338297	0.612416
0.768425	0.348916	0.547031
0.824692	0.308333	0.42838
0.774201	0.534623	0.415391
0.811039	0	0.453988
0.799502	0	0
0.782093	0	0.458046
0.813859	0	0.372269
0.735985	0.103861	0.407735
0.817985	0.358619	0.493181
0.803034	0.644775	0.457791
0.805084	0.219489	0
0.797626	0.383406	0.471831
0.803445	0.233905	0.507303
0.663684	0.359622	0.354702
0.454436	0.351302	0.267567
0.798291	0.265622	0.483942
0.782138	0.351466	0.380175
0.672779	0.157943	0.524627
0.627266	0.31317	0.239593
0.823429	0.285557	0.411697
0.756342	0.30664	0.43098
0.838091	0	0.361633
0.786725	0.289989	0.385234
0.72286	0.076818	0.46478
0.668682	0.315184	0.578044
0.613593	0	0.391476
0.64506	0	0.414116
0.869152	0.510491	0.381351
0.687158	0	0
0.705876	0	0.202213
0.709033		0.248114
0		0.285889
0.710132		0.331302
0.668372		0.430104
0.620968		0.389375
0.325241		0.507815
0.806244		0.441317
0.653337		0.449644
0.586128		0.471303
0.797767		0.471315
0.712911		0.338035
0.781674		0.468714
0.403436		0.444441
0.702695		0.484215
0.780528		0.334078
0.687636		0.405247
0.700518		0.372626
0.745452		0.549123
0.554517		0.36958
0.701532		0.336117
0.736599		0.522928
0.82346		0.320347
0.570082		0.359152
0.717776		0.401096
0.70968		0.255721
0.797199		0.362125
0.80839		0.40974
0.506207		0.560433
0.757755		0
0.632038		0.112406
0.730478		0.472077
0.668958		0.407253
0.862855		0.451903
0.674283		0.560597
0.570596		0
0.73648		0.37149
0.578738		0.552063
0.777536		0.503663
0.795676		0.516476
0.663216		0.46981
0.730225		0.367335
0.364559		0.359301
0.807403		0.476909
0.630332		0
0.457753		0.586649
0.830762		0.126401
0.71032		0.224577
0.77336		0.543182
0.757647		0.032503
0.796987		0.434259
0.781425		0
0.801728		0.296801
0.769956		0.385485
0.780399		0.45014
0.67446		0.228494
0.680258		0.48892
0.729957		0.471701
0.725893		0.628998
0.75243		0.507664
0.86884		0.48114
0.663161		0.321716
0.732215		0.388489
0.701034		0.49805
0.810634		0.565682
0.902979		0.253148
0.829038		0.378581
		0.458864
		0.317628
		0.321125
		0.304874
		0.620281
		0.426839
		0.265732
		0
		0.319953
		0.510389
		0.413258
		0.513644
		0.27762
		0.302627
		0.446318
		0.487727
		0.456046
		0.425623
		0.469157
		0.595323
		0.33545
		0.460189
		0.383312
		0.429133
		0.476442
		0.295764
		0.477962
		0.337411
		0.236579
		0.469955
		0.434148
		0.451001
		0.469856
		0.433525
		0.509815
		0.475531
		0.43058
		0.356431
		0.325247
		0.401404
		0.488586
		0.401892
		0.403807
		0.42901
		0
		0.423851
		0.569196
		0.435036
		0.38112
		0.357777
		0.404537
		0.438071
		0.451525
		0.533338
		0.409911
		0.369961
		0.310346
		0.361516
		0.351899
		0.432878
		0.564755
		0.436401
		0.333492
		0.322513
		0.426887
		0.450482
		0.409634
		0.392663
		0.37632
		0.468428
		0.416697
		0.570011
		0.384901
		0.480907
		0.447975
		0.469554
		0.217035
		0.405028
		0.294169
		0.276363
		0.378098
		0.388274
		0.239793
		0.397973
		0.534167
		0.349757
		0.374578
		0.466057
		0.322022
		0.266448
		0.487145
		0.408936
		0.57835
		0.356273
		0.570687
		0.505939
		0.418384
		0.273353
		0.447488
		0.308537
		0.475486
		0.489374
		0.36252
		0.359985
		0.353864
		0.59854
		0.410716
		0
		0.469633
		0
		0.268507
		0.477007
		0.312673
		0.30908
		0.355034
		0.420808
		0.32025
		0.501847
		0.431941
		0.294003
		0.438358
		0.445724
		0.275678
		0.467741
		0.459859
		0.491378
		0.409441
		0.213909
		0.361527
		0.460096
		0.339899
		0.472029
		0.431633
		0.378381
		0.481459
		0.410692
		0.40737
		0.521276
		0.20677
		0.197355
		0.566358
		0.405761
		0.514014
		0.392444
		0.404649
		0.413885
		0
		0.49878
		0.387326
		0
		0.438369
		0.367062
		0.727328
		0.515432
		0.469709
		0.34417
		0.409568
		0.448603
		0.197223
		0.345061
		0.50266
		0.475878
		0.544063
		0.433043
		0.185659
		0.639079
		0.352542
		0.403251
		0.392841
		0.331605
		0.295316
		0.389133
		0.553311
		0.369268
		0.43045
		0.528558
		0.35843
		0.409458
		0.345083
		0.480318
		0.350668
		0.473647
		0.595334
		0.47076
		0.41088
		0.352098
		0.361392
		0.428726
		0.504632
		0.387663
		0.490504
		0.469073
		0.398698
		0.133721
		0.431904
		0.419144
		0.498331
		0.409616
		0.609142
		0.358201
		0.35524
		0.409298
		0.418425
		0.424464
		0.499068
		0.467501
		0.356651
		0.290802
		0.434948
		0.475923
		0.445124
		0.437334
		0.432224
		0.458431
		0.429527
		0.244178
		0.222868
		0.501704
		0.21583
		0.544255
		0.370296
		0.361723
		0.488194
		0.447257
		0.380273
		0.408567
		0.430826
		0.442441
		0.337436
		0.301057
		0.311598
		0.266106
		0.292358
		0.498791
		0.504517
		0.550324
		0.359402
		0.304248
		0
		0.587578
		0.47049
		0.354454
		0.420171
		0.463615
		0.192359
		0.401699
		0.511633
		0.408579
		0.418324
		0.50492
		0.548549
		0.548331
		0
		0.364716
		0.334877
		0.472739
		0.504897
		0.508164
		0.2459
		0.446363
		0.401195
		0.41977
		0.49169
		0.408522
		0.44443
		0.305727
		0.436378
		0.435807
		0.454174
		0.356953
		0.52959
		0.528824
		0.571156
		0.474014
		0.44801
		0.400011
		0.429352
		0.458973
		0.347999
		0.383794
		0.392753
		0.527987
		0.414287
		0.383808
		0.288791
		0.411037
		0.358542
		0.414216
		0
		0.316087
		0.395711
		0.215109
		0.393676
		0.178395
		0.438793
		0.142023
		0.33233
		0.397692
		0.402968
		0.319616
		0.632584
		0.436048
		0.375308
		0.401661
		0.46126
		0.3763
		0.390119
		0.304153
		0.398304
		0.410039
		0.447117
		0.361619
		0.465325
		0.510114
		0.525395
		0.478369
		0.442689

## Sheet: Figure 5K
	Pfkfb3_OE				Mock
G0	0.52356	0.369458	3.37051	5.63611	18.0678	24.7934	25.7471	16.5414
G1	29.6684	26.4778	24.7333	24.0879	30.8657	26.4463	23.4483	28.3208
S/G2/M	69.808	73.1527	71.8962	70.276	51.0665	48.7603	50.8046	55.1378

## Sheet: Figure 5L
Ctl	Ctl (2-DG)	Pfkfb3OE	Pfkfb3OE (2-DG)
0.617517	0.533894	0.555794	0.195994
0.535103	0.397205	0.644386	0.367212
0.576347	0.749628	0.597494	0.349883
0.648508	0.384687	0.537817	0.30984
0.622922	0.646072	0.563706	0.648116
0.530159	0.647639	0.45977	0.655234
0.48227	0.651535	0.528465	0.492926
0.560916	0.44665	0.601058	0.374411
0.566458	0.437328	0.485782	0.430662
0.543984	0.632398	0.550547	0.416418
0.572509	0.679686	0.708733	0.274262
0.59413	0.489239	0.626277	0.404204
0.641936	0.535176	0.643786	0.522693
0.589033	0.660109	0.569024	0.45805
0.530696	0.537379	0.492402	0.488584
0.63761	0.63154	0.716435	0.523049
0.299027	0.557798	0.454342	0.391825
0.603607	0.605146	0.575425	0.35288
0.533057	0.289151	0.451429	0.609538
0.597965	0.507705	0.491633	0.297842
0.658195	0.538089	0.646761	0.447502
0.514392	0.41817	0.578172	0.230145
0.515244	0.375777	0.542717	0.393796
0.59401	0.510771	0.69548	0.389733
0.585439	0.402124	0.587965	0.307914
0.600398	0.443307	0.586006	0.260245
0.650105	0.532881	0.620727	0.577305
0.585282	0.579954	0.55258	0.337241
0.59217	0.497372	0.545642	0.469453
0.581783	0.674566	0.550035	0.340865
0.462128	0.648729	0.558188	0
0.609026	0.358541	0.582986	0.583324
0.528145	0.672239	0.621228	0.433733
0.575685	0.370748	0.617487	0.424408
0.589718	0.617649	0.617127	0.321955
0.533928	0.471525	0.514902	0.430253
0.651349	0.710548	0.542686	0
0.64886	0.511611	0.615623	0
0.517803	0.590905	0.705975	0.411178
0.445056	0.637792	0.539629	0.41134
0.635447	0.500397	0.559225	0.406944
0.613912	0.597414	0.581231	0.598763
0.606762	0.563978	0.478085	0.663347
0.618202	0.386734	0.579898	0.916749
0.642339	0.608563	0.638982	0.31246
0.565131	0.427138	0.401079	0.50734
0.607436	0.623635	0.682888	0.675232
0.522361	0.475307	0.528269	0.367041
0.545803	0.510081	0.569824	0.39532
0.493819	0	0.562709	0.142638
0.674884	0.602787	0.532808	0.559187
0.532786	0.431439	0.598036	0.450191
0.623633	0.423066	0.538139	0.308737
0.518974	0.511019	0.544838	0.483072
0.566729	0.555747	0.618411	0.184833
0.708819	0.563106	0.568116	0.544637
0.611699	0.445607	0.568487	0.54432
0.604112	0.632398	0.544508	0.572252
0.481004	0.552853	0.659893	0.541478
0.527838	0.363568	0.622885	0.580223
0.712012	0.696523	0.521097	0.243422
0.537401	0.571476	0.744884	0.683515
0.715141	0.28214	0.673799	0.378924
0.530322	0.408049	0.586123	0.398685
0.585199	0.456972	0.542497	0.194889
0.542182	0.538465	0.517591	0.265908
0.588124	0.636855	0.607377	0.238471
0.556391	0.642932	0.480465	0.544627
0.505019	0.462666	0.546804	0.550712
0.616242	0.529285	0.542724	0
0.77575	0.657117	0.564555	0.409092
0.617723	0.78346	0.68009	0.270803
0.650226	0.592725	0.580491	0.434802
0.636472	0.703841	0.450032	0.190771
0.579673	0.627509	0.677307	0.353082
0.570519	0.611606	0.437085	0.571993
0.534089	0.583709	0.582983	0.409628
0.653153	0.650782	0.61073	0.39761
0.546264	0.483789	0.479649	0.583648
0.576297	0.356187	0.593484	0
0.507626	0.61561	0.597387	0.293262
0.502391	0.439667	0.598399	0.376755
0.603144	0.561609	0.598257	0.242617
0.609803	0.53414	0.507574	0.656804
0.479902	0.578127	0.561648	0.37486
0.506992	0.707879	0.519841	0.365053
0.567445	0.415976	0.629437	0.319806
0.58125	0.65519	0.581178	0.459924
0.662009	0.473148	0.620737	0.37551
0.593896	0.441207	0.544816	0.402508
0.623267	0.579719	0.492649	0.589435
0.588868	0.42898	0.677215	0.628279
0.599119	0.610143	0.483142	0.303989
0.650515	0.674437	0.462567	0.516765
0.579696	0.571661	0.638858	0.400544
0.713391	0.651447	0.605602	0.40775
0.560822	0.484644	0.564909	0.532977
0.59243	0.601231	0.56297	0.239857
0.623609	0.63248	0.540256	0.180939
0.708351	0.729181	0.548987	0.41725
0.582892	0.567922	0.583935	0.573988
0.529899	0.665762	0.607166	0.407478
0.599118	0.6502	0.522302	0.400659
0.577441	0.593792	0.711139	0.221053
0.552758	0.600861	0.630444	0.258668
0.593722	0.241909	0.535652	0.313645
0.602712	0.562738	0.653837	0.354164
0.615317	0.663318	0.653082	0.507607
0.648415	0.662454	0.600436	0.310977
0.51598	0.686108	0.570121	0.339946
0.642765	0.560639	0.625599	0.208198
0.558631	0.387693	0.523067	0.472712
0.473182	0.459145	0.5745	0.608342
0.613409	0.65602	0.598358	0.338104
0.722297	0.533209	0.569119	0.383922
0.613832	0.309378	0.313175	0.401304
0.576758	0.543864	0.598141	0.582566
0.647566	0.692315	0.506314	0.202536
0.48274	0.742114	0.555762	0.123602
0.558533	0.506191	0.656761
0.566518	0.624157	0.452161
0.60543	0.325986	0.564379
0.644114	0.575279	0.691894
0.638976	0.587152	0.514339
0.581392	0.551119	0.440095
0.630947	0.60043	0.520285
0.637179	0.69411	0.706343
0.588235	0.438869	0.626671
0.583542	0.605254	0.570263
0.517208	0.354527	0.644068
0.631285	0.457625	0.74614
0.642441	0.573567	0.579249
0.608569	0.727859	0.621012
0.598947	0.703766	0.608039
0.641664	0.555723	0.635729
0.579444	0.677906	0.649871
0.577262	0.442087	0.645933
0.654733	0.650699	0.617519
0.614267	0.643511	0.516518
0.634926	0.701964	0.546409
0.668097	0.468887	0.574655
0.524673	0.55867	0.481436
0.552482	0.612518	0.551485
0.559861	0.408668	0.608716
0.629965	0.348453	0.524922
0.642345	0.62062	0.599902
0.538023	0.60686	0.574327
0.751822	0.528507	0.593463
0.587196	0.578723	0.635147
0.731289	0.522385	0.606329
0.447592	0.519926	0.615159
0.536965	0.473436	0.696119
0.647733	0.605044	0.450476
0.53886	0.679633	0.675306
0.810776	0.726734	0.541545
0.510035	0.598649	0.562049
0.567472	0.233137	0.666688
0.745256	0.516287	0.564719
0.587639	0.643989	0.416973
0.628666	0.673694	0.728487
0.718587	0.582344	0.482508
0.635872	0.42028	0.582367
0.492576	0.650229	0.589742
0.559529	0.500136	0.557511
0.616602	0.350213	0.56037
0.501615	0.490473	0.514163
0.578065	0.42541	0.578259
0.594163	0.697348	0.629851
0.609147	0.461555	0.646913
0.476011	0.524993	0.677132
0.648681	0.52489	0.662955
0.526188	0.548623	0.618278
0.567777	0.461279	0.700344
0.520478	0.440873	0.519289
0.645713	0.308792	0.617333
0.584693	0.513042	0.676664
0.568474	0.577343	0.780465
0.590068	0.380124	0.507017
0.692072	0.527005	0.57529
0.529294	0.73948	0.595689
0.644832	0.503169	0.684234
0.727605	0.630737	0.644595
0.614776	0.560281	0.481019
0	0.674074	0.542183
0.550082	0.709505	0.590675
0.582086	0.70348	0.585741
0.482198	0.602878	0.628567
0.57971	0.511453	0.490797
0.59945	0.437421	0.482195
0.526856	0.62282	0.503055
0.491763	0.706183	0.613778
0.65541	0.513532	0.452481
0.620567	0.755075	0.610765
0.602449	0.722231	0.469722
0.57943	0.71782	0.381494
0.705182	0.607627	0.528915
0.572242	0.718595	0.50851
0.654786	0.548565	0.50731
0.561128	0.663627	0.613142
0.564203	0.662461	0.633202
0.573487	0.271198	0.633673
0.573045	0.657407	0.506571
0.577549	0.404403	0.464079
0.547634	0.653136	0.671823
0.508222	0.646419	0.490061
0.696322	0.378407	0.634406
0.641053	0.430964	0.339208
0.623787	0.518321	0.644371
0.676929	0.495934	0.454675
0.625856	0.684418	0.503624
0.601465	0.543581	0.688454
0.525674	0.406329	0.509896
0.560062	0.471575	0.54423
0.569522	0.366774	0.609064
0.631239	0.5377	0.603264
0.637586	0.603406	0.674534
0.603016	0.48486	0.489275
0.576535	0.306715	0.541695
0.584927	0.615897	0.550111
0.66322	0.419673	0.613496
0.603484	0.611142	0.580624
0.568273	0.43733	0.616772
0.53697	0.555559	0.58123
0.563813	0.32573	0.473786
0.507031	0.465676	0.619543
0.61675	0.71777	0.65056
0.54476	0.571247	0.62915
0.701252	0.592914	0.6305
0.482752	0.479291	0.518515
0.521546	0.524529	0.488204
0.599577	0.714201	0.495934
0.684224	0.517818	0.629436
0.599062	0.637223	0.554172
0.534419	0.627258	0.783213
0.582737	0.558357	0.619364
0.68423	0.454276	0.567097
0.536332	0.675463	0.559279
0.592464	0.486718	0.616902
0.657547	0.651993	0.562205
0.565229	0.55875	0.577163
0.760228	0.428921	0.574446
0.541428	0.670049	0.551022
0.528783	0.525296	0.559678
0.638622	0.576576	0.62916
0.632157	0.640597	0.524495
0.54503	0.296792	0.726378
0.641991	0.559445	0.575396
0.555607	0.534676	0.580664
0.483423	0.459397	0.549042
0.687399	0.404895	0.551385
0.600376	0.471247	0.643866
0.577501	0.356064	0.503554
0.567213	0.339884	0.599695
0.543847	0.65235	0.519406
0.608274	0.611034	0.472522
0.497887	0.690242	0.52326
0.629918	0.351448	0.636732
0.672754	0.575737	0.666857
0.652702	0.591792	0.66252
0.629988	0.530009	0.613419
0.582478	0.520788	0.557386
0.634208	0.546633	0.545124
0.602636	0.522348	0.647904
0.620692	0.439489	0.608579
0.574784	0.560551	0.542415
0.58066	0.397384	0.468248
0.564338	0.58451	0.534375
0.657445	0.658994	0.855981
0.606012	0.608752	0.607966
0.68347	0.528964	0.536715
0.547523	0.002575	0.600587
0.707072	0.599251	0.724751
0.692077	0.400635	0.540189
0.65911	0.444351	0.58841
0.637571	0.671894	0.614756
0.554244	0.576667	0.56465
0.496071	0.609547	0.56813
0.627756	0.583761	0.575404
0.629281	0.204035	0.589941
0.622156	0.431435	0.577798
0.515593	0.469896	0.560865
0.584154	0.660378	0.663793
0.588765	0.363726	0.534863
0.505338	0.530962	0.551889
0.594869	0.299303	0.640964
0.537845	0.518904	0.624924
0.603369	0.480446	0.547914
0.524691	0.61787	0.511539
0.424672	0.28309	0.571038
0.545432	0.345394	0.568012
0.565711	0.621344	0.500165
0.665734	0.491344	0.578962
0.599705	0.63327	0.60402
0.564609	0.634891	0.569741
0.491168	0.249723	0.563099
0.598283	0.492579	0.553753
0.578473	0.54047	0.428209
0.63648	0.583556	0.595563
0.566402	0.402635	0.646689
0.546181	0.38299	0.504112
0.543336	0.527109	0.567601
0.661981	0.526388	0.561929
0.486804	0.570586	0.635378
0.466618	0.471471	0.42939
0.634919	0.335879	0.666465
0.56772	0.525264	0.605707
0.583677	0.421151	0.667183
0.559028	0.458406	0.631522
0.588013	0.543737	0.636975
0.628754	0.466924	0.651755
0.588674	0.401723	0.626309
0.657392	0.4997	0.597981
0.597113	0.643353	0.518112
0.581674	0.568218	0.582073
0.662022	0.427556	0.58899
0.631129	0.310574	0.626061
0.501272	0.62063	0.630969
0.624447	0.557308	0.647772
0.592333	0.615301	0.457411
0.522416	0.598919	0.544811
0.636404	0.243479	0.574763
0.638494	0.597468	0.535834
0.633343	0.590974	0.482429
0.454598	0.688005	0.572505
0.451559	0.642568	0.467709
0.5419	0.48429	0.57702
0.538514		0.585742
0.647214		0.601608
0.612145		0.552455
0.525525		0.635847
0.455588		0.635678
0.545039		0.540636
0.474416		0.630183
0.603659		0.611483
0.616288		0.630604
0.490601
0.54661
0.562783
0.579847
0.487286
0.469005
0.611512
0.670271
0.607429
0.538511
0.552624
0.652404
0.586759
0.522675
0.525456
0.540553
0.692471
0.732095
0.668306
0.544797
0.558893
0.536449
0.653783
0.482978
0.51893
0.577924
0.479167
0.582637
0.493841
0.639225
0.53405
0.666177
0.667774
0.565017
0.512741
0.602447
0.595542
0.639969
0.56195
0.666846
0.516146
0.493363
0.536461
0.568679
0.541373
0.657395
0.613563
0.5718
0.573308
0.492613
0.495421
0.698424
0.686264
0.726614
0.559469
0.528577
0.473621
0.569236
0.470028
0.603848
0.606299
0.573721
0.559879
0.529398
0.568503
0.621643
0.674079
0.633244
0.640361
0.690049
0.613951
0.643476
0.554011
0.667553
0.746966
0.680425
0.695283
0.629433
0.630202
0.67125
0.579937
0.583021
0.495015
0.530774
0.577722
0.596757
0.652639
0.655061
0.594466
0.619656
0.57036
0.573495
0.461886
0.627599
0.5882
0.725237
0.554745
0.537123
0.722441
0.555321
0.621807
0.583995
0.580588
0.55521
0.635611
0.680357
0.677509
0.631176
0.597834
0.643552
0.531353
0.515245
0.729072
0.397112
0.602035
0.542508
0.588804
0.52814
0.500199
0.548874
0.492825
0.52392
0.215125
0.633097
0.528527
0.638385
0.556552
0.640876
0.552018
0.522136
0.65845
0.611162
0.524081
0.582962
0.585747
0.540731
0.573704
0.630093
0.531503
0.703076
0.570304
0.571888
0.605591
0.567439
0.522275
0.530754
0.605618
0.603271
0.63529
0.629324
0.561286
0.641426
0.435317
0.50918
0.631699
0.580963
0.63779
0.599187
0.577537
0.645604
0.548567
0.570627
0.549494
0.819517
0.531581
0.57447
0.440364
0.503862
0.517013
0.600334
0.523831
0.665343
0.594232
0.5592
0.554092
0.501087
0.678017
0.718591
0.626293
0.667099
0.590668
0.504752
0.623237
0.592548
0.506746
0.66315
0.565502
0.50585
0.640591
0.550115
0.641478
0.5535
0.59602
0.559057
0.482698
0.559018
0.529857
0.580134
0.610783
0.55568
0.524193
0.479227
0.572199
0.568338
0.607589
0.654597
0.548014
0.513356
0.626957
0.536373
0.575065
0.580818
0.624964
0.551571
0.53098
0.567537
0.555764
0.695665
0.591199
0.64323
0.670843
0.53921
0.565359
0.533208
0.598649
0.633487
0.568268
0.602796
0.576318

## Sheet: Figure 5M
Ctl	Ctl (Glc+)	Pfkfb3OE	Pfkfb3OE (Glc+)
0	0.507377	0	0.335108
0.095666	0.140252	0.206519	0.532717
0	0.463748	0.295355	0.482935
0.363658	0	0.281286	0.567653
0	0.40697	0	0.582543
0.319385	0.570335	0	0.457687
0.334555	0.326019	0	0.503133
0	0.347147	0.36088	0.62439
0.307133	0.508039	0.39225	0.484956
0.191531	0.543042	0.22925	0.491808
0	0.630313	0	0.418254
0.194681	0	0	0.461536
0.250031	0.477889	0.304144	0.312958
0.205441	0.601048	0	0.560865
0	0.745146	0	0.531775
0.357196	0.429007	0	0.516374
0	0	0.387884	0.577643
0.362532	0.45024	0.207666	0.504848
0	0.427636	0.280833	0.40164
0.309035	0.462794	0.236664	0.516811
0	0.567135	0	0.579189
0.314241	0.283781	0.40008	0.235883
0.32567	0.328218	0.211396	0.555369
0	0.524786	0.414674	0.482017
0.351112	0	0.135036	0.452024
0.229259	0	0	0.424873
0	0.399124	0	0.578228
0.250337	0.507087	0.19935	0.53574
0.376259	0.5268	0.357567	0.342424
0	0.524713	0.173482	0.637387
0	0.532081	0.194731	0.590653
0.208769	0.596149	0	0.493523
0.230937	0.418382	0	0.373557
0.23184	0.344154	0.349487	0.431765
0.25785	0.63978	0.412116	0.413132
0.285722	0.304395	0	0.549842
0	0.569361	0.477587	0.48268
0.218441	0.560816	0	0.352031
0.374783	0.587337	0	0.568251
0.31598	0	0.301192	0.623914
0	0.340383	0	0.567718
0.301493	0.336025	0.239626	0.600085
0.380651	0.522884	0.158441	0.528984
0.46642	0.623714	0	0.590898
0	0.400882	0.434604	0.592786
0.120487	0.540629	0.232292	0.415336
0.244522	0.299284	0	0.566073
0.367632	0	0.376355	0.604824
0.291363	0.567849	0.265038	0.607432
0.233208	0.575116	0.33984	0.457032
0.488551	0.614265	0.309379	0
0.264853	0.36615	0	0.450829
0	0.500872	0.268987	0.702515
0	0.595187	0.321512	0.644686
0.122392	0.402032	0.3972	0.491824
0.276482	0.418972	0.131172	0.509671
0.46403	0.48394	0.420835	0.736701
0.257289	0.47959	0.321195	0.476089
0.305672	0.52176	0.381912	0.51668
0	0.462151	0.136215	0.534455
0	0.510786	0.299089	0.583887
0.330475	0.671133	0	0.607212
0.469094	0.527934	0	0.601748
0.400595	0.329766	0.378416	0.458813
0.245513	0.251997	0.143211	0.523829
0.289188	0.403309	0	0.498572
0.331378	0.506859	0.150362	0
0.267852	0.676892	0.133469	0.410888
0.491837	0.30323	0.326434	0.516544
0	0.41448	0.101713	0.61179
0	0	0	0.568032
0.416366	0.403393	0.206437	0.538521
0.194113	0.623254	0.474914	0.741256
0.179379	0.485253	0	0.582578
0	0.451396	0.312061	0.570001
0.408096	0.531571	0	0.601021
0.234008	0.658207	0.343527	0.320557
0.38769	0.344214	0.306362	0.48383
0	0.577078	0.253905	0.602562
0	0.514092	0.26681	0.555648
0	0.528245	0	0.520503
0.27848	0.460398	0.335121	0.506885
0.297297	0.564128	0	0.645426
0.448181	0.449775	0.223074	0.625399
0.379293	0.568189	0.244022	0.717941
0	0	0.263367	0.10855
0.264965	0.351413	0.173191	0.355509
0.253547	0	0.107706	0.434308
0.243047	0.557336	0.2769	0.427049
0	0.543423	0	0.378624
0	0.357331	0.309181	0.409211
0.307748	0	0.321971	0.399089
0.379212	0.226104	0	0.374402
0.226834	0.53846	0	0.466824
0.262993	0.558935	0.374361	0.476561
0.298827	0	0	0.557974
0.200686	0.61676	0.405503	0.336666
0.231608	0.634695	0.326801	0.449603
0	0.323385	0.318243	0.596171
0.220499	0.481817	0.237729	0.45154
0	0.477444	0.258943	0.651928
0.240573	0.453852	0	0.478795
0.367091	0.57341	0	0.564673
0	0	0.243481	0.391456
0	0.431256	0.285883	0.415732
0.504027	0.449862	0.238797	0.368856
0.237285	0.473048	0	0
0.37594	0.353866	0.386622	0.659714
0	0.524126	0.13018	0.708911
0.264438	0	0	0.531949
0.187683	0.495446	0.388149	0.538713
0	0.579566	0	0.615322
0	0.798097	0	0.581623
0	0.30014	0	0.545562
0.351118	0.482739	0	0.567895
0.142169	0.377911	0.376908	0.630762
0.430246	0	0	0.493209
0	0.572398	0.322747	0.589334
0	0.352234	0.37557	0.589083
0.124671	0.447879	0	0.617961
0	0.580696	0.230139	0.615693
0.344751	0.393995	0.305548	0.499304
0.463212	0.463381	0	0.376483
0.306897	0.31865	0.216106	0.559049
0	0.420472	0	0.554502
0	0.458066	0.315004	0.536782
0	0.552558	0.120698	0.597626
0	0.326304	0.317905	0.152838
0.285921	0.62576		0.548816
0.305546	0.622169		0.250251
0.314043	0.467398
0	0.162002
0.257999	0.499143
0.412006	0.596795
0	0.299407
0	0.407079
0.427824	0.505795
0	0.557653
0	0.382998
0	0.579004
0.420558	0.540825
0	0.436615
0.243183	0.482487
0.100656	0.134075
0	0.416967
0	0.571615
0	0.367767
0	0.496992
0	0.487581
0	0.478322
0.363855	0.448295
0	0.390678
0.153917	0.267711
0	0
0	0.116752
0	0.594121
0	0.54502
0.287978	0.382965
0	0.628016
0.272865	0.620694
0.412095	0.295945
0	0.391767
0	0.757512
0	0.465998
0.351228	0.389195
0.277882	0.527674
0	0.422562
0	0.320105
0	0.490265
0.412556	0.545297
0.375176	0.549068
0.394425	0.594007
0.332063	0.504442
0.290708	0.394027
0.251326	0.21906
0.250811	0.527473
0.384889	0.44153
0.217388	0.175582
0.158633	0.415632
0.346355	0.661114
0.448572	0.578374
0	0.720973
0.214849	0.578386
	0.548008
	0.416394
	0.343675
	0.446124
	0.566803
	0.634487
	0.531678
	0.413225
	0.484911
	0.420781
	0.72366
	0
	0.373346
	0.634885
	0.490708
	0.443849
	0.523713
	0.526838
	0.379009
	0.703284
	0.474863
	0.514206
	0.44766
	0.734434
	0.583983
	0.537578
	0.291513
	0.519482
	0.479271
	0.615077
	0.45361
	0.422876
	0.546957
	0.367964
	0.429631
	0.449375
	0.5474
	0.587069
	0.36539
	0.484019
	0.500862
	0.473501
	0.687736
	0.564279
	0.590971
	0.468016
	0.466187
	0.542419
	0.5642
	0.458929
	0.432202
	0.509912
	0.421771
	0.694922
	0.343621
	0
	0.604009
	0.400524
	0.426558
	0.538976
	0.30971
