# Supplementary material for: Context-dependent modification of PFKFB3 in hematopoietic stem cells promotes anaerobic glycolysis and ensures stress hematopoiesis
Source: eLife. 2024 Apr 4;12:RP87674. doi: 10.7554/eLife.87674 (PMC10994660; doi:10.7554/eLife.87674)
Supplement: Figure 6—figure supplement 1—source data 1. [file elife-87674-fig6-figsupp1-data1.xlsx]

## Sheet: Figure 6－Figure Supplement 1
	PBS			5-FU
Hoxa7	300.058	321.39	325.692	326.243	362.489	350.686
Hoxa9	2419.41	2844.62	2810.15	2723.78	2834.66	2960.51
Hoxa10	1402.38	1244.06	1225.28	1104.3	1270.78	999.668
Itga2b	2187.79	2075.2	2421.5	618.453	518.877	683.196
Bcl2l11	754.882	909.895	880.215	692.386	361.453	513.198
Hmox1	148.45	101.099	147.711	138.477	121.175	156.098
Nqo1	265.314	237.317	191.298	160.774	132.567	156.098
Gclm	846.479	892.867	858.421	854.334	796.44	793.319
