# Supplementary material for: Context-dependent modification of PFKFB3 in hematopoietic stem cells promotes anaerobic glycolysis and ensures stress hematopoiesis
Source: eLife. 2024 Apr 4;12:RP87674. doi: 10.7554/eLife.87674 (PMC10994660; doi:10.7554/eLife.87674)
Supplement: Figure 6—source data 1. [file elife-87674-fig6-data1.xlsx]

## Sheet: Figure 6A
PBS	5-FU
5025.18	3361.01
4097.19	4345.73
4507.62	3574.21

## Sheet: Figure 6B
PBS	5-FU
14785.1	13951
14112.9	10733.1
14313	15973.3
13872	15652.5
12729	13332.7
12988.3	15659.6
10873.5	13068.7
12108.3	15815.2
13295.7	14131.1
12280	9669.54
12564.6	10576.6
14631.7	9900.68
14187.3	11686.4
12946.9	14963.5
12138.8	16197.8
14972.7	15567.8
15500.6	11126.1
14050.1	10145
14362.5	17511.1
13337	17900.6
11232.6	14990
12128.5	19660.7
13383.7	13741.3
13151	15236.6
15537.6	13437.9
13930.6	15450.9
14116

## Sheet: Figure 6C
PBS	5-FU
20871.6	23528
21282.8	21588.1
21893.7	24151.4
21570.9	22568.2
23239.5	24458.5
18680.2	22883.1
21358	20726.2
19686.2	20197.6
21054.1	23327.9
21108	19498.9
21146	15913.6
18248.6	23099.2
18926.3	19891.4
21863.6	21776.2
20913.3	20869
21584.1	19786.8
20037.3	20024.5
17330.5	20166
19995.7	21990.9
19129.1	23678.2
21615.4	21902.2
19680.5	20126.8
20894.3	20943.9
20073.8	20450.3
22424.1	23932.6
21738.1	19970.4
20315.8	23415.3

## Sheet: Figure 6D
Glc	Glc+ Oligo	Glc+ Oligo+ AMPKi
18007.1	28839.7	16044
16545.8	28612.2	16431.2
18361.1	24057.1	15562.2
14805.9	27189.5	15745.7
16996.6	26550.4	14292.6
19990.8	24935.8	17133.3
16637.3	26558.9	17041.8
17685.2	16978.7	15470.1
20146	28221.6	15892.5
16564.1	25042.5	15340.1
15540.3	25834.8	18080.1
17946.5	25536.5	16416.6
16990.5	22564.8	15614.6
20667.1	26251.1	15559.3
15430.8	22511.8	17129.8
16438.8	23429.8	16970
17998.8	22268.3	15872.5
16946.1	26966.3	15354
18222.1	21799.9	13853.9
17700.1	24093.4	19558.6
18367.9	26031.2	16957.5
19379.9	21473.7	15773.9
17854.1	23982.6	20772.4
14444.2	23930.6	18316.1
15361.3	21124.8	26293.1
16452.9	24992.7	15904.1
15174	20101.8	14581.7
15398.8	23794.9	17134.8
15381.1	17884.2	16193.9
13446.3	20987.9	16965.3
16108.7	25299.9	16606.6
16474	24347.6	17090.7
15108.4	23042.4
15611.6	25788.7
	24128.2
	21868.5

## Sheet: Figure 6E
PBS	5-FU
3224.83	4513.42
3276.68	5042.74
3140.68	4903.18

## Sheet: Figure 6F
PBS	5-FU
4186.48	7547.18
4186.78	7949.28
4231.44	5971.47
4718.38	7280.79
4373.01	6844.55
3168.74	3202.86
3598.37	2825.62
4051.57	2823.57
4012.98	3157.11
3790.88	3878.12
4299.26	3080
4239.63	3049.15
4139.05	2780.56
4223.36	2863.64
3720.56	6502.67
3588.24	6995.96
4540.75	5048.77
4548.11	6499.45
4438.58	5070.44
4806.91	5084.22
3496.59	9644.02
3989.18	4980.54
3864.13	5121.13
	3822.05
	3859.13
	4674.64
	3867.85
	3709.93
	2510.36
	3271.22
	3018.6
	3176.24
	4024.25
	2961.19
	4464.99
	3219.17
	12670
	13013
	8608.18
	10563.5
	9151.18

## Sheet: Figure 6G
PBS	5-FU	5-FU PRMTi
13162	4793.25	8319.41
9675.8	6204.51	9335.07
10093.1	4493.62	8347.93
6433.47	5087.12	7892.23
6142.18	4048.51	8631.45
5379.67	9919.8	9156.43
7193.78	10036.8	8747.08
12172	9894.57	4316.45
10081.5	8024.67	4508.93
10553.5	9888.7	4665.22
9631.45	9481.15	7812.17
7109.09	9406.85	7136.94
8458.47	10406	7861.94
6463.38	22313.5	8625.93
4462.7	9805.18	7615.98
5460.89	9791.85	8176.79
4798.99	7933.86	7640.29
5914.18	9166.32	7372.95
3524.82	9117.71	8488.34
3229.85	8102.77	5800.4
3654.31	9527.8	8341.42
3470.41	13255.1	7133.8
5207.12	13052.9	7980.43
4151.34	8228.98	5577.22
4151	9419.02	6654.48
	8474.25	6420.67
	8756.04	5849.95
	8677.86	5108.16
	7935.82	5168.51
	8033	4856.87
	7285.4	5492.45
	7092.22	5147.05
	6483	4907.32
		4516.4
		4259.36

## Sheet: Figure 6H
PBS NBDG low	PBS NBDG high	5-FU NBDG low	5-FU NBDG high
8581.56	12999.2	10658.3	31967.2
17329.7	28613.7	26616.8	27917.3
7396.73	25234.8	3841.86	21663.6
19564.6	21841.8	3225.14	21940.6
17775.9	21111.2	4998.32	21978.9
9228.92	19077	19339.6	26526.1
19922.4	15175.1	16084.9	21722.9
18319	12158.6	24923.6	26596.1
18010.2	19332.3	20946.3	12681
15944.3	10894.2	21774.9	13703.9
23179.9	21824.2	18057	15531.3
18539.2	19263.4	13406.1	23428.5
22834.4	11953.5	16590.7	29454.9
18677.4	3226.31	16347.8	24387
17623.2	16357.3	21265.2	23728.2
24213.4	17868.8	20921.8	24593.3
23283	21255.8	20418.2	27675.3
21370	17044.6	20903.2	24366.5
17353.3	16720.9	17173.4	25532.2
16168.5	8060.15	20258.2	16615.6
10783.6	18026.2	19034.9	17994
15547.5	15499.6	17188.8	23292.8
20442.9	21424.6	18553.5	24500.2
14974.6	17740.9	13477.5	21903.3
19859.3	20028.9	21033.4	17678.3
13534	18234.8	9911.19	16173.3
10909.1	19656.2	14208.9	19660.9
9414.72	21116.9	18872.4	21867.1
13916.4	20767	16297.7
7418.71	27158.7	21580.4
15589.9	14826.3	17367.1
5088.63	24555.9	20023.3
6113.62	17898.7	19894.7
	18272.8	6771.53
	27462	22480.2
	29187.8	12109.6
	27865.6	18179
	24423.9	16836.5
	24434.8	17128
	27931.6
	21626

## Sheet: Figure 6I
PBS (vehicle)	5-FU (vehicle)	PBS (PRMT1i)	5-FU (PRMT1i)
0.723509	0.969727	0.712717	0.413721
0.668419	0	0.762585	1.07079
0.76308	0	0.795867	0
0.660897	1.09936	0.674179	0.358766
0.733565	0.258234	0.76268	1.15424
0.729342	1.10096	0.545773	1.50256
0.646335	0.684652	0.477724	0.656543
0.692061	0	0.518772	0.76143
0.742115	1.93769	0.66392	0
0.646616	0.733362	0.625286	0.749373
0.396676	0	0.688094	0.296515
0.529341	1.09801	0.544858	0.975875
0.715739	1.11398	0.736546	1.15685
0.700618	0	0.651128	0
0.758634	0.905655	0.788664	0
0.350211	1.50161	0.726375	0.947301
0.650044	1.09795	0.693166	0.992767
0.723881	0.640883	0.71035	0
0.693053	0.951305	0.736012	1.21071
0.694333	0.928006	0.816226	1.09566
0.721141	0	0.158767	0.436054
0.645233	0	0.707883	0
0.71636	1.1323	0.646288	1.07366
0.762902	0	0.765051	1.3872
0.710235	1.09892	0.746897	1.11855
0.654474	0.25145	0.717298	0
0.744136	0	0.692622	0
0.78837	1.20344	0.629919	1.19424
0.693328	1.1597	0.648197	1.08302
0.56388	0.967245	0.720679	1.08195
0.708986	1.19807	0.678178	0
0.69996	0.161354	0.684759	0
0.661895	1.06908	0	0
0.721067	0	0.736485	0.325516
0.690938	4.1225	0.762348	0.986465
0.716351	0	0.806975	0.35403
0.659307	0.246745	0.716592	0.974958
0.807982	0.499992	0.705746	0.791709
0.700546	0	0.689241	0.570955
0.797258	0	0.734938	0
0.621487	0.655313	0.745143	0.529866
0.751479	0.993772	0.660798	0
0.929841	0	0.273909	0
0.77196	0.471236	0.847679	0.244388
0.748621	1.15535	0.616357	0
0.680803	1.69159	0.62723	0.848404
0.746628	0	0.5404	1.11893
0.76171	0.920077	0.79812	0
0.730153	1.02643	0.68182	1.00822
0.724841	1.2068	0.687324	1.18466
0.698074	0.419596	0.766078	0.805903
0.665159	0.295374	0.722369	0.697157
0.807656	0.762052	0.076451	1.11911
0.714736	1.00825	0.684779	1.02133
0.66342	0	0.70269	0
0.700503	1.11573	0.632307	0
0.59632	0	0.784994	0
0.719414	0	0.693803	1.96289
0.733163	0	0.717703	0
0.295513	0	0.769892	0
0.767787	1.05025	0.732973	0.563148
0.359855	1.10187	0.847842	1.01971
0.703557	0.907673	0.661107	0.982817
0.710964	0.763106	0.772888	1.39835
0.743948	0	0.405993	0.286834
0.767933	0	0.699975	0
0.661331	1.06874	0.732989	0.535421
0.7029	0	0.6762	0.174147
0.706197	0.941497	0.797823	0.811502
0.746243	0.998681	0.74306	0
0.803995	0.723113	0.745078	0
0.711665	0.868554	0.748652	0
0.782544	1.17435	0.754295	1.32678
0.806413	1.03882	0.753178	1.17674
0.767957	1.09639	0.662188	0.823348
0.733555	0	0.640664	0
0.751784	0.977878	0.740721	1.07967
0.699336	0	0.700018	0.816025
0.524297	2.09967	0.324646	0
0.909243	0	0.745449	0
0.769669	0	0.67479	1.11548
0.724702	0.570498	0.621643	1.18751
0.710823	1.17626	0.699123	0
0.717747	0.405954	0.717493	0
0.783818	1.09951	0.73654	0
0.728027	0.806546	0.720017	0.971299
0.751532	0.904067	0.747281	0.498862
0	0.32992	0.71754	0.96984
0.751881	0	0.796488	1.01801
0.81902	1.19969	0.813087	0.127341
0.691388	1.1316	0.772645	1.07851
0.691329	0.65406	0.874009	1.1379
0.676259	2.05606	0.289736	0
0.885101	1.04834	0.48037	0
0.79624	1.04581	0.747351	0
0.785228	1.15857	0.680229	0
0	0	0.8015	0.88689
0.640776	0	0.78671	0
0.744593	0	0.725992	0.395297
0.720588	0.770667	0.662824	0.171093
0.750342	1.07434	0.797581	0
	0.76277	0.764659	0.8863
	0.33187	0.773298	0
	0	0	0
	1.07764	0.740085	0
	0	0.644243	0
	0	0.708819	1.03444
	1.20676	0.669057	1.09451
	0	0.593703	0
	0	0.688537	0.848408
	1.13265	0.606125	0
	0	0.654518	0
	0		0
	1.24139		0.647916
	1.17489		1.25278
	1.11026		0
	0.968864		0
	0		1.02028
	0		0
	0		0
	1.14371		0.462587
	0.992486		0.967945
	0.649268		0.960937
	0.936364		0.993548
	0		0.980714
	0.752979		0
	1.08616		0
	1.2377		0.886187
	0		0.710487
	0.38133		0.720952
	0.377324		1.06657
	0		0
	1.26707		0
	0.395696		0
	0		1.14468
	0.879635		1.06183
	0.962568		0.422803
	1.04371		0.409319
	0		1.12683
	1.0841		1.12137
	0		0
	1.04353		0
	1.4083		0.948393
	1.18101		0.455878
	0.591538		1.19661
	1.44038		0
	0		0.897481
	0.401409		0.949302
	0		1.18884
	0		1.12531
	0		0
	0		0.196034
	1.02617		0
	0		0
	1.19745		0.230633
	0.517078		2.29346
	0.880359		0
	0.986891		0
	0		0
	1.28207		0

## Sheet: Figure 6J
Ctl	PFKFB3OE
0.463906	0.523918
0.462807	0.508992
0.471843	0.418799
0.580657	0.318539
0.484147	0.425139
0.546964	0.558234
0.477782	0.395833
0.357861	0.443351
0.394977	0.558136
0.667215	0.580037
0.575885	0.455817
0.517741	0.483504
0.428594	0.5041
0.539244	0.438575
0.450998	0.57501
0.590572	0.316319
0.510735	0.424742
0.47851	0.558202
0.52281	0.483901
0.495667	0.538104
0.450468	0.466074
0.533353	0.475463
0.429705	0.492348
0.578354	0.449964
0.525384	0.495268
0.452563	0.432864
0.509787	0.522964
0.455945	0.36913
0.483378	0.504735
0.545059	0.462278
0.619127	0.495984
0.570952	0.431993
0.515052	0.44721
0.547473	0.5677
0.53201	0.478768
0.544987	0.586654
0.721955	0.498478
0.395932	0.475898
0.524872	0.539155
0.372781	0.461518
0.529678	0.516437
0.477999	0.493051
0.481382	0.494143
0.456361	0.557744
0.543268	0.382484
0.655007	0.497181
0.50555	0.413798
0.543587	0.466549
0.468986	0.485055
0.519572	0.644592
0.588242	0.382029
0.452125	0.538935
0.518103	0.530229
0.524903	0.630103
0.506663	0.522751
0.537916	0.68761
0.426312	0.495097
0.507021	0
0.501629	0.522207
0.60312	0.52395
0.479877	0.503206
0.5594	0.534977
0.570694	0.516781
0.459117	0.534892
0.554044	0.462286
0.539083	0.516595
0.493972	0.579679
0.56819	0.488324
0.605649	0.472632
0.627281	0.472457
0.477042	0.609151
0.547237	0.457805
0.51447	0.390765
0.552833	0.347354
	0.420043
	0.423292
	0.642654
	0.536492
	0.509347
	0.437149
	0.523454
	0.58686
	0.448026
	0.491716
	0.595978
	0.596743
	0.472444
	0.46024
	0.656
	0.445681
	0.517272
	0.498647
	0.461708
	0.509564
	0.542944
	0.567847
	0.526065
	0.504951
	0.538889
	0.609944
	0.612199
	0.650816
	0.42341
	0.542983
	0.421737
	0.429176
	0.508909
	0.494922
	0.402868
	0.588125
	0.448297
	0.52621
	0.484768
	0.566055
	0.609848
	0.4511
	0.642782
	0.476053
	0.447743
	0.5774
	0.432857
	0.486323
	0.470127
	0.51137
	0.482294
	0.516899
	0.470935
	0.593533
	0.415641
	0.48299
	0.504125
	0.449951
	0.534996
	0.55662
	0.439896
	0.618328
	0.48127
	0.526451
	0.601792
	0.538793
	0.440228
	0.491022
	0.489061
	0.534023
	0.558103
	0.464871
	0.377367
	0.432436
	0.554958
	0.557289
	0.546514
	0.560445
	0.493371
