# Supplementary material for: Context-dependent modification of PFKFB3 in hematopoietic stem cells promotes anaerobic glycolysis and ensures stress hematopoiesis
Source: eLife. 2024 Apr 4;12:RP87674. doi: 10.7554/eLife.87674 (PMC10994660; doi:10.7554/eLife.87674)
Supplement: Figure 7—figure supplement 1—source data 1. [file elife-87674-fig7-figsupp1-data1.xlsx]

## Sheet: B
	None				3μM				10μM				30μM
Quiescent	633.515	800.345	613.768	670	606.295	588.788	649.62	778.065	666.898	602.261	616.307	596.069	454.086	570.84	526.083	469.233
Proliferative	2518.52	2249.12	2055.54	2438.46	2031.85	2158.28	2225.36	2309.11	2158.19	2201.72	2077.41	2186.98	1836.93	1909.5	1749.67	1863.82

## Sheet: C
	Pfkfb3 WT				Pfkfb3 KO
Quiescent	421.542	419.596	354.706	338.221	276.289	231.923	288.598	271.133
Proliferative	2146.06	1988.08	2126.71	2299.84	1861.22	1679.09	1805.59	1994.1

## Sheet: D
	Mock						Pfkfb3OE
Proliferative	1571.68	2255.04	2036.71	3158.57			3866.5	3260.59	2904.62	3362.12
Quiescent	288.761	239.15	254.105	282.656	332.964	284.434	328.338	413.824	287.143	346.074

## Sheet: G
Mock	PFKFB3CA
0.00123	0.024668
0.000959	0.014897
0.001156	0.015833
0.001159	0.009697

## Sheet: H
RosaKO	PFKFB3KO
0.00961145	0.00647834
0.00905923	0.00671463
0.00808824	0.00257009
0.00289436	0.00599613
