# Supplementary material for: Context-dependent modification of PFKFB3 in hematopoietic stem cells promotes anaerobic glycolysis and ensures stress hematopoiesis
Source: eLife. 2024 Apr 4;12:RP87674. doi: 10.7554/eLife.87674 (PMC10994660; doi:10.7554/eLife.87674)
Supplement: Figure 7—source data 1. [file elife-87674-fig7-data1.xlsx]

## Sheet: Figure 7B
Pfkfb3-KO (Recipient #)	2w	8w	16w		Rosa-KO (Recipient #)	2w	8w	16w
1	0.1	7.6	1.2		1	11.5	11.9	11.5
2	0.2	1.3	20.9		2	13.2	12.3	7.1
3	1.3	21.2	5.7		3	11.8	8.2	14.2
4	4.5	24.9	0.2		4	11.7	6.3	8.4
5	4.8	1.7	5.3		5	9.2
6	12.9	1.9	22.3		6

## Sheet: Figure 7C
Pfkfb3CA (Recipient #)	1M	2M	3M	4M		Mock (Recipient #)	1M	2M	3M	4M
1	16.75	25.41	16.38	10.29		1	8.54	18.48	6.32	2.63
2	30.14	11.84	13.12	8.84		2	10.22	8.49	4.21	4.47
3	19.74	15.74	16.28	15.66		3	9.54	4.12	20.81	1.56
4	23.34	27.6	9.34	10.3		4	8.28	6.5	2.25	23.35
5	28.27	15.25	21.09	15.81

## Sheet: Figure 7E
	RosaKO					Pfkfb3KO
Day1	8	21	17	19	17	7	3	4	100	8
Day4	28	18	7	16	17	7	2	2	68	1
Day6	20	15	16	21	15	5	0	4	11	6
Day10	20	18	19	16	18	7	0	6	15	3
Day15	14	19	14	30	14	4	2	4	8	6

## Sheet: Figure 7I
	G0					G1					SG2M
RosaKO	7.63573	13.7615	7.8712	5.13499	6.67088	55.9161	51.6383	59.034	60.8788	58.8173	36.4482	34.6003	33.0948	33.9862	34.5118
Pfkfb3KO	33.123	13.1961	18.4086	26.7039	18.9502	43.1125	52.4213	53.0879	47.0391	59.2435	23.7645	34.3826	28.5036	26.257	21.8063

## Sheet: Figure 7J
RosaKO	Pfkfb3KO
2.313	1.6362
3.1067	1.723
1.8031	1.5095
1.9979	1.7324
3.1521

## Sheet: Figure 7K
	Live					Apoptotic					Dead
RosaKO	94.368	92.8715	94.3453	88.2	93.6529	4.87903	6.4759	4.04193	11.6	5.61516	0.752936	0.65261	1.61274	0.2	0.731976
Pfkfb3KO	94.4731	91.0276	93.9624	97.1256	89.3613	4.02142	7.65915	5.58776	2.05749	10.0544	1.50551	1.31328	0.44982	0.816944	0.584324

## Sheet: Figure 7N
	G0					G1					SG2M
Mock	24.9234	36.2513	21.4654	29.2008	37.1901	63.1256	53.965	64.6027	51.4344	52.686	11.951	9.78373	13.9319	19.3648	10.124
Pfkfb3CA	21.2462	16.2669	26.1224	22.1538	18.2281	65.8836	46.194	62.551	65.8462	62.4236	12.8703	37.5391	11.3265	12	19.3483
