# Supplementary material for: Context-dependent modification of PFKFB3 in hematopoietic stem cells promotes anaerobic glycolysis and ensures stress hematopoiesis
Source: eLife. 2024 Apr 4;12:RP87674. doi: 10.7554/eLife.87674 (PMC10994660; doi:10.7554/eLife.87674)
Supplement: Supplementary file 1. — Composition of custom RPMI medium for culture (upper) and ATP analysis (lower). “-“ means 0 mg/L. [file elife-87674-supp1.xlsx]

## Sheet: Custom RPMI for cell culture
Custom RPMI medium for cell culture
Amino Acids	Concentration (mg/L)	Vitamins	Concentration (mg/L)
L-Arginine HCl	200	D-Biotin	0.2
L-Asparagine H2O	56.82	D-Calcium pantothenate	0.25
L-Aspartic acid	20	Choline chloride	3
L-Cystine 2HCl	65.2	Folic acid	1
L-Glutamic acid	20	i-Inositol	35
L-Glutamine	300	Niacinamide	1
Glycine	10	p-Aminobenzonic acid (PABA)	1
L-Histidine HCl H2O	15	Pyridoxine HCl	1
Hydroxy-L-proline	20	Riboflavin	0.2
L-Isoleucine	50	Thiamine HCl	1
L-Leucine	50	Vitamin B12	0.005
L-Lysine HCl	40	Inorganic Salts	Concentration (mg/L)
L-Methionine	15	Calcium nitrate (Ca(NO3)2 4H2O)	100
L-Phenylalanine	15	Potassium chloride (KCl)	400
L-Proline	20	Magnesium sulfate (MgSO4)	48.84
L-Serine	30	Sodium chloride (NaCl)	6000
L-Threonine	20	Sodium bicarbonate (NaHCO3)	2000
L-Tryptophan	5	Sodium phosphate (Na2HPO4)	800
L-Tyrosine 2Na 2H2O	28.83	Other componemts	Concentration (mg/L)
L-Valine	20	Glutathione reduced	1
Supplements	Concentration (mg/L)	HEPES	2383
Sodium lactate	112.1	Hypoxanthine	2.1
BSA	40000	Phenol red	5
Cholesterol	20	Sodium pyruvate	11
Oleic acid	100	Sugars	Concentration (mg/L)
Palmitic acid	100	D-Glucose	-

## Sheet: Custom RPMI for ATP analysis
Custom RPMI medium for ATP analysis
Amino Acids	Concentration (mg/L)	Vitamins	Concentration (mg/L)
L-Arginine HCl	-	D-Biotin	0.2
L-Asparagine H2O	-	D-Calcium pantothenate	0.25
L-Aspartic acid	-	Choline chloride	3
L-Cystine 2HCl	-	Folic acid	1
L-Glutamic acid	-	i-Inositol	35
L-Glutamine	-	Niacinamide	1
Glycine	-	p-Aminobenzonic acid (PABA)	1
L-Histidine HCl H2O	-	Pyridoxine HCl	1
Hydroxy-L-proline	-	Riboflavin	0.2
L-Isoleucine	-	Thiamine HCl	1
L-Leucine	-	Vitamin B12	0.005
L-Lysine HCl	-	Inorganic salts	Concentration (mg/L)
L-Methionine	-	Calcium nitrate (Ca(NO3)2 4H2O)	100
L-Phenylalanine	-	Potassium chloride (KCl)	400
L-Proline	-	Magnesium sulfate (MgSO4)	48.84
L-Serine	-	Sodium chloride (NaCl)	6000
L-Threonine	-	Sodium bicarbonate (NaHCO3)	2000
L-Tryptophan	-	Sodium phosphate (Na2HPO4)	800
L-Tyrosine 2Na 2H2O	-	Other componemts	Concentration (mg/L)
L-Valine	-	Glutathione reduced	1
Supplements	Concentration (mg/L)	HEPES	5960
Sodium lactate	-	Thymidine	0.3633
BSA	-	Phenol red	-
Cholesterol	-	Sodium pyruvate	-
Oleic acid	-	Sugars	Concentration (mg/L)
Palmitic acid	-	D-Glucose	-
