# Supplementary material for: Context-dependent modification of PFKFB3 in hematopoietic stem cells promotes anaerobic glycolysis and ensures stress hematopoiesis
Source: eLife. 2024 Apr 4;12:RP87674. doi: 10.7554/eLife.87674 (PMC10994660; doi:10.7554/eLife.87674)
Supplement: Supplementary file 2. — Results of tracer analysis using U-13C6-glucose with HSCs from mice treated with PBS or 5-FU. Each section contains raw data from the glycolytic system, TCA cycle, and P~NAS from top to bottom. Data from three individual experiments are described for each. All values represent average metabolite levels in single HSCs obtained by dividing the metabolite levels detected in HSCs (compared to internal standards) by the number of HSCs used in the analysis. [file elife-87674-supp2.xlsx]

## Sheet: Tracer analysis for cycling HSC
Tracer analysis for cycling HSCs
Class	G6P	F6P	F1,6BP	G3P+DHAP	3PG+2PG	PEP	PYR	LAC	Net_glycolysis
PBS_1	7.81455e-07	1.31671e-05	3.95787e-06	4.85114e-06	5.87893e-06	9.91737e-07	1.95868e-07	5.46577e-06	3.52899e-05
PBS_2	1.25391e-06	1.50876e-05	4.41648e-06	6.25909e-06	7.51644e-06	1.09499e-06	6.00854e-07	7.27792e-06	4.35073e-05
PBS_3	1.11286e-06	1.50161e-05	4.44416e-06	5.95409e-06	4.87629e-06	9.94443e-07	1.12487e-07	1.03747e-05	4.28851e-05
5-FU_1	1.6252e-06	2.19954e-05	2.59823e-05	3.58872e-05	1.44195e-05	2.13826e-06	1.39672e-06	1.7174e-05	0.000120619
5-FU_2	8.86027e-07	1.6577e-05	1.20811e-05	1.6128e-05	8.30154e-06	1.43566e-06	1.73096e-07	1.20866e-05	6.7669e-05
5-FU_3	1.67706e-06	1.82152e-05	1.96392e-05	2.59524e-05	1.26588e-05	1.79594e-06	7.39183e-07	1.42261e-05	9.49039e-05
Class	CIT	ACO	2OG	SUC	FUM	MAL	OAA	CIT_1	2OG_1	2OG_2	SUC_1	MAL_1	Net_TCA cycle
PBS_1	1.5801e-05	2.6102e-07	3.6192e-07	1.71827e-06	3.08996e-08	3.90895e-06	0	2.8933e-07	1.2347e-07	4.97802e-06	9.75241e-08	2.95107e-06	2.2082e-05
PBS_2	1.8952e-05	1.67203e-07	8.26637e-07	2.99096e-06	2.56591e-08	4.76502e-06	0	1.6341e-07	2.39362e-07	5.51739e-06	8.88354e-08	3.47816e-06	2.77275e-05
PBS_3	3.4666e-05	3.24919e-07	3.2461e-07	6.27661e-06	4.2576e-08	5.58307e-06	0	8.97276e-08	7.78742e-08	1.0974e-05	1.36506e-07	3.34289e-06	4.72178e-05
5-FU_1	3.54298e-05	3.53733e-07	1.05624e-06	6.6506e-06	3.63668e-08	8.23764e-06	0	3.12272e-07	3.16354e-07	8.69721e-06	2.78887e-07	6.13036e-06	5.17644e-05
5-FU_2	2.24023e-05	2.50384e-07	4.56695e-07	5.10245e-06	5.57968e-08	5.91177e-06	0	4.33205e-07	1.31093e-07	9.13338e-06	1.49108e-07	3.84416e-06	3.41794e-05
5-FU_3	2.33881e-05	2.6254e-07	8.0136e-07	4.17237e-06	4.64577e-08	6.82013e-06	0	5.887e-07	2.12749e-07	5.52254e-06	1.48639e-07	5.90224e-06	3.54909e-05
Class	6PG	Ru5P+Xu5P+R5P	S7P	E4P	PRPP	IMP	ATP	GTP	UTP	TTP	Net_PPP/Nucleotide synthesis
PBS_1	5.13886e-07	6.14857e-07	1.47098e-06	8.706e-08	4.29099e-06	4.14657e-09	6.26533e-07	1.65507e-07	1.31462e-07	0	7.90542e-06
PBS_2	1.52904e-06	1.65559e-06	1.91697e-06	9.6642e-08	5.88169e-06	5.09802e-09	7.52672e-07	2.10031e-07	1.59254e-07	0	1.2207e-05
PBS_3	1.91583e-06	6.88512e-07	1.40404e-06	0	1.66283e-06	0	3.31967e-07	3.67157e-08	1.19539e-08	0	6.05185e-06
5-FU_1	1.89282e-06	3.61256e-06	1.88557e-06	1.75379e-07	8.63577e-06	3.27361e-08	1.4319e-06	4.30711e-07	3.43434e-07	0	1.84409e-05
5-FU_2	1.50582e-06	1.89426e-06	1.27174e-06	4.32056e-07	7.65256e-06	1.9287e-08	9.25104e-07	2.00355e-07	2.29288e-07	0	1.41305e-05
5-FU_3	3.02814e-06	3.19842e-06	1.86478e-06	1.79321e-07	8.6395e-06	2.01566e-08	1.23339e-06	3.9664e-07	3.79556e-07	0	1.89399e-05
