# Supplementary material for: Context-dependent modification of PFKFB3 in hematopoietic stem cells promotes anaerobic glycolysis and ensures stress hematopoiesis
Source: eLife. 2024 Apr 4;12:RP87674. doi: 10.7554/eLife.87674 (PMC10994660; doi:10.7554/eLife.87674)
Supplement: Supplementary file 3. — Results of tracer analysis using U-13C6-glucose with HSCs treated with DMSO (Oligomycin-) or oligomycin (Oligomycin+). Each section contains raw data from the glycolytic system, TCA cycle, and P~NAS from top to bottom. Data from four individual experiments are described for each. All values represent average metabolite levels in single HSCs, obtained by dividing the metabolite levels detected in HSCs (compared to internal standards) by the number of HSCs used in the analysis. [file elife-87674-supp3.xlsx]

## Sheet: Analysis
Tracer analysis for Oligomycinmycin-treated HSCs
Class	G6P	F6P	F1,6BP	G3P+DHAP	3PG+2PG	PEP	PYR	LAC	Net_glycolysis
Oligomycin-_1	3.11106e-07	2.24492e-06	1.27771e-05	1.34491e-05	9.77747e-06	6.58316e-07	4.47546e-07	8.40795e-06	4.80735e-05
Oligomycin-_2	4.17895e-07	0	2.55698e-05	2.46335e-05	2.07055e-05	3.83056e-07	1.52916e-07	7.9852e-06	7.98479e-05
Oligomycin-_3	4.31171e-07	4.64211e-06	2.36893e-05	2.25352e-05	1.38996e-05	4.39549e-07	2.06146e-07	6.94516e-06	7.27882e-05
Oligomycin-_4	7.3808e-07	7.6682e-06	2.22035e-05	2.23432e-05	2.73273e-05	9.07566e-07	1.78554e-07	6.17189e-06	8.75383e-05
Oligomycin+_1	4.15938e-08	1.84825e-06	2.46251e-05	2.34282e-05	4.33732e-05	8.16781e-07	3.80024e-07	1.41174e-05	0.000108631
Oligomycin+_2	7.22549e-08	8.87948e-07	1.26733e-05	1.12278e-05	8.28697e-05	3.50595e-07	6.5229e-08	7.23536e-06	0.000115382
Oligomycin+_3	9.81315e-08	1.52713e-06	2.35405e-05	2.17422e-05	9.39286e-05	5.64091e-07	1.85196e-07	1.00667e-05	0.000151653
Oligomycin+_4	1.37435e-07	1.82301e-06	2.99229e-05	2.71898e-05	0.000117981	8.36334e-07	1.70292e-07	8.87817e-06	0.000186939
Class	CIT	ACO	2OG	SUC	FUM	MAL	OAA	CIT_1	2OG_1	2OG_2	SUC_1	MAL_1	Net_TCA cycle
Oligomycin-_1	4.29199e-05	4.27735e-07	1.65598e-07	2.70118e-05	4.63361e-08	4.54527e-06	0	3.54178e-07	8.116e-08	0	1.66961e-07	1.42912e-06	7.51166e-05
Oligomycin-_2	1.9631e-05	1.44921e-07	0	9.89474e-06	5.01996e-09	2.7956e-06	0	7.75697e-07	0	0	5.48957e-08	8.8571e-07	3.24713e-05
Oligomycin-_3	2.60164e-05	3.23798e-07	6.49475e-08	1.70347e-05	7.39574e-08	4.1342e-06	0	7.9238e-07	5.45508e-08	0	5.06021e-08	1.47187e-06	4.7648e-05
Oligomycin-_4	1.89021e-05	2.30889e-07	1.48487e-07	1.41385e-05	6.62393e-08	3.17917e-06	0	5.26141e-07	5.83062e-08	0	1.32731e-07	1.13914e-06	3.66655e-05
Oligomycin+_1	4.88716e-05	5.77246e-07	3.89921e-08	2.84814e-05	1.32499e-07	5.21902e-06	0	2.02135e-07	6.14758e-08	3.03559e-07	1.91864e-07	3.67768e-06	8.33207e-05
Oligomycin+_2	1.991e-05	2.6953e-07	0	1.05082e-05	2.6613e-08	2.39998e-06	0	5.91067e-08	3.47772e-08	0	1.03854e-07	1.41523e-06	3.31143e-05
Oligomycin+_3	2.42159e-05	2.42529e-07	0	1.50508e-05	2.7411e-08	3.76858e-06	0	1.05471e-07	0	0	1.17564e-07	2.39538e-06	4.33052e-05
Oligomycin+_4	2.04435e-05	2.35983e-07	1.6769e-08	1.56949e-05	4.22317e-08	3.25214e-06	0	1.01419e-07	6.0232e-08	0	1.52751e-07	2.28464e-06	3.96856e-05
Class	6PG	Ru5P+Xu5P+R5P	S7P	E4P	PRPP	IMP	ATP	GTP	UTP	TTP	Net_PPP/Nucleotide synthesis
Oligomycin-_1	2.74497e-06	7.1814e-07	5.3911e-07	2.11257e-07	0	0	6.7427e-08	0	7.79192e-08	0	4.35883e-06
Oligomycin-_2	6.16194e-06	8.49362e-07	4.85356e-07	2.91925e-07	0	2.26247e-07	4.63879e-08	0	0	0	8.06122e-06
Oligomycin-_3	6.0462e-06	1.90386e-06	1.28045e-06	3.02647e-07	0	1.11636e-07	5.28221e-08	0	0	0	9.69762e-06
Oligomycin-_4	5.5091e-06	1.01549e-06	8.04827e-07	2.77841e-07	0	3.13704e-07	1.40972e-07	0	0	0	8.06193e-06
Oligomycin+_1	2.28255e-06	5.44283e-07	3.31023e-07	6.84403e-07	0	3.09078e-07	0	0	0	0	4.15134e-06
Oligomycin+_2	4.0229e-06	7.16405e-07	8.83898e-07	9.78742e-08	0	2.48159e-07	0	0	0	0	5.96924e-06
Oligomycin+_3	6.39138e-06	1.76928e-06	1.51866e-06	1.77477e-07	0	4.03283e-07	0	0	0	0	1.02601e-05
Oligomycin+_4	8.60634e-06	1.18851e-06	9.28715e-07	2.41606e-07	1.07087e-08	3.05123e-07	0	0	0	0	1.1281e-05
