# Supplementary material for: Context-dependent modification of PFKFB3 in hematopoietic stem cells promotes anaerobic glycolysis and ensures stress hematopoiesis
Source: eLife. 2024 Apr 4;12:RP87674. doi: 10.7554/eLife.87674 (PMC10994660; doi:10.7554/eLife.87674)
Supplement: Supplementary file 5. — Results of tracer analysis during continuous in vivo administration of U-13C6-glucose to mice treated with 5-FU or PBS. A sheet is prepared for each metabolite and each contains two tables. The A.U. table (left) shows the metabolite levels detected in the four biological replicates in the 5-FU and PBS groups, obtained by dividing the metabolite levels detected in HSCs (compared to internal standards) by the number of HSCs used in the analysis. The ratio table (right) shows the calculated percentage of labeled metabolites among detected metabolites, where 12 C indicates unlabeled metabolites and 13Cn indicates n-carbon labeled metabolites by U-13C6-glucose. [file elife-87674-supp5.xlsx]

## Sheet: G6P
A.U.	12C	13C1	13C2	13C3	13C4	13C5	13C6	non M+0		Ratio	12C	13C1	13C2	13C3	13C4	13C5	13C6	non M+0
PBS_1	5.80886e-07	0	0	0	8.62662e-08	0	0	8.62662e-08		PBS_1	87.0695	0	0	0	12.9305	0	0	12.9305
PBS_2	1.35843e-06	0	0	0	0	0	0	0		PBS_2	100	0	0	0	0	0	0	0
PBS_3	2.55659e-07	0	0	0	0	0	0	0		PBS_3	100	0	0	0	0	0	0	0
PBS_4	2.41908e-07	0	0	0	0	0	0	0		PBS_4	100	0	0	0	0	0	0	0
5-FU_1	2.5528e-07	0	0	0	1.57146e-08	0	0	1.57146e-08		5-FU_1	94.2011	0	0	0	5.79886	0	0	5.79886
5-FU_2	1.52807e-07	0	0	0	0	0	0	0		5-FU_2	100	0	0	0	0	0	0	0
5-FU_3	3.3391e-07	0	0	0	0	0	0	0		5-FU_3	100	0	0	0	0	0	0	0
5-FU_4	3.22676e-07	0	0	0	0	0	0	0		5-FU_4	100	0	0	0	0	0	0	0

## Sheet: F6P
A.U.	12C	13C1	13C2	13C3	13C4	13C5	13C6	non M+0		Ratio	12C	13C1	13C2	13C3	13C4	13C5	13C6	non M+0
PBS_1	3.82546e-08	0	0	0	2.66088e-07	0	0	2.66088e-07		PBS_1	12.5696	0	0	0	87.4304	0	0	87.4304
PBS_2	2.92077e-07	0	0	0	7.12987e-08	0	0	7.12987e-08		PBS_2	80.3788	0	0	0	19.6212	0	0	19.6212
PBS_3	2.31063e-07	0	0	0	4.92156e-08	0	0	4.92156e-08		PBS_3	82.4405	0	0	0	17.5595	0	0	17.5595
PBS_4	9.36583e-07	0	0	0	0	0	0	0		PBS_4	100	0	0	0	0	0	0	0
5-FU_1	1.3691e-06	0	0	0	1.57146e-08	0	0	1.57146e-08		5-FU_1	98.8652	0	0	0	1.13478	0	0	1.13478
5-FU_2	5.26112e-07	0	0	0	0	0	0	0		5-FU_2	100	0	0	0	0	0	0	0
5-FU_3	1.1118e-06	0	0	0	2.64661e-07	0	0	2.64661e-07		5-FU_3	80.7723	0	0	0	19.2277	0	0	19.2277
5-FU_4	1.60739e-06	0	0	0	0	0	0	0		5-FU_4	100	0	0	0	0	0	0	0

## Sheet: F1,6BP
A.U.	12C	13C1	13C2	13C3	13C4	13C5	13C6	non M+0		Ratio	12C	13C1	13C2	13C3	13C4	13C5	13C6	non M+0
PBS_1	7.46386e-07	0	0	1.00182e-07	9.43861e-08	1.58312e-07	8.99375e-09	3.61874e-07		PBS_1	67.3476	0	0	9.03958	8.5166	14.2847	0.81152	32.6524
PBS_2	1.13636e-06	0	0	0	3.74706e-07	2.59308e-08	0	4.00637e-07		PBS_2	73.9338	0	0	0	24.3791	1.6871	0	26.0662
PBS_3	2.5603e-07	0	0	5.47464e-07	3.12438e-07	2.40185e-08	0	8.83921e-07		PBS_3	22.4597	0	0	48.0252	27.4081	2.10698	0	77.5403
PBS_4	2.03162e-07	0	0	3.27197e-08	9.31368e-08	7.95409e-08	0	2.05397e-07		PBS_4	49.7264	0	0	8.00857	22.7964	19.4686	0	50.2736
5-FU_1	3.70181e-07	4.4436e-09	0	7.34877e-07	9.03862e-08	2.29813e-08	0	8.52688e-07		5-FU_1	30.2715	0.363375	0	60.0945	7.39133	1.87929	0	69.7285
5-FU_2	9.37546e-08	0	0	1.21333e-07	1.28387e-09	0	0	1.22617e-07		5-FU_2	43.3304	0	0	56.0762	0.593364	0	0	56.6696
5-FU_3	2.85072e-07	0	0	6.85955e-09	3.06569e-07	1.29847e-07	0	4.43275e-07		5-FU_3	39.1396	0	0	0.941798	42.091	17.8276	0	60.8604
5-FU_4	3.35661e-07	6.47256e-09	0	6.04344e-07	1.00003e-07	1.00623e-07	0	8.11442e-07		5-FU_4	29.2616	0.564252	0	52.6843	8.7179	8.7719	0	70.7384

## Sheet: DHAP+G3P
A.U.	12C	13C1	13C2	13C3	non M+0		Ratio	12C	13C1	13C2	13C3	non M+0
PBS_1	2.15246e-06	0	0	7.93744e-09	7.93744e-09		PBS_1	99.6326	0	0	0.367407	0.367407
PBS_2	3.19507e-06	0	1.51214e-07	0	1.51214e-07		PBS_2	95.4811	0	4.51887	0	4.51887
PBS_3	1.1572e-06	1.88625e-08	0	1.91431e-08	3.80056e-08		PBS_3	96.8201	1.57819	0	1.60166	3.17985
PBS_4	5.96321e-07	4.6534e-09	0	2.7795e-08	3.24484e-08		PBS_4	94.8394	0.740081	0	4.42053	5.16061
5-FU_1	9.9485e-07	1.02816e-08	0	1.61002e-08	2.63818e-08		5-FU_1	97.4167	1.00678	0	1.57654	2.58333
5-FU_2	9.68898e-08	4.23928e-09	0	8.58401e-09	1.28233e-08		5-FU_2	88.312	3.86397	0	7.82406	11.688
5-FU_3	7.15838e-07	0	0	1.18774e-08	1.18774e-08		5-FU_3	98.3679	0	0	1.63215	1.63215
5-FU_4	7.60286e-07	0	0	2.3105e-08	2.3105e-08		5-FU_4	97.0506	0	0	2.94935	2.94935

## Sheet: 2PG+3PG
A.U.	12C	13C1	13C2	13C3	non M+0		Ratio	12C	13C1	13C2	13C3	non M+0
PBS_1	3.14625e-06	0	0	0	0		PBS_1	100	0	0	0	0
PBS_2	1.53788e-06	4.30948e-08	3.69153e-08	4.12344e-08	1.21245e-07		PBS_2	92.6922	2.59745	2.22499	2.48532	7.30775
PBS_3	2.84194e-06	3.36667e-08	1.12622e-08	6.2983e-08	1.07912e-07		PBS_3	96.3418	1.1413	0.381788	2.13512	3.65821
PBS_4	2.36097e-06	1.37665e-08	1.32064e-08	0	2.69729e-08		PBS_4	98.8705	0.5765	0.553046	0	1.12955
5-FU_1	6.69622e-06	2.85672e-07	1.19255e-08	5.22101e-08	3.49808e-07		5-FU_1	95.0354	4.05437	0.169251	0.740987	4.96461
5-FU_2	2.8395e-06	4.64563e-08	0	0	4.64563e-08		5-FU_2	98.3903	1.60974	0	0	1.60974
5-FU_3	3.96519e-06	8.06238e-08	1.35535e-08	4.99301e-08	1.44107e-07		5-FU_3	96.4931	1.96199	0.329826	1.21505	3.50687
5-FU_4	5.36817e-06	2.39496e-07	9.67534e-09	1.07754e-07	3.56925e-07		5-FU_4	93.7656	4.18326	0.168999	1.88213	6.23439

## Sheet: PEP
A.U.	12C	13C1	13C2	13C3	non M+0		Ratio	12C	13C1	13C2	13C3	non M+0
PBS_1	3.7118e-07	0	0	0	0		PBS_1	100	0	0	0	0
PBS_2	1.46581e-06	0	6.3004e-08	7.49839e-08	1.37988e-07		PBS_2	91.3962	0	3.92843	4.6754	8.60382
PBS_3	5.07925e-07	0	2.1409e-08	8.699e-08	1.08399e-07		PBS_3	82.412	0	3.47366	14.1143	17.588
PBS_4	5.20579e-07	1.19503e-08	4.01673e-08	5.7466e-08	1.09584e-07		PBS_4	82.6103	1.89638	6.37412	9.11923	17.3897
5-FU_1	1.0637e-06	6.82318e-09	6.36451e-09	4.78436e-08	6.10313e-08		5-FU_1	94.5737	0.606652	0.565871	4.25379	5.42631
5-FU_2	4.89761e-07	0	7.09827e-09	7.15468e-08	7.86451e-08		5-FU_2	86.1639	0	1.2488	12.5873	13.8361
5-FU_3	8.5171e-07	0	8.11114e-08	5.86868e-08	1.39798e-07		5-FU_3	85.9004	0	8.18061	5.91894	14.0996
5-FU_4	5.90762e-07	0	1.58216e-08	5.5443e-08	7.12647e-08		5-FU_4	89.2354	0	2.38988	8.37474	10.7646

## Sheet: Pyruvate
A.U.	12C	13C1	13C2	13C3	non M+0		Ratio	12C	13C1	13C2	13C3	non M+0
PBS_1	2.94537e-05	1.23074e-06	0	0	1.23074e-06		PBS_1	95.989	4.01095	0	0	4.01095
PBS_2	7.88764e-06	4.43124e-07	1.39272e-08	0	4.57051e-07		PBS_2	94.5229	5.31025	0.166899	0	5.47714
PBS_3	8.92559e-06	7.09393e-07	0	0	7.09393e-07		PBS_3	92.6373	7.36269	0	0	7.36269
PBS_4	9.49286e-06	4.74733e-07	0	0	4.74733e-07		PBS_4	95.2372	4.76277	0	0	4.76277
5-FU_1	1.77473e-06	2.88926e-07	0	0	2.88926e-07		5-FU_1	85.9993	14.0007	0	0	14.0007
5-FU_2	1.99792e-06	3.99502e-07	0	7.13242e-09	4.06634e-07		5-FU_2	83.089	16.6144	0	0.296621	16.911
5-FU_3	6.34315e-06	4.1384e-07	0	0	4.1384e-07		5-FU_3	93.8754	6.12462	0	0	6.12462
5-FU_4	3.49128e-06	3.99134e-07	0	0	3.99134e-07		5-FU_4	89.7406	10.2594	0	0	10.2594

## Sheet: Lactate
A.U.	12C	13C1	13C2	13C3	non M+0		Ratio	12C	13C1	13C2	13C3	non M+0
PBS_1	0.00600845	0.000225663	3.09359e-06	1.31517e-06	0.000230071		PBS_1	96.3121	3.61725	0.0495886	0.0210814	3.68792
PBS_2	0.00251101	9.17477e-05	1.37387e-06	3.64836e-07	9.34864e-05		PBS_2	96.4106	3.52266	0.0527497	0.0140079	3.58942
PBS_3	0.0044173	0.000173057	2.96347e-05	6.60407e-07	0.000203352		PBS_3	95.5991	3.7453	0.641354	0.0142925	4.40094
PBS_4	0.00341266	0.000141173	2.14019e-05	4.85922e-07	0.000163061		PBS_4	95.4398	3.94811	0.598535	0.0135895	4.56024
5-FU_1	0.00111983	4.25793e-05	1.64174e-05	1.49815e-07	5.91465e-05		5-FU_1	94.9832	3.61156	1.39252	0.0127073	5.01678
5-FU_2	0.00122045	7.05081e-05	1.45891e-05	1.64861e-07	8.52621e-05		5-FU_2	93.4701	5.39997	1.11733	0.0126262	6.52992
5-FU_3	0.00409251	0.000151578	2.57697e-05	2.23364e-07	0.000177571		5-FU_3	95.8415	3.54977	0.603494	0.00523091	4.1585
5-FU_4	0.00320393	0.000127184	2.26475e-05	5.18446e-07	0.00015035		5-FU_4	95.5177	3.7917	0.675183	0.0154563	4.48234

## Sheet: Citrate
A.U.	12C	13C1	13C2	13C3	13C4	13C5	13C6	non M+0		Ratio	12C	13C1	13C2	13C3	13C4	13C5	13C6	non M+0
PBS_1	9.33394e-05	6.03681e-06	7.15494e-07	0	0	0	0	6.7523e-06		PBS_1	93.2539	6.03127	0.714838	0	0	0	0	6.74611
PBS_2	3.41725e-05	2.48578e-06	2.84531e-07	0	3.0639e-08	1.18831e-07	0	2.91978e-06		PBS_2	92.4244	6.72314	0.769556	0	0.0828676	0.321396	0	7.89696
PBS_3	6.41246e-05	4.68536e-06	4.69953e-07	0	0	1.85831e-08	0	5.17389e-06		PBS_3	92.5587	6.76293	0.67834	0	0	0.0268232	0	7.4681
PBS_4	6.74916e-05	5.04305e-06	7.00002e-07	0	6.633e-07	2.75629e-08	0	6.43392e-06		PBS_4	91.3308	6.82435	0.947255	0	0.897589	0.0372986	0	8.70649
5-FU_1	6.66682e-05	5.34034e-06	5.57952e-07	0	4.53499e-07	1.48167e-08	0	6.36661e-06		5-FU_1	91.3013	7.31353	0.764107	0	0.621062	0.0202913	0	8.71899
5-FU_2	0.000267938	1.9025e-05	3.40389e-06	6.74297e-08	1.01758e-07	1.18822e-08	2.09306e-08	2.26309e-05		5-FU_2	92.222	6.54822	1.17159	0.0232087	0.0350241	0.00408976	0.00720412	7.78934
5-FU_3	9.9983e-05	7.68179e-06	1.04566e-06	1.68553e-08	3.44652e-07	3.43862e-08	0	9.12334e-06		5-FU_3	91.667	7.04286	0.958685	0.0154534	0.315986	0.0315261	0	8.36451
5-FU_4	7.78357e-05	5.81641e-06	6.26286e-07	0	1.94721e-07	1.38938e-08	1.11512e-08	6.66246e-06		5-FU_4	92.1426	6.88551	0.741402	0	0.230512	0.0164476	0.0132009	7.88708

## Sheet: IsoCitrate
A.U.	12C	13C1	13C2	13C3	13C4	13C5	13C6	non M+0		Ratio	12C	13C1	13C2	13C3	13C4	13C5	13C6	non M+0
PBS_1	6.52964e-07	0	0	0	0	0	0	0		PBS_1	100	0	0	0	0	0	0	0
PBS_2	1.3291e-07	9.01118e-08	3.6305e-08	1.7326e-08	0	9.12711e-08	0	2.35014e-07		PBS_2	36.1244	24.4919	9.86752	4.70912	0	24.807	0	63.8756
PBS_3	1.55703e-07	0	1.32825e-08	1.39917e-08	1.19519e-08	3.76057e-08	0	7.68318e-08		PBS_3	66.9591	0	5.71204	6.01702	5.13982	16.1721	0	33.0409
PBS_4	1.13069e-05	9.37203e-07	4.06502e-08	0	1.34496e-07	1.59066e-08	0	1.12826e-06		PBS_4	90.9269	7.5367	0.326897	0	1.08157	0.127916	0	9.07308
5-FU_1	4.7094e-06	4.88515e-07	7.75219e-09	0	2.4504e-08	0	0	5.20772e-07		5-FU_1	90.0429	9.34034	0.148221	0	0.468512	0	0	9.95707
5-FU_2	3.73762e-06	2.95063e-07	2.14984e-08	0	0	1.54905e-08	0	3.32052e-07		5-FU_2	91.8408	7.25029	0.528258	0	0	0.380632	0	8.15918
5-FU_3	7.18755e-06	6.00687e-07	1.34462e-08	0	0	3.50443e-08	0	6.49177e-07		5-FU_3	91.7162	7.66502	0.171579	0	0	0.44718	0	8.28378
5-FU_4	4.57791e-06	3.81304e-07	1.02686e-08	0	0	2.48911e-08	0	4.16463e-07		5-FU_4	91.6613	7.63467	0.205604	0	0	0.498383	0	8.33865

[truncated: 22 more sheets: 2-OG, Succinate, Fumarate, Malate, 6PG, E4P, PPRP, R5P+Ru5P+Xu5P, S7P, Asn, Asp, Gln, Glu, Glutathione (reduced), ATP, IMP, N-Acetyl-L-glutamic_Acid, Acetoacetate, N-Acetylaspartate, Gluconic acid …]
