# Supplementary material for: Context-dependent modification of PFKFB3 in hematopoietic stem cells promotes anaerobic glycolysis and ensures stress hematopoiesis
Source: eLife. 2024 Apr 4;12:RP87674. doi: 10.7554/eLife.87674 (PMC10994660; doi:10.7554/eLife.87674)
Supplement: Supplementary file 6. [file elife-87674-supp6.xlsx]

## Sheet: Sheet1
GO-ATeam2 genotyping
Primer name	Sequence
55_CAGGS-5F	5’-AGAGCCTCTGCTAACCATGTTCATGCCTTC-3’
570_KusabiraOrange-141R	5’-GTGACACTAAGTCAAACGCGAAA-3’
oIMR0872	5’-AAGTTCATCTGCACCACCG-3’
oIMR1416	5’-TCCTTGAAGAAGATGGTGCGA-3’
